# Supplementary material
Source: PubMed Central journal article supplement (PMC8223930)
Supplement: jvi.00484-21-s0001.pdf [file jvi.00484-21-s0001.pdf]

Supplementary Materials for

**Multiple infiltration and cross-species transmission of foamy viruses  
across Paleozoic to Cenozoic era**

Yicong Chen<sup>†</sup>, Yu-Yi Zhang<sup>†</sup>, Xiaoman Wei, Jie Cui<sup>\*</sup>

<sup>†</sup>These authors contribute equal to this work.

\*Correspondence: [jcui@ips.ac.cn](mailto:jcui@ips.ac.cn)

This PDF file includes:

- **Fig. S1** Detailed descriptions of the putative genomes of consensus ERV-Spuma-Rbi, ERV-Spuma-Smu, ERV-Spuma.a-Ame and ERV-Spuma.b-Ame
- **Table S1** The endogenous foamy viruses or expressed foamy viruses identified in amphibians
- **Table S2** Information on the representative retroviruses
- **Data set S1** The nucleotide sequences of consensus genomes of 4 EFVs
- **Data set S2** The alignments used to build the phylogenetic trees for RT represented in Fig.1
- **Data set S3** The alignments used to build the phylogenetic trees for Pol represented in Fig.3
- **Data set S4** The alignments used to build the phylogenetic trees for Env represented in Fig.3
- **Data set S5** The alignments used to build the phylogenetic trees for Gag-Pol-Env represented in Fig.4

>ERV-Spuma-Rbi

5' -LTR

|      |                                                               |      |
|------|---------------------------------------------------------------|------|
| 1    | TGTCAGAAAATATCTTAATATTTTGTGCTTTATTGATAACTTATATTTAGTGAAGTC     | 60   |
| 61   | AGTAATCAATTAGCCATAAAGAAACATGTTAGCATTTAATACCCATAAGCCTTACTTTT   | 120  |
| 121  | AAAAGCCATGACATCGGTCATGGCCTGTGCTGAAAAAGCTCCAGCACATAGCTTTCACCT  | 180  |
| 181  | TTCCCTACTTAAAACCTCAAGATTTACCTTTGTCCACTTTTCAGACTTTGAGAGTACA    | 240  |
| 241  | GTTGTTTACCACTTATCTCTTATCTCAAGTAAGAAAGCACCTGCATTTTATGACATTGAG  | 300  |
| 301  | CATCCTAAACGCAGGTGTCATGATTGACCACCTAAAAACAGATGGCCAGCCAATTAAGC   | 360  |
| 361  | GTGAATCTTGTGACAGAAGGGAGTGAAAAAGATTTTCTCTTAGAACTACAAAAGAAGATT  | 420  |
| 421  | TATCCAATTA AAAATCAAAAATGGGCGAAGCTATAAACAGAATAAGAATAAATCCTATAT | 480  |
| 481  | TTTACTGTTCTGATATGAAAAATTGATTGAACCTTAGTCAAGGTCTCTAGAAATGAAGTT  | 540  |
| 541  | CTTCAAAGGCTAAAATATAGATGTGTTGATGGAAGTGTAACAGCGACCCTGGATCAAAGG  | 600  |
| 601  | AATCAAAGGGTCTTAAGTGTATAAAACAGTGAGCAGTTTGAGGGAGAGGGAGAGGTGCTA  | 660  |
| 661  | CTTAGACTTTCTTCGCACGTGATTGAGAGAGACACAGAGCGGGTGCTTCAGATTAATTG   | 720  |
| 721  | GTAAATATAATTTTTTATTCAAGTATATGAGAACCTTTAAATTGCTATTGTTTCTACATT  | 780  |
| 781  | GGCAGATGTATTAGAAATGTATTAATTTCTAAAAAGATGACATTAATAGACATTTATCTG  | 840  |
| 841  | ATATTAATAATTTCAATTACTTTTTTTAATGGCTCTTGCATTGATTGTAGGATATACTC   | 900  |
| 901  | TGGTAAAGTTAAGATTTGAACATAAAAAGTGTTCCTTAGTCATTTAGAGATATTTATTCAT | 960  |
| 961  | GCCTTTCTTTATCTGTGAAATAAAGAAAATATTTTTACAATAAACTGACTGGTTTATTTA  | 1020 |
| 1021 | TGCATGATGTGCTGCAAGAATTAATGGTTAATAAAAAATTTCTGTGGTAGATTCGAACAC  | 1080 |
| 1081 | ACCTCTGAAAGTAACTTTTTGTCTCAAGGCAGAAAGGGTAGGGAAATAGAAGTGAAGT    | 1140 |
| 1141 | GGGAGTATTTTATCCAGGCAGGATCCCTGGTTTTAAATTCTGCTAAGGGTAGAAGCCTC   | 1200 |
| 1201 | AATACTTCCATTCAAATTTACCACA TGGCGCCCAACGTGGTTTAAATCTCCTGTAGAAT  | 1260 |

1261 TAAATATTATTTCCAGTCTATGTAATTTTGCCTTTTGCAGCAGTTTTTATAATTGGTTG 1320  
 |→ Gag ORF start

1321 CAATGCTGACCCTTATAGAATTAGAGCTTCTCAAGAAGCAACGTTCCGTAAGTGGGTTG 1380  
 M A D P Y R I R A S Q E A T F R K W V

1381 AAGCCAATCATATCAGGGAAGATCAGTCCTTTGCCTGCATTTACAAGTGGCCAGTGACT 1440  
 E A N H I R E D Q S F V L H L Q V A S D

1441 CGTCACCGTGCTTTTCATGTTGACATTTGTCGTTTAAAAGCTTTACTGCACAGGGCAGAC 1500  
 S S P C F H V D I C R L K A L T A Q G R

1501 ACCAGGGGCTAAATAGAAGAGCAGAAGAGGATTTTGTTCCTTTTGCTCTCCCTGATTGTC 1560  
 H Q G L N R R A E E D F V P F A L P D C

1561 AGATGTCTTTTCACTTGGTAAATGCTTATTTGTAGAGAATCCGGTAATTCCGTTTCTG 1620  
 Q M S F S L G K C L F V E N P V I P V S

1621 AAAAAAGAGGGGGCTTGGCGTTCAGTGAACCGCGTCCGCCTTTGATGCTATTTTGTCT 1680  
 E K R G G L A F T E P R P P L D A I L S

1681 TTGATGCCCGCCTGTGGATCAAATCCGGCAGGGAAAAAGAATGCGTTTTACAATGCC 1740  
 F D A P P V D Q I P A G K K N A F Y N A

1741 TATTGACTGCTTTCAAACGCTCAGAGATCATTACGGACAAACCTCGTTTTCTTTGGGGA 1800  
 L L H C F Q T L R D H Y G Q T S F S L G

1801 CGCCTGGAGAATTCGGGGCCCGTAGTGAGATTGATCGAAAAGCAGATAGAGTAAGGCGGG 1860  
 T P G E F G A R S E I D R K A D R V R R

1861 CTTTGGGGACGCTTCCAGCTGATGTTAATCTGATACCTGAACATCTGGCCACTAGACTAG 1920  
 Gag\_spuma super family (c126624)  
 A L G T L P A D V N L I P E H L A T R L

1921 TCGCGCTTGAAGCTGTCAGTGGTGCCTGTAATTCTCGTACCAGACATTATATTATTCTA 1980  
 V A L E A V T G A C N S R T R H Y I I S

1981 CTCTGATGCCACAGAATTTGGTTCCTCCCCCTCATTCTGCGATAGCTGGGGCAGTTATT 2040  
 T L M P Q N L V P P P S F C D S W G S Y

2041 ACGGGTGGACTTATCGTTCGATATTTGGGAAACCGTTAATCACAAATCTCGGTGAAGTGC 2100  
 Y G W T Y R S I F G K P L I T N L G E V

2101 TGCGTCATATTTTGCAAAGTTTGGTATTTAGCTGCATATTCTTTGGCATGCTGGTTA 2160  
 L R H I L Q K F G I S A A Y S L G M L V

2161 CTATGAGTAATTTTGATCAAGTATGGGAGATTTTAAAAGACGTCATGCCTGATACCTCTA 2220  
 T M S N F D Q V W E I L K D V M P D T S

2221 TTCGTATTGATCTTAGTAATCGTTTAAAGTGCATTGGCCCCGGCAGATCGACATGAGCAGT 2280  
 I R I D L S N R L S A L A P A D R H E Q

2281 TCCATTATTATCCAGCAAGTCTTCGAGGCGGCTGGTTCGTCATTAATCCCTTCTAAGC 2340  
 F P F I I Q Q V F E A A G R P L I P S K

2341 CACTTAAACAGGCTCAGCCAGGGTCTGACAGACCCAGGGAAAGGGCAGAGAGATCCAGC 2400  
 P L K Q A Q P G S D R P R E R G R E I Q

2401 GCACTCAGCCTGAGAAAACCTCAAGACGGGTGAGTTTTTCATTTAGGAATCCTTCTTCCC 2460  
 R T Q P E K T S R R V S F H F R N P S S

2461 AGGATAGAAAATCAGAGGGACAATAGGGGGTTTGGGAATTCTAGACAGGATTATACACCCC 2520  
 Q D R N Q R D N R G F G N S R Q D Y T P

Gag ORF end ←|

2521 CCCCTCCACGAAATCCCTCTAAACTACTGGGTGGGTTCCCCGCTATCCTGTGAGGGATAAT 2580  
 P P S T K S L \*  
 2581 CGTGGGACCCCTCTGCCCGCTTCCAGCTCCTGAGAAACCTCCAGCGGTGTCCGGAGCT 2640  
 2641 GTAACCTAAGGCAGACCGCCCTCCCCCTTCTTCTCACAAAAAGCCTGTGAAGCGAGCCACT 2700  
 | → Pol ORF start  
 2701 TTCCATGGCAATGCTGGCTCCACGTCTAAACCCCTGTGGATCCAGAATAAGGAGCAGGG 2760  
 M A M L A P R L N P L W I Q N K E Q G  
 2761 TGATCTATTTGTGGGCATGATGGACTCAGGTACTACAATTAATATCCTGACTAGAGAATG 2820  
 D L F V G M M D S G T T I N I L T R E W  
 2821 GGATACAATTCAATATTTAAATGAAAATGTCACAATTACTATGTTTGAGGGAAGCAGTC 2880  
 D T I Q Y L N E N V T I T M F A G K Q S  
 2881 TCAAGCTCCCTTAGCGACTGTAGAAATCTTTCCCTTACTTCAAAGGGTCCCCTACCAT 2940  
 Q A P L A T V E I F S P Y F K G S R T I  
 2941 AAAAGTGGCATGTTTATTTGATGAGGAGGATCCTTTTGAATTTATTTACACAGGCTGC 3000  
 K V A C L F D E E D P F A I Y F T Q A A  
 3001 TGTGCCTGTTTTGCCTTCTATGATGTTGGAGGACCCCTTTATGGCTTTGAGGCTGTAAA 3060  
 V P V L P S M M L E D P L Y G F E A V K  
 3061 AGCTTCAATTTCTCCTCAGCTCAAATCCATCATTGGAGAGGCTGAGCTGCAGAATTTGTT 3120  
 A S I S P Q L K S I I G E A E L Q N L F  
 3121 TACTGAATGGCTTAAGTTAGGGTTCGTTTCAGCTCTATCATACCCACACTGGTTTAGTGCA 3180  
 T E W L K L G V V Q L Y H T H T G L V Q  
 3181 GACCCCTAAGCCGATAGAGATAGTTTTAAATAAGCCTTTTCAGTCCTCAAAAACAGTATCC 3240  
 T P K P I E I V L N K P F S P Q K Q Y P  
 3241 TGCCATAAGAAATTCTACAATGATTTAAATATTATTATTTCTCAGAACTTACTCAGGG 3300  
 RT\_like super family (cl02808)  
 V H K K F Y N D L N I I I S Q K L T Q G  
 3301 TGTTTTAATTGAGGAATATTCTGAATTTAATTCACCCCTCCTTCTGTGCCCAAACCAAA 3360  
 V L I E E Y S E F N S P L L P V P K P N  
 3361 TGGGAGTACTCGTATGGTCATTGACTATAGGGTACTTAACGCCTCTTCTGAGACAGTTGC 3420  
 G S T R M V I D Y R V L N A S S E T V A  
 3421 GGCTCAGACTTTGAATCCTGCATCTACAATTGATAATTTGCCACGTCCTAGGTGGAAAGC 3480  
 A Q T L N P A S T I D N L P R P R W K A  
 3481 CACCTTGGATTTAGCTAATGGTTTTTGGAGTATTCCGATTAGCACTTCCCCTGTCACTGC 3540  
 T L D L A N G F W S I P I S T S P V T A  
 3541 ATTCACATTCAGGGGTAAGCAGTATCAGTATACCAGGCTCCCTCAGGGTTTTAAAATTC 3600  
 F T F R G K Q Y Q Y T R L P Q G F K N S  
 3601 CCCTGTTTTATTTCTGCTGCCGTTGAGGAACTCCTTCAGCGACATAACATTGATAATGC 3660  
 P V L F S A A V E E L L Q R H N I D N A  
 3661 TGTTCTTATGTTGATGATATATATCTGGCTTCTGATAAGCTGGATGTGCTTTGGGATTC 3720  
 V P Y V D D I Y L A S D K L D V L W D S  
 3721 TGTGTTAAACTAATACAGGTAAGGTTGAGGAAAGCCTTTGTAGTTAATTTGCCAAAGC 3780  
 V V K L I Q V L G E E G F V V N F A K A  
 3781 CAGAATTGTTTTGAGGAAGTTAAGTTTCTGGGATTTTAAATCGGGGTGGCAGGTGCTAG 3840

R I G F E E V K F L G F L I G V A G A S  
 3841 CCTTGCCCCACCCTCCAAGAAAAGATTATATCCTTCCCAGTGCCTAAGACATCTCGCCA 3900  
 L A P T L Q E K I I S F P V P K T S R Q  
 3901 ATTGCAAGTAATCATGGGGACACTTAATTTTGCACGTAAACTGTGCCTAGTTTTGCCTC 3960  
 L Q V I M G T L N F A R K T V P S F A S  
 3961 ATTAGCAGCCCCCTTGTATGATTTGCTTAAAGGAGATGCCGTTGTGGCACGTGATTGGAC 4020  
 L A A P L Y D L L K G D A V V A R D W T  
 4021 TGCTGTTTCATTCTGAATGTTTGAGAGCGCTGCAAGAGGCTGTCAAAGTTTCAGCCCCTTT 4080  
**RT\_RNaseH\_2 super family (c139038)**  
 A V H S E C L R A L Q E A V K V S A P L  
 4081 GGCGCACCGTAAATCATCTAAAGATTTAGATGTCACGTTGCAGGTTTCTGACTCTCATT 4140  
 A H R K S S K D L D V T L Q V S D S H F  
 4141 CTTGGCTACAATCAGTAACCATGCTGAATCTCAGCCCATATGTTATATTACATACTTT 4200  
 L A T I S N H A E S Q P I C Y I T H T F  
 4201 CTCTCAGCCTGAGAGGAAATTTAATATTGTGGAGCGTACACTGACGGCTGTCAGATATTG 4260  
 S Q P E R K F N I V E R T L T A V R Y C  
 4261 CCTGTCTAAAGTCTCTGCTCTTGCTCAGGGTAAGATTATTCATTGTTATACTGGGATTCC 4320  
 L S K V S A L A Q G K I I H C Y T G I P  
 4321 CCAGTTACAGGCTGTCACTCGCCATTCCTCCCAGAGAGTAGGGCTCTCTCCACACGCTG 4380  
 Q L Q A V T R H S L P E S R A L S T R W  
 4381 GGTGCAATGGCGTGCTGATCAATATAGAGACGATGTGCAATTCCATTATCAGAATGGTTT 4440  
 V Q W R A D Q Y R D D V Q F H Y Q N G L  
 4441 GGCTGATTCTGACATTATTTAACTTGTGAGGATCTTTGCTTAACTACTGAGACGGATAG 4500  
 A D S D I I L T C E D L C L T T E T D R  
 4501 GCTCCTTCTCTATTTATCAGAAGGTTCAATTGGTAATTTTTACTGATGGTTCTGCCAC 4560  
 L L P P I Y Q K V Q L V I F T D G S A T  
 4561 ACCCTCGGGTGACTATCTTACTGCATTTTTTGTGGTGCAGCTAATGTTATTTAACTCC 4620  
**RNase\_H\_like super family (c114782)**  
 P S G D Y L T A F F A G A A N V I L T P  
 4621 TAATAAAAAGGGGTCAGTGGAAAGTCTTTGCCACACATACTTGGCGATTAGGTGATAGAG 4680  
 N K R G Q W K V F A T H T W R L G D M S  
 4681 TTCACAGCAGGCGGAGCTGATTGCCTTTCAAAGGCTTTGACACATATTGAGCAAACGCC 4740  
 S Q Q A E L I A F Q K A L T H I E Q T P  
 4741 CAATTTGGATCCTGAAAGATCCGTTATGGTTTGTCTGATTCTACATATGTGGTGTCTGG 4800  
 N L D P E R S V M V C S D S T Y V V S G  
 4801 GTTTAATTCACATATGAAAGTGTGGGAAAACAGTGACTTTTTAGATGTTACAGGCAAGCC 4860  
 F N S H M K V W E N S D F L D V T G K P  
 4861 TATTGCACACAGAGCTCACTGGAGATTAATTTTTCTATTTACAGAAACTTACTGTGCA 4920  
 I A H R A H W R L I F S I S Q K L T V Q  
 4921 GGTGCTTGTCTTGCATGTGCCTGCTCACCAGACCGTGGGCTGGTACTCTCGTTACAATTC 4980  
 V L V L H V P A H Q T V G W Y S R Y N S  
 4981 TTTGGCAGATGAAGCAGCTAAATTGGCTGCCTCTCAGCAAGAGATAACTGTAAGGGCACG 5040  
 L A D E A A K L A A S Q Q E I T V R A R  
 5041 TCTTGCTAGGCATGGCTCCTTACATTTGAATGCGGCTACTTTGTGCCAGCATTAGATGG 5100

5101 L A R H G S L H L N A A T L C Q H S D G 5160  
 GGTTTTGACTAGAAAGTCAGGCAAAGAAAATGGTCAGTGACTGTTTGGATTGTCAGCGCAC  
 5161 V L T R S Q A K K M V S D C L D C Q R T 5220  
 AAATCCCAAACGGACTGGACACCCTTATGTTGAAGGGACTTCCACGGGGAATTAGACC  
 5221 N P K R T G H P Y V E G T L P R G I R P 5280  
 AGGGCAGGTGGTCTATATGGATCATGTTGGTCCCCTTACTTCTTCCCCTGGTTACAGACA  
 rve (pfam00665)  
 5281 G Q V V Y M D H V G P L T S S R G Y R H 5340  
 TATTTTGGTTGACTTGATTCCCTTACTGGCTTTGTGTTTCTATTTGCACAGAAACGCAT  
 5341 I L V V L D S F T G F V F L F A Q K R I 5400  
 TACTGCTATTGTAAGTGTAAACCGTCTGGCTATTGTATTTGGTATTTTGCCTTTTCAGTT  
 5401 T A I V T V N R L A I V F G I L P F Q F 5460  
 TCTTTGCACAGACGGCGGTCCAGCCTTAAAAATGCTGAGGTTGAGACCTTTTGTGCTGA  
 5461 L C T D G G P A F K N A E V E T F C A D 5520  
 TCATAGCGTTACTCATCGATTCTCCTACCCACATCGTCCAGAATCTAATGGAATGGTTGA  
 5521 H S V T H R F S Y P H R P E S N G M V E 5580  
 AAGGATTAATGGTGAGGTTAAGCGTAGTCTGCAAATTTTGCCTTGCAATCTAACCCAG  
 5581 R I N G E V K R S L Q I F A L Q S N P S 5640  
 TAATTGGTACCTTCATCTTCCGGAGATCCAAATCCGGATTAATAGTACCATAACTGCCAA  
 5641 N W Y L H L P E I Q I R I N S T I T A N 5700  
 TCATGAAGCTCCCGCTATGTCTCTCTTTGGGTTCTCTATGCTTGAAAATATGGCCTCCTC  
 5701 H E A P A M S L F G F S M L E N M A S S 5760  
 AGAAGCTATGGTTACTTCTGACAAGGCCTCTCGGAGTCCAAATCCTTTTCAGATTGGTTC  
 5761 E A M V T S D K A S R S P N P F Q I G S 5820  
 CGTAGTTTTGAGCAAACGCATGTTTCGTGGCTCTTTAGAACCATACTGGTCTAATCCCTT  
 5821 V V L S K T H V R G S L E P Y W S N P F 5880  
 TATTGTTACAGAACTTCTAGGTGACTCGGGACTGTTGCTTTCTGACTCTGAGGATCCAAA  
 5881 I V T E L L G D S G L L L S D S E D P K  
 |→ Env ORF start  
 5881 GAATAGGAAAGTTGTGTCCATTAGAGATGTC AAGTTGGTATCCGAGACATTGGGGTTTTTC 5940  
 N R K V V S I R D V K L V S E T L G F S  
 M S S W Y P R H W G F  
 5941 CGGTACCAGAGCCTCGGTTCAACCCCCAGCCTCTGCTGCATCCGCAGTTTCCGCTGATGC 6000  
 G T R A S V Q P P A S A A S A V S A D A  
 P V P E P R F N P Q P L L H P Q F P L M  
 Po1 ORF end ←|  
 6001 CAATGGGTCAGGAGGATCTACCGCTGCCAGCGCTCCCACTGCTCCAGCAATGATGTCA 6060  
 N G S G G S T A A Q R S H C S S N \*  
 P M G Q E D L P L P S A P T A P A I D V  
 6061 TTCTCAGCGGTGACATGGCTGTGCCTACCCCGGAGCAGGAAGATCAGGTCGTTCTCAGTG 6120  
 I L S G D M A V P T P E Q E D Q V V L S  
 6121 TAGCTTGTCCCGCATCTGAGCGTCTCCATGTTTAAACCCGCTTTTCAGCAGAAGCTTTTGC 6180  
 V A C P A S E R P P C L T R F Q Q K L L  
 6181 TTGCATGCTGTATGGTTTGTTCCTCAATCAGTACCTTTTTGCATGCTGTGTTTCTTTTTT 6240

L A C C M V C S P I S T F L H A V F L F  
 6241 ACAGACCTTATTGTAAGTATGTTATTGCTTGCTGGGTGCTTTTAAATTATTGCATCTCCTA 6300  
 Y R P Y C K Y V I A C W V L L I I A S P  
 6301 TCTCACTATTTTATCTCTTATCTAATACCCAGCTGCATTCCACCTTTTCTCCCGCAGCTT 6360  
 I S L F Y L L S N T Q L H S T F S P A A  
 6361 CACAGGAGCTCCGTTATTCACACTCACATGTCAGTAAGCGCTCACCTTCTGAGCCTTTGT 6420  
 S Q E L R Y S H S H V S K R S P S E P L  
 6421 CTCTTCTGGCAGTGCCTTTGCCTTCTGGTGTATTCTTGTTCATACCATGGCTGGCTGG 6480  
 S L L A V P L P S G V I L V P Y H G W L  
 6481 TGCAAGATCCTGTTTTATTGCATATTGATGTTCCCTTTCAGGTTTTACTCACCAGGTTT 6540  
 V Q D P V L L H I D V P F R F Y T H Q V  
 6541 GGCAAGGCATCTCTCCGGAGTCCCTGCCTGCGGGTCTAGAGTCCAGACTTGTTGCTCTGT 6600  
 W Q G I S P E S L P A G L E S R L V A L  
 6601 TTCTGCAGCTGGAGCGTTCCTCCCTGCAGCTTCTTCCATCACTTCGGAATCTCCTCTTG 6660  
 F L Q L E R S S L Q L S S I T S E S P L  
 6661 ATGGCTTCCGTGCAGAGTTCTGTTTCGATTAGATATCAGAACTTGTTCTGGGTTTCAGAG 6720  
 D G F R A E F C S I R Y Q N L F L G F R  
 6721 CAGTGAGTGTCAATCTTACTGGGATCCTTAAACTCCATCCTGGAACTGCAGCACTGCT 6780  
 A V S V N L T G I L E T P S W K L Q H C  
 6781 CTCAACCACATATTGGTGCTTCTGAACAGTTCAGCGGCTGTTTGCCTTCTGCTCTTGT 6840  
 S Q P H I G A S E Q F Q R L F A L R P C  
 6841 TTCATAATGGATCTTGTGCCTGCATCAATCCCCTTTCGAAGGTGCCTCTGGAGGACTCCT 6900  
 F H N G S C A C I N P L S K V P L E D S  
 6901 TGTCTGGCTCTAATTATGAATTTTCAGGTTTGATTAAGGTCTCATTTTCTCCTGGATGG 6960  
 L S G S N Y E F S G L I K G L I F S W M  
 6961 ACATCTTCTCTGAGGTAACACTTTCTTACGCTAATTATTCCACATGGGGGGGAGAGGATA 7020  
 D I F P E V T L S Y A N Y S T W G G E D  
 7021 CAGGATTCCCCCTTCCAATGATTAAGGACTCTCTGTCTTATGTTTGTAGACTACCTTATG 7080  
 T G F P L P M I K D S L S Y V C R L P Y  
 7081 AAATTCTGTTTTTAAATAGTACACATTATCATGTCTTTTGTGATGAATTGCCTGTCTCTT 7140  
 E I L F L N S T H Y H V F C D E L P V S  
 7141 TTACACATTGGCGTGAATTTCTTTTTATAATTTATCTTTGTGGAATAATGCGTGTGGGA 7200  
 F T H W R G I S F Y N L S L W N N A C G  
 7201 ATAATCCATTCTTTTGTACCCGTTCCCTCGTCCACCCAGACAAATTGCTTTTGTGGCCTA 7260  
 N N P F F C T R S S S T Q T N C F C C P  
 7261 GTTGGAATATCAGGTTAATCTTTGTAATAAAAGGTTTTCTAATAGGGTATGGGGACCCT 7320  
 S W Q Y Q V N L C N K R F S N R V W G P  
 7321 TCTTACTCAGGAGGCTAATTTTTTCAAATGCACCTGTGCTAGGCCGGTCTTTGACCG 7380  
 F F T Q E A N F F Q N A P V L G R S L T  
 7381 CTGCCTGTATCAGGGGTTAGCTGAGGGGTTAAATGCACTGAGGTTACTTCTGTGTTAG 7440  
 A A C I R G L A E G L N D T E V T S V L  
 7441 ATTTAATTGTACAGACAAAATGGCTGAATGACTCATTTCCTTGGCCGCTTGGGTGATGA 7500  
 D L I V Q T K W L N D S F P L P A W V M  
 7501 GAACAGCCAACAGAAAGCGCAGGAATGCTTTGAAACAGGAGGTTCAAATACATTCTTA 7560

Foamy\_virus\_ENV super family (c104051)

R T A N R K R R N A L K Q E V Q N T F L  
 7561 ATCTTAATGATAGAATTA AAACTGCTATAAAAAGGTATTCAATCCAATGAATATCAGCTAA 7620  
 N L N D R I K T A I K G I Q S N E Y Q L  
 7621 GAGCAGGTATTTTTCAATTAAGGGATTACTTAGCTCAAACCTTACAGTTAGGGATTGATG 7680  
 R A G I F Q L R D Y L A Q T L Q L G I D  
 7681 CCATATCCACA ACTGATGAGAAAATACAGGTTCTAGCAAGAATAGAACAGCTTACTCACT 7740  
 A I S T T D E K I Q V L A R I E Q L T H  
 7741 TTATTGATGGTCTTACTTCCCCAAAACCAAATGGGGAGACCTTCAATTGGGAAAAATAT 7800  
 F I D G L T S P K P K W G D L Q L G K I  
 7801 TAGAGGAAATAAACCTCACAGCTGAGCAAATTCAGTATGCCCATGTTGAGGCTTACAAG 7860  
 L E E I N L T A E Q I Q Y A H V E A S Q  
 7861 TTATTTTGCAGGTCAGCAAACATGAAATGGGAAAAGAACCATGGGCAACCTTAGGTTCAA 7920  
 V I L Q V S K H E M G K E P W A T L G S  
 7921 CCCTAGTACAAGGGGTCAGACGTATCTTTCTCCAATCACTACTCAGGTCTATAAACGTT 7980  
 T L V Q G V R R I F L P I T T Q V Y K R  
 7981 GCTGGGAAATCCAGA ACTTTGGTCAGTCTTGAAAGCTCAAATGGAAGCAACACCTGGA 8040  
 C W E I Q N F G Q F L E S S N G S N T W  
 8041 TTAAAACAATTA AAAATCTTTGAACCAACCACTTGTGTATTAATAATGCTGGTTACTACT 8100  
 I K T I K I F E P T H L C I N N A G Y H  
 8101 GGATCATAGCACAAGGTTGTCACAAAGTCTCTGTA ACTGTGTGTAATTCCTGGTGCAGG 8160  
 W I I A Q G C H K V P V T V C N S L V Q  
 8161 TCTCTAATACTTGCCTCACACTAGAGGGAGAAGCTGATTGTCCTCTAGAACCGAATCCCG 8220  
 V S N T C L T L E G E A D C P L E P N P  
 8221 GTCCTCTAGTAGAAGTTTTTTTTGAAATTACCCAATGGATCTTATATCCTTCGGTCAAACA 8280  
 G P L V E V F L K L P N G S Y I L R S N  
 8281 AAGCACAGTGTGGGTTTCAACCGGGAATATTGTATTTAGTTACTGCACTATCTGTCATTA 8340  
 K A Q C G F Q P G I L Y L V T A L S V I  
 8341 AGTGTGGACCGTGGGAATTTTATCCTACACTTAGTGCCCGGTTAACTGAAACAATAAAGT 8400  
 K C G P W E F Y P T L S A R L T E T I K  
 8401 ACATGGAATTTAAACAGTACAATTCAGTGAAGTAAAAATGTTATTGACTCATGTTTTAA 8460  
 Y M E F K P V Q F T E L K M L L T H V L  
 8461 ATGTAAATGTATTATTAAGAAATTTGTCTTCACTTTGGTTAATGTCAGAGGATGAGTTTT 8520  
 N V N V L L R N L S S L W L M S E D E F  
 8521 TACAGCATCTGAGAATGATAGAACTAACAGCTAGTGAATGGGAGCTGATCCTAGACGAGC 8580  
 L Q H L R M I E L T A S E W E L I L D E  
 8581 TACTGAAGCCAGAGGTATTTTCAAATGCCCTGGGTCGTGCTTTTTCTGGATTAGTGGGTG 8640  
 L L K P E V F S N A L G R A F S G L V G  
 8641 GAATAGCTAAAACAGCTGTTGGTGTAGTTAAAACATAATGGAAGGGGCAGGTGGACTCC 8700  
 G I A K T A V G V V K T I M E G A G G L  
 8701 TTCATGACTTAGGGATCAATTTATCCCATTAATCCTGGGAATCATAGTAATAATTGGTG 8760  
 L H D L G I N L F P L I L G I I V I I G

Env ORF end ←|

|→ Acc ORF start



8761 TTCTTTTCTTCTGTCTTAAGAGAAAT**TAG**AACGAAGAGCAGCGAACCCAGAA**ATG**GCGAGGT 8820  
**V L F F C L K R N \*** **M A G**  
 8821 GTAAACTCAAAGATACATATTCCAGCTAATCCTAGGAAGAATGCGATGATTGTCTGCCTG 8880  
**V N S K I H I P A N P R K N A M I V C L**  
 8881 GGACCTGATCTCATAAATGAGTATGCTGATTATGGAAGCTGGATGTATTCAGAAAACAAT 8940  
**G P D L I N E Y A D Y G S W M Y S E N N**  
 8941 CCTGATACATGTGCACCTTATTATCTGCATAAAAACTGTGATATTTTATTTAAGTTCCCA 9000  
**P D T C A P Y Y L H K N C D I L F K F P**  
 9001 CAATATTCCTATTGCTGGACTTGGCCAAGAAGACTGGCATCTGTTCGTGAAGCACTACGA 9060  
**Q Y S Y C W T W P R R L A S V R E A L R**  
 9061 AGAACCTTGAGTGCTCACATTTGTCAGTGTGCTCCCTGGGAACCTGTGCCCTGCTACTTC 9120  
**R T L S A H I C Q C A P W E L V P C Y F**  
 9121 AATATCTACTCTTTGGCAGAATATCAATTAGGATATGGACATGGCCTATCAAATGCCAAT 9180  
**N I Y S L A E Y Q L G Y G H G L S N A N**  
 9181 CCTGTTGCTTCAGATGGAAATCAAGAGCCTCCAGCCCGGGTTAAGCTCGAATTGGTTT 9240  
**P V A S D G N S R A S S P G L S S N W F**  
 9241 CCAGTACCTAGTCCACAGTCTTTTGCACGGATGAAGAATTGGATCCAATGCACCTTGCT 9300  
**P V P S P Q S F A T D E E L D P M H L A**  
 9301 CCGGCTAATTCTCTAACAGATGAAGGACAAGACTTTGTGCTTTGGCTGAATGCAGCTCTC 9360  
**P A N S L T D E G Q D F V L W L N A A L**  
 9361 TCCTCTGAGGATGATCAATCAGTCATTCTCCAACATCAGCAACCAAATCCTACTCAAGAT 9420  
**S S E D D Q S V I L Q H Q Q P N P T Q D**  
**Acc ORF end ←|**  
 9421 TCTGCTCCGACTAGACCAGCAGTGGAAAGCGAGCAAACAGATTCCAATATCTATAAT**TAG** 9480  
**S A P T R P A V E G E Q T D S N I Y N \***  
 9481 TCAGACTGACTTCACAGATATCTGAAACGTCTGATCCGGCTGGATCTACTGAGAACTGTG 9540  
 9541 AATAACTGTCTATTATTGACTGGACTGGTATGTGTCTTATTCAAATGCACCTTGCCATT 9600  
 9601 TCAGGATCGTTGCTCATCAATTGGTAAGTATAATAGGCATTTAATGCCACAGATCCCTA 9660  
 9661 CACATGATGGAATCAGTGATGACACATCACAGATTTCTGACCCATAGAGATTATTTAAT 9720  
 9721 TATGAACCCTCATCTTATTTGACTGGATGAGCAGCTTCAAATTTAAAATTTACATTCCCT 9780  
 9781 GGGTATGAATGTTCTCTATTTCCATAAGGAAATATTGAGAACTCTTTATATCTGGTTA 9840  
 9841 TTATTAGAACTAACTCAGATTTGTCAACTCATATCTCTTTATATTCAATTTGGTAATGT 9900  
 9901 AACCAATTTTTATTACACTTGTATTATTACATTTGATTTTCACTTGTATCTATGCAATGT 9960  
 9961 TGAGCACTGACACAACCTTATTATATGTAGTTTATTGTGTGATTATTTCCCCCAGGCTTA 10020

10021 TTAGTGCCTTACTGATTTATATGTATCTAGCTATGTCTAGTATTTGTTTTACTGACTCCA 10080  
           3' -LTR  
 10081 TGGGGGGG**TGTCAGAAAATATCTTAATATTTTGTGCTTTATTGATAACTTATATTTA** 10140  
 10141 **GTGAAGTCAGTAATCAATTAGCCATAAAGAAACATGTTAGCATTTAATACCCATAAGCCT** 10200  
 10201 **TTACTTTTTAAAAGCCATGACATTGGTCATGGCTGTGCTGAAAAAGCTCCAGCACATAGCT** 10260  
 10261 **TTACCTTTCCCTACTTAAACCTCAAGATTTACCTTTGTCCACTTTCCAGACTTTGA** 10320  
 10321 **GAGTACAGTTGTTTACCACCTTCTCTTATCTCAAGTAAGAAAGCACCTGCATTTTATGAC** 10380  
 10381 **ATTGAGCATCCTAACGCAGGTGTCATGATTGACCACCCTAAAAACAGATGGCCAGCCAAT** 10440  
 10441 **TAAGCGTGACTCTTGTGACAGAAGGGAGTGAAAAAGATTTTCTCTTAGAACTACAAAAGA** 10500  
 10501 **AATCCAATTA AAAATCAAAAATGGGCGAAGCTATAAACAGAATAAAAATATAGATGTGTTG** 10560  
 10561 **ATGGAAGTGTAACAGCGACCCTGGATCAAAGGGTCTTAAGTGTATAAAAACAGTGGCAGTT** 10620  
 10621 **TGAGGGAGAGGGAGAGGTGCTACTTAGACTTTCTTCGCACGTGATTGAGAGAGACACAGA** 10680  
 10681 **GCGGGGTGCTTCAGATAAATTGGTAAATATAATTTTTTATTCAAGTATATGAGAACCTTT** 10740  
 10741 **AAATTGCTATTGTTTCTACATTGGCAGATGTATTAGAAATGTATTAATTTCTAAAAAGAT** 10800  
 10801 **GACATTAATAGACATTTATCTGATATTAATAATTTCAATTACCTTTTTAATGGTCTTGC** 10860  
 10861 **ATTGATTGTAGGATATACTCTGGTAAAGTTAAGATTTGAACATAAAAAGTATTCTTAGTC** 10920  
 10921 **ATTTAGAGATATTTATTCATGCCTTTCTGTATCTGTGAAATAAAGAAAATATTTTTACAA** 10980  
 10981 **TAAACTGACTGGTTTATTTATGCATGATGTGCTGCAAGAATTAAGGTTAATAAAAAATT** 11040  
 11041 **TCTGTGGTAGATTTCGAACACACCTCTGAAAGTAACTTTTTGTCTCAAGGCAGAAAGGGT** 11100  
 11101 **AGGGAAATAGAAGTGGAAGTGGGATATTTATCCAGGCAGGATTCCTGGTTTTAAATTC** 11160  
 11161 **TGCTAAGGGTAGAAGCCTCAATACTTCCATTCAAATTTACCACA** 11205

>ERV-Spuma-Smu

5' -LTR

1 TGTTACAGGCCTCAGTAGAAGTTAAGGTTAATGACTATTACAAGTCTAAGTAGAAGTTAA 60

61 GGTTAAGGATTTAACTACGCAGTACTAGTAGTTTCTGTTCCATAAGATTTTTTATGTTT 120

121 TAAAGATTAGAATGTTTTGGTTATTCTGTAAAAATGATCAACAGCTTGGCCTTGGTGATT 180

181 TTCTCTCCTGATTTTCTTCTGAGTTTTTATGACCGTTAGTACTCTTTTTGAGGTAGCG 240

241 ATACGCAGGTCTAGTTACAAAATCTTATATATATGCAGACCTTTGTTTATACTCTGGGGC 300

301 AGACCGAGAGACTGAAGCTAGACTTCATATCGAGACTGACTGGTATGTTTATTTTTATT 360

361 TTTATGCATATAAGTTTTAACAGGCATTCTATGTTATACTCTGTTTTAATTTGGATTCC 420

421 TGTAATTTTTATTATTTTTCAATAAATAATTACTATGATGAATTCTCAGTCCTTCTTAT 480

481 AATTGTGCTCACGATTTTCTATTGAATGTGAGACCTATCCACATGTATAAAATTGAAA 540

541 TTTGGTAACTTATCACTTAGGGTGGAGAATAACCTTATTTTAAGACATTACATGGGAGGA 600

601 AAGGTGTGAACCCATCACAATTGGCGCCCAACGTGGGGCTCGAGAATTCTAATTTTTTTA 660

661 TATTACCCAGATATATTTTATACCGCGTCTCTTATACGTAAGGGAAGGTACTCTCAAT 720  
|→ Gag ORF start

721 ATCATGGCGAATAATTTTGTGATATACAGCGATTAAATTCATTGTGCAGATTGCAACAA 780  
M A N N F A D I Q R L N S L C R L Q Q

781 GGCAGAGATGTGAAAATGATGAAGTTTTAGCACTTGAAATACAGTATGGTCCCTGGGGA 840  
G R D V Q N D E V L A L E I Q Y G P W G

841 TCAGGAGCTAGATACTGCTTAATCCGTGTATTGTTGTTAGGACCAAATGGAGTTGTTTTG 900  
S G A R Y C L I R V L L L G P N G V V L

901 CAAACACCTATGTTTGAGTTTGAGGATATTGATTTTAAACCCTGCCAGGCATACCATTGTT 960  
Q T P M F E F E D I D F N P A R H T I V

961 AATCTGATCTATGATGAAAGTCAGATCATTTTGGGAAGAGTCCCAGTAATCCCAAATAGT 1020  
N L I Y D E S Q I I L G R V P V I P N S

1021 CTTCGAGACATGGACCATATGTCCAGAGTGAGAGGTGGGGTACACCCCGTTCTAAATTA 1080  
L R R H G P Y V Q S E R W G T P R S K L

1081 TATTCACCAGTGAAGAGGGGAGGAATTACCTCCACTGGCGGCTACTCTTCAACTAGAGAGA 1140  
Y S P V K R E E L P P L A A T L Q L E R

1141 GAACAGTTATTAAGAGAACTGAATCTAGTCACTGCCACTTTAGAGCAGATATTAATTAGA 1200  
E Q L L R E L N L V T A T L E Q I L I R

1201 GGAGCTTCAAATGTTTCTCAGTTTTTATTACAGACTACAGGAGGAATTCCTATGTCTAAC 1260  
G A S N V S Q F S L Q T T G G I P M S N

1261 ATTAAGCAACTGTGGGTCAGGTTCCCTCAAATACTAAGGAGATTCCCCTATGGCTTAAT 1320  
**Gag\_spuma super family (c126624)**  
**I K A T V G Q V P S N T K E I P L W L N**

1321 GACAGAATACATGCATTAGATGGGGTATTTCTACACCTACACCTGCACAGAAAGAAGCC 1380  
**D R I H A L D G V F P T P T P A Q K E A**

1381 TTAATTAATGCTTTGTTACCTCCTGGTTTGTCTGTTACTCCAGGAAGCTAAAGATTGG 1440  
**L I N A L L P P G L S V T L Q E A K D W**

1441 AATTCTATAGTGAGTACTTTGTATGAAAAGACTCATGAAAAGTTACCTTGGCTTCTTTA 1500  
**N S I V S T L Y E K T H G K V T L A S L**

1501 GCGGACACATTAACACAAGTTCACAAGTCCAGTGGCATTGTTGCAGCATATTCTTTGGGA 1560  
**A D T L T Q V H K S S G I V A A Y S L G**

1561 TTGAGATTCACTCAAATAATCATGAGATAGTTTGGGGTTGTTTAAAGTCCCTTATAAGG 1620  
**L R F T Q N N H E I V W G C L K S L I R**

1621 GGACAAGGACTTATATTAGATTTAGAAAAGACAAATTGAAAGACTTCCTAAAGAGGAACGT 1680  
**G Q G L I L D L E R Q I E R L P K E E R**

1681 TGTGAAAAGTCCCAGAYGTTTTAAAAATACTTATATTCTTTTAGGTAAGGATTTAACT 1740  
**C E K V P D V L K N T Y I L L G K D L T**

1741 GGTGAAGGGGCGAGCCAGTAATAGACAGAAGGCAGACGAAAAAAGAAAAAGTGTTCAGTTT 1800  
**G E G A A S N R Q K A D E K R K S V Q F**

1801 CGCGCTAGACAGTCTGACTCACGCAGGCATGCAAGGTCACAGCTTCAAGCAGTACACAGG 1860  
**R A R Q S D S R R H A R S Q L Q A V H R**

1861 GAAGTGACTGAGAATCAGCGTAGAAGGGAAGCTCCATCTAGACCAGTGACTGAGGAATTA 1920  
**E V T E N Q R R R E A P S R P V T E E L**

1921 AGGAGGCAGGAACCCCAAAATCGATATGCCTTGCGCCCTTTCATTTCGTACCCCTGATAGA 1980  
**R R Q E P Q N R Y A L R P F I R T P D R**

1981 TATGGGCAGCCTCGCCAAGATGCGCGACCAAGAGAGAGATCCCAAATTGCTTCGTCTAAC 2040  
**Y G Q P R Q D A R P R E R S Q I A S S N**

2041 AGATTTTCTGAAAGGGAGGGCAGAGTAGAAGAAAGGGTTACAGCATCTGCAGCTACATCT 2100  
**R F S E R E G R V E E R V T A S A A T S**

2101 GCAGCTACACCCGCCCACTAAAAAGGTAATAAGATAAAGAGAACCTCAGATTCTCCT 2160  
**A A T P A A T K K V N K I K R T S D S P**

Gag ORF end ←|

|→ Pol ORF start

2161 GCACCAGAGTCTGTAGAAAAAATAATGAGCAGTAAATGGAGAGTTTAAAATTACAAAT 2220  
**A P E S V E K T N E Q \***

**M S S K M E S L K L Q I**

2221 ACTGTACAAAGACAATTTTTATACTGGACTTCTTGACACACAAGCAGACATTTTCATTAGT 2280  
**Underline: Spuma\_A9PTase super family (c108397)**

**L Y K D N F Y I G L L D I Q A D I S L V**

2281 ACAACCAAATATTTTACAGGAAGAAATGTTACATTATGTTTCTGTACAACTTTAGAAGG 2340  
**Q P N I L Q E E M L H Y V S V Q I L E G**

2341 AGAAGGGTCATACCCATCTTTTTATACAAATTTAAAGATAAATGGAAAATGTGTTTCTTT 2400  
**E G S Y P S F Y I N L K I N G K C V S L**

2401 AGAATTGGTTGAACATCCTAATTTAGATACACAGTTTCTTATTGCTTTTAAAGATGTAGC 2460

2461 **E L V E H P N L D T Q F L I A F K D V A** 2520  
TCATTTTATTCAGATAACTCAGAGTACAGAAACACAAATACCTGATTTAACAATTAAGT  
**H E I Q I I Q S I E I Q I P D L I I K V**  
2521 AGATGTTGGATTTCTTATAGAACAACAAATAGCTCAATCTATTGTAGAGAATAAAGATAA 2580  
**D V G F L I E Q Q I A Q S I V E N K D K**  
2581 ATTGGCTTTATGTCTTTGTGATCATTTTCAGGTATTCCAGCAATGGGAAAATCAAGCAGG 2640  
**L A L C L C D H F Q V F Q Q W E N Q A G**  
2641 ATATAGGAGAGAGATTCTCCATCATATTGCTACGGGAACTGTTACTCCAAAGCGTCAGTC 2700  
**Y R R E I L H H I A I G I V I P K R Q S**  
2701 CCAGTATAAGATTAATCATGCCGCAATACCTAGTATTCAAATAGTGATAGATGATCTTGT 2760  
**RT\_like super family (c102808)**

**Q Y K I N H A A I P S I Q I V I D D L V**  
2761 TAAACAAGGGATCATTAAAGAACAGTATAGTCAAATGAATACTGCTGTTTATCCTGTACC 2820  
**K Q G I I K E Q Y S Q M N T A V Y P V P**  
2821 CAAACCAAATGGTAGTTGGAGATTGGTGTAGATTACAGGGAAGTAAATAAGGTAACCTCC 2880  
**K P N G S W R L V L D Y R E V N K V T P**  
2881 CGTAGTTTCTGCTCAAAACACACATTCTGTTTCAATTTTACACGGCTTAGTCCGGAAAAG 2940  
**V V S A Q N T H S V S I L H G L V R K R**  
2941 GTTTAAACAACATTGGATCTTGCTAATGGTTTTTGGAGTCACCCCATTGATACAGATAG 3000  
**F K T T L D L A N G F W S H P I D T D S**  
3001 TTATTGGATTACAGCTTTTACTTGGCAAGGGAAGCAATATGTGTGGACTCGGCTCCCACA 3060  
**Y W I T A F T W Q G K Q Y V W T R L P Q**  
3061 AGGGTTTGTTAACTCCCCAGCTTTGTTTACAGCCGATGTAGTATCATTATTATCTGCATT 3120  
**G F V N S P A L F T A D V V S L L S A F**  
3121 TTCTAATATTGAGGTGTATGTTGATGATATTACTTATCCCATGATAGTGAAGAGGAACA 3180  
**S N I E V Y V D D I Y L S H D S E E E H**  
3181 TATTGCAGTTCTTACACAAGTCCTAGATACCTTGATAAAGCAGGATACATAGTGTCTCT 3240  
**I A V L T Q V L D T L Y K A G Y I V S L**  
3241 AAAGAAATCACAGATCGCACGTAACAAGTTACTTTTCTGGGGTTTGACATTACACATAA 3300  
**K K S Q I A R N K V T F L G F D I T H N**  
3301 TGGCAGAGGATTGTCTGATAATTACAAAGAAAAAATTGCTGCAATTAAGACCATGTAG 3360  
**G R G L S D N Y K E K I A A I K R P C S**  
3361 TTTAAAACAATTACGCAGCATTATTGGACTTTTTAATTATGCAATGTTGTTTATTCCAAA 3420  
**L K Q L R S I I G L F N Y A M L F I P N**  
3421 TTTTAATATTTTAATAGCACCATTACATGCTGCTGTTTACAGAGAAATAAGATCACAACA 3480  
**F N I L I A P L H A A V S R E I R S Q Q**  
3481 AACTAAAACCCCCTTTTCAGTGAATATGAAGGAGGAAAAAGCTTTACAAGATTTGTTGAC 3540

**RT\_RNaseH\_2 super family (c139038)**

**T K T P F Q W N M K E E K A L Q D L L T**  
3541 AGCTGTAAATAATGATTATTTAACACAAAGAGAGCCTACACAACCGCTATCTGTTTATGT 3600  
**A V N N D Y L T Q R E P T Q P L S V Y V**  
3601 TAGTATTTCTTCTGAGGCAGCATATATACGTATTTACAATTCTGCTGAAATTGTTCCGAT 3660  
**S I S S E A A Y I R I Y N S A E I V P I**  
3661 TGACTTTTATCCTATGTATTTACAATTACAGAAAGAAAATACTTGCCGTTAGAGAAGTT 3720

V L L S Y V F T I T E R K Y L P L E K L  
3721 ACTTACTGCGGTGACGGTAGCTGTGTTGAAGTCTAGAGACTTAGCTCAAGGTCAGAATAT 3780  
L T A V T V A V L K S R D L A Q G Q N I  
3781 TTATATTTATACTTCTGTTGCTTCACTCGCAACTTTAAAAAAGAAACAATCCCTGAAAA 3840  
Y I Y T S V A S L A T L K K E T I P E K  
3841 AAGGGCTTTTAAATGTCGATGGTTAAAGTGGTTAACTTTATTCTGAAGACCCCGCTTAA 3900  
R A F K C R W L K W L T L F E D P Q L N  
3901 TTTTGTGTATGATGCTACGTTACCCATGTTGGATGATCTTCCAACATTGTATAATAGTGT 3960  
F V Y D A T L P M L D D L P T L Y N S V  
3961 CCAGTGGAAGCACAAAAGCATCCAAGTATTCTATACTTATCTATATTACACAGATGG 4020  
Q W E A Q K H P T D F Y T Y L Y Y T D G  
4021 TTCAGCAGTTAACTCTAACAAGGAAGGAGTTAATAGATCTGCGGGGGTAGGCATTGCTAA 4080

**RNase\_H\_like super family (c114782)**

S A V N S N K E G V N R S A G V G I A K  
4081 ATACTCCTCGGATATGAGTTTGTAAAACTTGGCAGCTCCCGATAGGAGATCATTGCTC 4140  
Y S S D M S L L K T W Q L P I G D H S S  
4141 ACAATATGCTGAGATATATGCATTGGTTTTTGCATTAAAAGAAGCTTTAAGTGATAAGGG 4200  
Q Y A E I Y A L V F A L K E A L S D K G  
4201 TCCTGTTCTTGTGTTACTGATTCTGCTTATTTAGCACGATCTGCTAATGAAGATCTTCG 4260  
P V L V V T D S A Y L A R S A N E D L R  
4261 TATATGGAGATCAAATGGTTTTCTCACGGCTAAAAAGAAGCCGTTAATGCACATTGCTAA 4320  
I W R S N G F L T A K K K P L M H I A K  
4321 ATGGAAGCAATTTCTGCTTATCTCAATTATAAGCCTGATATTGAAATTGTACATGAACC 4380  
W K A I S A Y L N Y K P D I E I V H E P  
4381 GGCTCATAGGAAGCTTGGTTCGTCTGCTCACACACTGGGTAATCAGCTTGTGATTCTCT 4440  
A H R K L G S S A H T L G N Q L V D S L  
4441 CGCACAAGCTGTTAGTCAAAAATATGCTGTGAACCAAGTTAAAACCAGGTCACAAGCAAA 4500  
A Q A V S Q K Y A V N Q V K T R S Q A K  
4501 ACCAGCCAGTCTCGATGCAGAGTTGAATGCCTGTTTGGATGATTCCAGACCTAATCCACC 4560  
P A S L D A E L N A C L D D S R P N P P  
4561 TGGATATCCAAGAATATATGCATATAAAGTGCAAGATGAACACTGTATTGTCACTATTAA 4620  
G Y P R I Y A Y K V Q D E H C I V T I K  
4621 GGAAGTTGATTATATCCTTCCACCTAAAGAAGAAAGGGTCCGAATTGCCAATAAAGCACA 4680

**Integrase\_H2C2 (pfam17921)**

E V D Y I L P P K E E R V R I A N K A H  
4681 TGCAAGTATTGGTCATCCACATTTGGGACGTGACAATGTTCTTCAAGCACTTAAGAAAAA 4740  
A S I G H P H L G R D N V L Q A L K K K  
4741 ATATTGGTGGCCTAATATGAGAAAAACGGTGTGATATGTGGTAGGTAATTGTAAACCATG 4800  
Y W W P N M R K T V S Y V V G N C K P C  
4801 TTTGTTAGTTAATAATCCTAACCATCAAAAGCCACCACATATTGTTAAAGAAATTCCTAA 4860  
L L V N N P N H Q K P P H I V K E I P N  
4861 CAAACCTTTTGTATCTAATTTATCTTGATCATATTGGTCCACTGCCACCTTCTCATGGTTA 4920

**rve (pfam00665)**

K P F D L I Y L D H I G P L P P S H G Y

4921 CCTATATGTGTTAGTATGTGTTGATGCCTGTACTAGGTTTACTTGGTTGTACCCCGTACG 4980  
 L Y V L V C V D A C T R F T W L Y P V R  
 4981 TGCTACGAATTCTAACACCACGCTTAGTTGTCTCAATTTTTTGGTAGGTGCTGGAAAACC 5040  
 A T N S N T T L S C L N F L V G A G K P  
 5041 AAAGATCTTACACTCGGACGGCGGTCCGGCTTTCACGGCTGTGAAAACCCAAGAGTGGGC 5100  
 K I L H S D G G P A F T A V K T Q E W A  
 5101 TCATGCCCTAGGTATTAATGGGAATTCAGTCCCCTTACCATCCTCAAAGTAGTGGGGT 5160  
 H A L G I K W E F S S P Y H P Q S S G V  
 5161 TGTGAAAGGAAAAATGCCGAAATAAACGACTCCTAACCAAGTTGTTGTATTCTCGTCC 5220  
 V E R K N A E I K R L L T K L L Y S R P  
 5221 CACACAGTGGTACCCATTGTTACCTCAGGTACAAC TAGGTATTAACAATATTCTGCTTC 5280  
 T Q W Y P L L P Q V Q L G I N N I P A S  
 5281 AAATTCAGGTA AACACCTTTTGAATTGATGTATGGTGTCCAATGAATACTGATTTTGT 5340  
 N S G K T P F E L M Y G V P M N T D F V  
 5341 TGA CTCTTCTATTTCTGCACCAGGGAGACTAGAACAATTATCTTTTCTACAGGAGTTGCG 5400  
 D S S I S A P G R L E Q L S F L Q E L R  
 5401 AGACGCTTTGTCTCACCTGCGTACGCACCAGATACCACACATGCATGGACTCCACAGGT 5460  
 D A L S H P A Y A P D T T H A W T P Q V  
 5461 TGGCCATTTTGTCCAGGAGAGGGTATCTACTATAAAGCCCTTACGACCACGTTGGAAGCC 5520  
**SH3\_11 super family (c139492)**  
 G H F V Q E R V S T I K P L R P R W K P  
 5521 TCCAGCAGAGATTA AAACTGTTATTAATGAACGGACTTTTATTATAGTTGATAAACAAGG 5580  
 P A E I K T V I N E R T F I I V D K Q G  
 5581 CCGTCAAAGA ACTGTGAGTATTGACAATTTAAACCTGTTCTTTATCTGTGATATTCA 5640  
 R Q R T V S I D N L K P V P L S C D I Q  
 |→ Env ORF start  
 5641 GCATGGAGGAGAAACCACCTCTA ACTTACTCTCAATGGCTGACCATGGCAAATGTGCAGA 5700  
 H G G E T T S N L L S M A D H G K C A D  
 M E E K P P L T Y S Q W L T M A N V Q  
 Po1 ORF end ←|  
 5701 CGCAGGAAAACCAGCAGGACATTTTGT TGAATATCAATCGTGTGCCACAGAAGATGTGC 5760  
 A G K P A G H F V \*  
 T Q E N Q Q D I L F E Y Q S C A T E D V  
 5761 AGACATCAGGTGAGAAAGAGACTTTCATTGATATACTGATTGCACTAAAATGCCTTCTT 5820  
 Q T S G E K E T F I D I P D C T K M P S  
 5821 TGAAGCAAAAACATGTCTGTGGATTTTGAATAAGACCCAGTAAGTTTGAGAAA ACTGG 5880  
 L K Q K H V C G F C N K T P V S L R K L  
 5881 GTTACTTTTTTCTTGCA TTTTTCATCCTGTTGTTGTTAATAACTACAATCGGTGTTGCAA 5940  
 G Y F F L A F F I L L L L I T T I G V A  
 5941 TTTTTCGCATT CAGTGGTATTTTATCACACAACGTCTCGGAATCACCTGACATGGAATC 6000  
**Foamy\_virus\_ENV super family (c104051)**  
 I F R I Q W Y F I T Q R P G I T L T W N  
 6001 AGACCAAATTCATCCAGGTATTGGGAATGCTAAACATGTACATAAAAGAGCTTTGATGT 6060  
 Q T Q I H P G I G N A K H V H K R A L M

6061 CTAATAATGTTCTGTGAGTGTACAGGTACAGGACTGGAACAAGGTCTGTACTGGAAGC 6120  
S N N V P V S V Q V T G L E Q G L Y W K  
6121 CATATCCAACGCCTATTGTGGAGAAGAAGAAAGTCTGGGTATATCCAAGTGGTACTTA 6180  
P Y P T P I V E K K K V L G I S Q V V L  
6181 TAGACTCTAATATTCTTGCAAAAACAGCTGGAATTGTTTCTGATGAAGGACGTGCTCTGG 6240  
I D S N I L A K T A G I V S D E G R A L  
6241 TAAAGTTATACCTAGATGACCAGATGAAAAAGGTACAAGCTGTTACCCTGCCATATAAGT 6300  
V K L Y L D D Q M K K V Q A V T L P Y K  
6301 TGCCTTTACAGGACCACCGGAAACAACAAACATATAGAGAAAAGATGTGTTATGTTTCTC 6360  
L P L Q D H R K Q Q T Y R E K M C Y V S  
6361 TTGGACATTGTTATTTTGTGGATTTTCAAGGCGTAAGAATCTGGCCAACACCGGAAATAA 6420  
L G H C Y F V D F Q G V R I W P T P E I  
6421 AGGCTGATCAGTGTCCYCGTCCAGGTACTACACAGGACAAGGTAACATATAAAGGTTATC 6480  
K A D Q C P R P G T T Q D K V T Y K G Y  
6481 CTATTTTTTATTTGAATACAGGACAAACTACTCAAAAAGGATTTGTCCCCTTCAGAAGGA 6540  
P I F Y L N T G Q T T Q K G F V P F R R  
6541 ATGACACACGTATTGATTTTTGGGAAGATGCAGAAGAGGAGGAATATCGATTTCTGGAG 6600  
N D T R I D F W E D A E E E E Y R F P G  
6601 GTGTAAGACCTTATAAAGGTGCTGTTTTTTGTTCTAATTTGCTTTACTCAGAATGGTGGGA 6660  
G V R P Y K G A V F C S N L L Y S E W W  
6661 AACCGGAATTTTATGATGATGATGGCTATGATGCCTTGATGAAGCAACTACATGTTGAGG 6720  
K P E F Y D D D G Y D A L M K Q L H V E  
6721 TACAAAATCCGGAACGGGTGAATTAAGAGACAGGCATTACCCCCTGAGTGGCAGGCAA 6780  
V Q N P E T G E L K R Q A L P P E W Q A  
6781 AAGGACAGAAAAAGTTATTTTCGAGTCTGACGGAATGGGATATCTGTACAATGCCAAGAT 6840  
K G Q K K L F R S L T E W D I C T M P R  
6841 TTCCCTCGTTTCTGAATACATCGTATTTTAGTCACTCTTGCAAAGCAAAGGTAATCCGT 6900  
F P S F L N T S Y F S H S C K A K G N P  
6901 GCGGTATTACTTACGAAAGTTTGATAGAACAAGGAATATGTGATCCAAACATTCCTCAC 6960  
C G I T Y E S L I E Q G I C D P N I P S  
6961 AGGTTTATAGATGCACTTCTTGTTCAATTTTACAATTTGACTGATAACATTTTCAAGT 7020  
Q V Y R C T S C S F F Y N L T D N I F K  
7021 GGCAGCCTAAACAAATCGACCAAGGATTTTACATTACAGCGGACTTCTGGTTTTTGGT 7080  
W Q P K Q I D Q G F L H Y S G L P G F W  
7081 GCGTGCAGAAATCTAAATTTGTTAAAACAAATTATACGGTTTACTCCCTGTTTCAGAAAT 7140  
C V Q K S K F V K T N Y T V Y S L F Q K  
7141 GTTTGACAGACAGCACCATATATGATGTGAAAAGTGTGATAAAAGGTATACAGGATAAAA 7200  
C L T D S T I Y D V E T V I K G I Q D K  
7201 TGAATGTATATATTGGTACTGATGACAAACCATGTGAGTATATACAGTGTAACAAAAA 7260  
M N V Y I G T D D K P C E Y I Q C K T K  
7261 ATATCGCTGATATGCCATATGCTGAAGCAGTGTGGGAACAAATAACACATTTGCAAATA 7320  
N I A D M P Y A E A V W G T N N T F A N  
7321 TACATTATCAAAAACATTACAAAAAAGTGATGAATGTGAAAATGTTTTGTTAACGA 7380  
I H Y Q N N I T Q K S D E C E N V L L T





8641 CTAAAGGTAACAAGTTCTGAAGAAG**ATGA**ATGCTGCAGCTTTTGACAGGCTCATTAGAAA 8700  
**P K G K Q V R R R \***  
**M N A A A F D R L I R N**

8701 CATTTTTAATACACCTGTTTTAACTTCCAGGATACTGGTGGATGTGTGGACACACTTCT 8760  
**I F N T P V L T S R I L V D V W T H F L**

8761 GTTGGGTGTGGAAGTTAGAAAGAATCAAGATGTAGTAACGTATGACCTGTCTTACCGTTG 8820  
**L G V E V R K N Q D V V T Y D L S Y R C**

8821 CGAGATATGTAACACCAAATAAGTGACGTTAATAATCCTTATGTGTTTGATGATCTTGT 8880  
**E I C N T K I S D V N N P Y V F D D L V**

8881 AGGATTAGTCGTAATCCCATGATATCACAGAGATATTGGGACATTCTTTGGAATCATT 8940  
**G L V V I P M I S Q R Y W D I L W N H Y**  
**| → Acc2 ORF start**

8941 TAGTCACTGCA**ATG**ATACATCCTCACAAACCGAATTGCAAAGCCTCCCACAGAGTCC 9000  
**S H C N D T S S Q Q T E L Q S L P Q S P**  
**M I H P H N K R N C K A S H R V**

9001 CACGGAGACAGAATCTCAAGGTTCAAGGAGACAACAGAGTACTCATATCTACAACGTCTC 9060  
**T E T E S Q G S G D N R V L I S T T V S**  
**P R R Q N L K V Q E I T E Y S Y L Q L S**

9061 CAGCGGTGAACAAGATACAGACGCCAGTGAATATGAAAGATTTTCTATATCACCTCCCAT 9120  
**S G E Q D T D A S E Y E R F S I S P P I**  
**P A V N K I Q T P V N M K D F L Y H L P**

9121 TACAATCAGTGGGTCCGTTACTGATTCTGACACCGAAGGGAACTTTACTTTGAGGAATC 9180  
**T I S G S V T D S D T E G N F T F E E S**  
**L Q S V G P L L I L I P K G I L L S R N**  
**Acc1 ORF end ← |**

9181 TCAAGACCAATTACATTTTTYTGCAACTCATGGGTTTCGAGGAATTTTT**TAA**TCCATCGT 9240  
**Q D Q L H F L A T H G F E E F F \***  
**L K T N Y I F W Q L M G S R N F S N P S**

9241 TCTTTGAATGCGTCAATAAAGACAAACAAATTTTCCAATTGATATTACAACTAAACAAG 9300  
**F F E C V N K D K Q I F Q L I L Q T K Q**

9301 AAGGACTTCTTAATATTGTAAGCCATGGAACTTTGGTTGCACAGTTTTGCTTGCTTGCA 9360  
**E G L L N I V S H G I F G C I V L L A C**

9361 ATGGACCTCCTCATGAGACTTGTGTTGGTGGGATATGGAGAAATACTTTGTTGCATCTGT 9420  
**N G P P H E T C E G G I W R N T L L H L**

9421 ATACAGAGTCTTATGCATTTTCAGTTGGGTGATTTTTATCAATTGCAGAGTTCTCATGAAA 9480  
**Y T E S Y A F Q L G D F Y Q L Q S S H E**

9481 ATATAACTTGTGATCATGTATGGTGTTCACATTGTAATGTTTTGTGTTTCATGAAATCG 9540  
**N I T C D H V W C S H C K C F V F H E I**  
**Acc2 ORF end ← |**

9541 CGGAAACACCTTTCTTTTTCTTTTCCACCAATAGATTTAGAATGTGG**TGA**TTCTAATTTT 9600  
**A E T P F F F F I N R F R M W \***

9601 GTTGATTAATTTAAGTTAATGTTATTAGCTGGACCAAGTAATCATAATTTTTTTGCCCA 9660  
**3' -LTR**

9661 GCTAATGGAGAGGGAC**TGTTACAGGCCTCAGTAGAAGTTAAGGTTAATGACTATTACAAG** 9720

|       |                                                               |       |
|-------|---------------------------------------------------------------|-------|
| 9721  | TCTAAGTAGAAGTTAAGGTTAAGGATTTAACTACGCAGTACTAGTAGTTTCTGTTACATA  | 9780  |
| 9781  | AGATTTTTTTATGTTTTAAAGATTAGAATGTTTTGGTTATTCTGTAAAAATGATCAACAG  | 9840  |
| 9841  | CTTGGCCTTGGTGATTTTCCTCTCCTGATTTTCTTCTGAGTTTTTTTTATGACCGTTAGTA | 9900  |
| 9901  | CTCTTTTTGAGGTAGCGATACGCAGGTCTAGTTACAAAATCTTATATATATGCAGACCTT  | 9960  |
| 9961  | TGTTTATACTCTGGGGCAGACCGAGAGACTGAAGCTAGACTTCATATCGAGACTGACTGG  | 10020 |
| 10021 | TATGTTTATTTTTATTTTTATGCATATAAGTTTTAACAGGCATTCTATGTTATACTCTG   | 10080 |
| 10081 | TTTTAATTTTGGATTCCTGTAATTTTTATTATTTTCAATAAATAATTACTATGATGAAT   | 10140 |
| 10141 | TCTCAGTCCTTTCTTATAATTGTGCTCACGATTTTCATCTATTGAATGTGAGACCTATCCA | 10200 |
| 10201 | CATGTATAAAATTGAAATTTGGTAACTTATCACTTAGGGTGGAGAATAACCTCTTTTTAA  | 10260 |
| 10261 | GACATTACATGGGAGGAAAGGTGTGAACCCATCACA                          | 10296 |

>ERV-Spuma . a -Ame

5' -LTR

|      |                                                                |      |
|------|----------------------------------------------------------------|------|
| 1    | TGTCATGATTTACAAAGGTTACAAACGAGTTAAGGCAGGTGTGCCACAGACTTCCTAACC   | 60   |
| 61   | ACAGATTAGCAGCCGTTGGTCTTCAACGRCTTAATGCCTTGAAAATACACGTGGTCTTGA   | 120  |
| 121  | CACCATCATAGTAATAAGCTATGGATGTTCTTTGGGCAAAAAACACTCATTACACACAAA   | 180  |
| 181  | TGCAAGTGTGGCTTTCAAGAGACAGAATCGGACACTAACTGTAAACCCACAGGCACCTTGC  | 240  |
| 241  | CCTTAGGGTCAGCTAAAGGGGAACAGTTTCTCCTTAAGCCAGCCACAAGTATCAGCTTC    | 300  |
| 301  | CTGTGTTAGATGGRCTCGTAGCAGAAAGCAGCCATAGACAGGAAGCAGGGTACCAGAATA   | 360  |
| 361  | CATGTGTGGTTAAAGCGTCAAAGCAATAGTCACATTTAAACCCCTTCAGAAAACGCATT    | 420  |
| 421  | CAATATAATGGCATTTCGAAGTAGGCCAGAAAAAATACAGCACCTTGCCTGTTCTTCGAGC  | 480  |
| 481  | GGAAGGCCATGCATTTCAATGGAATAATCAAGAAGCAAGGACATCACCTTTCACCTGGG    | 540  |
| 541  | TTCTCACATAGGTAAATAATGTGTGCACTGCAAACCGAAGTATAAGAGCAGATTACAGACT  | 600  |
| 601  | CTAGACTTTCTCTCCAGATCGAGGAAGTGACGCACATAGTACATGTAGGCTAAGTCACGG   | 660  |
| 661  | GTGTTAATATAAAAAGCACAAACAGACTAAGGCTDAGCGAGATTCCCAGCAGGCAGCAGGCA | 720  |
| 721  | GACCAHAAGATYGTGGGGGGTGGGAAGAGCADKYGMTAGCAGGTCGGAGCAGCAAGCCC    | 780  |
| 781  | WGGATACCGTGAGTTTTAAGTGTGTTGGTTGAACCTCTYTTGCATATGTTAGACTGACGG   | 840  |
| 841  | CGTGTTTTATTATGTCACTCCACTCCTGATCATACCATAGTATAGCTTAGACAAACATAA   | 900  |
| 901  | CATGAACTCCATGATTGCTCAAGCTGGTGTTCAAAATGATGAATTGACTTTATCTTTG     | 960  |
| 961  | TTAAATGCAAATCATGCTTATAGCTTATGCAACAATGCTTTTTCTCTATCTGACAGTATG   | 1020 |
| 1021 | CTATGTTTTTACTGCGTTAATTATAGCAGGTGTAATGATGATCAAAGCTGGTAGAGAACA   | 1080 |
| 1081 | GAAGTGATATTAATATATTGACTTGCTACCTTCAAGTGTGAGCTTCATATTTCTGAGTA    | 1140 |
| 1141 | ATGCTTCATAATGAGGTCTCTYTGAGTCAAAASGAACTACACAATATTTCTGGCTGTAT    | 1200 |
| 1201 | TTTGGTCAATTATGTCAAGGGGTGCAAACACTCAGGGAACTGTCAAAGCGCTAGGCCAA    | 1260 |

1261 ACCCCTGAGGCGCCTCTCATATAAATTAAGACTTTTGATTCTGTGCCCACTCCACACAG 1320

1321 CCCTACCTAGGGTSGAGGGRGGGGGCAGGAATCACGCCCTAAGGGGCAATCAAGTCAGA 1380

1381 TGGCACCCCAAMAGATGGGACGTCTTAGAGATGACCAGAGCATTACTAATATTTAAATA 1440  
|→ Gag ORF start

1441 ACCTC**ATG**TCCCAGTCACGGGAGAAGGACAGGGCAGAAWTTTTTTTTTCTAAAAASGTTT 1500  
M S Q S R E K D R A E X F F S K X V

1501 TTTTAAATAAGAGGTTAGAGTGCCTACAGAAGATGGCGCACAATGAAATCAATATTTCCA 1560  
F L N K R L E C V Q K M A H N E I N I P

1561 TCCATTGCAGAATGGCTCTATATGATTGGCTGAGAGCTGCGCACTGTCATGCAGTGAACA 1620  
I H C R M A L Y D W L R A A H C H A V N

1621 CAAATTTACAGTAGCAGTGGCGCAACTTGGTGGACTACCAGCAGAATCACTCTTTACTT 1680  
T N F T V A V A Q L G G L P A E S L F T

1681 ACTTAAAGACCCAGCTAACAGGACAAATAATGTATATGCAACTCTCCTAGTGAGRGGAG 1740  
Y L K T P A N R T N N V Y A T L L V R G

1741 ACTTAGACACCATTTCAGTATCGCCATACAGTATCCTGAATTGGCTTTAACACATACAA 1800  
D L D T I Q Y R P Y Q Y P E L A L T H T

1801 ATCATGTCAACTGGTTTGGAGGTAATCTAGTTTACCCACAAACAGGTGCAAGGCATGGCC 1860  
N H V N W F G G N L V Y P Q T G A R H G

1861 CATTAGCTACACCAATCTGTCACTAGAATTCTTAGCCCGTTTCATCCAAACCGTGGAG 1920  
P L A T P N L S L E F L A R F H P N R G

1921 GTCCATTTTTGCAGGCTGACTACCAATTGTTAGCCACCCACTTTGACACAGTGCAGAAACA 1980  
G P F L Q A D Y Q L L A T H F D T V R N

1981 TTGCGCTGCAATATGCAGCTCAGCAGGTATAGCACCTGCGCAGCAACCTCAAGGACAGA 2040  
I A L Q Y A A Q Q G I A P A Q Q P Q G Q

2041 TGGATGCAGGTGGGGTACAACACTACAGACATTGAGAATAATATTGGGATCCTGTCCATCCA 2100  
**Gag\_spuma super family (c126624)**  
M D A G G V Q L Q T L R I I L G S C P S

2101 AGAATGAAGACATTCCAAGTGGTATTAGAAAAATTAGGACAATTGCAAGCTGCTTATC 2160  
K N E D I P K W Y S E K L G Q L Q A A Y

2161 CACAAGTAACTCCCAGCACAGACACAGGGCCCTAGCTATGTTTCTTCCATCTGGCTGCA 2220  
P Q V T P Q H R H R A L A M F L P S G C

2221 CACCGCCTCTAGCGAGCTGTGACAGCTGGATCTCAATCTATAGCTGGCTTTATTTACAGC 2280  
T P P L A S C D S W I S I Y S W L Y L Q

2281 TGATAGGCACGCCGTCCATCACATCACTAGCACTGATACTAGCTGACATCATGGGAACAC 2340  
L I G T P S I T S L A L I L A D I M G T

2341 AAGGCGCGCCGAGCCATGAATCTAGGCCTGTCTATAGCATCTAACAATTATCAATGG 2400  
Q G A A A A M N L G L S I A S N N Y Q M

2401 TTGAGAGCATAATCCTACCCTTATTAAGGAGAGCCTGCAAGGTTAGAAGTCCATAGAA 2460  
V E S I I L P L L K G E P A R L E V H R

2461 AATTGTCCCAATTAATGAGCAAGAAAAAAGGGAGCAATTTGGAGACATAGTGACATCCA 2520  
K L S Q L N E Q E K R E Q F G D I V T S

2521 CCTATCAATCATTGGGCAGGGATCACTTGGGCAGAAGACCAGCAGACACACAGAAAAAGG 2580

T Y Q S L G R D H L G R R P A D T Q K K  
 2581 GTAACAAGGATCTTAAGCCAGATAAAGGACACACACCATGAAGGGAGATCCTCGAAAGGAC 2640  
 G N K D L K P D K D T H H E G R S S K G  
 2641 GGGGATCATTCCAGGGTAAAAAGGGCAATAAGCCACAGAGGGCGCAATTGTCACCCATAG 2700  
 R G S F Q G K K G N K P Q R R Q L S P I  
 2701 AGGAAGAAAGATATCCAGAGCATGGGCATAAAAAATGAGAAATCTGCAGGAGATAGGCAGA 2760  
 E E E R Y P E H G H K N E K S A G D R Q  
 2761 GCCCGCAGTGGCAAGGTAACCACAGGGGTAGACGGTCCTGGGGTAAGACCGGGGGCCAGT 2820  
 S P Q W Q G N H R G R R S W G K T G G Q  
 2821 CCCATTTTAGACCTACTGACTATGATTTTAGAGACAGGAAACACATGAAAAGTCCCCAGA 2880  
 S H F R P T D Y D F R D R K H M K S P Q  
 2881 AGTACGGCACTGATGAGACTTCATCTCCTTCCCAGCAGGCACGAACACCAGATCGTTCTA 2940  
 K Y G T D E T S S P S Q Q A R T P D R S  
 2941 AGGCTGAGGGGAAGGAAGTGAAGTTGAGAAAAACACACGGCAGCACTACAGTTTCAC 3000  
 K A E G K E V K V E K K H T A A L Q V S

Gag ORF end ←|

|→ Pol ORF start

3001 AGA**ATG**CAGAGTCCACGCACTCATCGCATCGTTCCCAAGACT**TAAG**CGACACACTGATTGG 3060  
 Q N A E S T H S S H R S Q D \*  
 M Q S P R T H R I V P K T K R H T D W  
 3061 ATTGAGGTCTATTAGACTCTGGGTCTGACATTTCCATATTTGAATGCAGCCACAAGGCA 3120  
 I E V L L D S G S D I S I F E C S H K A  
 3121 CTATTGGAGCACACAAGGGCACACAGGAATGCACAGATCACTACTCCCACTGGGCAGACA 3180  
 L L E H T R A H R N A Q I T T P T G Q T  
 3181 TTGGCACATAATGAAGTGTATTTTGTAAACAATTCAGCTAGAAGGCGAACACCCCAAAAAG 3240  
 L A H N E V Y F V T I Q L E G E H P K K  
 3241 ATTGAAGCACTATTTTGGCCACAGCTACACATTCAATATAAAGGGCTGTTAGCATTTCAA 3300  
 I E A L F W P Q L H I Q Y K G L L A F Q  
 3301 GACTGGCCACCTTTGTATGTAAGGCAAGCACCAAGGGGTGAAGAAGTGGTAATGCCTGCC 3360  
 D W P P L Y V R Q A P R G E E V V M P A  
 3361 TTTTCAAAGAGGTGAGTGGGGAATAATGCAAAAATATGCAAGAAAATGGTCAGCGCTG 3420  
 F S K E V S G E L M Q K Y A R K W S A L  
 3421 GCAGCAGTGCAGCTGTTTAAAAATCATGTAGGGCATGATAAAGAATGTCCAGCACATGTG 3480  
 A A V Q L F K N H V G H D K E C P A H V  
 3481 ATTCCAGTGCTGAAACCACCCCGCCACAAAGCAGTATCCAGTTAAACCACAGGCAGTT 3540

RT\_like super family (c102808)

I P V L K P P P P Q R Q Y P V K P Q A V  
 3541 GCCCACATGCAAACCATAGTAGACCAGCTAATGGACCAGGGAGTAATCATAAAGCAAGCT 3600  
 A H M Q T I V D Q L M D Q G V I I K Q A  
 3601 AGCCACATAACAGTCCCKGTGCTCCCAAGTTTAAAAACCTGATGGTACCTACCGTTTTATT 3660  
 S P H N S P V L P V L K P D G T Y R F I  
 3661 GTAGATTTTGAATTTTGAATGCACATTGTAAGACAGAGGCCGTCCAGAACCAACACAGT 3720  
 V D F R I L N A H C K T E A V Q N Q H S  
 3721 TCTGGATTGCTAGCCAACCTTACACAGATGCAAAATATAAAAACAAACCTTGATCTAGGCAAT 3780

S G L L A N L H R C K Y K T N L D L G N  
 3781 GGGTATTTACACAACCTTTAAGTGTAGAAAAGCCAGAAATACACTGCATTACKTTTAAAG 3840  
 G Y F T Q P L S V E S Q K Y T A F T F K  
 3841 GGAACTCATTTCAGTTCACTAGAATAATGCAGGGGTATAAAAATTCACCTAGCACATTC 3900  
 G T H F Q F T R I M Q G Y K N S P S T F  
 3901 TCAAGCAGAATACAGAGCTTACTTGCAGACATTCTAATTGTTGGCAGTATGTAGATGAT 3960  
 S S R I Q S L L A D I P N C W Q Y V D D  
 3961 ATTTACATCACCCATGAGAATCTCAGTGAACACTTGAAGAAGTAGACAGAGTCATTAC 4020  
 I Y I T H E N L S E H L Q E V D R V I H  
 4021 ACGTTGGCTGCAAAAGGATACCTGATTAATTTYAAAAAATCAAGAATAGCTCATCGTGAG 4080  
 T L A A K G Y L I N F K K S R I A H R E  
 4081 GTTACCTTTCTGGGATTCACTCTTTCAGATGAGGGCAGAGGGTTGTCAGCAGATTTTCTT 4140  
 V T F L G F T L S D E G R G L S A D F L  
 4141 GAGAAGTGTGCCAATATAAGACCGCCACTACGCTTAGGCAGTTACAGGCCATTCTAGGG 4200  
 E K C A N I R P P T T L R Q L Q A I L G  
 4201 CTGTTAAATTTTGGCAGATCGTATGTTTCTAATTTTGGCTGAGCTAGTGAAACCATTGTAT 4260  
 L L N F G R S Y V S N F A E L V K P L Y  
 4261 GCTTTGATAAAACCAAATTTCAAGGCAGCTCACTGGCTGCCAGAACACACTCATATTCTG 4320  
 A L I K P N F K A A H W L P E H T H I L  
 4321 CACCAGGTATATTCATTAATGACTCACACTGGTCCCTTTGCAGGACAGGAATACAGATAAA 4380  
 H Q V Y S L M T H T G P L Q D R N T D K  
 4381 GACTTAGAGATAAACCTTGTGGTGGGAGACAATGCTTTCACATACACAGTGTGCAATCTA 4440  
 D L E I N L V V G D N A F T Y T V C N L  
 4441 GGGGAGACTAAACCAATTGCATATAAGTCACATGTATATTCACACCTGAGTTAAATTT 4500  
 G E T K P I A Y K S H V Y S T P E L K F  
 4501 ACACCTGAGGAGAAAATTCTGGCTTCAGTTCAGATGATTATTCAGAAAGAGAGACCACTG 4560  
 T P E E K I L A S V Q M I I Q K E R P L  
 4561 GCAGCAAATAGAACCATACATAAACACACCTTTAGCTCAACTAGAAGCTGCCACAAAA 4620  
 A A N R T I H I N T P L A Q L E A A T K  
 4621 GCTAGCGTCCCAAATGCAAAAGCATTACACACTAGATGGATTCAATGGTCAGCATCTCAA 4680  
 A S V P N A K A L H T R W I Q W S A S Q  
 4681 CATGCTCCAGATGTAAAGTACCATTATAAGGCAGAATTGCAAAGACTGAGTGGATTGAGT 4740  
 H A P D V K Y H Y K A E L Q R L S G L S  
 4741 TGGACAATGGACACAGAGCCAGACATCTCACGGCCTGACATACCATTGTTTGTATTTTTC 4800  
 W T M D T E P D I S R P D I P L F D F F  
 4801 CAGGTGATTTACTCAGATGGGTCAGCTATCCCAGCAGTGGGGACACGGTCTAAGTACGCT 4860  
**RNase\_H\_like super family (c114782)**  
 Q V I Y S D G S A I P A V G T R S K Y A  
 4861 GCCGCATGCGCAGCAGTCGTAGGATACTTCACACATGAAGAAGAATTTATACATACTGAT 4920  
 A A C A A V V G Y F T H E E E F I H T D  
 4921 ATTGCAACCAAGCACCTGGGAGACATGTCTGCCAGACTGCTGAATTGCATGGGTTACTA 4980  
 I A T K H L G D M S A Q T A E L H G L L  
 4981 CTTGCATTGCGCCAAGCAGATTCAGGGAAGCCCACTCTAGTAGTCTCAGATTAGATTAC 5040  
 L A L R Q A D S G K P T L V V S D S D Y

5041 ATTGTCAGGGCTTATAACACTGACTTGCATTGGTGGATGCAAAATGACTTCAAAGACATT 5100  
 I V R A Y N T D L H W W M Q N D F K D I  
 5101 AGGCATAAAACTATTGCTTCCAGGCAGCTCTGGAAGCAGGTTTGGGATCTTAAACAGACT 5160  
 R H K T I A S R Q L W K Q V W D L K Q T  
 5161 TGCCCTTTACTATGGGTAATGCACACAAGAGCACATACCAAAGGGCACATTCATAGCACT 5220  
 C P L L W V M H T R A H T K G H I H S T  
 5221 GGCAATGCATTGGCAGATAAATATGCCAAAGAGCACACAGTGAGAAAAACAATAGCAGCC 5280  
 G N A L A D K Y A K E H T V R K T I A A  
 5281 ATAACCTGCTCAGCGACTGCAATGGATGAGGAAATAAAAGAGGCTTGTTTAGGTATTGTA 5340  
 I T R S A T A M D E E I K E A C L G I V  
 5341 CCTAGGCCAAAAGGTTTCCCCAGTAATTATATGTATGACATTGAAAATAATAGAGCAATA 5400  
 P R P K G F P S N Y M Y D I E N N R A I  
 5401 GTCACAATCCCTATGAAAAAGGGGATCCTATTCAAAGATTAATACCAAATAGAGCAGAC 5460  
 V T I P M K K G D P I Q R L I P N R A D  
 5461 AGGGAAAAGCTGATTGCAGCCACACACGCTGGACTTGCATCTACCCATTTTGGGGTGAGT 5520  
**Integrase\_H2C2 (pfam17921)**  
 R E K L I A A T H A G L A S T H F G V S  
 5521 GCAACTGCACAGCTGCTCCTTGATCGCTTCTGGTGGCCAGGGCTTCGACAGCAGGTGAAA 5580  
 A T A Q L L L D R F W W P G L R Q Q V K  
 5581 ATATATATTGCAAAGTGTGACACATGTTTACAGACAAGTGTGGACCACAGCAAAAAACCT 5640  
 I Y I A N C D T C L Q T T V D H S K K P  
 5641 AAGGAGGTTCTTTGAGAAAGGCAGCCTCGCCCTTTGAGATCCAATATATGGACCATATA 5700  
**rve (pfam00665)**  
 K E V P L R K A A S P F E I Q Y M D H I  
 5701 GGCCCACTACCAGCAGTAAACAAGTACAAGTACATTCTAGTAATAGTAGATTCTTGCAGT 5760  
 G P L P A V N K Y K Y I L V I V D S C T  
 5761 AGGTTTACCTGGATGATTCTCTCAAAGAAAAGCAGACTGCAAATCAGTCATACAGGCACCT 5820  
 R F T W M I P Q K K A D C K S V I Q A L  
 5821 AGGACTGTAGTAGCCATGACAGCAACTCAAACGTTCCATGCTGACAATGGTCCAGCTTTT 5880  
 R T V V A M T A T Q T F H A D N G P A F  
 5881 TCGGGGCGGGCCCTGAAGAAGGCATTAGAGGCATGGGGAACAGAGATGCATTTCTCACAC 5940  
 S G R A L K K A L E A W G T E M H F S H  
 5941 CCATTCTCGCCGAAATCGAACGGAATTGTGGAGAGGGCAAACCAAGTCTGTAAAAATGGGC 6000  
 P F S P K S N G I V E R A N Q S V K M G  
 6001 TTGACTAAAAGCATTCTGTCTTGGGGGGAACTGGSTAGACCATGTGCCTTTAGTGATC 6060  
 L T K S I L S L G G N W X D H V P L V I  
 6061 AGGAGTGTGAATAATTTACCACGCCAGTCTCTATGCAACGGTAAGACCCCATTTGAACTC 6120  
 R S V N N L P R Q S L C N G K T P F E L  
 6121 TTGTTTGGGAGAAAGATGTATATGCCTGACCTGCATGCTCTTCCAGCCCCATACCCAGG 6180  
 L F G R K M Y M P D L H A L P S P I P R  
 6181 AACGAGCAACTGCTGGCGACAACGCTGCTGAGGGAATCCCTCCAGGTGGAAGCTGCTGAG 6240  
 N E Q L L A T T L L R E S L Q V E A A E  
 6241 GCCAGTCTGAGAACACTCTCAAAGCAGGAGATTGGGTCTGGAAAAGATCCATGACAAG 6300  
 A S P E N T L K A G D W V L E K I H D K



6301 ACTCCATTTGGCCCGTCTTACAGACCAGCAGTGCAAGTAATCAGAGTGAAAGGTTCCAGA 6360  
T P F G P S Y R P A V Q V I R V K G S R

6361 ACTGCCATCCTACCCGCAATACCACCTAAGAGAGGTAAGGCAAGTTTCTGTGGACCAC 6420  
T A I L P A I P P K R G T R Q V S V D H

Po1 ORF end ←|

|→ Env ORF start

6421 CTAAAACCTGTGCCAGATGGTTTCCGCAATGTTTCCACGGAACCTCCCTCTTCCAAGTGA 6480  
L K P V P D G F R N V S T E P P S S K \*  
M V S A M F P R N L P L P S E

6481 GGAGCCCACGGAAGATGAAGAAATGGAGATCCGGCAAATGATGATGATAGGTGTGCAAGA 6540  
E P T E D E E M E I R Q M M M I G V Q D

6541 TGGGGAAGAATATGCCACTCTTGATTACACGTCCACAATTCAGGAAAGTACTGCAAGTCT 6600  
G E E Y A T L D Y T S T I Q E S T A S L

6601 GCCAATTTGGAACAGAAAGCCTTCCAAGTTGCTAAAGTGATGAAAGAATTCTTTGGAC 6660  
P I W K Q K A F Q V A K V M K E F F W T

6661 AGACTTCCTAAAACGGTGTATAAAATACTGGCAGTGTATTTCTCCTACTGTGGTTCAG 6720  
D F L K R C Y K I L A V Y F L L L W F S

6721 CCTCATTTTATTCTTCATCTCACTGACTTCTGGGCATTTTCTGAGCAAGGTTTCCACTCC 6780  
L I L F F I S L T S G H F L S K V S T P

6781 ACCTGTAAGCAAAGAAGTTGTTCTAAAGCCTTTAAGTTCTTACACATGTTAGAGAAAAG 6840  
P V S K E V V L K P L S S S H M L E K R

6841 AGAGCTCCCAGAGCCAGGAECTCCAGTCTCAATACAAATGTTTCTCTAACTATGGGTCA 6900  
E L P E P G T P V S I Q M F P L T M G H

6901 CGTGTGGATGCCATCATTCAAGACCTATAATGGCCAGCAACACAGCTACAAGTCCACAC 6960  
V W M P S F K T Y N G P A T Q L Q V H T

6961 CTTTTCTGTGATTGATGAATCCAGACTGTTTGCACCCAGTAATCCTGTGTCTAGAACATA 7020  
F S V I D E S R L F A P S N P V S R T Y

7021 CAGAGAAGTGTAAAGAACTAGGCTTCAGACATTTGCACAAAATGCATTATTTGATGTGTT 7080  
R E L L R T R L Q T F A Q N A L F D V F

7081 TGATGATGTGGAGGACCTCCATGAAATGGGGCCCCATGTGTGTTATGTGCGATATTACAA 7140  
D D V E D L H E M G P H V C Y V R Y Y N

7141 TGCCTTTTTACTTGTCAAACGTGAGCCAATCTGTGGCCTAAATACACATTCTGGGAACA 7200  
A F L L V K R E P I L W P K Y T F W E H

7201 CTGTGCAGTGCCTTTCCAAACTGATAGTCTGAATTCAAAGCACAGTTCCCATATATTTTC 7260  
C A V P F Q T D S P E F K A Q F P Y I S

7261 ACTGAGACCATATCAAGCAGGGGATTACATGTTTAAAATCAGTACAAATCCCTCCTGA 7320  
L R P Y Q A G D Y M F E N Q Y K F P P E

7321 GCCACATGATGCACAACATATGTATGTTGCAGATTCAGTCATCTTTGACAGAGAATACTT 7380  
P H D A Q H M Y V A D S V I F D R E Y F

7381 TGCAAACATGACTGAACAAACATGGCGGGGAACTGTCCCTCTATGGTCTACTTGGGGTCA 7440  
A N M T E Q T W R G T V P L W S T W G Q

7441 ACAGATATGGCAAATTAAGGGGTTACACGTTAGATATGGCTTGTAGGTTCCACATTT 7500  
Q I W Q I K G V H T L D M A C R F P H L

7501 AATGTATTTCTTAAATTATACGCAGTTCAGACCACTTGAGCAATAGGAACCTGAGTTT 7560

M Y F L N Y T Q F Q T T C S N R N L S F  
 7561 CTACCCTGAATGGGAGAAAACAGAAGGTGAGTTCTGGAGTGCCTATAGAGAAGCAAA 7620  
 Y P E W E K T E G E F W S A S Y R E A K  
 7621 AGAACGCAATGGCACCAAGCATATTACTTATGCATCAGGGGGACCTGTGTTATGGGCGGT 7680  
 E R N G T K H I T Y A S G G P V L W A V  
 7681 TCAAGCAAATGAATGCAATAAAAGAAAAGCAGGACTCAGTGTGGGCCCATATAGGGCTTG 7740  
 Q A N E C N K R K A G L S V G P Y R A W  
 7741 GAACTCCATAACACCTCCCTGACACAAGCTATATCAATAGGTAAGCTGTGCCAAGGAAT 7800  
 N S H N T S L T Q A I S I G K L C Q G M  
 7801 GCTTTCACAATATCACCTGAGTGAGGTGATACAATCTCTAGATAACTTCATAAAAGAAGA 7860  
 L S Q Y H L S E V I Q S L D N F I K E E  
 7861 GAATTGGACAGCTATCATGCAGTCAGCTGCTGGTCTGAGGCGCACCCAAAGTGGGCGTGT 7920  
 N W T A I M Q S A A G L R R T Q S G R V  
 7921 CAGGAGAGCAGCTACCTGCACCACCTCTGACCCTAGYGTACCTTGTGAGGTGGGACAAGC 7980  
 R R A A T C T T S D P S V P C E V G Q A  
 7981 ATCCATAACAGGAAAACTTACACTTGGTCACAAGCAATAATGCAAATCCTGCAAAGTGA 8040  
 S I T G K T Y T W S Q A I M Q I L Q T E  
 8041 AAGTGAGGCAGTACAGCGAGGATTTTCATGTTTCAGATGCTAATGATCAAGCGCTACAACA 8100

**Foamy\_virus\_ENV super family (c104051)**

S E A V Q R G F H V S D A N D Q A L Q Q  
 8101 AGGCTTCTATGCGCTAAGAGATGTCATAACAGATGTTGTGGGTTTGATTCAAATGACTT 8160  
 G F Y A L R D V I T D V V G L I Q N D L  
 8161 ATCTATCATTAGAAACGACCAAGAGGCCTCAGTAAGTCTTTCTGTAGTAAGTATTTTTT 8220  
 S I I R N D Q E A S V S L S V V T D F L  
 8221 GGACACTCTCAGCAGAGGAGTCCCAGATTGGAATGTGATTTTCATGGCCTGAACAAATACA 8280  
 D T L S R G V P D W N V I S W P E Q I Q  
 8281 GGCACCTAACTTGTCCAAGGTTGCAACACGCCAGGCAATGTCCGGCTCCACTTTCTTATT 8340  
 A L N L S K V A T R Q A M S G S T F L L  
 8341 GCTTAGTGTGTTAGCAAAGAGTGTAGTGGCAGCATCTGCTTGGGCGTCAGGCTCCACAAA 8400  
 L S V L A K S V V A A S A W A S G S T N  
 8401 TTGGATAGTGCACGGGGTACTAGACATTCCCATTCAAACAGCACCTCTATCATATGTCA 8460  
 W I V H G V L D I P I Q T A P S I I C Q  
 8461 AGAATTACACTCTTGGGGTAATGTACATTGGGTGAATGATACGTGGATCAGAGAAGATTA 8520  
 E L H S W G N V H W V N D T W I R E D Y  
 8521 TGTGGTACCATATTCACATGCATGTGTGTCATCAGCTAGGCCTGAACTGACACTGTACTC 8580  
 V V P Y S H A C V S S A R P E L T L Y S  
 8581 ATTACGTGATTGCAAAGGTTCTACTAGAATAATGTGTGAACATGCTGAGCCAGTGAATTC 8640  
 L R D C K G S T R I M C E H A E P V N S  
 8641 CTGTGACAGTAACTCGAAATGCACACTGCATATTGCACCAATTGACTCATTCTACTGTAA 8700  
 C D S N S K C T L H I A P I D S F Y C K  
 8701 AGCACATAGATTGCAAATGGTTCATATTTGGTGCATTTCAACCAATCTTGCTGTCATGT 8760  
 A H R L Q N G S Y L V H F N Q S C C H V  
 8761 CCCAATAGGAATACCAACTCTGATCACCGTAGGCACACAAGTTAAATGCTGTGGGTTTCAT 8820  
 P I G I P T L I T V G T Q V K C C G F I

8821 TTTGGATCCACCTAGCCCATTTCAATTGAAATCATTACACTGGCCTGGCTTCAATTTACA 8880  
L D P P S P F Q L K S L H W P G F N L Q

8881 AAAAATTGAGTACCCGAAATTGAGTTTATACATAGCAAAGCTGTAAAAATGCGGTTGGA 8940  
K L E Y P K L S L Y I A K L L K M R L E

Env ORF end ←|

8941 AGTGTGAAGTACTGAAGATACTATCTGCAAGCACACTCCGCTGTGGTCAAACAGATTGC 9000  
V \*

9001 ATCTCTGCTAGGCTCCGAACATACAAGGCAGGAAGCCTTGCACTCTCTGATTGACAGCTC 9060

9061 ACAGTTTAATGGGGCCAATACTGGCCTTTCTGCAATCACTAAAGTAGCTTCGAGTCTCCT 9120

9121 ACATAAAGGGCTGATTGCCTTGACACAGTCATTAGAACATTGACTTCGTCGAGTGCTTG 9180

9181 GTACAGTTGGCTGCTGATAATACCTGGACTTTTTCTCATATTTTGCTGTAGACACTGAAA 9240  
|→ Acc1 ORF start

9241 ATTATGACAAGCCACAGAATTACGGCCCTGGAAGCAACCCGTCTCCGGTACAGAACAGAG 9300  
M T S H R I T A L E A T R L R Y R T E

9301 CTGTGCAGACGTATGGGATATGAGCAGTGTTCCTGTTTCAAAGCATTATTTTSTCA 9360  
L C R R M G Y E Q C S L F Q K H F I X S

9361 TTRACCAGGAAGAARTCTACYGTGTCAGCCATCGCTAAGTGCYGAGTSTGTACCARGAR 9420  
L T R K K S T V S A I A K C X V C H Q E

9421 TCATTGCTTGMAAGAACGTGGGAGTYRCAGCSTCRCCTTCTAGACTGCCACTGTGGCKC 9480  
S L L A K N V G V X A S P S R L P L W X

9481 AATAGAATCTCCAGGACATTGGCTGTGCATAGAGACATTTGYGGMATTGAGAGTACTTC 9540  
N R I S R T L A V H R D I C G I Q R Y F

|→ Acc2 ORF

start

9541 CCACAAGTATTCTATTGTGAGTTCATTGAGAGTCCCTCTGACACCRGCGCTGATAATGGG 9600  
P Q V F Y C E F I E S P S D T X P D N G  
M G

9601 GKCATGCCAGAGCAAGAGAACTGCKCAGAGAACGAHRWAAGCGATTATTGCCMAATGCA 9660  
X M P E Q E K L X R E R X K R L L P N A  
X C Q S K R N C X E N X X S D Y C X M H

9661 TCCAGCACYYCCAMSGGCATTACCAAGGAAGCACCTGGTCCCTCTGCATCACAGCCGGAC 9720  
S S T X X G I T K E A P G P S A S Q P D  
P A X P X A L P R K H L V P L H H S R T

9721 CCAAGTAAGCCACAGAATGATCGATGCATGCTCTCAAACCCAGACCACAAGGCAGCTGGG 9780  
P S K P Q N D R C M L S N P D H K A A G  
Q V S H R M I D A C S Q I Q I T R Q L G

9781 GAAGCAAACGATGCAAATGASGGATTCTCTGGTTCCAAGAATACATGKCAGAAGGRAAA 9840  
E A N D A N X G F L W F Q E Y M X E G K  
K Q I M Q M X D S S G S K N T X Q K X K

Acc1 ORF end ←|

9841 AATGCCATAAASAGTGCRAGYGATGACATGAGCATTCTGTTCTCTTCTCCGCAATGCTT 9900

N A \*  
 M P K X V X S D D M S I L F S S P Q C F  
 9901 CTTAACSTACCTCAGAAAGAGACTYGCTTTTAATTCAGTGYTCAGAACACCTGACATTCT 9960  
 L T Y L R K R L A F N S V X R T P D I L  
 9961 ACACAGGTCATCYAAGCAAGCTGCTCAGTCAGACAGCACTGAACTGAAGAATTATCACAT 10020  
 H R S S K Q A A Q S D S T E L K N Y H I  
 10021 TCTACCTCAAGATGCAARTATGAATGCAAAGCAAACATATGAACTGGATGACCTCCACGT 10080  
 L P Q D A X M N A K Q T Y E L D D L H V  
 10081 GCTGATCGCTGTGAGTGACAAAGACACTCACATACTGGTTTATTTCCAAGGACACCGATT 10140  
 L I A V S D K D T H I L V Y F Q G H R F  
 10141 YAGACTATTAAGTGTATGTCATGTGASAATGTGCTCAAGATCACAAGCTCGACAGCTCA 10200  
 R L L T V Y A C X N V L K I T S S T A H  
 10201 TTGGKTCAAAAAACCAGGACSCAAGCTATGTTGGGTGCTAATTACTAATGGATTCTCAA 10260  
 W X K K P G X K L C W V L I T N G F S K  
 10261 RGATCCTGYAGCGTATTTTGAAGCCATYGCCAGTAATGATTTTGAATCAACCTAAATAC 10320  
 D P X A Y F E A I A S N D F A I N L N I

**Acc2 ORF end** ←|

10321 CTCCTTGTGAAYACAKGCATTATTAGCTAGGTCCAGTRACAATATAATGGACTCATGCTG 10380  
 S L \*

10381 AATACCTCAATGTTGGATATATGTAYTCATTTCATGCTAATGTTAGCAAGTAGTGCTAACC 10440

10441 CTTTCTAAATTTGATGCAGCTGTTGATGKTTATTTTTGTGTATAGCACACATTACAGGC 10500

10501 TCATAGGCGCTTTGCAWATATATCAAGCRGCTTAGTTAATTCTTGATGCAACAGCTKT 10560

10561 GTGCTRAAATATGATGTATACATGATRRTTTCCTTKTGCCACCAATATAGGCAATCTTTAT 10620

10621 GTAAYTATAGCTCCAGTAAGCGTATTCATGACTTCACAGAGCTACAGKTCTTTGATCTA 10680

**3' -LTR**

10681 TGKCAAAGTGCCTTGANGGGGGTATGTCATGATTTACAAAKGYTACRAACGAGYTAAGRC 10740

10741 AGSTRTGCCACAGACTTCCTAACCACAGATTAGCAGCCGTTGGTCTTCAACGACTTAATG 10800

10801 CCTTGAAATTACACGTGGTTTTGACACCATCATAGTAATAAGCTATGGATGTTCTTTGGG 10860

10861 CAAAAACACGCATTACACACAATGCAAGCGTGGCTTTCAAAGACAAAATCAGACACT 10920

10921 AACTGTAACTCACAGGCACTTGCCGTTAGGGTCAGCTAAAGGTGAACAGTTTCTCCTT 10980

10981 CAACCACAAGTAACAGCTTCTGTTTTAGATGGGCTCGTAGCAGAAAGCAGCCATGACAG 11040

11041 GAAGCAGGGTACCAGAATACATGTGTGGTTAAAGTGTCAAAGCAATAGTCACATTTAAA 11100

11101 CCCCTTCAGAAAATGCATTTCATATAATGGCATTGAAATAGGCCAGGAAAAAACACAGC 11160

|       |                                                                |       |
|-------|----------------------------------------------------------------|-------|
| 11161 | ACCTTGCCTGTTTCGTCAAGCGGAAGGCCATGCATTTCAATGGAAATAATCAAGAAGCAAG  | 11220 |
| 11221 | GACATCACCTTTCACTTGGGTTTTACATAGGTAAATAATGTGTGCAATGCAAACCTAAG    | 11280 |
| 11281 | CACAAGAGCAGGTTGAGACTGTAGACGTTCTGTCCARGGCGAGGAAGTGACGCACATAGT   | 11340 |
| 11341 | ACATGTAGGCTAAGTCACGGGTGTTAATATAAAAAAGCACAAACAGACTAAGGCTAAGAAAA | 11400 |
| 11401 | TTCCGCGCCAAGCAGACCACGATCGTGGGGGTTGGGAAGAGCAGTCGATAGCAGGTCGG    | 11460 |
| 11461 | AACAGCAAGCCCAGGAAACCGTGAGTTTCAAGTGTGTTGGTTGAACCTCTCTTGCAATG    | 11520 |
| 11521 | GTAGACTGACGGCGTGTTTTATTATGTCACTCCACTCCTGATCATACCATAGYATAGCTT   | 11580 |
| 11581 | AGACAAACATAACATGAACTCCATGATTGCTCAAGCTGGTGTTTCAGAATGATGAATTGT   | 11640 |
| 11641 | ACTTTATCTTTGTAAATGCAAATCATGCTTATAGCTTATGCAACAATGCTTTTTCTCTA    | 11700 |
| 11701 | TCTGACAGTATGCTATGTTTTACTGCGTTAATTATAGCTGGTGTAAATGATGATCAAATC   | 11760 |
| 11761 | TGGTAGAGAACAGAAGTGATATTAATATATTGACTTGCTACCTTTCAGTGTGAGCTTCA    | 11820 |
| 11821 | ATTTTTTGTAGTAATGCTTCAAATGAGGTCTCTCTGAGTCAAACGAACTACACAATATT    | 11880 |
| 11881 | TCTGGCTGAATTTTGTCAATTATGACAAGAGGTGCAAACACTCAGAGGAAGTCAAAGC     | 11940 |
| 11941 | GCTAGGCCGGAACCCATGAGGCGCCTCTCATCATAACTTAAAGACTTTGATTCTGTGCC    | 12000 |
| 12001 | ACACCACACAGCCCTACCTAGGGTCGAGGGGGCGGGCAGGGAATCACGCCCTAAGGGGC    | 12060 |
| 12061 | AATCAAGTCAG                                                    | 12071 |

>ERV-Spuma . b -Ame

5' -LTR

|      |                                                              |      |
|------|--------------------------------------------------------------|------|
| 1    | TGTCAAGTAATCTGAARCAATGTCTGAAGCAATTCAGCACTTTTAAAACAGCGTTCGCAA | 60   |
| 61   | TATTGCATTATGTGCAATTCTGAAGCAATATTATCAGTATTAAGTTTGTATGCTTTATC  | 120  |
| 121  | ATGCTTTGAAACATGTATGCGACAGTAATATGAGAAATATGAGAAAAGTGCTGTCAAGAA | 180  |
| 181  | AGCGTATATGTATGTTTCAGCTTCGCACAGCTTGGCTTTTGTATTAAGCAGTTCCAAATA | 240  |
| 241  | TGGAAATCCGATTCCGGACACAAAATGTCGGATTCATGATAACTAATATGGGCAGGTATT | 300  |
| 301  | CCGGCGTTTAGACTGGCTACTTTAAAATGGCGTCTTAAGCATCCGGATAGCCATATATGG | 360  |
| 361  | TTAGAACCATATATGGACAACCGACATTTCTATACTTGGCTATACAAAGGTTACTGGTG  | 420  |
| 421  | GGCACTGCCGTACAAAGGTAACCTAGTGCGTCTTGATATTAACACGAGGAATGAGAAGG  | 480  |
| 481  | GGTTATTCGAGAGCATTTCAGGTGAAGCTGGTTGGATAGCGGCCAGGACAAGAGGACTTG | 540  |
| 541  | GCAARAAWTGGATGGCTTCCAGCCAGGACACAAAGTGTGGCTTGAACCCAGCCAGGACA  | 600  |
| 601  | AATTGGCTGCCGCCCCAGCAAATGAGTCATCTAGCGATCTCTGCGGAGACTATAAATAAA | 660  |
| 661  | CCGCAAGCGCGGAGACATTRGGAGACGCAGGGCTGGAGGTGACAGGCAGCGAGCAGGTGC | 720  |
| 721  | TTCCCCGAGCGCAATGAACCGGGACAGAGTTCAAGCCAAAGCATAGCGCATAGCGCTTA  | 780  |
| 781  | GATGTGAGTAGTTATGTTGGAGATATTTTACCTTATGCAACGATGCTATGCACTGTGATT | 840  |
| 841  | GATGGAAAAGAAATAAGATAATACCAAACGAGGCTTGTGGATTATGTGCTAGCATATCA  | 900  |
| 901  | TTTAGAAAAGAAATAATGCAACAAGAGATATGCTGGTTCTATACGCAACTATAATCCTAA | 960  |
| 961  | TATTAACCATTTTTGCTTATTTCTGTAACATCGCTATTTTGATGATACTTAGCTTTATAT | 1020 |
| 1021 | ATAGGAAAATAAATACTTTATAAACTCAAACCTCTGAGTGRATCTATGCGTGAGAGATG  | 1080 |
| 1081 | TAATCATAATGTATTTTGAACCTAAGTGCTCACATTTAATAAATTCATGTCTAGCTAACT | 1140 |
| 1141 | TATGCGGGCTCTGGGATGAACAGCGGGCGCAGTTCCAAACAGAGATTTCCAATGAGCAGG | 1200 |
| 1201 | CTATCCTAAAACGTGATATAGTTCTCAGCTCTCCCAGGGGTAACCAGGGGAGGGTGGG   | 1260 |

1261 GCTCTATAAACACGACCCTAGGAGTGTGAAAACGTGACAAAGTGGCGCCCAACGTGGGGCC 1320  
 1321 TTAGGTCAAAGGTTAAAGGTCAAGTTAACCCCTTAGAGCTCAAGGGATAATTCATAAATAA 1380  
 1381 TATACCTCCCTTTTGGAGACTGAAGAGGCTGCAAAAGGGTTGTTAAGCTTAACAGTAAAA 1440  
 | → Gag ORF start  
 1441 GGAAACCTTCTAAGAACCATTAGAAGGGTTAACTGCTGCAGCTATGGCTGCCTATGTAG 1500  
 M A A Y V  
 1501 ATGTGGACATACCTGCTGTTTGCCGAGCAGCTGTGAATCGCTGGCTTGATGATGGAGGAG 1560  
 D V D I P A V C R A A V N R W L D D G G  
 1561 TAAGGGCAATTAATCAAAATTTTACGGTAGTAGTAGGACAACCAGGAGGATTGCCAGGGG 1620  
 V R A I N Q N F T V V V G Q P G G L P G  
 1621 AAACCTTTTTTACTTACATGAAAACACCCGGTGCTAGAGCAGCAGGAGTTTTTGATAAAT 1680  
 E T L F T Y M K T P G A R A A G V F D K  
 1681 TAAGAATACACAAAACTGAACACAATAGAGTATAGACCTTATGTATTTTCAGAGTTAG 1740  
 L R I H K N L N T I E Y R P Y V F S E L  
 1741 CTCTGCAACACATAGACCATCTGAATTGGTTTGAGGCGAGATTGCAGTATCCTGACACCT 1800  
 A L Q H I D H L N W F G G R L Q Y P D T  
 1801 TAGCCAGACATGGTCCGTTTCATACATGCAGGATTGTCAATCCAACAACCTGGCTAAATTC 1860  
 L A R H G P F I H A G L S I Q Q L A K F  
 1861 ACCCAAACAGAGAGGGACCATATGACAGGGAGCAGTACAGACTGTTGGCTACACATTTTG 1920  
 H P N R E G P Y D R E Q Y R L L A T H F  
 1921 AAAATGCAAGAAATCGTGCTTTAGAGTATGCCATGCAAAATACCAATGGGTGCACAACCAC 1980  
 E N A R N R A L E Y A M Q I P M G A Q P  
 1981 CAGGGGTTCCGCCACCAGATGGGGGAGGAATACAATTTTCAGACACTGAAACCTTGCTAG 2040  
 Gag\_spuma super family (c126624)  
 P G V P P P D G G G I Q F Q T L K P L L  
 2041 GACAGATGCCTAGGGAAGTGGGGGATTACCCAAATGGTATTTCAGAAAAATAGGGCAAC 2100  
 G Q M P R E V G D L P K W Y S E K I G Q  
 2101 TACAAGCTGCATTTCCACAAGTCACAGCTCTGCAGAGGCAGAGAGCTCTAGCGATGGTAC 2160  
 L Q A A F P Q V T A L Q R Q R A L A M V  
 2161 TCCCAGCAGGATGTACTCCGCCGTTAGAAAAGTTGTGAAAGCTGGATGTCAAGTGTACAGCT 2220  
 L P A G C T P P L E S C E S W M S V Y S  
 2221 GGCTATACATACAACTGATAGGCACTCCGTCTATAACAGCCCTGAATACTATACTGAAGG 2280  
 W L Y I Q L I G T P S I T A L N T I L K  
 2281 ATATAATAAACTCACAAGGAGCAGCAGCCATGAACCTAGGACTGGCAATATCAGGAG 2340  
 D I I N S Q G A A A A M N L G L A I S G  
 2341 GAAATTACCCGATGGTAGAAGGAATAATAATGCCTTTACTTAGAGGAGAGTCTGCCAGGT 2400  
 G N Y P M V E G I I M P L L R G E S A R  
 2401 TAGAGATTAACAATAGGCTCAACCCGCTCACCTTCAGCAGAAACAGGAACAATTTGGGG 2460  
 L E I N N R L N P L T L Q Q K Q E Q F G  
 2461 ACATAGTAACTGCTGTATACAGATCAATAGGCAGAGACCACCTGGGAAGGAAACCAGGGG 2520  
 D I V T A V Y R S I G R D H L G R K P G  
 2521 AAAATGTAAGAAAGGAATCCAAGATGCGCAGCCTGAAAAAGGCAATGCTCCCAGAGGTA 2580





3781 N G F F A Q P L A P E S Y K Y T A F T H 3840  
 CGTGAAAGCACTTTTCAGATGACACGGTTAATGCAAGGATACAAAAATAGTCCGGGAATA  
 3841 R G K H F Q M T R L M Q G Y K N S P G I 3900  
 TTCTCCAGTAGAATACAACTCTTTTAGCAGATATAGGAACTGCTGGCAATATGTTGAT  
 3901 F S S R I Q T L L A D I G N C W Q Y V D 3960  
 GACATATACTGTACAGATGATGATCTAGAAGAGCACCTTGAGAGAGTAGACCAGATAGTG  
 3961 D I Y C T D D D L E E H L E R V D Q I V 4020  
 CGTACTCTAGCTTCCAAGGGATACATATTTAATTTTAAGAAATCTTTAATAGCACATAGA  
 4021 R T L A S K G Y I F N F K K S L I A H R 4080  
 GAAGTTACATTTTTAGGGTTTACACTTACTGATCAAGGAAGAGGGCTTTCCACCAATTT  
 4081 E V T F L G F T L T D Q G R G L S P N F 4140  
 TTAGAGAAATGTGCAAATCTGCAGAGTCCTCGTAGTTTGAAGCAACTACAGGCTATGCTA  
 4141 L E K C A N L Q S P R S L K Q L Q A M L 4200  
 GGATTATTAATTTATGGGAGAACATATGTACCAACTATGCAGAATTGATCAAACCACTA  
 4201 G L L N Y G R T Y V P N Y A E L I K P L 4260  
 TATGCACTGTTGAAACCAATTTCCGTCCATCAGACTGGAAATCAGAACATGCAAATATT  
 4261 Y A L L K P N F R P S D W K S E H A N I 4320  
 TTGAATCATGTATATACATTAATGACTCAGACAGGTCCATTGCAGGACAGAAACCCAGAA  
 4321 L N H V Y T L M T Q T G P L Q D R N P E 4380  
 AAGGATTTGGAGGTTTCGCTAATGCCAGTAAAAATGCTTTTGCATACACTATGTGTAAC  
 4381 K D L E V S L M P G K N A F A Y T M C N 4440  
 AGAGGGGATAATAGGCCAATAGCCTACAGGTCACACATATACACTATAACCAGAGCAGAAA  
 4441 R G D N R P I A Y R S H I Y T I P E Q K 4500  
 TTTGCACTGGAGGAGCGGATTCTGGCAGCAGTTCAGATAATACTCCAGAAGGAACGTCT  
 4501 F A L E E R I L A A V Q I I L Q K E R S 4560  
 ATAGCAGCCGAAAGACCATACATATAATAACCAATCGCACAACTAGAAGCTACAAAT  
 4561 I A A G K T I H I I T P I A Q L E A T N 4620  
 CGTGCTAGTATACCTAATTCAAAGCACAAACATACCAGGTGGGTACAATGGATGTCCACT  
 4621 R A S I P N S K A Q H T R W V Q W M S T 4680  
 AGGGCAGCACCAGATGTACAGTTCATTACAAGGAAGAATTATTACCAATGTGTAATCTT  
 4681 R A A P D V Q F H Y K E E L L P M C N L 4740  
 GAATGGACACTACAAAATGAAGAAGATGTTAAAGAACCAGACATTCCATTATGGATGTAT  
 4741 E W T L Q N E E D V K E P D I P L W M Y 4800  
 GCTCATGTTTTATACACCGATGGATCGGCGATACCGGCTATAGGAACTAGGTCAAATAC

**RNase\_H\_like super family (c114782)**

4801 A H V L Y T D G S A I P A I G T R S K Y 4860  
 TCAGCAGCTTGTTTCAGTAGTGAAAGGAAGATTCAATCATCACAATGAATTTGAACCCTTA  
 4861 S A A C S V V K G R F N H H N E F E P L 4920  
 GACACACAACTAAACATCTAGGGGACACTTCAGCACAAGTAGCAGAATTGCAAGGTTTA  
 4921 D T Q T K H L G D T S A Q V A E L Q G L 4980  
 CTATTGGCACTCCGACAAGTTGTACCGAACCAACCAACATTAATAGTATCTGATTCAGAC  
 4981 L L A L R Q V V P N Q P T L I V S D S D 5040  
 TATGTGGTCAGAGCATTCAATACTGACCTACAATGGTGGGTAAAAAATGATTTTAAAGAT  
 Y V V R A F N T D L Q W W V K N D F K D

5041 TCAAAGGAAAGCCCATCTCAGCGAAGCAACTGTGGCAACAGGTGTGGAAAGTAAAAGAG 5100  
 S K G K P I S A K Q L W Q Q V W K V K E  
 5101 GGAAACTCTCTTTTATGGGTAACACATACTAAAGCACATAAAACTGACCATGTGCACAGT 5160  
 G N S L L W V T H T K A H K T D H V H S  
 5161 ACCGGCAATGCGCTGGCTGACTTATCCGCAAGGAAAAGGTCAACAAAATTAGTGGTAGCG 5220  
 T G N A L A D L S A R E R S T K L V V A  
 5221 GCACTAACCCGCTCAGCTACACGCATAGATGAGGATATACAGGCATGCCTAAAGGGTGGT 5280  
 A L T R S A T R I D E D I Q A C L K G G  
 5281 CCATACCCCTAAAGGCTATCCAAACACTTATGGTTATAGTGAAGAAGATAATGTAGTGCGA 5340  
 P Y P K G Y P N T Y G Y S E E D N V V R  
 5341 GTAACAATTCCAATGAAGAAAGGCGATCCCATCAAGAGGGTTCTACCGAACCAATCTGAA 5400  
 V T I P M K K G D P I K R V L P N Q S E  
 5401 AGAGAGAAAATGATAACAGCAGCACATGCAGGGCTGTCATCTACGCATTTTGGTATAAAT 5460  
**Integrase\_H2C2 (pfam17921)**  
 R E K M I T A A H A G L S S T H F G I N  
 5461 GCAACCACTCAGTTGCTACAAGCTAGATACTGGTGGCCGGAATTGAGAAAGCAAGTAAAA 5520  
 A T T Q L L Q A R Y W W P E L R K Q V K  
 5521 CACTACATTGCTAATTGTACCACTTGTCTACAGACAACGGTGGATCATACTAAGAAGCCT 5580  
 H Y I A N C T T C L Q T T V D H T K K P  
 5581 AAAGAAACCCATTACCAAGGGCACAGGTACCTTTTGGTGCATGTTTATGGACCACATT 5640  
**rve (pfam00665)**  
 K E T P L P R A Q V P F E C M F M D H I  
 5641 GGTCCATTACCACAGTGAATAAATCAAATATCTACTCATCATAGTTGATTGATTGATTGACC 5700  
 G P L P P V N K F K Y L L I I V D S C T  
 5701 AGGTACACCTGGATATACCCTCAACGGAATGCTGATTGCAGGACAGTCATAAAGGACTTG 5760  
 R Y T W I Y P Q R N A D C R T V I K D L  
 5761 CGATCCTTATTTGCTATGACATCAGTACAAACCTCTATGCTGACAATGGCCCAGCCTTT 5820  
 R S L F A M T S V Q T L Y A D N G P A F  
 5821 ACTGGCAAAGCCGTTTCCAGGAGGCTGTGACAAGTATGGGGGCAAAACTGTCTTTCTCAACC 5880  
 T G K A V Q E A V T S M G A K L S F S T  
 5881 CCTTTTCAACCGGAAGGGAATGGAGTTGTGGAAAGGGCTAACGGGATTATTAACAAGCC 5940  
 P F H P E G N G V V E R A N G I I K Q A  
 5941 CTGACTAAATGCATTTTGGCTGGAGGAGTAACTGGCTAGAACATGTACCCTTGGTAATG 6000  
 L T K C I L A G G G N W L E H V P L V M  
 6001 AGAAGCATAAAACAACCTGCCTCGTCAATCACAGTGCAATGGTAAATCTCCTCATGAACTC 6060  
 R S I N N L P R Q S Q C N G K S P H E L  
 6061 TTGTTTGGCGTCCCAATGTATATGCCTGACTTACATAATCCCTCCAGTCCCTCAACCAGG 6120  
 L F G V P M Y M P D L H N P S S P S T R  
 6121 CCAGATCAGCTGCTGCTAACAACGCTGTTGAGAGATTCTCTCCAGGAGACGACTTCAGAG 6180  
 P D Q L L L T T L L R D S L Q E T T S E  
 6181 CCACCTGAAGAACCGACCCTGAAGAAAGGAGACTGGGTGTTGGAGAAAATCCATGACAGA 6240  
 P P E E P T L K K G D W V L E K I H D R  
 6241 ACGCCATTGGGTCCATACTACCGTCCGGCAGTTCAAGTGATCAGTGTCAAAGGAACAAGA 6300  
 T P L G P Y Y R P A V Q V I S V K G T R

6301 ACAGTGGTAATTCCAGCTCTTCCGCCGAAGAAAGGTACACGCCAAGTGTCCATCGATCAT 6360  
**T V V I P A L P P K K G T R Q V S I D H**  
 Po1 ORF end ←|

|→ Env ORF start

6361 CTTAAACCAGCACCTG**ATGG**TACTGCAATGTTTCCAAGGGA**ACTACAGACTCTGAATGA** 6420  
**L K P A P D G Y C N V S K G T T D S E \***  
**M V T A M F P R E L Q T L N E**

6421 AGGTCATGAGGAATTTGCATTGGTACCTCGAGTAAGA**ACTAGTGACGTGCCAAGTGT**CAC 6480  
**G H E E F A L V P R V R T S D V P S V T**

6481 ACGAGGACTAAATATTCGACCAAGTTAGTGACCTTTTTGCAAGAAAAAAGCAGTAAATT 6540  
**R G L N I R P R L V T F L Q E K S S K F**

6541 TGTCCAGCAAATTCAGAGACTGTATTGGACTAGAAGATGGAAGATGATCTACATACTACT 6600  
**V Q Q I Q R L Y W T R R W K M I Y I L L**

6601 GGCAGCATTCTACTTTTTGCTGTGGCTAAGTCTCATAGTCTTTTATGCCACACTTACCAC 6660  
**A A F Y F L L W L S L I V F Y A T L T T**

6661 TGGACACTTTTTAAACATCTGTCAATCCACACCCAGAAAGCAGCCTGGTTAATTTAACACC 6720  
**G H F L T S V N P H P E S S L V N L T P**

6721 ATTAGCGTCTCACATGTATTGCATAAAAGGGGAATAAAGGATAAGGATAAAACCGTAAC 6780  
**L A S S H V L H K R G I K D K D K T V T**

6781 AATAAGCATATATCCACTCCCTTAGGCCAGTTCTGGATCCCTCARTACAGAACATTTGA 6840  
**I S I Y P L P L G Q F W I P Q Y R T F D**

6841 TGGGCCGTCATTGCAAATACAAGTACATACTCTATCTGTAATAGATGAGTCACGCCTTTT 6900  
**G P S L Q I Q V H T L S V I D E S R L F**

6901 TACACCTAACATTCCAGTTTCTCAAATGTACAGGGATATGCTTAGGGCTAAGCTTGTAA**C** 6960  
**T P N I P V S Q M Y R D M L R A K L V T**

6961 ATTCACACAAGGGGCACTGYTAGATCCCGAGGATGATATTGAGGATTTACATAGCCTAGC 7020  
**F T Q G A L L D P E D D I E D L H S L A**

7021 AGAACAYATTTGCTATGTGAGGTA**CTATGACACCTTTCTATTTTATAAACATGAACCTAT** 7080  
**E H I C Y V R Y Y D T F L F Y K H E P I**

7081 AAGATGGATAAAAYCACACACACTGGGAACATTGTGCAGTACCCTTTGTAACCTCAAGTAA 7140  
**R W I N H T H W E H C A V P F V T S S N**

7141 TGAGTTTAAAGCTCAATTCCCATATATAACTCCAGGAGTCTATAAACTGGGAGATTATAG 7200  
**E F K A Q F P Y I T P G V Y K L G D Y R**

7201 ATATGAGAATCAATATGAGTTTCTCCAGAGCCAAAGGGCAAAACATTCTATTGGTCAAC 7260  
**Y E N Q Y E F P P E P K G K T F Y W S T**

7261 CCAGTCAGTAGTGTATGACAGGGGGTTCTATAGGAACATGACAGAAGAATCCTGGAAAGA 7320  
**Q S V V Y D R G F Y R N M T E E S W K E**

7321 AGCKGTACCGTTAAACTCCACATGGGGGGTGAACACTGGCAGATTMGGGGAGATGAATC 7380  
**A V P L N S T W G G E H W Q I R G D E S**

7381 CCTAGATCTAGCATGTAGGTTTCCCATCTCATGTACTTTTTAAATTACACTCACTATCA 7440  
**L D L A C R F P H L M Y F L N Y T H Y Q**

7441 AACAACTGCAGTAAGCATAATACCTCTTCTACCCTGATTGGGAGATGGTAGATGGGGA 7500  
**T T C S K H N T S F Y P D W E M V D G D**

7501 TTTCTGGAATGCTAGCTATAGGGAYAAKATGAARCTGAATGGTTCTAAACCAATCACATA 7560

F W N A S Y R D X M K L N G S K P I T Y  
 7561 TGCTTCAGGGATCCCAGTACTCTGGGCAGTACAGGCTAATGAGTGTAACAGGAGACGGTT 7620  
 A S G I P V L W A V Q A N E C N R R R F  
 7621 TGGTGCTAGCGTAGGTCCATACAGGGCTTGGGCAACGCACAATAACTCACAGACATATGC 7680  
 G A S V G P Y R A W A T H N N S Q T Y A  
 7681 AATTTCCATAGGAAAATTGTGCCAGGCTATGTCTCACACTACACATCTGAGTGAGGTATT 7740  
 I S I G K L C Q A M S H T T H L S E V L  
 7741 ATCAACGATAGAAGCCTGGGGAAAATCAGAAAATTGGACAGAAAATCATGAACTAGTCTC 7800  
 S T I E A W G K S E N W T E I M K L V S  
 7801 CCAATGGGAGGATAATAGTTCTAAGCGAACAAAAAGAGAAGTCAGCTGTAARAGTGATGC 7860  
 Q W E D N S S K R T K R E V S C K S D A  
 7861 TGAGACGTGTAGCAGAGATAGTAACACATACACTTGAAGGAAGTCATCCTAGCTATCCA 7920  
 E T C S R D S N T Y T W K E V I L A I Q  
 7921 GAAAACAGAGCAAGAAGCGGTAAGGAAGGCTTTAAAGCAGCGGATGAAAACCTTCTACCA 7980

**Foamy\_virus\_ENV super family (c104051)**

K T E Q E A V K E G F K A A D E N F Y Q  
 7981 GCTACAACAGGGATTGTACATTCTGAGAGATGTAGTTACTTCTGTGATAGGAACTCTGCA 8040  
 L Q Q G L Y I L R D V V T S V I G T L Q  
 8041 GCATGATCTATCTGCAATCAGAAATGATCAACAGGCAGCTTCCAGCTTGACTTTAGTATC 8100  
 H D L S A I R N D Q Q A A S S L T L V S  
 8101 AAACCTTTCTGGATACACTGACCAGAGGTGTGCCAGACTGGACTCTAATCACATGGCCAAA 8160  
 N F L D T L T R G V P D W T L I T W P N  
 8161 CCAAATGAATGAGCTGAATTTAACTAAGAGAGCAAAGCGGCAAGCTATGAAAAGGACTTC 8220  
 Q M N E L N L T K R A K R Q A M K R T S  
 8221 CTACACGCTGTAAAGCACTCTCAGCAAAAAGTTTTATTCTTCATCAGCATGGTCAGACGA 8280  
 Y T L L S T L S K K F Y S S S A W S D D  
 8281 TGTACAATCATGGACGATTTCATGGCATTTTGGACATTCCAGTAGCAAGCGTTTCCACTAT 8340  
 V Q S W T I H G I L D I P V A S V S T M  
 8341 GTACTGTCATGCCTTAATGAACTGGGGTACTATGCATCGAGTGGAAGGACAATGGATACG 8400  
 Y C H A L M N W G T M H R V E G Q W I R  
 8401 CTCCAGCTACGTGGTGCCTTACACTCAGCTTGTGTCACACATGAAGATCCRACAGTGAG 8460  
 S S Y V V P Y T H A C V T H E D P T V R  
 8461 ACTTTATGCTTTAGTGAAGTGTGTWGGGGCAGCACGATTACAATGTCARGAAGTTACRAG 8520  
 L Y A L V N C V G A A R L Q C Q E V T R  
 8521 GAAAAATCCWTGTAGTCAGWCAGTCCAAGATGAATGCGTGCTGCATGCAGATAAAATGGG 8580  
 K N P C S Q X V Q D E C V L H A D K M G  
 8581 AACATTTTCGAGCAAAGCGCATCTACTGCCAAATGGATCMTATGTCGTCCARTTCAACAC 8640  
 T F S S K A H L L P N G S Y V V Q F N T  
 8641 GTCATGTTGTAATATTCCAAAAGGAGTAACAACGCTGATAACCGTCACGTCAACAGTCAA 8700  
 S C C N I P K G V T T L I T V T S T V K  
 8701 ATGCTGTGGATATATGTTGACGCCGCCAGTACAGGTCAGGCCGACCCAACCTAAATGGCC 8760  
 C C G Y M L T P P V Q V R P T Q L K W P  
 8761 AAAACTCGTACTTCAACAGATGGATTTTCTGTGCTGACGCTCAGGTTGGCTGAACTCAG 8820  
 K L V L Q Q M D F P V L T L R L A E L S

8821 TAAATGAAAATAATCATTAAAAGCACTGCTCAGACATTGAAGAAGCAGCATCAAATGC 8880  
 K M K I I I K S T A Q T F E E A A S N A  
 8881 CATACTAACAGAGAACCTTTTGGCTGCTACGTCATCTTGGGGCGAGGCCCTGAGTGC 8940  
 I H L T E N L L A A T S S W G E A L S A  
 8941 ATTGCTTAAAAGCTCATCGTTTCAAGGATCACTTCAATTTTAAGCAACATCACAGACTG 9000  
 L L K S S S F Q G F T S I L S N I T D W  
 9001 GGCATCAAGTGAATCAGTACAGCAGGAAAAGGTGCTCCTCGGTCTGATCTCGACTCTGGC 9060  
 A S S A I S T A G K G V L G L I S T L A  
 9061 TTCCGGCCTTTCACCTTTGTTCTACATTGCTCTGATAGGAGGTTGTTTTTAATTCTCTT 9120  
 S G L S P L F Y I A L I G G L F L I L F

Env ORF end ←|

|→ Acc1 ORF start

9121 TCTGTTGCTAAGACACTGACAAAAGCGATGCTGCTTTTCTGGAAATGCTTTGACAAGT 9180  
 L L L R H \*

M A A F P G N A L T S

9181 GAACAAATGCGCATGCGCAARAWAACTTGTGAAATACTTGGCTATGAAACTATCAGAGAG 9240  
 E Q M R M R K X T C E I L G Y E T I R E  
 9241 TATAATGACACTTTCATGTTCTCTCTAGAACGCATCCGGGAGAGACATAAGGTGGTTGCA 9300  
 Y N D T F M F S L E R I R E R H K V V A  
 9301 GACTGTCGCTTCTGCTACGAAAGAATTCTGCTAATACCAGAAGTGCAGACAACACTGACA 9360  
 D C R F C Y E R I L L I P E V R R Q L T  
 9361 TTTGACTCCAAGCTTAGACGCAGACATAGAACTTGGCTCTCTCAACATCGTGATCAGTGT 9420  
 F D S K L R R R H R T W L S Q H R D Q C  
 9421 GCCACACAAGTTCTATATCCTGAAATCTTCTGTTTCAGCCTCAATTGCTGAAGGCAACCCG 9480  
 A T Q V L Y P E I F C S A S I A E G N P

|→ Acc2 ORF start

9481 CTATTGCCTGCACAGGAAGCTCAAGATGGTCTCAGAGTTGCAGCAAGCAGGAGAAGCGTCA 9540  
 L L P A Q E A Q D G S E L Q Q A G E A S

M G Q S C S K Q E K R Q

9541 ACAGAGCAGGCGTCTCTGAGCTACCGAGACCCAACCGGCGGTGCTCACCGAGTTTCAA 9600  
 T E Q A S S E L T E T Q P A V L T E F Q  
 Q S R R P L S S P R P N R R C S P S E N  
 9601 CCAGCGCTGCTCGCCGAGTCTCAACAGACGGTGCTCACCGAACTTCAACCAGCGGCCA 9660  
 P A L L A E S Q Q T V L T E L Q P A A P  
 Q R C S P S L N R R C S P N E N Q R R Q  
 9661 GGAGGATACCTATGTAACCATGGAACCTCTGCTTCATCCATTGAGACCCATGGGCCAGAC 9720  
 G G Y L C N H G T S A S S I E T H G P D  
 E D T Y V T M E P L L H P L R P M G Q T  
 9721 TCCATGTTCAACATTGATGGTGCGCCATGGAATGACATCACATCAGAAGAGATCGCAACT 9780  
 S M F N I D G A P W N D I T S E E I A T  
 P C S T L M V R H G M T S H Q K R S Q L

Acc1 ORF end ←|

9781 TGGCTTCTCGAGATTGCCTCTTCGTCCAAAAGTCCATGGGCCAGGAATGGTTACTA 9840  
 W L L E I A S S S \*

9841 G F S R L P L R P K N C P W A R N G Y Y 9900  
 TGCTCCAGGAGTCAACAGAGGCCTATGGAGTCCACCAATTGTGAGAAATCCGCAAACATT  
 9901 A P G V N R G L W S P P I V R N P Q T L 9960  
 GGTTCATCATACTACATTGCAGATTGTTTAAGAACTTTCCGTACGCCACTCCAGAACCGAT  
 9961 V I I L H C R L E K N F P Y A T P E P I 10020  
 TGCGGTGGGTAACGAGAGAAAATATTGCTTTCCGACTCTGCAGCCACGTCCAGGACCGTC  
 10021 A V G N E R K Y C F P T L Q P R P G P S 10080  
 ATTTACTTCATATGATTATGGAAGCTGGCTGAACTTAGAGCACATGCATATTGAAGTCAC  
 10081 F I S Y D Y G S W L N L E H M H I E V I 10140  
 TGTAGGTGATTTAGGTACTCGTATACTGCATATGATATATCCGCTTCTGCAAGATCTCA  
 10141 V G D L G T R I L T Y D I S A S A R S H 10200  
 TCTTTGGGTGGTGTACTTCTGTACYAAAAGATTGATTATAGAATCAGGCCCGATGGTATG  
 10201 L W V V Y F C T K R L I I E S G P M V W 10260  
 GGAAGGTGACTCAAGAATCCCTTTGTATTGGAATATAATTATGTCTGGTCAGAGTGGTTT  
 10261 E G D S R I P L Y W N I I M S G Q S G F 10320  
 YAACGATGCACCAGATTTCCGTGCRCTTTACAAATTATGCCTTTGGCTAATGCTAACTCA  
 N D A P D F R A L Y K L C L W L M L T Q  
**Acc2 ORF end ←|**  
 10321 GATTCTTGAAGCATTTTAAATTAATACTGTATGTTTTTTGACTGTGTGTTAGCCTCGCCT 10380  
 I L E A F \* 3' -LTR  
 10381 TGTGTCTCATCTGAACATTGGGGGGTGTCAAGTAATAGCAAGTCTGAAGCATTTCAGCA 10440  
 CTTTAAAACAGTGTTAGCAATATTAAGCACATGTCTTAATGCAATATTGCAGTTTACGA 10500  
 10501 TATATTATCAGTATTAAGTTTGTTATGCTTTATCATGCCTTGAAAACATGTATGCGACAG 10560  
 10561 AAATATGAGAAATATGAGAAAAGTGCTGTCATTAGAAAAGCGTTATGTATGTTTCAGCTTCG 10620  
 10621 CACAGCTTGGCTTTTGGCTATTAAGCGGTTCCAAATATGGAATTCCGATTCCGGACACAAA 10680  
 10681 ATGTCGGATTAATGTACTAATATGGGCAGAGGTTCCGGCGTTTACTGACTGGCTACCTTAAA 10740  
 10741 ATGGCGTCTTAAGCATCCGGATAGACATATATGGTAGAACCATATATGGACAACCGACAT 10800  
 10801 TTCCTATACTTGGCTGTACAAAGGTTACTGTGGATGGGCATGCCGTACAAAGGTAACCTCT 10860  
 10861 AGTGC GTTGGTATTAACACGAGGAATGAGAAGGTTATTCGAGAGCATTTCGTGAGCTGG 10920  
 10921 TTGGATAGCGGCCAGACAAGAGGTTTGGCAGAAATGGATGGCTTCCGCCAGGACACAATG 10980  
 10981 TTGGCTTGAACCCAGCCAGGCACAAATTGGCTGCCGCCAGCAAATGAGTCATCTAGCG 11040  
 11041 ATCTCTGCGGAGACTATAAATAAACC GCAAGCGCGGAGACATTGAGAGACGCAGAGCTGG 11100

11101 **AGGTGACAGGCAGCGAGCAGGTGCTTCCCCGCAGCGCAATGAACCGGGACAGAGTTCAAG** 11160  
 11161 **CCAAAGCATAGCGCATAGCGCTTAGATGTGAGTAGTTATGTTGGAGATATTTTACCTTAT** 11220  
 11221 **GCAATGATGCTATGCACTGTGATTGATGAAAAGGAAATGAATAATACAAACGAGGCTTGT** 11280  
 11281 **TGGATTATGTGCTAGCATATCATTAGAAAGAGAAATAATGCAACAAAAGATATGCTGGTT** 11340  
 11341 **CTATACCAACTATAATCCTAATATTAACCACTTTTGCTTATTTCTGTAACATCGCTATTT** 11400  
 11401 **TGATGATACTTAGCTTTATATATAGGAAAATAAATACTTTATAAACTCAAACCTCCTGAG** 11460  
 11461 **TGAATCTATGCGTGAGAGATGTAATCATAATGTATTTTGAACCTAAGTGCTCACATTTAA** 11520  
 11521 **TAAATTCATGTCTAGCTAACTTATGCGGGCTCTGGGATGAACAGCGGGCGCAGTTCCAAA** 11580  
 11581 **CAGAGATTTCCAATGAGCAGGCTATCCTAAAACCTGTGATATAGTTCTCAGCTCTCCCCAG** 11640  
 11641 **GGGTAACCAGGGGAGGGTGGGGCTCTATAAACACGACCCTAGGAGTGTGAAAACGTGA** 11698

**Fig. S1 Detailed descriptions of the putative genomes of consensus ERV-Spuma-Rbi, ERV-Spuma-Smu, ERV-Spuma.a-Ame and ERV-Spuma.b-Ame.** The location of the proteins encoded by the gag, pol, env and accessory genes were determined via homology to representative foamy viruses, searching CDD, and the distribution of start and stop codons, determined by ORFfinder (<https://www.ncbi.nlm.nih.gov/orffinder/>). The conserved domains were determined by searching against the CDD and highlighted in darker colors.

**Table S1 The endogenous foamy viruses or expressed foamy viruses identified in amphibians**

| <b>Name</b>      | <b>Accession</b> | <b>Start</b> | <b>End</b> |
|------------------|------------------|--------------|------------|
| ERV-Spuma.1-Rbi  | NC_042615.1      | 57913154     | 57923911   |
| ERV-Spuma.2-Rbi  | NC_042615.1      | 114546185    | 114557134  |
| ERV-Spuma.3-Rbi  | NC_042615.1      | 176373255    | 176384027  |
| ERV-Spuma.4-Rbi  | NC_042615.1      | 186770869    | 186781941  |
| ERV-Spuma.5-Rbi  | NC_042615.1      | 403426764    | 403430415  |
| ERV-Spuma.6-Rbi  | NC_042615.1      | 446625627    | 446636700  |
| ERV-Spuma.7-Rbi  | NC_042615.1      | 515087848    | 515094280  |
| ERV-Spuma.8-Rbi  | NC_042615.1      | 515097901    | 515101715  |
| ERV-Spuma.9-Rbi  | NC_042615.1      | 548052230    | 548063158  |
| ERV-Spuma.10-Rbi | NC_042615.1      | 589501560    | 589512639  |
| ERV-Spuma.11-Rbi | NC_042615.1      | 635649370    | 635660442  |
| ERV-Spuma.12-Rbi | NC_042615.1      | 671043665    | 671054909  |
| ERV-Spuma.13-Rbi | NC_042615.1      | 675516579    | 675527635  |
| ERV-Spuma.14-Rbi | NC_042615.1      | 777987655    | 777998718  |
| ERV-Spuma.15-Rbi | NC_042615.1      | 825609939    | 825620627  |
| ERV-Spuma.16-Rbi | NC_042615.1      | 826747553    | 826752189  |
| ERV-Spuma.17-Rbi | NC_042615.1      | 826826061    | 826830692  |
| ERV-Spuma.18-Rbi | NC_042615.1      | 827968128    | 827976005  |
| ERV-Spuma.19-Rbi | NC_042615.1      | 836123690    | 836128117  |
| ERV-Spuma.20-Rbi | NC_042615.1      | 836447044    | 836451469  |
| ERV-Spuma.21-Rbi | NC_042616.1      | 43444302     | 43455378   |
| ERV-Spuma.22-Rbi | NC_042616.1      | 52543808     | 52554540   |
| ERV-Spuma.23-Rbi | NC_042616.1      | 66710433     | 66721175   |
| ERV-Spuma.24-Rbi | NC_042616.1      | 253245806    | 253256618  |
| ERV-Spuma.25-Rbi | NC_042616.1      | 269613232    | 269624173  |
| ERV-Spuma.26-Rbi | NC_042616.1      | 376726602    | 376737688  |
| ERV-Spuma.27-Rbi | NC_042616.1      | 682563473    | 682574561  |
| ERV-Spuma.28-Rbi | NC_042616.1      | 691545221    | 691553333  |
| ERV-Spuma.29-Rbi | NC_042616.1      | 746413620    | 746424607  |
| ERV-Spuma.30-Rbi | NC_042616.1      | 750302072    | 750313335  |
| ERV-Spuma.31-Rbi | NC_042617.1      | 2007834      | 2018809    |
| ERV-Spuma.32-Rbi | NC_042617.1      | 29442792     | 29453871   |
| ERV-Spuma.33-Rbi | NC_042617.1      | 159236272    | 159239483  |
| ERV-Spuma.34-Rbi | NC_042617.1      | 160600721    | 160611797  |
| ERV-Spuma.35-Rbi | NC_042617.1      | 169204364    | 169215436  |
| ERV-Spuma.36-Rbi | NC_042617.1      | 214902017    | 214913071  |
| ERV-Spuma.37-Rbi | NC_042617.1      | 219308229    | 219319305  |
| ERV-Spuma.41-Rbi | NC_042617.1      | 489103847    | 489115246  |
| ERV-Spuma.42-Rbi | NC_042617.1      | 552774854    | 552785928  |
| ERV-Spuma.43-Rbi | NC_042618.1      | 47926199     | 47937269   |
| ERV-Spuma.44-Rbi | NC_042618.1      | 237803481    | 237806878  |



|                  |                |           |           |
|------------------|----------------|-----------|-----------|
| ERV-Spuma.45-Rbi | NC_042619.1    | 116756494 | 116767721 |
| ERV-Spuma.46-Rbi | NC_042619.1    | 186128395 | 186139463 |
| ERV-Spuma.47-Rbi | NC_042619.1    | 197444532 | 197455605 |
| ERV-Spuma.48-Rbi | NC_042619.1    | 266144830 | 266147964 |
| ERV-Spuma.49-Rbi | NC_042619.1    | 360008464 | 360013251 |
| ERV-Spuma.50-Rbi | NC_042619.1    | 360018300 | 360024753 |
| ERV-Spuma.51-Rbi | NC_042620.1    | 266267256 | 266276476 |
| ERV-Spuma.52-Rbi | NC_042620.1    | 267358459 | 267369541 |
| ERV-Spuma.53-Rbi | NC_042620.1    | 368612820 | 368619308 |
| ERV-Spuma.54-Rbi | NC_042620.1    | 371475210 | 371484296 |
| ERV-Spuma.55-Rbi | NC_042621.1    | 107758018 | 107769092 |
| ERV-Spuma.56-Rbi | NC_042623.1    | 130432355 | 130443436 |
| ERV-Spuma.57-Rbi | NC_042623.1    | 199024438 | 199035509 |
| ERV-Spuma.58-Rbi | NC_042628.1    | 62603328  | 62614595  |
| ERV-Spuma.59-Rbi | NC_042628.1    | 75436985  | 75443604  |
| ERV-Spuma.60-Rbi | NC_042630.1    | 45827674  | 45838744  |
| ERV-Spuma.61-Rbi | NC_042630.1    | 65454091  | 65459864  |
| ERV-Spuma.62-Rbi | NC_042630.1    | 65572022  | 65577794  |
| ERV-Spuma.63-Rbi | NC_042631.1    | 54174916  | 54185932  |
| ERV-Spuma.64-Rbi | NC_042631.1    | 54524554  | 54535631  |
| ERV-Spuma.65-Rbi | NC_042631.1    | 56301530  | 56312580  |
| ERV-Spuma.66-Rbi | NC_042633.1    | 11426635  | 11433226  |
| ERV-Spuma.67-Rbi | NW_021820742.1 | 26371     | 37447     |
| ERV-Spuma.1-Smu  | VKOC01000001.1 | 49875522  | 49884790  |
| ERV-Spuma.2-Smu  | VKOC01000003.1 | 20706007  | 20713074  |
| ERV-Spuma.3-Smu  | VKOC01000006.1 | 40686824  | 40692669  |
| ERV-Spuma.4-Smu  | VKOC01000006.1 | 42271905  | 42281821  |
| ERV-Spuma.5-Smu  | VKOC01000008.1 | 22953512  | 22963804  |
| ERV-Spuma.6-Smu  | VKOC01008314.1 | 72        | 4465      |
| ERV-Spuma.7-Smu  | VKOC01015915.1 | 24811     | 29338     |
| ERV-Spuma.8-Smu  | VKOC01016144.1 | 1         | 7755      |
| ERV-Spuma.9-Smu  | VKOC01019137.1 | 1         | 5488      |
| ERV-Spuma.10-Smu | VKOC01022720.1 | 9967      | 17303     |
| ERV-Spuma.11-Smu | VKOC01027761.1 | 1232      | 5594      |
| ERV-Spuma.12-Smu | VKOC01030981.1 | 5362      | 12987     |
| ERV-Spuma.13-Smu | VKOC01047117.1 | 2187      | 9405      |
| ERV-Spuma.14-Smu | VKOC01047174.1 | 12676     | 17559     |
| ERV-Spuma.15-Smu | VKOC01047612.1 | 1         | 8318      |
| ERV-Spuma.16-Smu | VKOC01047638.1 | 51517     | 57974     |
| ERV-Spuma.17-Smu | VKOC01047639.1 | 1         | 9956      |
| ERV-Spuma.18-Smu | VKOC01047906.1 | 1         | 8658      |
| ERV-Spuma.a1-Ame | PGSH01000001.1 | 6264623   | 6267657   |
| ERV-Spuma.a2-Ame | PGSH01000019.1 | 572302    | 576144    |
| ERV-Spuma.a3-Ame | PGSH01001354.1 | 555509    | 563270    |

|                   |                |          |          |
|-------------------|----------------|----------|----------|
| ERV-Spuma.a4-Ame  | PGSH01003802.1 | 2637539  | 2640797  |
| ERV-Spuma.a5-Ame  | PGSH01003802.1 | 2643293  | 2652371  |
| ERV-Spuma.a6-Ame  | PGSH01003802.1 | 2795137  | 2799409  |
| ERV-Spuma.a7-Ame  | PGSH01003848.1 | 851768   | 862610   |
| ERV-Spuma.a8-Ame  | PGSH01005059.1 | 1810596  | 1820414  |
| ERV-Spuma.a9-Ame  | PGSH01006364.1 | 1286001  | 1298399  |
| ERV-Spuma.a10-Ame | PGSH01006377.1 | 1349714  | 1360518  |
| ERV-Spuma.a11-Ame | PGSH01008812.1 | 5983673  | 5988862  |
| ERV-Spuma.a12-Ame | PGSH01008910.1 | 34169    | 44350    |
| ERV-Spuma.a13-Ame | PGSH01015195.1 | 85161    | 93425    |
| ERV-Spuma.a14-Ame | PGSH01017662.1 | 306645   | 310263   |
| ERV-Spuma.a15-Ame | PGSH01019491.1 | 43209    | 47300    |
| ERV-Spuma.a16-Ame | PGSH01022653.1 | 643815   | 648455   |
| ERV-Spuma.a17-Ame | PGSH01022653.1 | 649552   | 655147   |
| ERV-Spuma.a18-Ame | PGSH01022702.1 | 672427   | 681080   |
| ERV-Spuma.a19-Ame | PGSH01023909.1 | 4301897  | 4306935  |
| ERV-Spuma.a20-Ame | PGSH01023909.1 | 4308211  | 4316186  |
| ERV-Spuma.a21-Ame | PGSH01023919.1 | 1782266  | 1788445  |
| ERV-Spuma.a22-Ame | PGSH01023926.1 | 30405    | 39752    |
| ERV-Spuma.a23-Ame | PGSH01025177.1 | 967861   | 971103   |
| ERV-Spuma.a24-Ame | PGSH01025178.1 | 5518044  | 5521398  |
| ERV-Spuma.a25-Ame | PGSH01026441.1 | 131750   | 142196   |
| ERV-Spuma.a26-Ame | PGSH01029025.1 | 1683076  | 1687173  |
| ERV-Spuma.a27-Ame | PGSH01030205.1 | 993950   | 1001601  |
| ERV-Spuma.a28-Ame | PGSH01032736.1 | 1117474  | 1120770  |
| ERV-Spuma.a29-Ame | PGSH01033995.1 | 972640   | 978255   |
| ERV-Spuma.a30-Ame | PGSH01034008.1 | 1396115  | 1401348  |
| ERV-Spuma.a31-Ame | PGSH01035224.1 | 4829807  | 4839514  |
| ERV-Spuma.a32-Ame | PGSH01035230.1 | 10592945 | 10597437 |
| ERV-Spuma.a33-Ame | PGSH01035230.1 | 10605747 | 10610588 |
| ERV-Spuma.a34-Ame | PGSH01036982.1 | 44567    | 50958    |
| ERV-Spuma.a35-Ame | PGSH01037750.1 | 9586908  | 9591575  |
| ERV-Spuma.a36-Ame | PGSH01037750.1 | 9602460  | 9607446  |
| ERV-Spuma.a37-Ame | PGSH01037795.1 | 441215   | 449694   |
| ERV-Spuma.a38-Ame | PGSH01039009.1 | 736658   | 741438   |
| ERV-Spuma.a39-Ame | PGSH01043872.1 | 13638    | 19084    |
| ERV-Spuma.a40-Ame | PGSH01046624.1 | 472273   | 477951   |
| ERV-Spuma.a41-Ame | PGSH01047791.1 | 1994291  | 1997564  |
| ERV-Spuma.a42-Ame | PGSH01047807.1 | 665304   | 673128   |
| ERV-Spuma.a43-Ame | PGSH01049050.1 | 16481460 | 16490136 |
| ERV-Spuma.a44-Ame | PGSH01049058.1 | 1894964  | 1902054  |
| ERV-Spuma.a45-Ame | PGSH01049058.1 | 1950661  | 1957766  |
| ERV-Spuma.a46-Ame | PGSH01050305.1 | 1869649  | 1876045  |
| ERV-Spuma.a47-Ame | PGSH01050305.1 | 1882929  | 1889312  |

|                   |                |         |         |
|-------------------|----------------|---------|---------|
| ERV-Spuma.a48-Ame | PGSH01051580.1 | 1077128 | 1087744 |
| ERV-Spuma.a49-Ame | PGSH01051633.1 | 2618829 | 2622168 |
| ERV-Spuma.a50-Ame | PGSH01051633.1 | 2623526 | 2628865 |
| ERV-Spuma.a51-Ame | PGSH01052865.1 | 992597  | 997697  |
| ERV-Spuma.a52-Ame | PGSH01054917.1 | 12397   | 18661   |
| ERV-Spuma.a53-Ame | PGSH01055349.1 | 9566365 | 9569774 |
| ERV-Spuma.a54-Ame | PGSH01057862.1 | 4793216 | 4796588 |
| ERV-Spuma.a55-Ame | PGSH01057870.1 | 4232904 | 4241020 |
| ERV-Spuma.a56-Ame | PGSH01057881.1 | 703789  | 709262  |
| ERV-Spuma.a57-Ame | PGSH01060410.1 | 827933  | 832837  |
| ERV-Spuma.a58-Ame | PGSH01062881.1 | 8654193 | 8663329 |
| ERV-Spuma.a59-Ame | PGSH01062896.1 | 3784661 | 3788417 |
| ERV-Spuma.a60-Ame | PGSH01062901.1 | 1178310 | 1181523 |
| ERV-Spuma.a61-Ame | PGSH01064163.1 | 1073398 | 1083889 |
| ERV-Spuma.a62-Ame | PGSH01065393.1 | 6957205 | 6962511 |
| ERV-Spuma.a63-Ame | PGSH01067909.1 | 1509927 | 1513403 |
| ERV-Spuma.a64-Ame | PGSH01067909.1 | 1700246 | 1704153 |
| ERV-Spuma.a65-Ame | PGSH01070491.1 | 99158   | 109904  |
| ERV-Spuma.a66-Ame | PGSH01071679.1 | 6588104 | 6592597 |
| ERV-Spuma.a67-Ame | PGSH01072403.1 | 1662    | 5885    |
| ERV-Spuma.a68-Ame | PGSH01072685.1 | 65496   | 68671   |
| ERV-Spuma.a69-Ame | PGSH01074283.1 | 326019  | 330747  |
| ERV-Spuma.a70-Ame | PGSH01075472.1 | 2710195 | 2716979 |
| ERV-Spuma.a71-Ame | PGSH01079228.1 | 746545  | 753238  |
| ERV-Spuma.a72-Ame | PGSH01081731.1 | 4076265 | 4080190 |
| ERV-Spuma.a73-Ame | PGSH01084338.1 | 572747  | 576511  |
| ERV-Spuma.a74-Ame | PGSH01085509.1 | 308613  | 319277  |
| ERV-Spuma.a75-Ame | PGSH01085530.1 | 5737018 | 5744714 |
| ERV-Spuma.a76-Ame | PGSH01086819.1 | 1064789 | 1074635 |
| ERV-Spuma.a77-Ame | PGSH01088054.1 | 326123  | 331822  |
| ERV-Spuma.a78-Ame | PGSH01091798.1 | 8331330 | 8337974 |
| ERV-Spuma.a79-Ame | PGSH01093946.1 | 7321    | 11182   |
| ERV-Spuma.a80-Ame | PGSH01095646.1 | 1332326 | 1341984 |
| ERV-Spuma.a81-Ame | PGSH01096895.1 | 4085    | 7987    |
| ERV-Spuma.a82-Ame | PGSH01099332.1 | 8461150 | 8468446 |
| ERV-Spuma.a83-Ame | PGSH01100611.1 | 2144219 | 2147769 |
| ERV-Spuma.a84-Ame | PGSH01101911.1 | 1027820 | 1034529 |
| ERV-Spuma.a85-Ame | PGSH01105615.1 | 111866  | 115558  |
| ERV-Spuma.a86-Ame | PGSH01107798.1 | 139949  | 144829  |
| ERV-Spuma.a87-Ame | PGSH01110649.1 | 5211457 | 5214522 |
| ERV-Spuma.a88-Ame | PGSH01111904.1 | 4678043 | 4684351 |
| ERV-Spuma.a89-Ame | PGSH01111946.1 | 3496631 | 3501789 |
| ERV-Spuma.a90-Ame | PGSH01111964.1 | 558823  | 563324  |
| ERV-Spuma.a91-Ame | PGSH01111964.1 | 569931  | 573478  |

|                    |                |         |         |
|--------------------|----------------|---------|---------|
| ERV-Spuma.a92-Ame  | PGSH01113211.1 | 3124537 | 3130660 |
| ERV-Spuma.a93-Ame  | PGSH01113211.1 | 3186483 | 3192927 |
| ERV-Spuma.a94-Ame  | PGSH01116945.1 | 3120342 | 3124437 |
| ERV-Spuma.a95-Ame  | PGSH01116968.1 | 4014285 | 4017766 |
| ERV-Spuma.a96-Ame  | PGSH01116988.1 | 469969  | 473094  |
| ERV-Spuma.a97-Ame  | PGSH01116988.1 | 491221  | 500666  |
| ERV-Spuma.a98-Ame  | PGSH01118041.1 | 3253    | 7879    |
| ERV-Spuma.a99-Ame  | PGSH01120713.1 | 2653730 | 2657003 |
| ERV-Spuma.a100-Ame | PGSH01120737.1 | 1147325 | 1152636 |
| ERV-Spuma.a101-Ame | PGSH01123219.1 | 4599142 | 4604089 |
| ERV-Spuma.a102-Ame | PGSH01123259.1 | 768141  | 773390  |
| ERV-Spuma.a103-Ame | PGSH01124477.1 | 2392164 | 2396241 |
| ERV-Spuma.a104-Ame | PGSH01124515.1 | 2103928 | 2108029 |
| ERV-Spuma.b1-Ame   | PGSH01013857.1 | 3716665 | 3724126 |
| ERV-Spuma.b2-Ame   | PGSH01022713.1 | 412568  | 419627  |
| ERV-Spuma.b3-Ame   | PGSH01039549.1 | 1       | 4596    |
| ERV-Spuma.b4-Ame   | PGSH01049260.1 | 13796   | 25687   |
| ERV-Spuma.b5-Ame   | PGSH01052820.1 | 1286669 | 1294732 |
| ERV-Spuma.b6-Ame   | PGSH01052855.1 | 1819277 | 1830789 |
| ERV-Spuma.b7-Ame   | PGSH01052855.1 | 1841230 | 1852739 |
| ERV-Spuma.b8-Ame   | PGSH01061660.1 | 1251738 | 1258069 |
| ERV-Spuma.b9-Ame   | PGSH01064174.1 | 2474792 | 2478237 |
| ERV-Spuma.b10-Ame  | PGSH01067933.1 | 1036349 | 1043201 |
| ERV-Spuma.b11-Ame  | PGSH01079222.1 | 380294  | 392002  |
| ERV-Spuma.b12-Ame  | PGSH01088166.1 | 10449   | 20384   |
| ERV-Spuma.b13-Ame  | PGSH01095560.1 | 5815558 | 5821922 |
| ERV-Spuma.b14-Ame  | PGSH01095560.1 | 5823376 | 5826854 |
| ERV-Spuma.b15-Ame  | PGSH01099775.1 | 196771  | 204944  |
| ERV-Spuma.b16-Ame  | PGSH01104359.1 | 6174362 | 6180900 |
| ERV-Spuma.b17-Ame  | PGSH01117526.1 | 90425   | 96126   |
| ERV-Spuma.b18-Ame  | PGSH01125197.1 | 1       | 6277    |
| ERV-Spuma.c1-Ame   | PGSH01013853.1 | 2765005 | 2768130 |
| ERV-Spuma.c2-Ame   | PGSH01030304.1 | 176750  | 179767  |
| ERV-Spuma.c3-Ame   | PGSH01040306.1 | 769718  | 773099  |
| ERV-Spuma.c4-Ame   | PGSH01044064.1 | 1430704 | 1433816 |
| ERV-Spuma.c5-Ame   | PGSH01047522.1 | 30545   | 33607   |
| ERV-Spuma.c6-Ame   | PGSH01049103.1 | 1960557 | 1963689 |
| ERV-Spuma.c7-Ame   | PGSH01052863.1 | 3352473 | 3355691 |
| ERV-Spuma.c8-Ame   | PGSH01073018.1 | 1756240 | 1760655 |
| ERV-Spuma.c9-Ame   | PGSH01100626.1 | 1691532 | 1706401 |
| exCFVrbi.1         | GFOG01006311.1 | -       | -       |
| exCFVrbi.2         | GFOG01069762.1 | -       | -       |
| exCFVrbi.3         | GFOG01077101.1 | -       | -       |
| exCFVrbi.4         | GFOG01077102.1 | -       | -       |

|             |                |   |   |
|-------------|----------------|---|---|
| exCFVrbi.5  | GFOG01077103.1 | - | - |
| exCFVrbi.6  | GFOG01077104.1 | - | - |
| exCFVrbi.7  | GFOG01078659.1 | - | - |
| exCFVrbi.8  | GFOG01078660.1 | - | - |
| exCFVrbi.9  | GFOG01079534.1 | - | - |
| exCFVrbi.10 | GFOG01079535.1 | - | - |
| exNFVtwe.1  | GESS01001565.1 | - | - |
| exNFVtwe.2  | GESS01002659.1 | - | - |
| exNFVtwe.3  | GESS01003942.1 | - | - |
| exNFVtwe.4  | GESS01005316.1 | - | - |
| exNFVtwe.5  | GESS01007562.1 | - | - |
| exNFVtwe.6  | GESS01007969.1 | - | - |
| exNFVtwe.7  | GESS01009667.1 | - | - |
| exNFVtwe.8  | GESS01011049.1 | - | - |
| exNFVtwe.9  | GESS01013777.1 | - | - |
| exNFVtwe.10 | GESS01017131.1 | - | - |
| exNFVtwe.11 | GESS01017642.1 | - | - |
| exNFVtwe.12 | GESS01018187.1 | - | - |
| exNFVtwe.13 | GESS01019137.1 | - | - |
| exNFVtwe.14 | GESS01019796.1 | - | - |
| exNFVtwe.15 | GESS01020812.1 | - | - |
| exNFVtwe.16 | GESS01021729.1 | - | - |
| exNFVtwe.17 | GESS01022913.1 | - | - |
| exNFVtwe.18 | GESS01025204.1 | - | - |
| exNFVtwe.19 | GESS01026764.1 | - | - |
| exNFVtwe.20 | GESS01027683.1 | - | - |
| exNFVtwe.21 | GESS01027743.1 | - | - |
| exNFVtwe.22 | GESS01029986.1 | - | - |
| exNFVtwe.23 | GESS01032245.1 | - | - |
| exNFVtwe.24 | GESS01034318.1 | - | - |
| exNFVtwe.25 | GESS01034453.1 | - | - |
| exNFVtwe.26 | GESS01034683.1 | - | - |
| exNFVtwe.27 | GESS01035964.1 | - | - |
| exNFVtwe.28 | GESS01040058.1 | - | - |
| exNFVtwe.29 | GESS01042189.1 | - | - |
| exNFVtwe.30 | GESS01045812.1 | - | - |
| exNFVtwe.31 | GESS01047392.1 | - | - |
| exNFVtwe.32 | GESS01047931.1 | - | - |
| exNFVtwe.33 | GESS01049718.1 | - | - |
| exNFVtwe.34 | GESS01050984.1 | - | - |
| exNFVtwe.35 | GESS01052035.1 | - | - |
| exNFVtwe.36 | GESS01053545.1 | - | - |
| exNFVtwe.37 | GESS01054044.1 | - | - |
| exNFVtwe.38 | GESS01056758.1 | - | - |

|             |                |   |   |
|-------------|----------------|---|---|
| exNFVtwe.39 | GESS01057315.1 | - | - |
| exNFVtwe.40 | GESS01057826.1 | - | - |
| exNFVtwe.41 | GESS01060880.1 | - | - |
| exNFVtwe.42 | GESS01067778.1 | - | - |
| exNFVtwe.43 | GESS01069249.1 | - | - |
| exNFVtwe.44 | GESS01070572.1 | - | - |
| exNFVtwe.45 | GESS01070828.1 | - | - |
| exNFVtwe.46 | GESS01071089.1 | - | - |
| exNFVtwe.47 | GESS01071383.1 | - | - |
| exNFVtwe.48 | GESS01071839.1 | - | - |
| exNFVtwe.49 | GESS01072787.1 | - | - |
| exNFVtwe.50 | GESS01073239.1 | - | - |
| exNFVtwe.51 | GESS01075865.1 | - | - |
| exNFVtwe.52 | GESS01075905.1 | - | - |
| exNFVtwe.53 | GESS01076856.1 | - | - |
| exNFVtwe.54 | GESS01080392.1 | - | - |
| exNFVtwe.55 | GESS01080711.1 | - | - |
| exNFVtwe.56 | GESS01081005.1 | - | - |
| exNFVtwe.57 | GESS01083141.1 | - | - |
| exNFVtwe.58 | GESS01085009.1 | - | - |
| exNFVtgr.1  | GHKF01001559.1 | - | - |
| exNFVtgr.2  | GHKF01001561.1 | - | - |
| exNFVtgr.3  | GHKF01002865.1 | - | - |
| exNFVtgr.4  | GHKF01002869.1 | - | - |
| exNFVtgr.5  | GHKF01002870.1 | - | - |
| exNFVtgr.6  | GHKF01002875.1 | - | - |
| exNFVtgr.7  | GHKF01016867.1 | - | - |
| exNFVtgr.8  | GHKF01016981.1 | - | - |
| exNFVtgr.9  | GHKF01016985.1 | - | - |
| exNFVtgr.10 | GHKF01028783.1 | - | - |
| exNFVtgr.11 | GHKF01029063.1 | - | - |
| exNFVtgr.12 | GHKF01029065.1 | - | - |
| exNFVtgr.13 | GHKF01029068.1 | - | - |
| exNFVtgr.14 | GHKF01029069.1 | - | - |
| exNFVtgr.15 | GHKF01034141.1 | - | - |
| exNFVtgr.16 | GHKF01034142.1 | - | - |
| exNFVtgr.17 | GHKF01034145.1 | - | - |
| exNFVtgr.18 | GHKF01034147.1 | - | - |
| exNFVtgr.19 | GHKF01055770.1 | - | - |
| exNFVtgr.20 | GHKF01056004.1 | - | - |
| exNFVtgr.21 | GHKF01056005.1 | - | - |
| exNFVtgr.22 | GHKF01056006.1 | - | - |
| exNFVtgr.23 | GHKF01056007.1 | - | - |
| exNFVtgr.24 | GHKF01056009.1 | - | - |

|             |                |   |   |
|-------------|----------------|---|---|
| exNFVtgr.25 | GHKF01056010.1 | - | - |
| exNFVtgr.26 | GHKF01056011.1 | - | - |
| exNFVtgr.27 | GHKF01056012.1 | - | - |
| exNFVtgr.28 | GHKF01056013.1 | - | - |
| exNFVtgr.29 | GHKF01056015.1 | - | - |
| exNFVtgr.30 | GHKF01056016.1 | - | - |
| exNFVtgr.31 | GHKF01056017.1 | - | - |
| exNFVtgr.32 | GHKF01056019.1 | - | - |
| exNFVtgr.33 | GHKF01056082.1 | - | - |
| exNFVtgr.34 | GHKF01056087.1 | - | - |
| exNFVtgr.35 | GHKF01056088.1 | - | - |
| exNFVtgr.36 | GHKF01056783.1 | - | - |
| exNFVtgr.37 | GHKF01056786.1 | - | - |
| exNFVtgr.38 | GHKF01056788.1 | - | - |
| exNFVtgr.39 | GHKF01056790.1 | - | - |
| exNFVtgr.40 | GHKF01057945.1 | - | - |
| exNFVtgr.41 | GHKF01057947.1 | - | - |
| exNFVtgr.42 | GHKF01057948.1 | - | - |
| exNFVtgr.43 | GHKF01061402.1 | - | - |
| exNFVtgr.44 | GHKF01061705.1 | - | - |
| exNFVtgr.45 | GHKF01069133.1 | - | - |
| exNFVtgr.46 | GHKF01069281.1 | - | - |
| exNFVtgr.47 | GHKF01070483.1 | - | - |
| exNFVtgr.48 | GHKF01076429.1 | - | - |
| exNFVtgr.49 | GHKF01082040.1 | - | - |
| exNFVtgr.50 | GHKF01083078.1 | - | - |
| exNFVtgr.51 | GHKF01083083.1 | - | - |
| exNFVtgr.52 | GHKF01083851.1 | - | - |
| exNFVtgr.53 | GHKF01084413.1 | - | - |
| exNFVtgr.54 | GHKF01084414.1 | - | - |
| exNFVtgr.55 | GHKF01087742.1 | - | - |
| exNFVtgr.56 | GHKF01087744.1 | - | - |
| exNFVtgr.57 | GHKF01104466.1 | - | - |
| exNFVtgr.58 | GHKF01104481.1 | - | - |
| exNFVtgr.59 | GHKF01104484.1 | - | - |
| exNFVtgr.60 | GHKF01109457.1 | - | - |
| exNFVtgr.61 | GHKF01112814.1 | - | - |
| exNFVtgr.62 | GHKF01112817.1 | - | - |
| exNFVtgr.63 | GHKF01115947.1 | - | - |
| exNFVtgr.64 | GHKF01115948.1 | - | - |
| exNFVtgr.65 | GHKF01115949.1 | - | - |
| exNFVtgr.66 | GHKF01115950.1 | - | - |
| exNFVtgr.67 | GHKF01115951.1 | - | - |
| exNFVtgr.68 | GHKF01115952.1 | - | - |

|              |                |   |   |
|--------------|----------------|---|---|
| exNFVtgr.69  | GHKF01115953.1 | - | - |
| exNFVtgr.70  | GHKF01115954.1 | - | - |
| exNFVtgr.71  | GHKF01115956.1 | - | - |
| exNFVtgr.72  | GHKF01115957.1 | - | - |
| exNFVtgr.73  | GHKF01115958.1 | - | - |
| exNFVtgr.74  | GHKF01121458.1 | - | - |
| exNFVtgr.75  | GHKF01121464.1 | - | - |
| exNFVtgr.76  | GHKF01121480.1 | - | - |
| exNFVtgr.77  | GHKF01121679.1 | - | - |
| exNFVtgr.78  | GHKF01121680.1 | - | - |
| exNFVtgr.79  | GHKF01121682.1 | - | - |
| exNFVtgr.80  | GHKF01121683.1 | - | - |
| exNFVtgr.81  | GHKF01121684.1 | - | - |
| exNFVtgr.82  | GHKF01121686.1 | - | - |
| exNFVtgr.83  | GHKF01139758.1 | - | - |
| exNFVtgr.84  | GHKF01139759.1 | - | - |
| exNFVtgr.85  | GHKF01139761.1 | - | - |
| exNFVtgr.86  | GHKF01139762.1 | - | - |
| exNFVtgr.87  | GHKF01139766.1 | - | - |
| exNFVtgr.88  | GHKF01139771.1 | - | - |
| exNFVtgr.89  | GHKF01139774.1 | - | - |
| exNFVtgr.90  | GHKF01142573.1 | - | - |
| exNFVtgr.91  | GHKF01145954.1 | - | - |
| exNFVtgr.92  | GHKF01145986.1 | - | - |
| exNFVtgr.93  | GHKF01145989.1 | - | - |
| exNFVtgr.94  | GHKF01145993.1 | - | - |
| exNFVtgr.95  | GHKF01146165.1 | - | - |
| exNFVtgr.96  | GHKF01146166.1 | - | - |
| exNFVtgr.97  | GHKF01146167.1 | - | - |
| exNFVtgr.98  | GHKF01148202.1 | - | - |
| exNFVtgr.99  | GHKF01152802.1 | - | - |
| exNFVtgr.100 | GHKF01152803.1 | - | - |
| exNFVtgr.101 | GHKF01153066.1 | - | - |
| exNFVtgr.102 | GHKF01154047.1 | - | - |
| exNFVtgr.103 | GHKF01154049.1 | - | - |
| exNFVtgr.104 | GHKF01156341.1 | - | - |
| exNFVtgr.105 | GHKF01156345.1 | - | - |
| exNFVtgr.106 | GHKF01164620.1 | - | - |
| exNFVtgr.107 | GHKF01164621.1 | - | - |
| exNFVtgr.108 | GHKF01164625.1 | - | - |
| exNFVtgr.109 | GHKF01164628.1 | - | - |
| exNFVtgr.110 | GHKF01164632.1 | - | - |
| exNFVtgr.111 | GHKF01164633.1 | - | - |
| exNFVtgr.112 | GHKF01164638.1 | - | - |



|              |                |   |   |
|--------------|----------------|---|---|
| exNFVtgr.113 | GHKF01164639.1 | - | - |
| exNFVtgr.114 | GHKF01165992.1 | - | - |
| exNFVtgr.115 | GHKF01165993.1 | - | - |
| exNFVtgr.116 | GHKF01165994.1 | - | - |
| exNFVtgr.117 | GHKF01179326.1 | - | - |
| exNFVtgr.118 | GHKF01179328.1 | - | - |
| exNFVtgr.119 | GHKF01179330.1 | - | - |
| exNFVtgr.120 | GHKF01179339.1 | - | - |
| exNFVtgr.121 | GHKF01179340.1 | - | - |
| exNFVtgr.122 | GHKF01179346.1 | - | - |
| exNFVtgr.123 | GHKF01179348.1 | - | - |
| exNFVtgr.124 | GHKF01179349.1 | - | - |
| exNFVtgr.125 | GHKF01179350.1 | - | - |
| exNFVtgr.126 | GHKF01179352.1 | - | - |
| exNFVtgr.127 | GHKF01179353.1 | - | - |
| exNFVtgr.128 | GHKF01179354.1 | - | - |
| exNFVtgr.129 | GHKF01179355.1 | - | - |
| exNFVtgr.130 | GHKF01179357.1 | - | - |
| exNFVtgr.131 | GHKF01179362.1 | - | - |

---

**Table S2 Information on the representative retroviruses**

| <b>No.</b> | <b>Virus name</b>                          | <b>Genus</b>      | <b>Abbreviation</b> | <b>Natural host</b>   | <b>Accession no.</b> |
|------------|--------------------------------------------|-------------------|---------------------|-----------------------|----------------------|
| 1          | Avian leukemia virus                       | Alpharetrovirus   | ALV                 | Chicken               | NC_015116            |
| 2          | Lymphoproliferative disease virus          | Alpharetrovirus   | LDV                 | Turkey                | U09568               |
| 3          | Mouse mammary tumor virus                  | Betaretrovirus    | MMTV                | Mouse                 | NC_001503            |
| 4          | Mason-Pfizer monkey virus                  | Betaretrovirus    | MPMV                | Primate               | NC_001550            |
| 5          | Simian retrovirus 1                        | Betaretrovirus    | SRV1                | Primate               | M11841               |
| 6          | Bovine leukemia virus                      | Deltaretrovirus   | BLV                 | Cattle                | NC_001414            |
| 7          | Human T-lymphotropic virus 1               | Deltaretrovirus   | HTLV1               | Human                 | NC_001436            |
| 8          | Simian T-lymphotropic virus 2              | Deltaretrovirus   | STLV2               | Non-human primate     | NC_001815            |
| 9          | Walleye dermal sarcoma virus               | Epsilonretrovirus | WDSV                | Fish                  | NC_001867            |
| 10         | Walleye epidermal hyperplasia virus type 1 | Epsilonretrovirus | WEHV1               | Fish                  | AF133051             |
| 11         | Walleye epidermal hyperplasia virus type 2 | Epsilonretrovirus | WEHV2               | Fish                  | AF133052             |
| 12         | Atlantic salmon swim bladder sarcoma virus | Gamma-epsilon     | SSSV                | Atlantic salmon       | NC_007654            |
| 13         | Feline leukemia virus                      | Gammaretrovirus   | FeLV                | Cat                   | NC_001940            |
| 14         | Friend murine leukemia virus               | Gammaretrovirus   | F-MuLV              | Mouse                 | NC_001362            |
| 15         | Mus dunni endogenous retrovirus            | Gammaretrovirus   | MDEV                | Mouse                 | AF053745             |
| 16         | Porcine endogenous retrovirus A            | Gammaretrovirus   | PERV-A              | Pig                   | AJ293656             |
| 17         | Rhinolophus ferrumequinum retrovirus       | Gammaretrovirus   | RfRV                | Greater horseshoe bat | JQ303225             |
| 18         | Equine infectious anemia virus             | Lentivirus        | EIAV                | Horse                 | NC_001450            |
| 19         | Feline immunodeficiency virus              | Lentivirus        | FIV                 | Cat                   | NC_001482            |
| 20         | Human immunodeficiency virus 1             | Lentivirus        | HIV1                | Human                 | NC_001802            |
| 21         | Visna/Maedi virus                          | Lentivirus        | VMV                 | Sheep                 | NC_001452            |
| 22         | Bovine foamy virus                         | Spumavirus        | BFVbta              | Cattle                | NC_001831            |
| 23         | Equine foamy virus                         | Spumavirus        | EFVeca              | Horse                 | NC_002201            |
| 24         | Feline foamy virus                         | Spumavirus        | FFVfca              | Cat                   | NC_001871            |

|    |                                              |            |               |                            |              |
|----|----------------------------------------------|------------|---------------|----------------------------|--------------|
| 25 | Brown greater galago prosimian foamy virus   | Spumavirus | SFVocr        | Greater galago             | KM233624     |
| 26 | White-tufted-ear marmoset simian foamy virus | Spumavirus | SFVcja        | Common marmoset            | GU356395     |
| 27 | Squirrel monkey simian foamy virus           | Spumavirus | SFVssc        | Squirrel monkey            | GU356394     |
| 28 | Orangutan Simian foamy virus                 | Spumavirus | SFVppy        | Pongo pygmaeus<br>pygmaeus | AJ544579     |
| 29 | Macaque simian foamy virus                   | Spumavirus | SFVmcy        | Macaque                    | NC_010819    |
| 30 | African green monkey simian foamy virus      | Spumavirus | SFVcae        | African green monkey       | NC_010820    |
| 31 | Western chimpanzee simian foamy virus        | Spumavirus | SFVpve        | Western chimpanzee         | NC_001364    |
| 32 | Western lowland gorilla simian foamy virus   | Spumavirus | SFVggo        | Western lowland gorilla    | NC_039029    |
| 33 | Spider monkey simian foamy virus             | Spumavirus | SFVaxx        | Spider monkey              | NC_039027    |
| 34 | Sloth endogenous foamy virus                 | Spumavirus | SloEFV        | Sloth                      | ABVD02350954 |
| 35 | Sphenodon punctatus endogenous foamy virus   | Spumavirus | ERV-Spuma-Spu | Tuatara                    | Ref. 1       |
| 36 | Coelacanth endogenous foamy-like virus       | Spumavirus | CoeEFV        | Coelacanth                 | Ref. 2       |
| 37 | Amphilophus citrinellus fomy-like virus      | Spumavirus | AciFLERV_1    | Midas cichlid              | CCOE01002251 |
| 38 | Amphilophus citrinellus fomy-like virus      | Spumavirus | AciFLERV_2    | Midas cichlid              | CCOE01002087 |
| 39 | Austrofundulus limnaeus fomy-like virus      | Spumavirus | AliFLERV      | Annual killifish           | Ref. 3       |
| 40 | Notophthalmus viridescens                    | Spumavirus | NviFLERV      | Eastern newt               | Ref. 3       |
| 41 | latyfish endogenous retrovirus               | Spumavirus | PlatyfishEFV  | Platyfish                  | Ref. 4       |
| 42 | Danio rerio foamy virus                      | Spumavirus | DrFV-1        | Zebrafish                  | CABZ01054182 |
| 43 | Cynops pyrrhogaster fomy-like virus          | Spumavirus | CpyFLERV_1    | Japanese fire belly newt   | FS313726     |
| 44 | Cynops pyrrhogaster fomy-like virus          | Spumavirus | CpyFLERV_2    | Japanese fire belly newt   | FS296312     |
| 45 | Pleurodeles waltl fomy-like virus            | Spumavirus | PwaFLERV      | Iberian ribbed newt        | JG015238     |
| 46 | Poecilia reticulata fomy-like virus          | Spumavirus | PreFLERV      | Guppy                      | AZHG01028727 |
| 47 | Poecilia formosa fomy-like virus             | Spumavirus | PfoFLERV_1    | Amazon molly               | AYCK01023761 |
| 48 | Poecilia formosa fomy-like virus             | Spumavirus | PfoFLERV_2    | Amazon molly               | AYCK01027102 |
| 49 | Larimichthys crocea fomy-like virus          | Spumavirus | LcrFLERV      | Large yellow croaker       | JRPU01021077 |

|    |                                                      |              |            |                       |               |
|----|------------------------------------------------------|--------------|------------|-----------------------|---------------|
| 50 | <i>Stegastes partitus</i> fomy-like virus            | Spumavirus   | SpaFLERV   | Bicolor damselfish    | JMKM01038484  |
| 51 | <i>Fundulus heteroclitus</i> fomy-like virus         | Spumavirus   | FheFLERV   | Mummichog             | JXMV01100753  |
| 52 | <i>Lates calcarifer</i> fomy-like virus              | Spumavirus   | LcaFLERV   | Barramundi            | LBLR01010097  |
| 53 | <i>Gadus morhua</i> fomy-like virus                  | Spumavirus   | GmoFLERV_1 | Atlantic cod          | CAEA01131311  |
| 54 | <i>Gadus morhua</i> fomy-like virus                  | Spumavirus   | GmoFLERV_2 | Atlantic cod          | CAEA01539013  |
| 55 | <i>Dicentrarchus labrax</i> fomy-like virus          | Spumavirus   | DlaFLERV   | European bass         | CBXY010016181 |
| 56 | <i>Oreochromis niloticus</i> fomy-like virus         | Spumavirus   | OniFLERV   | Nile tilapia          | AERX01018483  |
| 57 | <i>Cynoglossus semilaevis</i> fomy-like virus        | Spumavirus   | CseFLERV   | Tongue sole           | AGRG01002780  |
| 58 | <i>Sebastes rubrivinctus</i> fomy-like virus         | Spumavirus   | SruFLERV   | Flag rockfish         | AUPQ01030678  |
| 59 | <i>Sebastes nigrocinctus</i> fomy-like virus         | Spumavirus   | SniFLERV   | Tiger rockfish        | AUPR01019601  |
| 60 | <i>Pimephales promelas</i> fomy-like virus           | Spumavirus   | PprFLERV_1 | Fathead minnow        | JNCD01073002  |
| 61 | <i>Pimephales promelas</i> fomy-like virus           | Spumavirus   | PprFLERV_2 | Fathead minnow        | JNCD01029789  |
| 62 | <i>Thunnus orientalis</i> fomy-like virus            | Spumavirus   | TorFLERV   | Pacific bluefin tuna  | BADN01112239  |
| 63 | <i>Periophthalmus magnuspinnatus</i> fomy-like virus | Spumavirus   | PmaFLERV   | Mudskipper            | JACL01052273  |
| 64 | <i>Periophthalmodon schlosseri</i> fomy-like virus   | Spumavirus   | PscFLERV   | Mudskipper            | JACM01000693  |
| 65 | <i>Anoplopoma fimbria</i> fomy-like virus            | Spumavirus   | AfiFLERV   | Sablefish             | AWGY01041462  |
| 66 | <i>Cyprinus carpio</i> fomy-like virus               | Spumavirus   | CcaFLERV   | Common carp           | LN590673      |
| 67 | <i>Nothobranchius furzeri</i> fomy-like virus        | Spumavirus   | NfuFLERV   | Turquoise killifish   | JNBZ01063262  |
| 68 | <i>Esox lucius</i> fomy-like virus                   | Spumavirus   | EluFLERV   | Common pike           | AZJR02000232  |
| 69 | <i>Callorhynchusmilii</i> fomy-like virus            | Spumavirus   | CmiFLERV_1 | Australian ghostshark | XM_007890932  |
| 70 | <i>Callorhynchusmilii</i> fomy-like virus            | Spumavirus   | CmiFLERV_2 | Australian ghostshark | AAVX02030290  |
| 71 | <i>Hynobius retardatus</i> fomy-like virus           | Spumavirus   | HreFLERV   | Hokkaido salamander   | LE148029      |
| 72 | Snakehead retrovirus                                 | Unclassified | SnRV       | Fish (snakehead fish) | NC_001724     |

1. Wei X, Chen Y, Duan G, Holmes EC, Cui J. 2019. A reptilian endogenous foamy virus sheds light on the early evolution of retroviruses. *Virus Evol* 5:vez001.
2. Han GZ, Worobey M. 2012. An endogenous foamy-like viral element in the coelacanth genome. *PLoS Pathog* 8:e1002790.
3. Aiewsakun P, Katzourakis A. 2017. Marine origin of retroviruses in the early Palaeozoic Era. *Nat Commun* 8:13954.
4. Ruboyianes R, Worobey M. 2016. Foamy-like endogenous retroviruses are extensive and abundant in teleosts. *Virus Evol* 2:vew032.

## Data set S1. The nucleotide sequences of consensus genomes of 4 EFVs

>ERV-Spuma.a-Ame Consensus Sequence

TGTCATGATTTACAAAGGTTACAAACGAGTTAAGGCAGGTGTGCCACAGAC  
TTCCTAACCACAGATTAGCAGCCGTTGGTCTTCAACGRCTTAATGCCTTGAA  
AATACACGTGGTCTTGACACCATCATAGTAATAAGCTATGGATGTTCTTTGG  
GCAAAAAAACTCATTACACACAATGCAAGTGTGGCTTTCAAGAGACAG  
AATCGGACACTAACTGTAAACCCACAGGCACTTGCCCTTAGGGTCAGCTAA  
AGGGGAACAGTTTCCCTCCTTAAGCCAGCCACAAGTATCAGCTTCCCTGTGTT  
AGATGGRCTCGTAGCAGAAAGCAGCCATAGACAGGAAGCAGGGTACCAGA  
ATACATGTGTGGTTAAAGCGTCCAAAGCAATAGTCACATTTAAACCCCTTCA  
GAAAACGCATTCAATATAATGGCATTTCGAAGTAGGCCAGAAAAAATACAGC  
ACCTTGCCTGTTCTTCGAGCGGAAGGCCATGCATTTCAATGGAAATAATCA  
AGAAGCAAGGACATCACCTTTCCTTGGGTTCTCACATAGGTAAATAATGT  
GTGCACTGCAAACCGAAGTATAAGAGCAGATTCAGACTCTAGACTTTCTCT  
CCAGATCGAGGAAGTGACGCACATAGTACATGTAGGCTAAGTCACGGGTGT  
TAATATAAAAGCACAACAGACTAAGGCTDAGCGAGATTCCCAGCAGGCAG  
CAGGCAGACCAHAAGATYGTGGGGGGTTGGGAAGAGCADKYGMTAGCAG  
GTCGGAGCAGCAAGCCCWGGATACCGTGAGTTTTAAGTGTGTTGGTTGAA  
CCTCTYTTGCATATGTTAGACTGACGGCGTGTTTTATTATGTCACTCCACTCC  
TGATCATACCATAGTATAGCTTAGACAAACATAACATGAACTCCATGATTGC  
TCAAGCTGGTGTTCAAAATGATGAATTGTACTTTATCTTTGTTAAATGCAA  
ATCATGCTTATAGCTTATGCAACAATGCTTTTTCTCTATCTGACAGTATGCTAT  
GTTTTACTGCGTTAATTATAGCAGGTGTAATGATGATCAAAGCTGGTAGAG  
AACAGAAGTGATATTAATATATTGACTTGCTACCTTCAAGTGTGAGCTTCA  
TATTTCTGAGTAATGCTTCATAATGAGGTCTCTYTGAGTCAAASGAACTAC  
ACAATATTTCTGGCTGTATTTTGGTCAATTATGTCAAGGGGTGCAAACACT  
CAGGGAAACTGTCAAAGCGCTAGGCCAAACCCCTGAGGCGCCTCTCATCA  
TAAATTAAGACTTTTGATTCTGTGCCACTCCACACAGCCCTACCTAGGGTS  
GAGGGRGGGGGCAGGGAATCACGCCCTAAGGGGCAATCAAGTCAGATGGC  
ACCCCAAAMAGATGGGACGTCTTAGAGATGACCAGAGCATTACTAATATTT  
AAATAACCTCATGTCCAGTCACGGGAGAAGGACAGGGCAGAAWTTTTTT  
TTTCTAAAASGTTTTTTTTAAATAAGAGGTTAGAGTGCGTACAGAAGATGG  
CGCACAATGAAATCAATATCCCATCCATTGCAGAATGGCTCTATATGATTGG  
CTGAGAGCTGCGCACTGTCATGCAGTGAACACAAATTCACAGTAGCAGT  
GGCGCAACTTGGTGGACTACCAGCAGAATCACTCTTACTTACTTAAAGAC  
CCCAGCTAACAGGACAAATAATGTATATGCAACTCTCCTAGTGAGRGGAGA  
CTTAGACACCATTCAGTATCGCCCATAACAGTATCCTGAATTGGCTTTAACA  
CATACAAATCATGTCAACTGGTTTGGAGGTAATCTAGTTTACCCACAAACA  
GGTGCAAGGCATGGCCATTAGCTACACCCAATCTGTCACTAGAATTCTTAG  
CCCGGTTTCATCAAACCGTGGAGGTCCATTTTTGCAGGCTGACTACCAAT  
TGTTAGCCACCCACTTTGACACAGTGCGAAACATTGCGCTGCAATATGCAG  
CTCAGCAGGGTATAGCACCTGCGCAGCAACCTCAAGGACAGATGGATGCA  
GGTGGGGTACAACACTACAGACATTGAGAATAATATTGGGATCCTGTCCATCCA

AGAATGAAGACATTCCCAAGTGGTATTCAGAAAAATTAGGACAATTGCAAG  
CTGCTTATCCACAAGTAACTCCCCAGCACAGACACAGGGCCCTAGCTATGT  
TTCTTCCATCTGGCTGCACACCGCTCTAGCGAGCTGTGACAGCTGGATCT  
CAATCTATAGCTGGCTTTATTTACAGCTGATAGGCACGCCGTCCATCACATC  
ACTAGCACTGATACTAGCTGACATCATGGGAACACAAGGCGCGGCCGCAG  
CCATGAATCTAGGCCTGTCTATAGCATCTAACAATTATCAAATGGTTGAGAG  
CATAATCCTACCCTTATTA AAAAGGAGAGCCTGCAAGGTTAGAAGTCCATAG  
AAAATTGTCCCAATTAATGAGCAAGAAAAAGGGAGCAATTTGGAGACA  
TAGTGACATCCACCTATCAATCATTGGGCAGGGATCACTTGGGCAGAAGAC  
CAGCAGACACACAGAAAAAGGGTAACAAGGATCTTAAGCCAGATAAGGAC  
ACACACCATGAAGGGAGATCCTCGAAAGGACGGGGATCATTCCAGGGTAA  
AAAGGGCAATAAGCCACAGAGGCGGCAATTGTCACCCATAGAGGAAGAAA  
GATATCCAGAGCATGGGCATAAAAATGAGAAATCTGCAGGAGATAGGCAGA  
GCCCCGAGTGGCAAGGTAACCACAGGGGTAGACGGTCCTGGGGTAAGACC  
GGGGGCCAGTCCCATTTTAGACCTACTGACTATGATTTTAGAGACAGGAAA  
CACATGAAAAGTCCCCAGAAGTACGGCACTGATGAGACTTCATCTCCTTCC  
CAGCAGGCACGAACACCAGATCGTTCTAAGGCTGAGGGGAAGGAAGTGA  
AGGTTGAGAAAAACACACGGCAGCACTACAGGTTTCACAGAATGCAGAG  
TCCACGCACTCATCGCATCGTTCCCAAGACTAAGCGACACACTGATTGGAT  
TGAGGTCCTATTAGACTCTGGGTCTGACATTTCCATATTTGAATGCAGCCAC  
AAGGCACTATTGGAGCACACAAGGGCACACAGGAATGCACAGATCACTAC  
TCCCCTGGGCAGACATTGGCACATAATGAAGTGTATTTTGTAACAATTCAG  
CTAGAAGGCGAACACCCCAAAAAGATTGAAGCACTATTTTGGCCACAGCT  
ACACATTCAATATAAAGGGCTGTTAGCATTTCAGACTGGCCACCTTTGTAT  
GTAAGGCAAGCACCAAGGGGTGAAGAAGTGGTAATGCCTGCCTTTTCAA  
AGAGGTGAGTGGGGAACTAATGCAAAAATATGCAAGAAAATGGTCAGCGC  
TGGCAGCAGTGCAGCTGTTTAAAAATCATGTAGGGCATGATAAAGAATGTC  
CAGCACATGTGATTCCAGTGCTGAAACCACCCCGCCACAAAGGCAGTATC  
CAGTTAAACCACAGGCAGTTGCCACATGCAAACCATAGTAGACCAGCTAA  
TGGACCAGGGAGTAATCATAAAGCAAGCTAGCCACATAACAGTCCCKGTGC  
TCCCAGTTTTTAAAACCTGATGGTACCTACCGTTTTATTGTAGATTTTAGAATT  
TTGAATGCACATTGTAAGACAGAGGCCGTCCAGAACCAACACAGTTCTGG  
ATTGCTAGCCAACTTACACAGATGCAAATATAAAAACAAACCTTGATCTAGGC  
AATGGGTATTTACACAAACCTTTAAGTGTAGAAAGCCAGAAATACACTGCA  
TTCACKTTTAAAGGGAACCTCATTTCAGTTCACTAGAATAATGCAGGGGTATA  
AAAATTCACCTAGCACATTCTCAAGCAGAATACAGAGCTTACTTGCAGACA  
TTCCTAATTGTTGGCAGTATGTAGATGATATTTACATCACCCATGAGAATCTC  
AGTGAACACTTGCAAGAAGTAGACAGAGTCATTACACGTTGGCTGCAAA  
AGGATACCTGATTAATTTAAAAAATCAAGAATAGCTCATCGTGAGGTTACC  
TTTCTGGGATTCCTCTTTCAGATGAGGGCAGAGGGTTGTCAGCAGATTTT  
CTTGAGAAGTGTGCCAATATAAGACCGCCACTACGCTTAGGCAGTTACAG  
GCCATTCTAGGGCTGTAAATTTTGGCAGATCGTATGTTTCTAATTTTGCTGA  
GCTAGTGAAACCATTGTATGCTTTGATAAAAACCAATTTCAAGGCAGCTCA  
CTGGCTGCCAGAACACACTCATATTCTGCACCAGGTATATTCATTAATGACT

CACACTGGTCCTTTGCAGGACAGGAATACAGATAAAGACTTAGAGATAAAC  
CTTGTGGTGGGAGACAATGCTTTCACATACACAGTGTGCAATCTAGGGGAG  
ACTAAACCAATTGCATATAAGTCACATGTATATCCACACCTGAGTTAAAAT  
TTACACCTGAGGAGAAAATTCTGGCTTCAGTTCAGATGATTATTCAGAAAG  
AGAGACCACTGGCAGCAAATAGAACCATACACATAAACACACCTTTAGCTC  
AACTAGAAGCTGCCACAAAAGCTAGCGTCCCAAATGCAAAAAGCATTACAC  
ACTAGATGGATTCAATGGTCAGCATCTCAACATGCTCCAGATGTAAAGTACC  
ATTATAAGGCAGAATTGCAAAGACTGAGTGGATTGAGTTGGACAATGGACA  
CAGAGCCAGACATCTCACGGCCTGACATACCATTGTTTGATTTTTTCCAGGT  
GATTTACTCAGATGGGTTCAGCTATCCCAGCAGTGGGGACACGGTCTAAGTA  
CGCTGCCGCATGCGCAGCAGTCGTAGGATACTTCACACATGAAGAAGAATT  
TATACATACTGATATTGCAACCAAGCACCTGGGAGACATGTCTGCCAGACT  
GCTGAATTGCATGGGTTACTACTTGCATTGCGCCAAGCAGATTCAGGGAAG  
CCCCTCTAGTAGTCTCAGATTCAGATTACATTGTCAGGGCTTATAACACTG  
ACTTGCATTGGTGGATGCAAAATGACTTCAAAGACATTAGGCATAAACTA  
TTGCTTCCAGGCAGCTCTGGAAGCAGGTTTGGGATCTTAAACAGACTTGCC  
CTTTACTATGGGTAATGCACACAAGAGCACATACCAAAGGGCACATTCATA  
GCACTGGCAATGCATTGGCAGATAAATATGCCAAAGAGCACACAGTGAGA  
AAAACAATAGCAGCCATAACTCGCTCAGCGACTGCAATGGATGAGGAAATA  
AAAGAGGCTTGTTTAGGTATTGTACCTAGGCCAAAAGGTTTCCCCAGTAAT  
TATATGTATGACATTGAAAATAATAGAGCAATAGTCACAATCCCTATGAAAA  
AAGGGGATCCTATTCAAAGATTAATACCAAATAGAGCAGACAGGGAAAAG  
CTGATTGCAGCCACACACGCTGGACTTGCATCTACCCATTTTGGGGTGAGT  
GCAACTGCACAGCTGCTCCTTGATCGCTTCTGGTGGCCAGGGCTTCGACAG  
CAGGTGAAAATATATATTGCAAACCTGTGACACATGTTTACAGACAACCTGTG  
GACCACAGCAAAAAACCTAAGGAGGTTCCTTTGAGAAAGGCAGCCTCGCC  
CTTTGAGATCCAATATATGGACCATATAGGCCCACTACCAGCAGTAAACAAG  
TACAAGTACATTCTAGTAATAGTAGATTCTTGCCTAGGTTTACCTGGATGAT  
TCCTCAAAGAAAGCAGACTGCAAATCAGTCATACAGGCACTTAGGACTG  
TAGTAGCCATGACAGCAACTCAAACGTTCCATGCTGACAATGGTCCAGCTT  
TTTCGGGGCGGGCCCTGAAGAAGGCATTAGAGGCATGGGGAACAGAGATG  
CATTTCTCACACCCATTCTCGCCGAAATCGAACGGAATTGTGGAGAGGGCA  
AACCAGTCTGTAAAAATGGGCTTGACTAAAAGCATTCTGTCATTGGGGGGG  
AACTGGSTAGACCATGTGCCTTTAGTGATCAGGAGTGTGAATAATTTACCAC  
GCCAGTCTCTATGCAACGGTAAGACCCCATTTGAACTCTTGTTTGGGAGAA  
AGATGTATATGCCTGACCTGCATGCTCTTCCCAGCCCCATACCCAGGAACGA  
GCAACTGCTGGCGACAACGCTGCTGAGGGAATCCCTCCAGGTGGAAGCTG  
CTGAGGCCAGTCCTGAGAACACTCTCAAAGCAGGAGATTGGGTCCTGGAA  
AAGATCCATGACAAGACTCCATTTGGCCCGTCTTACAGACCAGCAGTGCAA  
GTAATCAGAGTGAAAGGTTCCAGAACTGCCATCCTACCCGCAATACCACCT  
AAGAGAGGTACTAGGCAAGTTTCTGTGGACCACCTAAAACCTGTGCCAGA  
TGGTTTCCGCAATGTTTCCACGGAACCTCCCTCTTCCAAGTGAGGAGCCCA  
CGGAAGATGAAGAAATGGAGATCCGGCAAATGATGATGATAGGTGTGCAA  
GATGGGGAAGAATATGCCACTCTTGATTACACGTCCACAATTCAGGAAAGT



ACTGCAAGTCTGCCAATTTGGAAACAGAAAGCCTTCCAAGTTGCTAAAGT  
GATGAAAGAATTCTTTTGGACAGACTTCCTAAAACGGTGTATAAAATACT  
GGCAGTGTATTTCTCCTACTGTGGTTCAGCCTCATTTTATTCTTCATCTCAC  
TGACTTCTGGGCATTTTCTGAGCAAGGTTTCCACTCCACCTGTAAGCAAAG  
AAGTTGTTCTAAAGCCTTTAAGTTCTTCACACATGTTAGAGAAAAGAGAGC  
TCCCAGAGCCAGGAACTCCAGTCTCAATACAAATGTTTCCTCTAACTATGG  
GTCACGTGTGGATGCCATCATTCAAGACCTATAATGGCCCAGCAACACAGC  
TACAAGTCCACACCTTTTCTGTGATTGATGAATCCAGACTGTTTGCACCCAG  
TAATCCTGTGTCTAGAACATACAGAGAACTGTTAAGAAGTAGGCTTCAGAC  
ATTTGCACAAAATGCATTATTTGATGTGTTTGTGATGATGTGGAGGACCTCCAT  
GAAATGGGGCCCCATGTGTGTTATGTGCGATATTACAATGCCTTTTTACTTGT  
CAAACGTGAGCCAATTCTGTGGCCTAAATACACATTCTGGGAACACTGTGC  
AGTGCCTTTCCAAACTGATAGTCCTGAATTCAAAGCACAGTTCACATATATT  
TCACTGAGACCATATCAAGCAGGGGATTACATGTTTGAAAATCAGTACAAA  
TTCCCTCCTGAGCCACATGATGCACAACATATGTATGTTGCAGATTCAGTCA  
TCTTTGACAGAGAATACTTTGCAAACATGACTGAACAAAACATGGCGGGGA  
ACTGTCCCTCTATGGTCTACTTGGGGTCAACAGATATGGCAAATTAAGGG  
GTTACACAGTTAGATATGGCTTGTAGGTTCCACATTTAATGTATTTCTTAAA  
TTATACGCAGTTCCAGACCACTTGCAGCAATAGGAACCTGAGTTTCTACCC  
TGAATGGGAGAAAACAGAAGGTGAGTTCTGGAGTGCCTATAGAGAAG  
CAAAGAACGCAATGGCACCAAGCATATTACTTATGCATCAGGGGGACCTG  
TGTTATGGGCGGTTCAAGCAAATGAATGCAATAAAAGAAAAGCAGGACTC  
AGTGTGGGCCCATATAGGGCTTGGAACTCCCATAACACCTCCCTGACACAA  
GCTATATCAATAGGTAAGCTGTGCCAAGGAATGCTTTCACAATATCACCTGA  
GTGAGGTGATACAATCTCTAGATAACTTCATAAAAGAAGAGAATTGGACAG  
CTATCATGCAGTCAGCTGCTGGTCTGAGGCGCACCCAAAGTGGGCGTGTCA  
GGAGAGCAGCTACCTGCACCACCTCTGACCCTAGYGTACCTTGTGAGGTG  
GGACAAGCATCCATAACAGGAAAAACTTACACTTGGTCACAAGCAATAATG  
CAAATCCTGCAAAGTGAAGTGAGGCAGTACAGCGAGGATTTTCATGTTTCA  
GATGCTAATGATCAAGCGCTACAACAAGGCTTCTATGCGCTAAGAGATGTC  
ATAACAGATGTTGTGGGTTTGATTCAAATGACTTATCTATCATTAGAAACG  
ACCAAGAGGCCTCAGTAAGTCTTTCTGTAGTAACTGATTTTTTGGACACTCT  
CAGCAGAGGAGTCCCAGATTGGAATGTGATTTTCATGGCCTGAACAAATACA  
GGCACTTAACTTGTCCAAGGTTGCAACACGCCAGGCAATGTCCGGCTCCAC  
TTTCTTATTGCTTAGTGTGTTAGCAAAGAGTGTAGTGGCAGCATCTGCTTGG  
GCGTCAGGCTCCACAAATTGGATAGTGCACGGGGTACTAGACATTCCCATT  
CAAACAGCACCTCTATCATATGTCAAGAATTACACTCTTGGGGTAATGTAC  
ATTGGGTGAATGATACGTGGATCAGAGAAGATTATGTGGTACCATATTCACA  
TGCATGTGTGTCATCAGCTAGGCCTGAACTGACACTGTACTCATTACGTGAT  
TGCAAAGGTTCTACTAGAATAATGTGTGAACATGCTGAGCCAGTGAATTCC  
TGTGACAGTAACTCGAAATGCACACTGCATATTGCACCAATTGACTCATTCT  
ACTGTAAAGCACATAGATTGCAAATGGTTCATATTTGGTGCATTTCAACCA  
ATCTTGCTGTCATGTCCCAATAGGAATACCAACTCTGATCACCGTAGGCACA  
CAAGTTAAATGCTGTGGGTTTCAATTTGGATCCACCTAGCCATTTCAATTGA

AATCATTACACTGGCCTGGCTTCAATTTACAAAACTTGAGTACCCGAAATT  
GAGTTTATACATAGCAAAGCTGTAAAAATGCGGTTGGAAGTGTGAAGTAC  
TGAAGATACTATCTGCAAGCACACTCCGCTGTGGTCAAACAGATTGCATC  
TCTGCTAGGCTCCGAACATAACAAGGCAGGAAGCCTTGCACTCTCTGATTGA  
CAGCTCACAGTTTAATGGGGCCAATACTGGCCTTTCTGCAATCACTAAAGT  
AGCTTCGAGTCTCCTACATAAAGGGCTGATTGCCTTGGACACAGTCATTAG  
AACATTGACTTCGTCGAGTGCTTGGTACAGTTGGCTGCTGATAATACCTGG  
ACTTTTTCTCATATTTTGCTGTAGACACTGAAAATTATGACAAGCCACAGAA  
TTACGGCCCTGGAAGCAACCCGTCTCCGGTACAGAACAGAGCTGTGCAGA  
CGTATGGGATATGAGCAGTGTTCACTGTTTCAAAGCATTATTTTSTCATT  
RACCAGGAAGAARTCTACYGTGTCAGCCATCGCTAAGTGCYAGTSTGTCA  
CCARGARTCATTGCTTGCMAAGAACGTGGGAGTYRCAGCSTCRCCTTCTAG  
ACTGCCACTGTGGCKCAATAGAATCTCCAGGACATTGGCTGTGCATAGAGA  
CATTTGYGGMATTCAGAGGTACTTCCACAAGTATTCTATTGTGAGTTCATT  
GAGAGTCCCTCTGACACCRGCGCTGATAATGGGGKCATGCCAGAGCAAGA  
GAAACTGCKCAGAGAACGAHRWAAGCGATTATTGCCMAATGCATCCAGCA  
CYYCCAMSSGCATTACCAAGGAAGCACCTGGTCCCTCTGCATCACAGCCG  
GACCCAAGTAAGCCACAGAATGATCGATGCATGCTCTCAAACCCAGACCAC  
AAGGCAGCTGGGGAAGCAAACGATGCAAATGASGGATTCCTCTGGTTCCA  
AGAATACATGKCAGAAGGRAAAAATGCCTAAAASAGTGCRCAGYGATGAC  
ATGAGCATTCTGTTCTTCTCCGCAATGCTTCTTAACSTACCTCAGAAAGA  
GACTYGCTTTAATTCAGTGYTCAGAACACCTGACATTCTACACAGGTCAT  
CYAAGCAAGCTGCTCAGTCAGACAGCACTGAACTGAAGAATTATCACATTC  
TACCTCAAGATGCAARTATGAATGCAAAGCAAACATATGAACTGGATGACC  
TCCACGTGCTGATCGCTGTGAGTGACAAAGACACTCACATACTGGTTTATT  
TCCAAGGACACCGATTYAGACTATTAAGTGTATGATGASAATGTGCT  
CAAGATACAAGCTCGACAGCTCATTGGKTCAAAAAACCAGGACSCAAGC  
TATGTTGGGTGCTAATTAATAATGGATTCTCAAARGATCCTGYAGCGTATTTT  
GAAGCCATYGCCAGTAATGATTTTGCAATCAACCTAAATACCTCCTTGTGAA  
YACA KGCATTATTAGCTAGGTCCAGTRACAATATAATGGACTCATGCTGAAT  
ACCTCAATGTTGGATATATGTAYTCATTCATGCTAATGTTAGCAAGTAGTGCT  
AACCCCTTCTAAATTTGATGCAGCTGTTGATGKTTATTTTTGTGTATAGCAC  
ACATTACAGGCTCATAGGCGCTTTGCAWATATATCAAGCRGCTTAGTTTAAAT  
TCTTGATGCAACAGCTKTGTGCTRAAATATGATGTATACATGATRTTTCCTT  
KTGCCACCAATATAGGCAATCTTTATGTAAYTATAGCTCCCAGTAAGCGTATT  
CATGACTTCACAGAGCTACAGKTCTTTGATCTATGKCAAACCTGCCTTGAnG  
GGGGTATGTCATGATTTACAAAKGYTACRAACGAGYTAAGRCAGSTRTGCC  
ACAGACTTCCTAACCACAGATTAGCAGCCGTTGGTCTTCAACGACTTAATG  
CCTTGAAATTACACGTGGTTTTGACACCATCATAGTAATAAGCTATGGATGT  
TCTTTGGGCAAAAAACACGCATTCACACACAATGCAAGCGTGGCTTTCAA  
AAGACAAAATCAGACACTAACTGTAAACTCACAGGCACTTGCCGTTAGGG  
TCAGCTAAAGGTGAACAGTTTCTCCTTCAACCACAAGTAACAGCTTCTG  
TTTTAGATGGGCTCGTAGCAGAAAGCAGCCATGACAGGAAGCAGGGTACC  
AGAATACATGTGTGGTTAAAGTGTCCAAAGCAATAGTCACATTTAAACCCC

TTCAGAAAATGCATTTCGATATAATGGCATTGAAATAGGCCAGGAAAAAAC  
ACAGCACCTTGCCTGTTTCGTCAAGCGGAAGGCCATGCATTTCAATGGAAAT  
AATCAAGAAGCAAGGACATCACCTTTCACTTGGGTTTTACATAGGTAAT  
AATGTGTGCAATGCAAACCTAAGCACAAGAGCAGGTTTCAGACTGTAGACG  
TTCTGTCCARGGCGAGGAAGTGACGCACATAGTACATGTAGGCTAAGTCAC  
GGGTGTTAATAAAAAAGCACAACAGACTAAGGCTAAGAAAATTCCGCGCC  
AAGCAGACCACGATCGTGGGGGGTTGGGAAGAGCAGTCGATAGCAGGTCG  
GAACAGCAAGCCCAGGAAACCGTGAGTTTCAAGTGTGTTGGTTGAACCTC  
TCTTGCATATGGTAGACTGACGGCGTGTTTTATTATGTCACTCCACTCCTGAT  
CATAACATAGYATAGCTTAGACAAACATAACATGAACTCCATGATTGCTCAA  
GCTGGTGTTCAGAATGATGAATTGTACTTTATCTTTGTTAAATGCAAATCAT  
GCTTATAGCTTATGCAACAATGCTTTTTCTCTATCTGACAGTATGCTATGTTT  
TACTGCGTTAATTATAGCTGGTGTAAATGATGATCAAATCTGGTAGAGAAC  
GAAGTGATATTAATATATTGACTTGCTACCTTTCAGTGTGAGCTTCAATTTT  
TTGAGTAATGCTTCAAATGAGGTCTCTCTGAGTCAAACGAACTACACAA  
TATTTCTGGCTGAATTTTGTCAATTATGACAAGAGGTGCAAACACTCAGAG  
GAACTGTCAAAGCGCTAGGCCGGAACCCATGAGGCGCCTCTCATCATAACT  
TAAAGACTTTGATTCTGTGCCACACCACACAGCCCTACCTAGGGTTCGAGG  
GGGGCGGGCAGGGAATCACGCCCTAAGGGGCAATCAAGTCAG

>ERV-Spuma.b-Ame Consensus Sequence

TGTCAAGTAATCTGAARCAATGTCTGAAGCAATTCAGCACTTTTAAACAG  
CGTTCGCAATATTGCATTATGTGCAATTCTGAAGCAATATTATCAGTATTAAG  
TTTGTTATGCTTTATCATGCTTTGAAACATGTATGCGACAGTAATATGAGAAA  
TATGAGAAAAGTGCTGTCAAGAAAGCGTATATGTATGTTTCAGCTTCGCACA  
GCTTGGCTTTTGTCTATTAAGCAGTTCCAAATATGGAAATCCGATTCCGGACA  
CAAATGTCCGATTCATGATAACTAATATGGGCAGGTATTCGGCGTTTAGA  
CTGGCTACTTTAAAATGGCGTCTTAAGCATCCGGATAGCCATATATGGTTAG  
AACCATATATGGACAACCGACATTTCTATACTTGGCTATACAAAGGTTACT  
GGTGGGCACTGCCGTACAAAGGTAACCTCTAGTGCGTCTTGATATTAACACG  
AGGAATGAGAAGGGGTTATTCGAGAGCATTTTCAGGTGAAGCTGGTTGGATA  
GCGGCCAGGACAAGAGGACTTGGCAARAATGGATGGCTTCCAGCCAGG  
ACACAAAGTGTGGCTTGAACCCAGCCAGGACAAATTGGCTGCCGCCCA  
GCAAATGAGTCATCTAGCGATCTCTGCGGAGACTATAAATAAACCGCAAGC  
GCGGAGACATTRGGAGACGCAGGGCTGGAGGTGACAGGCAGCGAGCAGG  
TGCTTCCCCGACGCGCAATGAACCGGACAGAGTTCAAGCCAAAGCATAG  
CGCATAGCGCTTAGATGTGAGTAGTTATGTTGGAGATATTTTACCTTATGCAA  
CGATGCTATGCACTGTGATTGATGGAAAAGAAATAAGATAATACCAAACGA  
GGCTTGTGGATTATGTGCTAGCATATCATTTAGAAAAGAAATAATGCAACA  
AGAGATATGCTGGTTCTATACGCAACTATAATCCTAATATTAACATTTTTGC  
TTATTTCTGTAACATCGCTATTTTGTGATACTTAGCTTTATATATAGGAAAAT  
AAATACTTTATAAACTCAAACCTCTGAGTGRATCTATGCGTGAGAGATGTA  
ATCATAATGTATTTTGAACCTAAGTGCTCACATTTAATAAATTCATGTCTAGC

TAAGTTATGCGGGCTCTGGGATGAACAGCGGGCGCAGTTCCAAACAGAGA  
TTTCCAATGAGCAGGCTATCCTAAAACGTGTGATATAGTTCTCAGCTCTCCCC  
AGGGGTAACCAGGGGAGGGTGGGGCTCTATAAACACGACCCTAGGAGTGT  
GAAAACGTGACAAGTGGCGCCCAACGTGGGGCCTTAGGTCAAAGGTTAAA  
GGTCAAGTTAACCTTAGAGCTCAAGGGATAATCATAAATAATATACCTCC  
CTTTGGAGACTGAAGAGGCTGCAAAAGGGTTGTTAAGCTTAACAGTAAA  
AGGAAACCTTCTAAGAACCATTAGAAGGGTTTAACTGCTGCAGCTATGGCT  
GCCTATGTAGATGTGGACATACCTGCTGTTTGCCGAGCAGCTGTGAATCGCT  
GGCTTGATGATGGAGGAGTAAGGGCAATTAATCAAATTTTACGGTAGTAG  
TAGGACAACCAGGAGGATTGCCAGGGGAAACCCTTTTTACTTACATGAAAA  
CACCCGGTGCTAGAGCAGCAGGAGTTTTTGATAAATTAAGAATACACAAAA  
ACTTGAACACAATAGAGTATAGACCTTATGTATTTTCAGAGTTAGCTCTGCA  
ACACATAGACCATCTGAATTGGTTTGGAGGCAGATTGCAGTATCCTGACAC  
CTTAGCCAGACATGGTCCGTTTCATACATGCAGGATTGTCAATCCAACAAC  
GGCTAAATTTACCCAAACAGAGAGGGACCATATGACAGGGAGCAGTACA  
GACTGTTGGCTACACATTTTGAAAATGCAAGAAATCGTGCTTTAGAGTATG  
CCATGCAAATACCAATGGGTGCACAACCACCAGGGGTTCCGCCACCAGATG  
GGGGAGGAATACAATTTAGACACTGAAACCCTTGCTAGGACAGATGCCTA  
GGGAAGTGGGGGATTTACCCAAATGGTATTCAGAAAAAATAGGGCAACTAC  
AAGCTGCATTTCCACAAGTCACAGCTCTGCAGAGGCAGAGAGCTCTAGCG  
ATGGTACTCCAGCAGGATGACTCCGCCGTTAGAAAGTTGTGAAAGCTGG  
ATGTCAGTGTACAGCTGGCTATACATACAACTGATAGGCACTCCGTCTATAA  
CAGCCCTGAATACTATACTGAAGGATATAATAAACTCACAAGGAGCAGCAG  
CAGCCATGAACCTAGGACTGGCAATATCAGGAGGAAATTACCCGATGGTAG  
AAGGAATAATAATGCCTTTACTTAGAGGAGAGTCTGCCAGGTTAGAGATTA  
ACAATAGGCTCAACCCGCTCACCTTCAGCAGAAACAGGAACAATTTGGG  
GACATAGTAACTGCTGTATACAGATCAATAGGCAGAGACCACCTGGGAAGG  
AAACCAGGGGAAAATGTAAGAAAGGAATCCAAAGATGCGCAGCCTGAAA  
AAGGCAATGCTCCAGAGGTAGATCTGATGGGGGGCGYAGAAGGAACTCA  
CTCCTCAAAGAAAGGGAAATATAGGTCTGACCTAAGCCCAGTAGAAGA  
GGAAAGGGGAGATAATAGGAGAAGATCTTCGGATGGTGTATGGTAATCGATC  
CCATCAGGAGACACCCAGGAATCAAGCACCTTGGGGAAAAAATAAGTATT  
ACAATAATCGCCAGGATAGCTATGACTTTAGAGATAGGACAAAGCTAAAGC  
CACCTCAAAGGTATGGGGTTAGTGATGCTAGTTCATCTCATCCACAGACAG  
AGAAATCGCAAGCCCTGCAACCCAAGAAAGACCAGAGAGCTGACAAGAA  
AGAAAAGAAGCAGGTTGCAGCACTAAAAGTCAGTGATGGAAAAACCACA  
GACACACAGGATAATACCAGAAACAAAGAGGGTAACTGACTGGATTGAAG  
TCCTATTGGACTCCGGCTCAGAGATTTCCATCATAAAGACTATCCATAGAGA  
TGTATTGACTTATATTGAAATAAATAAGCGAATTGAAATAACTACACCAACA  
GGACAAGTACTAGAGGACAATGATGTCTATTTAGTGACAATCCAATTGGAA  
GGTGAACAACCTAAAGAAATTGAAGCATTGTTTTGGGACCATCTACATATA  
AGACAAGGGGGTCTTTTTGGCACCAAAGGATTGGCCACCACCCTATGTTAGG  
GAGGCTCCTAGAGGTGAAGAAGTCGTGGAACCAGCCTTCTCAGAAGAAGT  
AGATAGGGATGTAGCAAAACAATATGCAGCCGCATGGGCAGTGTTGGGGGC

AGTACA ACTGTATAAGA ACCATGTAGGGTATGACATTGAGTGTCCACCACAT  
ACAATTCCCATACATT CAGAGCCCAAGCCTCAGAGACAATACCCA ACTCCA  
CTGCCTGCTGTACCACATATTCAGAAA ACTTATAACTCAGCTTGTGGACCAG  
GGAGTTATAATTGAACAGACAAGTCCTTATAACTCCAGTGCTTCCAGTG  
ATTAAACCAGATCACACATACCGTCTGGTGT TAGACTATAGAGAATTGAATG  
CACATGCACGCACTGATGCAGTACAGAACCTTCACAGTTCTGGACTCTTGA  
ACAATATTCTCAGAAACAAGTATAAAACTGTGCTTGATTTAGGAAATGGGT  
CTTTGCACAACCATTGGCACCTGAGAGCTACAAGTATACGGCGTTCACGCA  
CCGTGGAAAGCACTTTCAGATGACACGGTTAATGCAAGGATACAAAAATAG  
TCCGGGAATATTCTCCAGTAGAATACAAACTCTTTTAGCAGATATAGGAAAC  
TGCTGGCAATATGTTGATGACATATACTGTACAGATGATGATCTAGAAGAGC  
ACCTTGAGAGAGTAGACCAGATAGTGCGTACTCTAGCTTCCAAGGGATACA  
TATTTAATTTTAAGAAATCTTTAATAGCACATAGAGAAGTTACATTTT TAGGG  
TTTACACTTACTGATCAAGGAAGAGGGCTTTCACCCAATTTCTTAGAGAAA  
TGTGCAAATCTGCAGAGTCCTCGTAGTTTGAAGCAACTACAGGCTATGCTA  
GGATTATTAATTATGGGAGAACATATGTACCAA ACTATGCAGAATTGATCA  
AACCACTATATGCACTGTTGAAACCCAATTTCCGTCCATCAGACTGGAAATC  
AGAACATGCAAATATTTTGAATCATGTATATACATTAATGACTCAGACAGGT  
CCATTGCAGGACAGAAACCCAGAAAAGGATTTGGAGGTTTCGCTAATGCC  
AGGTAAAAATGCTTTTGCATACACTATGTGTAACAGAGGGGATAATAGGCC  
AATAGCCTACAGGTCACACATATACTATAACCAGAGCAGAAATTTGCACTG  
GAGGAGCGGATTCTGGCAGCAGTTCAGATAACTCCAGAAGGAACGTTCT  
ATAGCAGCCGGAAAGACCATAATATAATAACACCAATCGCACAACTAGAA  
GCTACAAATCGTGCTAGTATACCTAATTCAAAAGCACAAACATACCAGGTGG  
GTACAATGGATGTCCACTAGGGCAGCACCAGATGTACAGTTCCATTACAAG  
GAAGAATTATTACCAATGTGTAATCTTGAATGGACACTACAAAATGAAGAA  
GATGTTAAAGAACCAGACATTCCATTATGGATGTATGCTCATGTTTATACAC  
CGATGGATCGGCGATACCGGCTATAGGAACTAGGTCAAATACTCAGCAGC  
TTGTT CAGTAGTGAAAGGAAGATTCAATCATCACAATGAATTTGAACCCTT  
AGACACACAAACTAAACATCTAGGGGCACTTCAGCACAAGTAGCAGAAT  
TGCAAGGTTTACTATTGGCACTCCGACAAGTTGTACCGAACCAACCAACAT  
TAATAGTATCTGATTCAGACTATGTGGTCAGAGCATTCAATACTGACCTACA  
ATGGTGGGTAAAAAATGATTTTAAAGATTCAAAAGGAAAGCCCATCTCAGC  
GAAGCAACTGTGGCAACAGGTGTGGAAAGTAAAAGAGGGAAACTCTCTTT  
TATGGGTAACACATACTAAAGCACATAAAACTGACCATGTGCACAGTACCG  
GCAATGCGCTGGCTGACTTATCCGCAAGGGAAAGGTCAACAAAATTAGTG  
GTAGCGGCACTAACCCGCTCAGCTACACGCATAGATGAGGATATACAGGCA  
TGCC TAAAGGGTGGTCCATACCCTAAAGGCTATCCAAACACTTATGGTTATA  
GTGAAGAAGATAATGTAGTGCGAGTAACAATTCCAATGAAGAAAGGCGATC  
CCATCAAGAGGGTTCTACCGAACCAATCTGAAAGAGAGAAAATGATAACA  
GCAGCACATGCAGGGCTGTCATCTACGCATTTTGGTATAAATGCAACCACTC  
AGTTGCTACAAGCTAGATACTGGTGGCCGGAATTGAGAAAGCAAGTAAAA  
CACTACATTGCTAATTGTACCACTTGTCTACAGACAACGGTGGATCATACTA  
AGAAGCCTAAAGAAACCCATTACCAAGGGCACAGGTACCTTTT GAGTGC

ATGTTTATGGACCACATTGGTCCATTACCACCAGTGAATAAATTCAAATATCT  
ACTCATCATAGTTGATTCATGTACCAGGTACACCTGGATATAACCCTCAACGG  
AATGCTGATTGCAGGACAGTCATAAAGGACTTGCGATCCTTATTTGCTATGA  
CATCAGTACAAACCCTCTATGCTGACAATGGCCCAGCCTTTACTGGCAAAG  
CCGTTTCAGGAGGCTGTGACAAGTATGGGGGCAAACTGTCTTTCTCAACCC  
CTTTTCACCCGGAAGGGAATGGAGTTGTGGAAAGGGCTAACGGGATTATTA  
ACAAGCCCTGACTAAATGCATTTTGGCTGGAGGAGGTAACCTGGCTAGAAC  
ATGTACCCTTGGTAATGAGAAGCATAAACAACCTGCCTCGTCAATCACAGT  
GCAATGGTAAATCTCCTCATGAACTCTTGTTTGGCGTCCCAATGTATATGCC  
TGACTIONACATAATCCCTCCAGTCCCTCAACCAGGCCAGATCAGCTGCTGCTA  
ACAACGCTGTTGAGAGATTCTCTCCAGGAGACGACTTCAGAGCCACCTGA  
AGAACCGACCCTGAAGAAAGGAGACTGGGTGTTGGAGAAAATCCATGAC  
AGAACGCCATTGGGTCCATACTACCGTCCGGCAGTTCAAGTGATCAGTGTC  
AAAGGAACAAGAACAGTGGTAATTCCAGCTCTTCCGCCGAAGAAAGGTAC  
ACGCCAAGTGTCCATCGATCATCTTAAACCAGCACCTGATGGTTACTGCAAT  
GTTTCCAAGGGAACCTACAGACTCTGAATGAAGGTCATGAGGAATTTGCATT  
GGTACCTCGAGTAAGAAGTACTGACGTGCCAAGTGTACACGAGGACTAA  
ATATTCGACCAAGGTTAGTGACCTTTTTGCAAGAAAAAAGCAGTAAATTTG  
TCCAGCAAATTCAGAGACTGTATTGGACTAGAAGATGGAAGATGATCTACA  
TACTACTGGCAGCATTCTACTTTTTGCTGTGGCTAAGTCTCATAGTCTTTTAT  
GCCACACTTACCCTGGACACTTTTTAACATCTGTCAATCCACACCCAGAA  
AGCAGCCTGGTTAATTTAACACCATTAGCGTCCTCACATGTATTGCATAAAA  
GGGAATAAAGGATAAGGATAAAACCGTAACAATAAGCATATATCCACTCC  
CTTTAGGCCAGTTCTGGATCCCTCARTACAGAACATTTGATGGGCCGTCATT  
GCAAATACAAGTACATACTCTATCTGTAATAGATGAGTCACGCCTTTTTACA  
CCTAACATTCCAGTTTCTCAAATGTACAGGGATATGCTTAGGGCTAAGCTTG  
TAACATTCACACAAGGGGCACTGYTAGATCCCGAGGATGATATTGAGGATT  
TACATAGCCTAGCAGAACAYATTTGCTATGTGAGGTACTATGACACCTTTCT  
ATTTTATAAACATGAACCTATAAGATGGATAAAYCACACACACTGGGAACAT  
TGTGCAGTACCCTTTGTAACCTCAAGTAATGAGTTTAAAGCTCAATCCCAT  
ATATAACTCCAGGAGTCTATAAAGTGGGAGATTATAGATATGAGAATCAATAT  
GAGTTTCCTCCAGAGCCAAAGGGCAAAACATTCTATTGGTCAACCCAGTCA  
GTAGTGTATGACAGGGGGTTCTATAGGAACATGACAGAAGAATCCTGGAAA  
GAAGCKGTACCGTTAAACTCCACATGGGGGGGTGAACACTGGCAGATTMG  
GGGAGATGAATCCCTAGATCTAGCATGTAGGTTTCCCCATCTCATGTACTTT  
TTAAATTACACTCACTATCAAACAACCTGCAGTAAGCATAATACCTCTTTCT  
ACCCTGATTGGGAGATGGTAGATGGGGATTTCTGGAATGCTAGCTATAGGG  
AYAAKATGAARCTGAATGGTTCTAAACCAATCACATATGCTTCAGGGATCCC  
AGTACTCTGGGCAGTACAGGCTAATGAGTGTAACAGGAGACGGTTTGGTG  
CTAGCGTAGGTCCATACAGGGCTTGGGCAACGCACAATAACTCACAGACAT  
ATGCAATTTCCATAGGAAAATTGTGCCAGGCTATGTCTCACACTACACATCT  
GAGTGAGGTATTATCAACGATAGAAGCCTGGGGAAAATCAGAAAATTGGAC  
AGAAATCATGAAACTAGTCTCCCAATGGGAGGATAATAGTTCTAAGCGAAC  
AAAAAGAGAAGTCAGCTGTAARAGTGATGCTGAGACGTGTAGCAGAGATA

GTAACACATACTTGGAAAGGAAGTCATCCTAGCTATCCAGAAAACAGAGC  
AAGAAGCGGTAAAGGAAGGCTTTAAAGCAGCGGATGAAAACCTTCTACCAG  
CTACAACAGGGATTGTACATTCTGAGAGATGTAGTTACTTCTGTGATAGGAA  
CTCTGCAGCATGATCTATCTGCAATCAGAAATGATCAACAGGCAGCTTCCA  
GCTTGACTTTAGTATCAAACCTTTCTGGATACTGACCAGAGGTGTGCCAG  
ACTGGACTCTAATCACATGGCCAAACCAAATGAATGAGCTGAATTTAACTA  
AGAGAGCAAAGCGGCAAGCTATGAAAAGGACTTCCTACACGCTGTAAAGC  
ACTCTCAGCAAAAAGTTTTATTCTTCATCAGCATGGTCAGACGATGTACAAT  
CATGGACGATTCATGGCATTGTTGGACATTCCAGTAGCAAGCGTTTCCACTAT  
GTACTGTCATGCCTTAATGAACTGGGGTACTATGCATCGAGTGGAAGGACA  
ATGGATACGCTCCAGCTACGTGGTGCCCTACACTCACGCTTGTGTACACAT  
GAAGATCCRACAGTGAGACTTTATGCTTTAGTGAAGTGTGTWGGGGCAGC  
ACGATTACAATGTCARGAAGTTACRAGGAAAAATCCWTGTAGTCAGWCAG  
TCCAAGATGAATGCGTGCTGCATGCAGATAAAATGGGAACATTTTCGAGCA  
AAGCGCATCTACTGCCAAATGGATCMTATGTTCGTCCARTTCAACACGTCAT  
GTTGTAATATTCCAAAAGGAGTAAACAACGCTGATAACCGTCACGTCAACAG  
TCAAATGCTGTGGATATATGTTGACGCCGCCAGTACAGGTCAGGCCGACCC  
AACTTAAATGGCCAAAACCTCGTACTTCAACAGATGGATTTTCCTGTGCTGA  
CGCTCAGGTTGGCTGAACTCAGTAAAATGAAAATAATCATTAAAAGCACTG  
CTCAGACATTCGAAGAAGCAGCATCAAATGCCATACATCTAACAGAGAACC  
TTTTGGCTGCTACGTTCATCTTGGGGCGAGGCCCTGAGTGCATTGCTTAAAA  
GCTCATCGTTTCAAGGATTCACTTCAATTTAAGCAACATCACAGACTGGG  
CATCAAGTGCAATCAGTACAGCAGGAAAAGGTGTCCCTCGGTCTGATCTCGA  
CTCTGGCTTCCGGCCTTTCACCTTTGTTCTACATTGCTCTGATAGGAGGGTT  
GTTTTTAATTCTCTTTCTGTTGCTAAGACACTGACAAAAGCGATGGCTGCTT  
TTCCTGGAAATGCTTTGACAAGTGAACAAATGCGCATGCGCAARAWAACTT  
GTGAAATACTTGGCTATGAAACTATCAGAGAGTATAATGACTTTTCATGTT  
CTCTCTAGAACGCATCCGGGAGAGACATAAGGTGGTTGCAGACTGTCGCTT  
CTGCTACGAAAGAATTCTGCTAATACCAGAAGTGCGCAGACAACTGACATT  
TACTCCAAGCTTAGACGCAGACATAGAACTTGGCTCTCTCAACATCGTGA  
TCAGTGTGCCACACAAGTTCTATATCCTGAAATCTTCTGTTTCAGCCTCAATT  
GCTGAAGGCAACCCGCTATTGCCTGCACAGGAAGCTCAAGATGGGTCAGA  
GTTGCAGCAAGCAGGAGAAGCGTCAACAGAGCAGGCGTCCTCTGAGCTC  
ACCGAGACCCAACCGGCGGTGCTCACCGAGTTTCAACCAGCGCTGCTCGC  
CGAGTCTCAACAGACGGTGCTCACCGAACTTCAACCAGCGGCGCCAGGAG  
GATACCTATGTAACCATGGAACCTCTGCTTCATCCATTGAGACCCATGGGCC  
AGACTCCATGTTCAACATTGATGGTGCGCCATGGAATGACATCACATCAGA  
AGAGATCGCAACTTGGCTTCTCGAGATTGCCTCTTCGTCTTAAAACTGTC  
CATGGGCCAGGAATGGTTACTATGCTCCAGGAGTCAACAGAGGCCTATGGA  
GTCCACCAATTGTGAGAAATCCGCAAACATTGGTCATCATACTACATTGCAG  
ATTGTTTAAAGAACTTTCCGTACGCCACTCCAGAACCGATTGCGGTGGGTAA  
CGAGAGAAAATATTGCTTTCCGACTCTGCAGCCACGTCCAGGACCGTCATT  
TACTTCATATGATTATGGAAGCTGGCTGAACTTAGAGCACATGCATATTGAA  
GTCACTGTAGGTGATTTAGGTACTCGTATACTGACATATGATATATCCGCTTC

TGCAAGATCTCATCTTTGGGTGGTGTACTTCTGTACYAAAAGATTGATTATA  
GAATCAGGCCCGATGGTATGGGAAGGTGACTCAAGAATCCCTTTGTATTGG  
AATATAATTATGTCTGGTCAGAGTGGTTTTYAACGATGCACCAGATTTCCGTG  
CRCTTTACAAATTATGCCTTTGGCTAATGCTAACTCAGATTCTTGAAGCATT  
TAATTTAATACTGTATGTTTTTTGACTGTGTGTTAGCCTCGCCTTGTGTCTCA  
TCTGAACATTGGGGGGGTGTCAAGTAATAGCAAGTCTGAAGCATTTCAGCA  
CTTTTAAAACAGTGTTAGCAATATTAAGCACATGTCTTAATGCAATATTGCA  
GTTTACGATATATTATCAGTATTAAGTTTGTATGCTTTATCATGCCTTGAAAA  
CATGTATGCGACAGAAATATGAGAAATATGAGAAAAGTGCTGTCATTAGAA  
AGCGTTATGTATGTTTCAGCTTCGCACAGCTTGGCTTTTGCTATTAAGCGGTT  
CCAAATATGGAATTCGATTCCGGACACAAAATGTCGGATTAATGTACTAAT  
ATGGGCAGAGGTTCCGGCGTTTACTGGCTACCTTAAAATGGCGTCTTAA  
GCATCCGGATAGACATATATGGTAGAACCATATATGGACAACCGACATTTCC  
TATACTTGGCTGTACAAAGGTTACTGTGGATGGGCATGCCGTACAAAGGTA  
ACTCTAGTGCGTTGGTATTAACACGAGGAATGAGAAGGGTTATTCGAGAGC  
ATTCGTGAGCTGGTTGGATAGCGGCCAGACAAGAGGTTTGGCAGAAATG  
GATGGCTTCCGCCAGGACACAATGTTGGCTTGAACCCAGCCAGGCACAAA  
TTGGCTGCCGCCCCAGCAAATGAGTCATCTAGCGATCTCTGCGGAGACTAT  
AAATAAACCGCAAGCGCGGAGACATTGAGAGACGCAGAGCTGGAGGTGA  
CAGGCAGCGAGCAGGTGCTTCCCCGCAGCGCAATGAACCGGGACAGAGTT  
CAAGCCAAAGCATAGCGCATAGCGCTTAGATGTGAGTAGTTATGTTGGAGA  
TATTTTACCTTATGCAATGATGCTATGCACTGTGATTGATGAAAAGGAAATG  
AATAATACAAACGAGGCTTGTGGATTATGTGCTAGCATATCATTAGAAGA  
GAAATAATGCAACAAAAGATATGCTGGTTCTATACCAACTATAATCCTAATAT  
TAACCACTTTTGCTTATTTCTGTAACATCGCTATTTTGATGATACTTAGCTTTA  
TATATAGGAAAATAAATACTTTATAAACTCAAACCTCTGAGTGAATCTATG  
CGTGAGAGATGTAATCATAATGTATTTGAACCTAAGTGCTCACATTTAATA  
AATTCATGTCTAGCTAACTTATGCGGGCTCTGGGATGAACAGCGGGCGCAG  
TTCCAAACAGAGATTTCCAATGAGCAGGCTATCCTAAACTGTGATATAGTT  
CTCAGCTCTCCCAGGGGTAACCAGGGGAGGGTGGGGCTCTATAAACACG  
ACCCTAGGAGTGTGAAAACGTGA

>ERV-Spuma-Rbi Consensus Sequence

TGTCAGAAAATATcTTAATATTTTGTGCTTTATTGATaATTACTTATATTTAGTG  
AAGTCAGTAATCAATTAGCCATAAAgAaACaTGTTAGCAtTTAATACCCATAA  
GCCTTTAcTTTTAAAAGCCATGaCaTcgGTCAtGGccTGTGCTGAAAAAgCTcCA  
GCACAtAGCttcaccttcccctacttaaaacctcaagattcacCTtTgtCCcacTTTCAGACtTTGA  
GAgtagagTTGTTTACCACtTatctCTTATCTCAAGtAAGAAAgCAcCTGCATTTTAT  
GACaTTGaGCATCCTaaacgcaggtgtcatgattgaccaccetaAAAACAgaTGGccagccAaTtA  
agcgtgaatcttGtGAcAGAAgGGAGTGaAAAAGaTTTTCTCTtAGAActACAAAagA  
AgatttATCcAATTAaaaATcaAAaATGGGCgAAGCTaTAAACAgaataagaataaatctat  
atthactgttctgatatgaaaaattgattgaaccttagtcaaggtctctagaaatgaagttcttcaaaggcTAAaAtaTAg  
ATGTgTTGATgGAAGtGtAACAGcgACcCTGGATCAAAggaatcaaaggGTcTTAAGt



GTATAAACagtgGCAGTtGAgGGagAgggagagGTGCTACTTaGAcTTTCTTcGC  
ACGTGATTgAGAGAGACACAgAGCgGGgTGCTTCAGAttaaTTGGTAAATATAA  
tttTTTATTCAAGTATATGAGAACCTTTAAATTGCTATTGTTTCTAcATTGGCAG  
ATGTATTAGAAATGtATTaATTcTaAAAAgATGAcATTaATaGACATTTATCTGAT  
aTTAATAATTTCAATtactttTTtTTAATGGcTcTtgCATTGATTGTAGGATATACTCT  
GGTAAAgTTAAGATTTGAACATAAAAAGTGtTTcTTAGTCATTTAGAGATaTTTA  
TTCATgCCTTTCTtTATCTGtgaaatAAAgAAAATATTTTTTACAAtAAACTGACTG  
GTTTATTaTGCATGatGTGCTGCAagAATTAatGgTtAATaaaAAAtTTCTGTGGTA  
GATtCGAACACACCTCTGAAAgTAAACTTTTTGTCTCaAGGCAGaAAGGGTag  
GGaaAtAGaAgTGGAAGTGGGagTaTTTTATCcAgGCAGGATTCCCTGGTTTTaA  
ATTCTGCTAAgGGTAaAAGCCTCAATACTTCCATTCAAAAAtTTaccACAtggcgccc  
aacgtggttaaatcctctgtagaattaatattttccagctctatgtaattttgcctttgcagcagttttataattggttgcaatg  
gctgacctatagaattagagctctcaagaagcaacgttccgtaagtgggtgaagccaatcatatcaggaagatcagt  
cctttgctctcattacaagtgccagtgactcgtaccgtcttcatgttgacattgtcgttaaaagctctactgcacag  
ggcagacaccaggggctaaatagaagagcagaagaggattttgtcctttgctctcctgattgctagatgtcttttacttg  
gtaaatgcttattttagagaatccggttaattccggttctgaaaaagaggggctggcgttactgaaccgcgtccgct  
cttgatgctattttgctcttgatgccccgctgtggatcaaattccggcagggaaaaaatgcgtttacaatgcctattgc  
actgcttcaaacgctcagagatcattacggacaacctcgtttctttggggacgctggagaattcggggcccgtagtga  
gattgatgaaaagcagatagagtaagcgggctttggggacgctccagctgatgtaactgatacctgaacatctggcc  
actagactagtcgctgaagctgactggtgctgtaattctctgaccagacattatatttctactctgatgccacagaa  
tttggtctccccctcattctgcgatagctggggcagttattacgggtggacttatcgttgatattgggaaaccgtaata  
caaatcgggtgaagtgtcgtcatattttgcaaaagtttgatttcagctgcatattcttggcatgctggttactatgagta  
atfttgatcaagatgggagattttaaagacgctatgctgatacctctattcgtattgatcttagtaatcgttgaagtgcattggc  
cccggcagatgacatgagcagttccattcattaccagcaagcttcgagggcggctggctgctcattaatccccttaagc  
cactaaacaggctcagccagggctgacagaccagggaaaggggcagagagatccagcgcactcagcctgagaaaa  
ctcaagacgggtgagtttcaattcaggaatccttctcccaggatagaaatcagagggacaatagggggtttgggaattcta  
gacaggattataccccccccctccagaaatcctctaaactgggtgggtcccgcctatcctgtgagggataatcgtg  
ggaccctcctgcccgttccagctcctgagaaacctccagcgggtgctccggagctgtaactaaggcagaccgcccctccc  
ccttctctcaaaaaagcctgtgaagcagccatttccatggcaatgctggtccacgtctaaacccccgtggatccaga  
ataaggagcagggtgatctatttgggcatgatggactcaggtactacaattaatcctgactagagaatgggatacaatt  
caatatttaaatgaaaatgtcacaattactatgttgcaggggaagcagctcaagctccccttagcagctgtagaaatctttccc  
cttactcaaaagggctccgtaccataaaagtgcatgttatttggatgaggaggatcctttgcaattatttcacacaggctgct  
gtgctgttttgcctctatgatgttgaggacccccctttaggctttgaggctgtaaaagctcaatttctcctcagctcaaatcc  
atcattggagaggtgagctgcagaatttgttactgaatggcttaagttaggggtcgtcagctctatcataccacactggtt  
tagtgacagaccctaagccgatagatagttttaaataagccttccagctcctcaaaaacagtatcctgtccataagaaattct  
acaatgatttaaatattattttctcagaaacttactcaggggttttaattgaggaatattctgaatttaattcaccctcctcctg  
tgccaaaccaaattgggagctactcgtatggtcattgactatagggtacttaacgcctctctgagacagttgcggctcagactt  
tgaatcctgcatctacaattgataattgccacgtcctaggtggaaagccacctggatttagctaattggttttggagattccg  
attagcactcccctgctcactgcatcattcaggggtaagcagatcagatataccaggctcccctcaggggttttaaaattccc  
ctgttttatttctgctgccgttgaggaactcctcagcgacataacattgataatgctgttccttatgttgatgatataatctggct  
ctgataagctggatgtcctttggattctgtttaaactaatacaggtactgggtgaggaaggtttgtagttaattttgcaa  
agccagaattggtttgaggaagtaagttctgggattttaaagcgggtggcaggtgctagccttgcacccctccaag  
aaaagattatctcccgggtgcctaagacatctgccaattgcaagtaaatcatggggacacttaattttgcacgtaaaactgt  
gcctagtttgcctcatttagcagccccctgtatgatttgcctaaaggagatgccgttggcagctgattggactgctgttcatt

ctgaatgtttgagagcgtgcaagaggctgtcaaaagtttcagcccccttggcgcaccgtaaatcatctaaagatttagatgtca  
cgttgacaggtttctgactctcatttctggctacaatcagtaacatgctgaatctcagcccatatgttatattacatactttctc  
tcagcctgagaggaaatftaattattgtggagcgtacactgacggctgtcagatattgctgtctaaagtctctgctcttgctcag  
ggtaagattattcattgttatactgggattccccagttacaggetgtcactgccattccctcccagagagtagggctctctcca  
cacgctgggtgcaatggcgtgctgatcaatagagacgatgtcaattcattatcagaatggttggctgattctgacatta  
tttaactgtgaggatctttgcttaactactgagacggataggctccttctcctattatcagaaggtcaattgtaattttact  
gatggttctgccacacctcgggtgactatctactgcatttttctgctggcagctaatgttatttaactcctaataaaaggggt  
cagtggaaagtctttgccacacatactggcgttaggtgatagagttcacagcaggcggagctgattgccttcaaaagg  
ctttgacacatactgagcaaacgcccaatttggatcctgaaagatccgttatggtttgtctgattctacatatggtgtctgggt  
ttaattcacatatgaaagtgtgggaaaacagtgacttttagatgttacaggcaagcctattgcacacagagctcactggagat  
taatttttctatttcacagaaactactgtgcaggtgcttctgctgcatgtgcctgctcaccagaccgtgggtggtactctcgtt  
acaattctttggcagatgaagcagctaaattggctgcctctcagcaagagataactgtaagggcacgtcttcttaggcatgg  
ctcctfacattgaaatgctgggtactttgtgccagcattcagatggggtttgactagaagtcaggcaaaagaaatggtcagtga  
ctgtttggattgtcagcgcacaaatcccaaacggactggacaccttatgttgaaggacactccacggggaattagacca  
gggcaggtgggtctatatggatcatgttgggtcccttacttctccgtggttacagacataatttgggtgacttgattcctttactg  
gctttgtttctatttcacagaaacgcattactgctattgtaactgtaaccgtctggctattgtatttgggtattttgcctttcagtt  
tctttgcacagacggcgggtccagcctttaaataatgctgaggtgagaccttttctgctgatcatagcgttactcatcattctct  
accacatcgtccagaatctaataatggaatggtgaaaggattaatggtgaggttaagcgtagtctgcaaattttgccttgaat  
ctaaccacagtaattggtacctcatctccggagatccaaatccggattaatagaccataactgccaatcatgaagctccc  
ctatgtctctctttgggtctctatgcttgaataatggcctcctcagaagctatggttacttctgacaaggcctctcggagtcca  
aatcctttcagattggtccgtagttttgagcaaacgcatgtctggtctttagaaccatactggtctaataccctttattgta  
cagaactctaggtgactcgggactgttcttctgactctgaggatccaaagaataggaaagtgtgtccattagagatgtca  
agttggtatccgagacattgggggtttccgggtaccagagcctcgggtcaacccccagcctctgctgcatccgcagttccgct  
gatgcaatgggtcaggaggatctaccgtgccagcgtccactgctccagcaattgatgtcattctcagcgggtgacat  
ggctgtgcctaccccgagcaggaagatcaggtcgtctcagtgtagcttgcctccatctgagcgtcctccatgtttaacc  
gctttcagcagaagcttttctgcatgctgtatggtttgttcccaatcagttaccttttgcagctgtgtttctttttacagacct  
attgtaagtattgattgcttctggtgcttttaattattgcatctcctatctcactattttatctcttataataaccagctgcatc  
cacctttctcccgcagcttcacagagctccgttattcactcacatgtcagtaagcgtcaccttctgagcctttgtctctc  
tggcagtgctttgcctctggtgttattctgttccataccatggctggctggtgcaagatcctgtttattgcatattgatgttct  
ttcaggtttacactcaccaggtttgcaagcctctcctccggagtcctgcctgcgggtctagagtccagactgttctgctctg  
ttctgagctggagcgttctcctcagctttcttccatcactcggaaatcctctttagtgcttccgtgacaggttctgttctg  
attagatatcagaactgttctcctgggttcagagcagtgagtgcaatcttactgggatccttgaactccatcctggaactgc  
agcactgctctcaaccacatattggtgcttctgaacagttccagcggctgtttgccctcgtccttgtttcataatggatcttgtg  
cctgcatcaatcccccttgaaggtgctctggaggactccttctgctggtcttaattatgaattttcaggtttgattaaaggtctc  
atftctcctggatggacatcttctgaggtaacactttcttacgctaattattccacatgggggggagaggatacaggattcc  
ccctccaatgattaaggactctctgtcttattgtttgtagactaccttatgaaattctgttttaaatagttacacattatcatgtctttg  
tgatgaattgcctgtctcttttacacattggcgtggaattcttttataattatcttgggaataatgcgtgtgggaataatccatt  
ctttgtaccgctcctcgtccaccagacaaatgcttttggcctagtggcaatatcagggttaattctttgtaataaaaggttt  
tctaatagggtatggggaccttcttactcagggactaatttttcaaaatgcacctgtgcttaggccggctttgaccgtg  
cctgtatcaggggttagctgaggggttaaatgacactgaggttacttctgtgttagatttaattgtacagacaaaatggctgaa  
tgactcattcccttcccgttgggtgatgagaacagccaacagaaagcgcaggaatgctttgaaacaggaggttcaaaaat  
acattccttaacttaatgatagaattaaactgctataaaaggattcaatccaatgaatatcagctaagagcaggtattttcaa  
ttaagggtacttagctcaaaccttacagttagggattgatgccatataccacaactgatgagaaaatacaggttctagcaaga  
atagaacagcttactcatttattgatggtcttactccccaaaacccaatgggggagaccttcaattgggaaaaatattagag

gaaataaacctcacagctgagcaaattcagtatgcccatgttgaggcttcacaagttatgttcaggtcagcaaacatgaaat  
gggaaaagaacctgggcaaccttaggtcaaccctagtagcaagggtcagacgtatcttcccaatcactactcaggtc  
tataaacgttgctgggaaatccagaactttggtcagttcttgaaagctcaaaggaaagcaaacctggattaaaacaattaa  
aatcttgaaccaaccactgtgtattaataatgctggtatcactggatcatagcacaagggtgcacaaaagttcctgtaactg  
tgttaattccctggtgcaggtcttaactgcctcactagagggagaagctgattgcctctagaaccgaatcccggtc  
ctctagtagaagtttttgaattaccaatggatcttatactcctcgggtcaacaaagcacagtggtgggttcaaccgggaat  
attgtatttagtactgcactatctgcattaagtgtggaccgtgggaatttatcctacacttagtcccgggttaactgaaacaat  
aaagtacatggaattaaaccagtacaattcactgagttaaaaatgttattgactcatgtttaaatgtaaagtattattaagaat  
ttgtctcactttggtaatgacagaggatgagttttacagcatctgagaatgatagaactaacagctagtgatgggagctga  
tcctagacgagctactgaagccagaggattttcaaatgccctgggtcgtgcttttctggattagtggtgggaatagctaaaa  
cagctgttggtgtagttaaaccataatggaaggggcaggtggactcctcatgacttagggatcaatttattcccattaatcct  
gggaatcatagtaataattggtgtctttctctgcttaagagaaatagaacgaagagcagcgaaccagaaatggcaggt  
gtaaactcaaagatacatattccagtaaatcctaggaagaatgcatgattgtctgcctgggacctgatctcataaatgagat  
gctgattatggaagctggatgattcagaaaacaatcctgatacatgtgcacttattatctgataaaaaactgtgatatttttt  
aagttcccacaatattcctattgctggacttgccaagaagactggcatctgttcgtgaagcactacgaagaacctgagtg  
tcacattgtcagtgctccctgggaactgtgccctgctactcaatattactctttggcagaatataaattaggataggac  
atggcctatcaaatgcaatcctgttctcagatggaatcaagagcctccagcccggggttaagctgaattggttcca  
gtacctagtcacagcttttgcacggatgaagaattgatccaatgcacttgcctccggtaattcttaacagatgaagg  
acaagactttgtctttgctgaatgcagctctctctctgaggatgatcaatcagtcattctccaacatcagcaaccaatcct  
actcaagattctgctccgactagaccagcagtggaagggcagcaaacagattccaatattataattagtcagactgacttca  
cagatattgaaacgtctgatccggctggatctactgagaactgtgaataactgtctattattgactggactggtatgtcttat  
tcaaatgcacttgcattcaggatcgttctcatcaattgtaagtataataggcatttaattgccacagatccctacacat  
gatggaatcagtgatgacacatcacagattctgacctagagatttttaattatgaacctcatcttattgactggatgag  
cagcttcaaatttaaaatttaccctgggtatgaatgttctatttccataaggaaatattgagaaacttttatatctggfta  
ttattagaactaactcagattgtcaactcatatctttatattcaattggtaatgtaaccaattttattacacttgattattacat  
ttgattttcacttgatctatgcaatgttgagcactgacacaactattatattgtagttattgtgtgattattttccccaggcttatta  
gtgccttactgatttatatgtatctagctatgtctagatttttactgactccatgggggggtgcagaaaaatcttaatttt  
gtgctttattgataacttattattagtgaaagcagtaataatagccataaagaacatgttagcatttaatacccataagcct  
ttactttaaaagccatgacattggtcatggctgtgctgaaaaagctccagcacatagctttcacctttcccacttaaaacctc  
aagattcaccttgcctcacttccagacttgagagtagctgtttaccactttctctatctcaagtaagaaagcacctgcattt  
tatgacattgagcactcaaacgcaggtgcatgattgaccacctaaaaacagatggccagccaattaagcgtgactctgtg  
acagaagggagtgaaaaagatttctcttagaactacaaaagaaatccaattaaaaatcaaaaatgggcgaagctataaaca  
gaataaaaatagatgtgtgatggaagtgaacagcgcacctggatcaaaaggggtcttaagtgtataaaacagtggcagttg  
agggagaggggagaggtgctacttagactttctcgcacgtgattgagagagacacagagcgggggtgctcagataaattgg  
taaataaatttttattcaagtatatgagaaccttaaatgctattgtttctacattggcagatgtattagaatgtattaattctaa  
aaagatgacattaaatagacattatctgatattaataattcaattaccttttaattggttctgcattgattgtaggataactctggt  
aaagttagattgaaacataaaagtattcttagcatttagagataattattcatgcctttctgtatctgtgaaataaagaaaatatt  
ttacaataaactgactggttattatgcatgatgtgctgcaagaattaaagggttaataaaaaattctgtggttagattcgaacac  
acctctgaaagtaaaccttttctcaaggcagaaaggttagggaaatagaagtggaagtggtgattttatccaggcagga  
ttcctggttttaattctgtaagggtagaagcctcaacttccattcaaaattaccaca

>ERV-Spuma-Smu Consensus Sequence

tggtacaggcctcagtagaagttaaggtaatgactattacaagtctaagtagaagttaaggtaaggtaactacgcagta  
ctagtagttctgtccataagatTTTTTatgtttaaagattagaatgtttgggtattctgtaaaaatgatcaacagcttggccttg  
gtgatttccctcctcgattttctctgagttttatgaccgttagtactcttttgaggtagcgatagcaggtctagttacaaaatc  
ttatatatgcagaccttggttatactctggggcagaccgagagactgaagctagacttcatacagactgactggatgtt  
tattttattttatgcatataagtttaacaggcattctatgttatactctgttttaatttggattcctgtaattttatttttcaataa  
ataattactatgatgaattctcagtcctttctataattgtgtcaccgatttctattgaatgtgagacctaccatgtataaaa  
ttgaaatttggtaacttacttaggggtggagaataaccttatttaagacattacatgggaggaaagggtgaacctcac  
aattggcgcccaacgtggggctcgagaattctaatttttatattaccagatataatttataccgcggctcttatacgtagg  
gaaggtactctcaatatcatggcgaataatttctgatatacagcgattaaattcattgtgcagattgcaacaaggcagagat  
gtgcaaaatgatgaagtttagcacttgaataacagatgttcctggggatcaggagctagatactgcttaaccgtgtattg  
ttgtaggaccaaattggagttgtttgcaaacacctatgtttgagttgaggatattgatttaacctgccaggcataccattgtt  
aatctgatctatgatgaaagtcagatcatttgggaagagtcaccagtaatcccaaatagcttccgagacatggaccatagtc  
cagagtggaggggtggggtacccccgttcaaaatfataccagtgaaaggggaggaattaccctccactggcggctact  
cttcaactagagagagaacagttattaagagaactgaatctagctactgccactttagagcagatattaatagaggagcttca  
aatgtttctcagtttcttaccagactacaggaggaattcctatgtctaactaaagcaactgtgggtcaggttccctcaatac  
taaggagattcccctatggcttaatgacagaatacatgcattagatgggggtatttctacacctacacctgcacagaaagaag  
ccttaattaatgctttgacctcctggttgtctgttactcaccgaagctaaagattggaattctatagtgtactttgtatga  
aaagactcatggaaaagttaccttggcttcttagcggacacattaacacaagttcacaagtccagtggcattgtgcagcata  
ttctttgggattgagattcactcaaaataatcatgagatagtttgggggtgtttaaagtccctataaggggacaaggacttatatt  
agatttagaaagacaaattgaaagactcctaaagaggaacgttgtgaaaaagtccagaYgtttaaaaatacttatattct  
tttaggtaaggatttaactgggtgaaggggcagccagtaatagacagaaggcagacgaaaaaagaaaaagtgttcagtttcg  
cgctagacagtctgactcacgcaggcatgcaaggtcacagctcaagcagtacacagggaaagtactgagaatcagcgtga  
gaagggaaagctccatctagaccagtactgaggaattaaggaggcaggaacccccaaaatcgatatgccttgcgcccttcc  
attcgtaccctgatagatagggcagcctcgccaagatgcgcgaccaagagagagatcccaattgcttctgctaacaga  
tttctgaaagggaggcagagtagaagaaagggttacagcatctgcagctacatctgcagctacaccgcccactaa  
aaaggtaaaataagataaagagaacctcagattcctgcaccagagctctgtagaaaaactaatgagcagtaaaatggaga  
gtttaaatacaaaactgtacaagacaattttatactggacttctgacacacaagcagacatttattagtaacaaccaat  
atttacaggaagaaatgttactatgtttctgtacaaactttagaaggagaagggtcatacccatctttatacaaaattaaag  
ataaatggaaaatgtttctttagaattggtgaacatcctaatttagatacacagtttcttattgctttaaagatgtagctcattt  
attcagataactcagagtacagaacacaaatcctgatttaacaattaaagtagatgttggattcttatagaacaacaatag  
ctcaatctattgtagagaataaagataaattggctttatgtctttgtatcattttcaggtattccagcaatgggaaaaatcaagca  
ggatataggagagagatttccatcatattgctacgggaactgttactccaaagcgtcagtcaccagataaagattaatcatgc  
cgcaatacctagattcaaatagtgatagatgatcttgttaacaagggatcattaagaacagtagtcaaatgaatactgct  
gtttatctgtaccaaaccaaatgtagttggagattggtgttagattacaggaagtaataaggtaactccgtagtttctg  
ctaaaacacacattctgtttcaattttacacggcttagtccggaaaagggttaaacaacattggatcttctaatggttttgg  
agtcacccattgatacagatagttattggattacagcttttacttggcaaggggaagcaatatgtgtgactcggctcccaaa  
gggtttgttaactcccagctttgttacagccgatgtatcattattatctgcattttctaattagaggtgtatgttgatgatt  
tacttatcccatgatagtgaaaggaacatattgcagttcttacacaagtcttagataacctgtataaagcaggatacatagtg  
ctctaaagaaatcacagatgcacgtacaaggttactttctgggggttgacattacacataatggcagaggattgtctgata  
attacaagaaaaaattgctgcaattaaagaccatgtagttaaacaattacgcagcattattggacttttaattatgcaatg  
ttgtttatccaaatttaatttaatagcaccattacatgctgtgtttcacgagaataagatcacaacaaactaaaacccc  
ttcagtggaatatgaaggaggaaaaagctttacaagattgttgacagctgtaataatgattatttaacacaagagagcct  
acacaaccgctatctgtttatgttagtatttctctgaggcagcatatatacgtatttacaattctgctgaaattgttccgattgact  
tttactctatgtatttacaattacagaagaaaatacttccggttagagaagttacttactcgggtgacggtagctgtgttgaagt

ctagagacttagctcaaggtcagaatattttatatttatacttctgttctcactcgcaactttaaaaaaagaacaatccctgaa  
aaaagggcttttaaatgctgatggtaaaagtggtaactttatcgaagacccccagcttaattttgtgtatgatgctacgttacc  
catgttgatgatctccaacattgtataatagtgtccagtggaagcacaagaagcatccaactgatttctatacttatctatatta  
cacagatggctcagcagtaactctaacaaggaaggagtaatagatctgccccggtaggcattgctaaatactcctcgat  
atgagttgttaaaaactggcagctcccgataggagatcctcgtcacacaatgctgagatatgcatggttttgcattaaa  
agaagctttaagtataagggctcctgttctgttactgattctgcttatttagcacgatctgctaataagatctcgtatatgg  
agatcaaatggtttctcacggctaaaaagaagccgtaatgcacattgctaaatggaaagcaatttctgcttatctcaattata  
agcctgatattgaaattgtacatgaaccggctcataggaagcttggctcgtcgtcacacactgggtaatacagcttgtgattc  
tctcgacaagctgttagtcaaaaatgctgtgaaccaagttaaaaccaggtcacaagcaaaaccagccagctcgtgatgca  
gagttgaatgctgtttggatgattccagacctaaccacctggatatccaagaatataatgcataaaagtgaagatgaacac  
tgtattgtcactattaaggaagtgattatatactccacctaagaagaagggtccgaattgccaataaagcacatgcaagt  
attggctatccacattgggacgtgacaatgttctcaagcacttaagaaaaatattgggtggcctaataatgagaaaaacgggtg  
tcatatgtggtaggtaattgtaaacatgtttgttagttaataatcctaaccataaaagccaccacataattgtaaagaaattct  
aacaacacctttgatctaatattcttgatcatattggctcactgccaccttctcatggttacctatatgtttagatgtgtgatgc  
ctgtactaggttacttgggtgtacccgtacgtgtacgaattctaaccacacgcttagttgtctcaatttttggtaggtgctgg  
aaaaccaaaagatcttactcggacggcggctccggctttcacggctgtgaaaaccaagagtgggctcatgccctaggtat  
taaatgggaattcagctcccctaccatcctcaagtagtggggtgtggaaggaataatgccgaaataaacgactccta  
accaagttgtgtattctcgtcccacacagtggtaccattgttacctcaggtacaactaggtattaacaatattcctgctcaaa  
ttcaggtaaaacacctttgaattgatgtatgggttccaatgaatactgattttgtgactcttctatttctgcaccaggagacta  
gaacaattatctttctacaggagttgcgagacgctttgtctcaccctgcgtacgcaccagataccacacatgcatggactcc  
acaggttggccattttgtccaggagagggtatctactataagcccttacgaccacgttggaaagcctccagcagagattaaa  
actgttattaatgaacggacttttattatagttgataaacaaggccgtcaagaactgtgagtattgacaatttaaacctgtcc  
ttatcctgtgatattcagatggaggagaaccaccttaactactcctcaatggctgaccatggcaaatgtgcagacgcag  
gaaaaccagcaggacattttgttgaatatcaatcgtgtgccacagaagatgtgcagacatcaggtgagaagagactttca  
ttgatatacctgattgcactaaaatgccttctttgaagcaaaaacatgtctgtgattttgcaataagaccccagtaagttgaga  
aaactgggttactttttctgcattttcatcctgttgttgaataactacaatcgggttgcatttttgcattcagttgattttat  
cacacaacgtcctggaatcacctgacatggaatcagacccaaattcatccaggtattgggaatgctaaacatgtacataaa  
agagctttgatgtctaataatgttctgtgaggtacaggttacaggactggaacaaggtctgtactggaagccatatccaac  
gcctattgtggagaagaagaagctcctgggtatatccaagtggtacttatagacttaataattcttgcaaaaacagctggaat  
gtttctgatgaaggacgtcctcgttaaagttatacctagatgaccagatgaaaaaggtacaagctgttaccctgccataaa  
gttgcctttacaggaccaccgaaacaacaacataatagagaaaagatgtgttatgtttctcttggacattgttattttgtgatt  
tcaaggcgtagaatctggccaacaccggaataaaggctgatcagtgccYcgtccaggtactacacaggacaaggtgta  
acataaaaggtatcctatttttatttgaatacaggacaaactactcaaaaaggattgtccccttcagaaggaatgacacac  
gtattgatttttgggaagatgcagaagaggaggaatatacattcctggaggtgtaagacctataaaggtgctgtttttgtct  
aatttgccttactcagaatggtggaaccggaaatttatgatgatgatggctatgatgccttgatgaagcaactacatgtgagg  
tacaanaatccgaaacgggtgaattaaagagacaggcattccccctgagtggcaggcaaaaaggacagaaaaagttattt  
cgcagctgacggaatgggatatctgtacaatgccaagattccctcgtttctgaatacatcgtatttttagtactctgcaaag  
caaaaggtaatccgtgcggtattacttacgaaagttgatagaacaaggaatattgatccaacattccctcacaggtttata  
gatgcactctgttcattttttacaatttactgataacatttcaagtggcagcctaacaacatcgaccaaggattttacatta  
cagcggactcctggtttttgtgctgcgagaaatcaaaattgttaaaacaaattatacgtttactcctgttcagaaatgtt  
gacagacagccatatatgatgtgaaactgtgataaaaggatatacaggataaaatgaatgtatatattggactgatgaca  
aacatgtgagtataacaggtgtaaaacaaaaaatatcgtgatatgccatgatgcaagcagtggtgggaacaaataacac  
attgcaaatatacattatcaaaacaacattacaaaaaagtgatgaatgtgaaaatgttttgaacgagacgacgggtgta  
aataatgcagaagttcaataacaactggctatttctaaagtgtgctgtttctattattagccacgtctccgatgctaataatga

agagftaaagaagaaagttttgtttaaagatcatttaataatTTTTatatctgctgcaatgtcagattttactgttttagcagaag  
aactaagagctttaatggtacttaataagftaacagctatgagattaacccttcaagggaacaaattgataccacattattaa  
tgtgacatggattcaaaaacaattaggcttaagtgaagacaactgaagtttagctcatgtatcgaactcagggtttatgat  
attaaagaacttaagcatagacaaatgagaaatcctgatgatagtcagtggaattgttttgactatgaattgattatccctgg  
tgatgtttataactaactgggaactgataactttggacatttgattgacactgctgatgatttagctttaatgcaaattaagca  
gccatagattacatttctataaatgtggagaacattttatcttaaagttgagaaatgtacagagataggatatctgtatgtgg  
tgaaattatactgttttacctgtggagctgatggtaaggatctgattgtgaaattactgtgcatccggtagtgtccctatac  
tgaattgagtcattatctaattggttctatttggtttaagcagtagacaagtgaatgtaataattccttctatgcaacctcaattatta  
cagtaaatacctctgttgagtgttttaataataattcaccctccattacagaccagacagttttacaaatactgcgatttgatg  
ttccacatttgtttgacgctgccatatactgactgcattttggctcatttgaatctatgaaataatcataggtaccacccatga  
tgctatagatgtattaacgcaaaagatacattctgagttattacgtatagatattcatgaaggagattttcctcaatggatgcaga  
accttggtaaagctttaaatacattatggcctggaaatgggaaaagctatttctgctgtaggagaaggattagggaaaatggga  
aatggatcttggtagcattggtaacatattgagatatttggatattaaaaccactgttactgtaataactggattatttctattt  
gtgttatatggcgactatttcttttgcctaaaggtaaacaagttcgaagaagatgaatgctgcagctttgacaggctcatta  
gaaacatttataacacctgtttaaactccaggatactggggatgtgtggacacactcctgttgggtgtggaagttagaaa  
gaatcaagatgtagtaacgtatgacctgtctaccgttgcgagatattgaacacaaaataagtgacgttaataatccttatgtg  
tttgatgactttaggattagtcgaattccatgatatacagagatattgggacatttcttggatcattatagtcactgcaat  
gatacatctcacaacaaacggaattgcaaagcctcccacagagtcccacggagacagaatctcaaggttcaggagacaa  
cagagtactcatatctacaactgtctccagcggtaacaagatacagacgccagtgaatatgaaagattttctatatacctcc  
cattacaatcagtggttccgttactgattctgacaccgaagggaactttacttccaggaatctcaagaccaattacatttYtg  
gcaactcatgggttcgaggaatttttctaateatcgttcttgaatgctcaataaagacaaacaaattttcaattgatattaca  
aactaaaCAAGAAGGACTtcTtAATattgtAAGCCATggAACtTTTGGtTGCACaGtTTT  
GCTTGCTTGCAATGGACCTcCTCATGAGACTTGTTTTGGTGGgATATGGAGaA  
ATACTTTGTTgCATCTGTATACAGAGtCTTaTGCATTTcAGTTGGGTGATTTTT  
ATcaatTGCAGAGTTCTCATGAAAAtATaACTTGTGATCATGTATGGTGTTCaCA  
TtGTAAATGtTTTGTGTTTCATGAAATcGcgGAAACACCTTTcTTTTCTTTTTACC  
AATAgATTtAGAATGTGGTGATTCTAATTTTGTGATTAATTTAAGTTAATGtTA  
TTAGCTGGaccaaGTAATcAtaAtTTtTTtTGCCAGCTAAAtGGAGAGGGACTGTTA  
CaGGCCTCAGTAgAaGTTAaGGTAAATGACTaTTACAagtCTaaGTAGAAGTTAA  
gTTAAAGGATtAACTACGCAGTACTAGTAGTTTCTGTTaCATAAGatTTTTTTA  
TGTTTTaAAGATTAGAATGTTTTgGtTATTCTGTAAAAATGATCAaCAGCTTGG  
CCTTGGTGATTTTCCTCTCCTGATTtCTtCTGAGtTTTTTTATGACCGTTAGTA  
CTTTTTTTGAGGTAGCGATACGCAGGTCTAGTTACAAAAtCTTATATAatATGC  
AgACCTTTGTTTATAcTcTGGGGCAGACCGAGAGACTGAAGCTAGACTTCAT  
ATCGAGACTGACTGGTATGTTTATTTTTATTTTTATGCATAaAAGTTTtAAcAG  
GCATTCTATGTTATAcTCTGTTTTAATTTTGGATTCCGTGAaTTTTTATtATTTTT  
cAATAAATAATtACTATgaTGAATTCTCAGTCCTTTCTTATAaTTGTGCTCACgA  
TTTCATCTATTGAATGTGAGACCTATCCACAgtATAAAATTGAAATTTGGTA  
ACTTATCACTTAGGGTgGAGAATAACCTctTTTTAAGACATTACATGGGAGGA  
AAGGTgTGAACCcATCACA

**Data set S2. The alignments used to build the phylogenetic trees for RT re presented in Fig.1**

>ERV-Spuma.a57-Ame

QYPVKPQAVAHMQTNSRPAMDQGVIIQSCAPSFKPDCTYRFVVDLFRILNAHCK  
TEAVQNHIFS---IAIQLTQMINKPSMQWVFHTPLSVETAFTFKGTRFQFTRIMQ  
GYKNSPSTFSSRIQSLADSNCWQYVDDIYITHENLSEHWQEVDRTSTKGYL  
INKSRIAHEVTFLGFTL

>ERV-Spuma.a65-Ame

QYPVKPQAVAHMQTIVDQLMDQGVIIRAVLPVLKPDGTYRFIVDFRILNAHCK  
TEAVQNHSSGLLANLHRCKYKTNLDLGNFYFTQPLIETAFTFKGTHFQFTRI  
MQGYKNAPSIFSSRIQSLADINC-QYVDDI-ITHENISEHV-EVDRTVIHTKGYPI--  
-----

>ERV-Spuma.a9-Ame

-HPVKPQAVAHMQTTVDQLMDQGVITSPVLPVLKPDGTYRFIVDFLILKAHCK  
TEAVQNHSSGLLANLHRCKYKTNFDLGNFYFTQPLSVETAFTFKGTNFQFT  
RIMQGYKNSPSTFSSRIQSLADINCWQYVDDIYITHENLSEHLQEVDRTVIHTK  
EYLIKKSRIHEVTFLGFTL

>ERV-Spuma.a80-Ame

-----AVPHMQTIVDQLMDQGVITSPVLPVLKPDGIYRFIVDFRILNAHCKTEAV  
QNQHSSGLLANVQGCKYKTNLDLGNFYFTQPLSVETAFTFKGTHFQFTRIMQ  
GYKNSPSTFSSGIQSLADINGWQYVDDIYITHENLSEHLQEVDRTVIHTKGYLI  
KKSRIAHEVTFLGFTL

>ERV-Spuma.a20-Ame

QYPVKPQAVAHMQTIVDQPMQGVIIISPVLKPDGTYRFIVDFKILNAHCK  
TEAVQNHSSGLLANLHRCKYKTNLDPGNGFYFTQPLSMETAFTFKGTHFHFN  
RIMQGYTNSPSTFSSRIQSLADINCWQYVDDIYITHENLSEYLQEVDRTVIHTK  
GYLIKKSRIAHEVTFLGFTL

>ERV-Spuma.a102-Ame

-----VAHLQTIVDQLMDQGVIIISLLVPVLKPDGTYRFIVDFRILNAHCKTEAVQ  
SQHSSGLLANLHRCKYKTNLDLGNFYFTQPLSVETSFTFKGTHFQFTRIMQRY  
TNSPSTFSSIIQSLADINCWQYVDDIYITHENLSKHLQEVDRTVIHTKGYLIKKS  
RIAHEVTFLGFTL

>ERV-Spuma.a52-Ame

QYPVKPQAVAYMQTIVDQLMDQGLIISPVLKPDGTH-FIVDIRILNAHCKT  
EAIQNQHSSGLLANLHRCKYKTNLDLGNFYFTQPLSVETAFAFKGTHFQFTRI

MQGYNNPSTFSSRIQSLADINCWQYVDDIYLTHENLSEHLQEVDRIHTKG  
YLIKKSRIAHEVTFLGFTL

>ERV-Spuma.a101-Ame

QYPVKPQAVAHMQTIVDQLMDQGVKSPVLPVLKPDGTYRFIVDFRILNAHC  
KTEAVQNQSSGLLANLHRC-YKTNLDLNGYFTQPLSIETAFTFKGTHFQFT  
RIMQGYKNSTSTFSSRIQSLADINCWQYVDDI-ITHENLSEHLQEVDRIHTK  
GYLVKKSRIAHEVTFLGFTL

>ERV-Spuma.a49-Ame

AVS-SPQAVAHMQTIVNQLMDQGVIIIPVLPVLKPDGTKSFIVDFRILNAHCKTE  
AVQNQHSSGLLANLHRCKYKTNLDLNGYFTQPLSIETTFTFKGTHFQFTRIM  
QGYKNPSTFSSRIQSLADINCWQYVDDIITHENLSEHLQEVDSDVIHTKGYL  
IKKSRIAHEVTFLGFTL

>ERV-Spuma.a10-Ame

QYPVKPQAVAHLQTIVDQLMDQGVIIIPVLPVLKPDGTYRFIVDFRILNAHCKT  
EAAQNQHSSGLLANLHRCK-KTNLDLNGYFTQPLSIETAFTFKGANFQFTRII  
QGYKNPSTFSSRIQSLADINCWQYVDDIYI-----TKGYLISKRIAHE  
VTFLGFTL

>ERV-Spuma.a42-Ame

QYPVKPQAVAHMQTIVDQLMDQGVIIIPVLPVLKPDGTYHFIVDFRILNAHCK  
TEAVQNQHSSGLLANLHRYKYKTNLDLNGHFTQPLSVETAFTFKGTHFQFT  
RIIQGYTNSPSTFSSRIQSLADINCWQYVDDIYITQVNLGEQLQEVD--IHTKG  
YLIKKSRTAHEVTFLGFTL

>ERV-Spuma.a21-Ame

QYPVKPHAVAHMQTILDQLMDQGVITSPVLPVLKPDGTCRFIVDF-ILNAHCK  
TEAVQNQHSSGLLANLHRCKYKTNVDLNGYFTQPLSVETAFTFKGTHFQFT  
RIMQGYINPSTFSSRIQSLADINCWQYVDDIYITHENLSEHLQQVDRVIHTK  
GYLIKKSRIAH-VTFLGFTL

>ERV-Spuma.a54-Ame

QYPVKPQAVAHMQTIVDQLM-YGVIIPVLPVLKPDGTYRFIVDFRILNAHCKT  
EYVQNQHSSGLLANLHRCKYKTNLDLNGYFTQPLSVETAFTFKGTHFQFTRI  
MQGYKNPLSTFSSRIQSLANINCWQYVDDIYITHENLSEHLQEVD-----  
-----

>ERV-Spuma.a97-Ame

QYPVKPQAVAHMLTIVDQLMDQGVITSPVLPVLKPDGTYRFIEDFRILNAHCK  
TEAVQNQHSSGLLANLHRCKYKTNLDLNGYFTQPLSVETAFTFKGTHFQFT  
RIMQGYTNSPSTFSSRIQSLADINCWQYVDDIYITHENLSEHLE-----SR  
IAHEVTFLDFQM



>ERV-Spuma.a74-Ame

QYPVKPQAVAHMQTIVDQLMDQEVIIISPVLVLPVKPDGTYRFIVDFRILNAHCK  
TEAIQNQHSSGLLANLHRCKYKTNLDLGNGYFTQPLSVETAFTFKRTHFQFT-  
VMQGYKNPSTFSSRIQSLLADINCCQYV-DIYITHENLSEHLQEVERTVIHTKGY  
LIKKSRIAHEVTFLGFTL

>ERV-Spuma.a96-Ame

QYPVKPQAVAHMLTIVDQLTDQGVIIISPVLVLPVKHGDGTYRFIVDFRILNAHCKT  
EAVQNQHSSGLLANLHRCKYKTNLDLGNGYFTQPLSVETAFTFKGTHFQFTRI  
MQAYKNPSTFSGRIQSLLADNNCWQYVDDIYITHENLREHLQEVEVSFTRWK  
DTLINKSRIAHEVTFLGFTL

>ERV-Spuma.a63-Ame

QYPVKPHAVAHMQTIVDQLMDQGVIIISLVLVLPVKPDGSYRFIVDFRILNAHCK  
TETVQNQHSSGLLANLHRCKYKSNLDLGNGFFFTQPLSVETAFTFKGTHFQFTR  
IMQGYKNPSTFSSRIQSLLVDNNCWQSVDDIYITHEDLDERLQQVDRVIHTK  
GNLIKKSRIVHEVTFLGVTL

>ERV-Spuma.a79-Ame

QYSAKPQAVAHMQTIVDQLMDQGVIIISLVLVLPVKPDGTYRFIVDFRILNAHCK  
TEAVQNEHSSGLLANLHRCKYKTNLDLGNGYFTQPLSVETAFTFKGTHFQFT  
RIMQGYKNPSTFSSKIQNLIADINCWQYV-DIYITHENLSEHLQEVDSSHSHVR-  
--IKNQELI-VLPFLGFTL

>ERV-Spuma.a73-Ame

QYPVKPQAVAHMQTILDQPMQGVIIISPVLVLPVKPDSTYRFIFEFRILNAHCKT  
EAVQNQHSSGLLANLHRCKYKTNLDLGNGYFTQPLTVKTAFFPKGTHFQFTTI  
MHGYRNPSTFSSRIQSLLADINCWQCVDDIYITHENLSEHLQQVDRVIHTKGY  
YLIRKSGIANEDVFLGFTL

>ERV-Spuma.a13-Ame

QYPVKPQAVAHMQTIVDQLMNQGVII-----VLKPDGTYHFIVDFRIFNAHCKTE  
AVQNQHSSGLLANLHRFKYKTNLDLCNGYFTRPLSVETAFTFKGTHF-FTRIM  
QGYKNPSTFSSRIQSLLADINCWQYVDDIYITHENISEHLQEVERTVIHMKGYL  
I-----

>ERV-Spuma.a26-Ame

QYPVKPQAVAHMQTIVDQLMDQ-VIISPVLVLPVKPDGTYRYIVDFRMLNAHCK  
TEAVQNQHSPGLLANLHRCKYKTILDLGNG-FTQPLCAETAFTFKGTHLQFTRI  
TQGYKTSPSTFSSRIQYLLADINC-QYVDDIYIETHETLSEHFKEVDRVIHTKGYL  
IKKSRIAHEVTFLGFTL

>ERV-Spuma.a62-Ame

QYPVKPQAVALIQTIVDLLMDQGIIISPVLPIKPDATYSFIVDFRILNAHCKTEA  
VQNHSSVLLANLYRCKYQTNLDLGNHFTQPLSIETAFTFKGTHFQFTRIM-G  
YKNSPNTFSSRIQSLLADINCWQY--DVYITHENLSEHLQEVDQVIHTKGYPIRK  
SRIAHEVTFLGFSL

>ERV-Spuma.a85-Ame

QYPVKPQAVAHMQTIVDQLMDQGVIIISPVLVLPKPDGTYCFIVDFRMLNADC  
KIEAVQSQHSSGLQANLHRCKYKTNLDLGNQYFTQPLSVETAFTFKGTHFQFT  
-IMQWYKSSPSTFSSRIQSLLADINCWQNVDDI-ITHENLGEHLQEVDKSFTSKD  
TRLKKSRIANDVTFLGFSL

>ERV-Spuma.a22-Ame

-----VTHMQIIVDQLMDQGVIIISPVPVLPKPDGTYCFIVDFRILNAHCKTEAVP  
NQHSSGLVANLHCKYRTNLDLGNQYFTQPLSVKTAFMFKGAHFQFTRIVQ---  
NSPSTFSSRIQSLLADINCWQYVDDIYIPH-NLSEHLQEEDRVIHTKGYLILKSRI  
AHEVTFLGFSL

>ERV-Spuma.a83-Ame

-----PVLKPDGTTRFIVNFRILNAHCKTGGHPDQHSSGFLAN  
LHRCKHKTNLDLGNQYFTQPLSIETAFTFEGTHFQFTRLMKGYENSPSTFLSRI  
QSLLADINLGQYVDDIYITHENHIEHLQEVNRVIHTKGYPIKKSRIAHEVTFLG  
FTL

>ERV-Spuma.a84-Ame

QYPVTPQAVVHVQTISSRLAHITLMVPTVL-----LILEF----MHTKTEAVQNNQ  
HSSGLLDN-HRCKYKTNLDLGNQYFTQPLSVETVFTFKGTYFQVTGIMQGYT  
NSPSTFSNRIQCLLADINCWQYVEDIYNTHENLSEHLQQVDRVIHTKGYPIKKS  
GIAHEVTLVGFSL

>ERV-Spuma.a69-Ame

QLPTKPTSSSNLAT-----SGFKTWRFIVDLRIFNAHCKTEAIQNQHSS  
GLLAKLHRCKYKTNLDIGNQYFTQTLVETAFTFKGTNFQLSRIMQRHKNT  
PTFSSRIQSLLADINCWQHVDIYITHENLSEHFQEVDRIHTKGYLIT---IKNS  
LGYLSHSF

>ERV-Spuma.b11-Ame

QYPTPLPAVPHIQKTITQLVDQGVIIITPVLVPIKPDHTYRLVLDYRGLNAHART  
DAVQNLHSSGLLNILRNKYKTVLDLGNQFFAQPLAPETAFTHRGKHFQMTR  
LMQGYKNSPGIFSSRIQTLTLDINCWQYVDDIYCTDDDLEEHLERVDQIVRTK  
GYIFKKSRIAHEVTFLGFSL

>ERV-Spuma.b10-Ame

QYPTPLPAVPHIQKTITQLVDQGVIIITPVLVPIKPDHTYRLVLDYRELNAHARTD  
AVQNLHSSGLLNILRNKYKTVLDLGNQFFAQPLAPETAFTHRGKHFQMTRL

MQGYKNSPGIFSSRIQTLLADINCWQYVDDIYCTDDDLEEHLEKVDQIVRTKG  
YIFKKSIAHEVTFLGFTL

>ERV-Spuma.b6-Ame

QYPTPLPAVPHIEKTITQLVDQGVIIPTVLPVIKPDHTYRLVLDYRELNAHARTD  
AVQNLHSSGLLNNILRNKYKTVLDLGNNGFFAQPLAPETAFTHRGKHFQMTRL  
MQGYKNSPGIFSSRIETLLADINCWQYVDDIYCTDDDLEEHLEKVDQIVRTKG  
YIFKKSIAHEVTFLGFTL

>ERV-Spuma.b1-Ame

QYPTPLPAVPHIQKTITQLVDQGVIIPTVLPVIKPDHTYRLVLDYRELNAHARTD  
AVQNLHSSALLNNILRNKYKTVLDLGNNGFFAQPLAPETAFTHRGKHFQMTRL  
MQGYKNSPGIFSSRIQTLLADINCWQYVDDIYCTDDDLEEHLEKVDQIVRTKG  
CIFKKSIAHEVTFLGFTL

>ERV-Spuma.b16-Ame

QYPTPLPAVPHIQKTITQLVDQGVIIPTVLPVIKPDHTYRLVLDYRELNARARN  
DAVQNLHSSGLLNNILRNKYKTVLDLGNNGFFAQPLAPETAFTHRGKHFQMTR  
LMQGYKNSPGIFSSRIQTLLAHINCWQYGGDIYCTDDDLEEHLEKVDQIVRTKG  
GYIFKKSIAHEVTFLGFTL

>ERV-Spuma.b17-Ame

QYPPPLPDVPHIQKTITQLVDQGVIIPTVLPVIKPDHTYRLVLDYIELNALARTD  
AVQNLHSSGLLNNILRNKYKTVLDLGNNGFFAQPLAPETAFTMNRGKHFQMTRL  
MQGYNSPGIFSSRIQTLLADINCWQHVDIYCTDDDLEEHERVDQIVRTKG  
YIFKKSIAHEVTFLGFTL

>ERV-Spuma.b5-Ame

QYPTPLSAVPHIQKTITQLVDQGVIIPTVLPVSKPYHTYRLVLDYREFNAHART  
DAVQNLHSSGLLNNILRNKYKTVLDLGNNGFFAQPLAPERAFTHRGKHFQMT  
WLMQGYKNSPGIFSSRGQTLLADINCWQYVDDI-CTDDDLEEYTERVDHIVHT  
K--IFKKSIAHEVTFLGFTL

>ERV-Spuma.b12-Ame

QYPTPLPAVPHIQKTITQLVDQGVIIPTVLPVIKPDHTYRLVLDYRELNAHARTD  
AVQNLHSSGLLNNILRNKYKTCLEMGSLHNHWHLRATSTFRHG-----CKDN  
KNSPGIFSSRIQTLLADINCWQYVDDIYCTDDDQRAPESRPDSAYSSKGYIFKK  
SLIAHEVTFLGFTL

>ERV-Spuma.a58-Ame

SRPANGPG-----INHSVLPVLKPDGTPF----YCRFNFECTLDRGRPEPTF  
WIASQL--TQMINKPSRQWYFTQPLSVETAFTFKGTHFQFTRIMRGYKNSPST  
FSSRIQSLA-----DILIPMRNLSEHLQEVDRIHTKGYLIPKSRIAHEVTFLGF  
TL

>ERV-Spuma.a7-Ame

NHPATKAVSSTT-----QTIVPVSNPKAS----PFKNLNAHCKTEAVQNHSS  
GLLANLHRCKYKN-----PATFKCRKIHFSA----GIYKVTSTFSSRIQSLLA  
DINCWQYVDDIYITHDNLSEHFLEVDRIHTKGYLIKKSRIAHEVTFLGFTL

>exNFVtwe.41

-----KKYKTTLDISNGFFCQ  
NIAPETSFSALGSQKKFCRLPQGYKNSPGLFAARVTSILHDIEALS YVDDIYLTD  
DELLQHLSRVARIVVGIGYKFKKTKIAFSVLFLGYEL

>exNFVtwe.17

-----KKYKTTLDISNGFFCQ  
NIAPETSFSALGSQKKFCRLPQGYKNSPGLFAARVTSILHDIEALS YVDDIYLTD  
DELLQHLSRVARIVVGIGYKFKKTKIAFSVLFLGYEL

>exNFVtwe.30

QYPIKHEARAPVKEILTQLEYQGVIENPLFPVAKPDHSFRIVLDYRHLNSHTRT  
FAIQNAHSTALINNIVRKKYKTTLDISNGFFCQNLAEESAFS-FGSQKRFCRLPQ  
GYKNSPGLFSARVTSILHDIEALS YVDDIYLTD DDDLYIHLVRVDRIILGFGYKFR  
KSKIAFSVLFLGYEL

>exNFVtwe.16

QYPIKHEARAPVKEILTQLEYQGVIENPLFPVAKPDHSFRIVLDYRHLNSHTRT  
FAIQNAHSTALINNIVRKKYKTTLDISNGFFCQNLAEESAFS-FGSQKRFCRLPQ  
GYKNSPGLFSARVTSILHDIEALS YVDDIYLTD DDDLYIHLVRVDRIILGFGYKFR  
KSKIAFSVLFLGYEL

>exNFVtgr.88

QYPIKRDAKSQIKEILSQLEYQGVIENPLF-ILKLDQSYRIVLDYRLLNSHTRTFA  
IQNTHSTALVNNIGRKEIKTTLDISNGFFSQNLAPETVFSALGFQKRFSRLPMG  
YKNSPGVFAARIISILHEIEALS YVDDIYLTD DEIRPHLEGVSCIILRLGYKFKKS  
KIAYSVLFLGYEL

>exNFVtgr.86

QYPIKRDAKSQIKEILSQLEYQGVIENPLF-ILKLDQSYRIVLDYRLLNSHTRTFA  
IQNTHSTALVNNIGRKEIKTTLDISNGFFSQNLAPETVFSALGFQKRFSRLPMG  
YKNSPGVFAARIISILHEIEALS YVDDIYLTD DEIRPHLEGVSCIILRLGYKFKKS  
KIAYSVLFLGYEL

>exNFVtgr.85

QYPIKRDAKSQIKEILSQLEYQGVIENPLF-ILKLDQSYRIVLDYRLLNSHTRTFA  
IQNTHSTALVNNIGRKEIKTTLDISNGFFSQNLAPETVFSALGFQKRFSRLPMG  
YKNSPGVFAARIISILHEIEALS YVDDIYLTD DEIRPHLEGVSCIILRLGYKFKKS  
KIAYSVLFLGYEL

>exNFVtgr.84

QYPIKRDAKSQIKEILSQLEYQGVIENPLF-ILKLDQSYRIVLDYRLLNSHTRTFA  
IQNTHSTALVNNIGRKEIKTTLDISNGFFSQNLAPETVFSALGFQKRFSRLPMG  
YKNSPGVFAARIISILHEIEALS YVDDIYLTDDDEIRPHLEGVSCIILRLGYKFKKS  
KIAYSVLFLGYEL

>exNFVtgr.83

QYPIKRDAKSQIKEILSQLEYQGVIENPLF-ILKLDQSYRIVLDYRLLNSHTRTFA  
IQNTHSTALVNNIGRKEIKTTLDISNGFFSQNLAPETVFSALGFQKRFSRLPMG  
YKNSPGVFAARIISILHEIEALS YVDDIYLTDDDEIRPHLEGVSCIILRLGYKFKKS  
KIAYSVLFLGYEL

>exNFVtgr.82

QYPIKRDAKSQVKEILDQLEYQGVIENPLFPVSKPDQSYRIVLDYRHLNSHAR  
TYAIQNTHSTALINNICKRKYKTRLDISNGFFSQNLAQETAFSVLGFQMRFSRL  
PMGYKNSPGVFAARIIAILYHVAALS YVDDIYLTDDDLLPHLKRVSIIHLGY  
KLKKSEIAFSVVFLGYEL

>CpyFLERV-1

QYPIKQEAKKQVREILDQLEYQGVIENPLFPVAKPDNSYRLVLDYRHLNS-CK  
TLAVQNAHSAALMNNIVRKKYKTTLDTSNGFFCQNIAPETAFSIMGTQRQFCR  
LPQGFKNSPGLFSARVT--LLQIYALS YVDDIYLTDDDLDRLNRVSTIIL-EGYK  
F-----

>exNFVtgr.20

QYPI---LEAQAKEILTQLEYQEDIENPLFSVAKPNLSYCVLNRYRNLNTNTRTYI  
VQNAHSAALLNNIQRKDITTTLDIKNGFFCQNIAPETAFASTFGHQRFRRLPQG  
YKNSPGLFSARVIELIQEIEAVSYVDDIYLTDDDMTQHLKRVDKIVVGKGYKM  
QKSHIGHNVMFLGFEL

>exNFVtgr.23

QYPI---LEAQAKEILTQLEYQEDIENPLFSVAKPNLSYCVLNRYRNLNTNTRTYI  
VQNAHSAALLNNIQRKDITTTLDIKNGFFCQNIAPETAFASTFGHQRFRRLPQG  
YKNSPGLFSARVIELIQEIEAVSYVDDIYLTDDDMTQHLKRVDKIVVGKGYTM  
QKTHIGHNVMFLGFEL

>exNFVtgr.25

QYPI---LEAQAKEILTQLEYQEDIENPLFSVAKPNLSYCVLNRYRNLNTNTRTYI  
VQNAHSAALLNNIQRKDITTTLDIKNGFFCQNIAPETAFASTFGHQRFRRLPQG  
YKNSPGLFSARVIELIQEIEAVSYVDDIYLTDDDMTQHLKRVDKIVVGKGYTM  
QKTHIGHNVMFLGFEL

>CpyFLERV-2

QYPIKGEARASVLEILQQLEYQGVIENPLFPVIKPDGTHRLVFDYRHLNGHCRT  
FAVQNTTHGSALVDSLVRKKYKTTLDISNGFYSHNLDPQTGFVSVLGKQKLFKRL  
PMGYKNSPGVFSARIITLLQLI-AFSYVDDIYLTDDEMMAHLERVGHLIV-IGYK  
FAKSHIAH-VLFLGYEL

>NviFLERV

QYPIKREAKASVKEILTHLENQDVIENPLFPVAKPDHSYHIVLDYRHLNSHTRS  
FAIHNTSSSTLVNNLTRKKYKTTLGISN-FFTQNLAPESTFTCLGIQYKFWRLP  
MGYKNSLGVFAVRIIELLQLV-AVSYIDYIYVTDDEMQQHLARVDRIII-SGYKIK  
KSKIAF-VLFLGYKL

>PwaFLERV

-----AKAPMREILTQPEYQQRV-ESPLFPVPKPDHSYRIVIDCRHLNSHTQTFVIQ  
NSPSMALINNIICKKYKTYSDISNGLFC-NIATETAFASTLISQDIFCQLPQVYKNS  
PGLFAARVTSILHSI-ALSSADDIYLTDDDRNAHLATVDRTVL-HGYDFRKT KH  
DF-VLFLGHKL

>ERV-Spuma.a24-Ame

QYPVKPHAVGHMQTIVDQLMDQGVII SPVLPVLKPHGTYHFIVDFRILNAHCK  
SRPEPTQF-----WMDCKKQTNLSLGN-----SFPFTRIMQGIKHSQAEY  
RAYLQTFLI-----VAVHHPNLSEHLQEVDRIHTKGYLIKTKIKNSSGYLSH  
TF

>ERV-Spuma.12-Smu

QYKINHAAIPSIQIVIDDLVKQGIKTAVYVPV PKPNGSWRLVLDYREV NKVTPV  
VSAQNTHSVSILHGLVRKRFKTTLDLANGFWSHPIDTDTAFTWQ GKQYVWTR  
LPQGFVN SPALFTADVVSLL---NIEVYVDDIYLSHDSEEEHIAVLTQVLDTAGYI  
VKKSQIARKVTFLGFDI

>ERV-Spuma.4-Smu

QYKINHAAIPSIQIVIDDLVKQGIKTAVYVPV PKPNGSWRLVLDYREV NKVTPV  
VSAQNTHSVSILHGLVRKRFKTTLDLANGFWSHPIDTDTAFTWQ GKQYVWTR  
LPQGFVN SPALFTADVVSLL---NIEVYVDDIYLSHDSEEEHIAVLTQVLDTAGYI  
VKKSQIARKVTFLGFDI

>ERV-Spuma.2-Smu

QYKINHAAIPSIQIVIDDLVKQGIKTAVYVPV PKPNGSWRLVLDYREV NKVTPV  
VSAQNTHSVSILHGLVRKRFKTTLDLANGFWSHPIDTDTAFTWQ GKQYVWTR  
LPQGFVN SPALFTADVVSLL---NIEVYVDDIYLSHDSEEEHIAVLTQVLDTAGYI  
VKKSQIARKVTFLGFDI

>ERV-Spuma.5-Smu

QYKINHAAIPSIQIVIDDLVKQGIKTAVYVPV PKPNGSWRLVLDYREV NKVTPV  
VSAQNTHSVSILHGLVRKRFKTTLDLANGFWSHPIDTDTAFTWQ GKQYVWTR

LPQGFVNSPALFTADVVSLL---NIEVYVDDIYLSHDSEEEHIAVLTQVLDTAGYI  
VKKSQIARKVTFLGFDI

>ERV-Spuma.17-Smu

QYKINHAAIPSIQIVIDDLVKQGIKTAVYVPKPNGSWRLVLDYREVNKVTPV  
VSAQNTHSVSILHGLVRKRFKTTLDLANGFWSHPIDTDTAFTWQGGKQYVWTR  
LPQGFVNSPALFTADVVSLL---NIEVYVDDIYLSHDSEEEHIAVLTQVLDTAGYI  
VKKSQIARKVTFLGFDI

>ERV-Spuma.16-Smu

QYKINHAAIPSIQIVIDDLVKQGIKTAVYVPKPNGSWRLVLDYREVNKVTPV  
VSAQNTHSVSILHGLVRKRFKTTLDLANGFWSHPIDTDTAFTWQGGKQYVWTR  
LPQGFVNSPALFTADVVSLL---NIEVYVDDIYLSHDSEEEHIAVLTQVLDTAGYI  
VKKSQIARKVTFLGFDI

>ERV-Spuma.9-Smu

QYKINHAAIPSIQIVIDDLVKQGIKTAVYVPKPNGSWRLVLDYREVNKVTPV  
VSAQNTHSVSILHGLVRKRFKTTLNLANGFWSHPIDTDTAFTWQGGKQYVWTR  
LPQGFVNSPALFTADVVSLL---NIEVYVDDIYLSHDSEEEHIAVLTQVLDTAGYI  
VKKSQIARKVTFLGFDI

>ERV-Spuma.1-Smu

QYKINHAAIPSIQIVIDDLVKQGIKTAVYVPKPNGSWRLVLDYREVNKVTPV  
VSAQNTHSVSILHGLVRKRFKTTLNLANGFWSHPIDTDTAFTWQGGKQYVWTR  
LPQGFVNSPALFTADVVSLL---NIEVYVDDIYLSHDSEEEHIAVLTQVLDTAGYI  
V-----

>ERV-Spuma.15-Smu

QYKINHAAIPSIQIVIDDLVKQGIKTAVYVPKPNGSWRLVLDYREVNKVTPV  
VSAQNTHSVSILHGLVRKRFKTTLNLANGFWSHPIDTDTAFTWQGGKQYVWTR  
LPQGFVNSPALFTADVVSLL---NIEVYVDDIYLSHDSEEEHIAVLTQVLDTAGYI  
V-----

>ERV-Spuma.3-Smu

QYKINHAAIPSIQIVIDDLVKQGIKTAVYVPKPNGSWRLVLDYREVNKVTPV  
VSAQNTHSVSILHGLVRKRFKTTLDLANGFWSHPIDTDTAFTWQGGKQYVWTR  
LPQGFVNSPALFTADVVSLLSASNIEVYVDDIYLSHDSEEEHIAVLTQVLDTAG  
YIVKKSQIARKVTFLGFDI

>BFVbta

QYHINPRAKADIQIVIDDLRQGVLRTPVYVPKADGRWRMVLVLDYREVNKVT  
PLVATQNCHSASILNTLYRGPYKSTLDLANGFWAHPKIPETAFTWGGKTYCWT  
VLPQGFLNSPALFTADVVDILKDINVQVYVDDVYVSSATEQEHLDILETIFNSA  
GYIVKKSCLAKEVEFLGFSI

>EFVeca

QYRINPKAKADIQIVIDDLLKQGVLPVYVPKPDGRWRMVLDYRAVNKVT  
PAIATQNCHSASLLNTLYRGQYKTTLDLANGFWAHPIQESTSFTWNGKSYVW  
TTLPQGFLNSPALFTADVVDLLKDINVEVYVDDVYFSNDTEEEHLKTMDLLF  
QQAGYIVKKSCLGQHVDFLGFQI

>FFVfca

QYHINPKAKPDIQIVINDLLKQGVLPVYVPKPNRWRMVLDYRAVNKVT  
LIAVQNSHSYGILGSLFKGRYKTTIDLSNGFWAHPIVPETAFTWQKQYCWTV  
LPQGFLNSPGLFTGDVVDLLQGINVEVYVDDVYISHDSEKEHLEYLDILFNKA  
GYIHKSNIANSVDFLGFQI

>SFVcae

QYPINPKAKASIQTVINDLLKQGVLPVYVPKPDGKWRMVLDYREVNTIP  
LIAAQNQHSAGILSSIFRGKYKTTLDLSNGFWAHSITPETAFTWLGGQYCWTR  
LPQGFLNSPALFTADVVDLLKEVNVQVYVDDIYISHDDPREHLEQLEKVFSLA  
GYVVKKSEIAQHVEFLGFNI

>SFVmcy

QYPINPKAKPSIQIVIDDLLKQGVLPVYVPKPDGKWRMVLDYREVNTIPL  
IAAQNQHSAGILSSIRGKYKTTLDLNGFWAHPITPETAFTWQKQYCWTRL  
PQGFLNSPALFTADVVDLLKEINVQAYVDDIYISHDDPQEHLEQLEKIFSLAGY  
VVKKSEIAQRVEFLGFNI

>SFVggo

QYPINPKARSSIQVVIDDLLKQGVLPVYVPIPKPDGRWGMVLDYREVNTIP  
LIAAQNQHSAGILATIVRKKYKTTLVLANGFWAHPITPETAFTWQKQYCWTR  
LPQGFLNSPALFTADVVDLLKEINVQAYVDDIYLSHDDPQEHLDQLEKVFQLA  
GYVVKKSEVAQKVEFLGFNI

>SFVpve

QYPINPKAKPSIQIVIDDLLKQGVLPVYVPKPDGRWRMVLDYREVNTIP  
LTAAQNQHSAGILATIVRQKYKTTLDLANGFWAHPITPETAFTWQKQYCWTR  
RLPQGFLNSPALFTADAVDLLKEVNVQVYVDDIYLSHDPHEHIQQLEKVFQL  
AGYVVKKSEIGQRVEFLGFNI

>SFVppy

QYPINPKAKESIQIVINDLLKQGVLPVYVPKPDGRWRMVLDYREVNTIPL  
IAAQNQHSAGILASIYRGTYKTTLDLANGFWAHPITPNTAFTWQKQHCWTR  
LPQGFLNSPALFTADVVDLMKHINVQVYVDDLYLSHDDPQEHLQVLLQVLLH  
HAGYVVKKSAIAQKVEFLGFNI

>SFVaxx



QYHINPKAKPSIQIVINDLLKQGVLRTPVYPVPKPDGKWRMVLDYRAVNKTIP  
LIAAQNQHSLGILTNLIRHKYKSTIDLSNGFWAHPITEDAFTWEGKQHVWTR  
LPQGFLNSPALFTADVVDILKEVGVSVYVDDIYISSPTMEEHFQVLDSIFRLTG  
YIVKKSALARYVNFLGFVI

>SFVssc

QYHINPKAKPSIQIVINDLLKQGVLTPIYPVPKTEGKWRMVLDYRAVNKTIP  
LIAAQNQHSAAGILTNLVRQKYKSTIDLSNGFWAHPIDQDTAFTWEGKQYVWT  
RLPQGFLNSPALFTADVVDLLKEINVNVYVDDIYVSTETINQHFQVLDKIFQLA  
GYVVKKSNLCRYVTFLGFTI

>SFVocr

QYHVNPAARPDIIQIVIDDLLKQGVLTPIYPVPKPDGKWRMVLDYRAVNKT  
VPAIGAQNCHAPGILSSLYRAKFKTTLDLSNGFWWSHPITPETAFTWQGSQYVW  
TRLPQGFLNSPALFTADVVDLCKHINVSAYVDDIYVSNDAEEHLRTLEQLFR  
MAGYIVKKSIGVSVDFLGFVI

>CoeEFV

QYPINTKAIPSIQVVINELLEQGVLMVAVLPVPKPDGTWRLVLDYRALNKHSE  
PVRAQNQHSSGILANIERKAYKSSVDLANGFWSHPIREEMAFTWCGFQYLWT  
RLPQGFLNSPALFSADVISLVGQLGVYCYVDDIYLTHDTEEEHLKILDQVLEIA  
GYVIKKSCLKRVDFLGFSL

>LmeFLERV

-----DQHSSGILANIERKAYKSSVDLTN  
GFWWSHPIREEMAFTWCSFQYLWTCLP-GFLNSPALFSADVISVGPVQYCYV  
DDIYLTHDTEEEHLKILDQVLEIAGYVIKKSCLKRRVDFLGFSL

>ERV-Spuma-Cma

QFKINPQAIPSIQIVINYLLKQGIPRTPVYPVPKGEGKWRLVLDYRAVNKVTPAI  
AAQSCHSTGILMQLTRKKYKTTLDLSRWVFGPILSPKIAFTWCGKQHVWTQL  
PQGFLNSPALFSADVVDLLKEIDVSVYVNDIYFLHDTEKEHLKTTRHLHNIRG  
QIHKKSEIGKRVNFLGFAI

>ERV-Spuma-Cbo

QFKINPQAISSIQIVINYLLKQGVPRTPVYPVPKGEGKWRLVLDYRAVNKVTPA  
IAAQNCHSTGILMQLTRKKYKTTLDLSRWVFGPILSPKQPLLGVAKQHVWTQ  
LPQGFLNSPALFSADVVDLLKEFDVSVYVNDIYFSDHTEKEHLKTTRHLHNIR  
GQIHKKSEIGKRVNFLGFAI

>SloEFV

QYQINQKAKLAMQTVINDLIKQGMLLTSIYPIPKTNG-FRMVLNVRAVTNVIPL  
IAVKNQCSTEILTQMQRKYKTTLDLSNGFRAHPIRKEMAYTWECKQLLWTR

LPLG--NSPALFTANIVDILKEIPVEVYVNDIYF---NVTEHLITLKLVLKLSGYMV-  
KSEIAKEVTIVHFDI

>ERV-Spuma-Spu

QYPINKAAINDIQKVINDLIAQGALITPVYPVPKPNGKWHMVLDYRALNRVSP  
SFNVQNLHVWH-----ARKFGKAQIQNYTGFLGSSYREQTAFSWQGTQYCWTR  
LPQGYLNSPALFSADVIQLLKNIGVHSYMDDIYFTNEDLDQHLATLKQIVTGA  
GYIIKKSQICRSVKFLGFL

>ERV-Spuma.41-Rbi

QYPVHKKFYNDLNIIISQKLTQGVLSPLLPVPKPNGSTRMVIDYRVLNASSET  
VAAQMLNPASTIDNLPRPRWKATLDLANGFWSIPISTSTAFTFRGKQYQYTRLP  
QGFKNSPVLFSAAVEELLQNINAVPYVDDIYLASDKLDVLWDSVVQLIQVEGF  
VAKARIGFEVKFLGFLI

>ERV-Spuma.10-Rbi

QYPVHKKFYNDLNIIISQKLTQGVLSPLLPVPKPNGSTRMVIDYRVLNASSET  
VAAQTLNPASTIDNLPRPRWKATLDLANGFWSIPISTSTAFTFRGKQYQYTRLP  
QGFKNSPVLFSAAVEELLQNINAVPYVDDIYLASDKLDVLWDSVVQLIQVEGF  
VAKARIGFEVKFLGFLI

>ERV-Spuma.45-Rbi

QYPVHKKFYNDLNIIISQKLTQGVLSPLLPVPKPNGSTRMVIDYRVLNASSET  
VAAQTLNPASTIDNLPRPRWKATLDLANGFWSIPISTSTAFTFRGKQYQYTRLP  
QGFKNSPVLFSAAVEELLQNINAVPYVDDIYLASDKLDVLWDSVVQLIQVEGF  
VAKARIGFEVKFLGFLI

>ERV-Spuma.60-Rbi

QYPVHKKFYNDLNIIISQKLTQGVLSPLLPVPKPNGSTRMVIDYRVLNASSET  
VAAQTLNPASTIDNLPRPRWKATLDLANGFWSIPISTSTAFTFRGKQYQYTRLP  
QGFKNSPVLFSAAVEELLQNINAVPYVDDIYLASDKLDVLWDSVVQLIQVEGF  
VAKARIGFEVKFLGFLI

>ERV-Spuma.46-Rbi

QYPVHKKFYNDLNIIISQKLTQGVLSPLLPVPKPNGSTRMVIDYRVLNASSET  
VAAQTLNPASTIDNLPRPRWKATLDLANGFWSIPISTSTAFTFRGKQYQYTRLP  
QGFKNSPVLFSAAVEELLQNINAVPYVDDIYLASDKLDVLWDSVVQLIQVEGF  
VAKARIGFEVKFLGFLI

>ERV-Spuma.35-Rbi

QYPVHKKFYNDLNIIISQKLTQGVLSPLLPVPKPNGSTRMVIDYRVLNASSET  
VAAQTLNPASTIDNLPRPRWKATLDLANGFWSIPISTSTAFTFRGKQYQYTRLP  
QGFKNSPVLFSAAVEELLQNINAVPYVDDIYLASDKLDVLWDSVVQLIQVEGF  
VAKARIGFEVKFLGFLI

>ERV-Spuma.34-Rbi

QYPVHKKFYNDLNIIISQKLTQGVLSPLLVPKPNGSTRMVIDYRVLNASSET  
VAAQTLNPASTIDNLPRPRWKATLDLANGFWSIPISTSTAFTFRGKQYQYTRLP  
QGFKNSPVLFSAAVEELLQNINAVPYVDDIYLASDKLDVLWDSVVQLIQVEGF  
VVAKARIGFEVKFLGFLI

>ERV-Spuma.4-Rbi

QYPVHKKFYNDLNIIISQKLTQGVLSPLLVPKPNGSTRMVIDYRVLNASSET  
VAAQTLNPASTIDNLPRPRWKATLDLANGFWSIPISTSTAFTFRGKQYQYTRLP  
QGFKNSPVLFSAAVEELLQNINAVPYVDDIYLASDKLDVLWDSVVQLIQVEGF  
VVAKARIGFEVKFLGFLI

>ERV-Spuma.6-Rbi

QYPVHKKFYNDLNIIISQKLTQGVLSPLLVPKPNGSTRMVIDYRVLNASSET  
VAAQTLNPASTIDNLPRPRWKATLDLANGFWSIPISTSTAFTFRGKQYQYTRLP  
QGFKNSPVLFSAAVEELLQNINAVPYVDDIYLASDKLDVLWDSVVQLIQVEGF  
VVAKARIGFEVKFLGFLI

>ERV-Spuma.14-Rbi

QYPVHKKFYNDLNIIISQKLTQGVLSPLLVPKPNGSTRMVIDYRVLNASSET  
VAAQTLNPASTIDNLPRPRWKATLDLANGFWSIPISTSTAFTFRGKQYQYTRLP  
QGFKNSPVLFSAAVEELLQNINAVPYVDDIYLASDKLDVLWDSVVQLIQVEGF  
VVAKARIGFEVKFLGFLI

>ERV-Spuma.23-Rbi

QYPVHKKFYNDLNIIISQKLTQGVLSPLLVPKPNGSTRMVIDYRVLNASSET  
VAAQTLNPASTIDNLPRPRWKATLDLANGFWSIPISTSTAFTFRGKQYQYTRLP  
QGFKNSPVLFSAAVEELLQNINAVPYVDDIYLASDKLDVLWDSVVQLIQVEGF  
VVAKARIGFEVKFLGFLI

>ERV-Spuma.11-Rbi

QYPVHKKFYNDLNIIISQKLTQGVLSPLLVPKPNGSTRMVIDYRVLNASSET  
VAAQTLNPASTIDNLPRPRWKATLDLANGFWSIPISTSTAFTFRGKQYQYTRLP  
QGFKNSPVLFSAAVEELLQNINAVPYVDDIYLASDKLDVLWDSVVQLIQVEGF  
VVAKARIGFEVKFLGFLI

>ERV-Spuma.26-Rbi

QYPVHKKFYNDLNIIISQKLTQGVLSPLLVPKPNGSTRMVIDYRVLNASSET  
VAAQTLNPASTIDNLPRPRWKATLDLANGFWSIPISTSTAFTFRGKQYQYTRLP  
QGFKNSPVLFSAAVEELLQNINAVPYVDDIYLASDKLDVLWDSVVQLIQVEGF  
VVAKARIGFEVKFLGFLI

>ERV-Spuma.42-Rbi

QYPVHKKFYNDLNIIISQKLTQGVLISPLLVPKPNGSTRMVIDYRVLNASSET  
VAAQTLNPASTIDNLPRPRWKATLDLANGFWSIPISTSTAFTFRGKQYQYTRLP  
QGFKNSPVLFSAAVEELLQNINAVPYVDDIYLASDKLDVLWDSVVKLIQVEGF  
VAKARIGFEVKFLGFLI

>ERV-Spuma.37-Rbi

QYPVHKKFYNDLNIIISQKLTQGVLISPLLVPKPNGSTRMVIDYRVLNASSET  
VAAQTLNPASTIDNLPRPRWKATLDLANGFWSIPLSTSTAFTFRGKQYQYTRLP  
QGFKNSPVLFSAAVEELLQNINAVPYVDDIYLASDKLDVLWDSVVKLIQVEGF  
VAKARIGFEVKFLGFLI

>ERV-Spuma.21-Rbi

QYPVHKKFYNDLNIIISQKLTQGVLISPLLVPKPNGSTRMVIDYRVLNASSET  
VAAQTLNPASTIDNLPRPRWKATLDLANGFWSIPISTSTAFTFRGKQYQYTRLP  
QGFKNSPVLFSAAVEELLQNINAVPYVDDIYLASDKLDMLWDSVVKLIQVEGF  
VAKARIGFEVKFLGFLI

>ERV-Spuma.36-Rbi

QYPVHKKFYNDLNIIISQKLTQGVLISPLLVPKPNGSTRMVIDYRVLNASSET  
VAAQTLNPASTIDNLPRPRWKATLDLANGFWSIPISTSTAFTFRGKQYQYTRLP  
QGFKNSPVLFSAAVEELLQNINAVPYVDDIYLASDKLDVLWDSVVKLIQVEGF  
VAKARIGFEVKFLGFLI

>ERV-Spuma.3-Rbi

QYPVHKKFYNDLNIIISQKLTQGVLISPLLVPKPNGSTRMVIDYRVLNASSET  
VAAQTLNPASTIDNLPRPRWKATLDLANGFWSIPISTSTAFTFRGKQYQYTRLP  
QGFKNSPVLFSAAVEELLQNINAVPYVDDIYLASDKLDVLWDSVVKLIQVEGF  
VAKARIGFEVKFLGFLI

>ERV-Spuma.65-Rbi

QYPVHKKFYNDLNIIISQKLTQGVLISPLLVPKPNGSTRMVIDYRVLNASSET  
VAAQTLNPASTIDNLPRPRWKATLDLANGFWSIPISTSTAFTFRGKQYQYTRLP  
QGFKNSPVLFSAAVEELLQNINAVPYVDDIYLASDKLDVLWDSVVKLIQVEGF  
VAKARIGFEVKFLGFLI

>ERV-Spuma.43-Rbi

QYPVHKKFYNDLNIIISQKLTQGVLISPLLVPKPNGSTRMVIDYRVLNASSET  
VAAQTLNPASTIDNLPRPRWKATLDLANGFWSIPISTSTAFTFRGKQYQYTRLP  
QGFKNSPVLFSAAVEELLQNINAVPYVDDIYLASDKLDVLWDSVVKLIQVEGF  
VAKARIGFEVKFLGFLI

>ERV-Spuma.15-Rbi

QYPVHKKFYNDLNIIISQKLTQGVLISPLLVPKPNGSTRMVIDYRVLNASSET  
VAAQTLNPASTIDNLPRPRWKATLDLANGFWSIPISTSTAFTFRGKQYQYTRLP

QGFKNSPVLFSAAVEELLQNINAVPYVDDIYLASDKLDVLWDSVVKLIQVEGF  
VVAKARIGFEVKFLGFLI

>ERV-Spuma.1-Rbi

QYPVHKKFYNDLNIIISQKLTQGVLISPLLVPKPNGSTRMVIDYRVLNASSET  
VAAQTLNPASTIDNLPRPRWKATLDLANGFWSIPISTSTAFTFRGKQYQYTRLP  
QGFKNSPVLFSAAVEELLQNINAVPYVDDIYLASDKLDVLWDSVVKLIQVEGF  
VVAKARIGFEVKFLGFLI

>ERV-Spuma.31-Rbi

QYPVHKKFYNDLNIIISQKLTQGVLISPLLVPKPNGSTRMVIDYRVLNASSET  
VAAQTLNPASTIDNLPRPRWKATLDLANGFWSIPISTSTAFTFRGKQYQYTRLP  
QGFKNSPVLFSAAVEELLQNINAVPYVDDIYLASDKLDVLWDSVVKLIQVEGF  
VVAKARIGFEVKFLGFLI

>ERV-Spuma.24-Rbi

QYPVHKKFYNDLNIIISQKLTQGVLISPLLVPKPNGSTRMVIDYRVLNASSET  
VAAQTLNPASTIDNLPRPRWKATLDLANGFWSIPISTSTAFTFRGKQYQYTRLP  
QGFKNSPVLFSAAVEELLQNINAVPYVDDIYLASDKLDVLWDSVVKLIQVEGF  
VVAKARIGFEVKFLGFLI

>ERV-Spuma.13-Rbi

QYPVHKKFYNDLNIIISQKLTQGVLISPLLVPKPNGSTRMVIDYRVLNASSET  
VAAQTLNPASTIDNLPRPRWKATLDLANGFWSIPISTSTAFTFRGKQYQYTRLP  
QGFKNSPVLFSAAVEELLQNINAVPYVDDIYLASDKLDVLWDSVVKLIQVEGF  
VVAKARIGFEVKFLGFLI

>ERV-Spuma.58-Rbi

QYPVHKKFYNDLNIIISQKLTQGVLISPLLVPKPNGSTRMVIDYRVLNASSET  
VAAQTLNPASTIDNLPRPRWKATLDLANGFWSIPISTSTAFTFRGKQYQYTRLP  
QGFKNSPVLFSAAVEELLQNINAVPYVDDIYLASDKLDVLWDSVVKLIQVEGF  
VVAKARIGFEVKFLGFLI

>ERV-Spuma.56-Rbi

QYPVHKKFYNDLNIIISQKLTQGVLISPLLVPKPNGSTRMVIDYRVLNASSET  
VAAQTLNPASTIDNLPRPRWKATLDLANGFWSIPISTSTAFTFRGKQYQYTRLP  
QGFKNSPVLFSAAVEELLQNINAVPYVDDIYLASDKLDMLWDSVVKLIQVEGF  
VVAKARIGFEVKFLGFLI

>ERV-Spuma.32-Rbi

QYPVHKKFYNDLNIIISQKLTQGVLISPLLVPKPNGSTRMVIDYRVLNASSET  
VAAQTLNPASTIDNLPRPRWKATLDLANGFWSIPISTSTAFTFRGKQYQYTRLP  
QGFKNSPVLFSAAVEELLQNINAVPYVDDIYLASDKLDMLWDSVVKLIQVEGF  
VVAKARIGFEVKFLGFLI

>ERV-Spuma.22-Rbi

QYPVHKKFYNDLNIIISQKLTQGVLISPLLVPKPNGSTRMVIDYRVLNASSET  
VAAQTLNPASTIDNLPRPRWKATLDLANGFWSIPISTSTAFTFRGKQYQYTRLP  
QGFKNSPVLFSAAVEELLQNINAVPYVDDIYLASDKLDMLWDSVVKLIQVEGF  
VVAKARIGFEVKFLGFLI

>ERV-Spuma.9-Rbi

QYPVHKKFYNDLNIIISQKLTQGVLISPLLVPKPNGSTRMVIDYRVLNASSET  
VAAQTLNPASTIDNLPRPRWKATLDLANGFWSIPISTSTAFTFRGKQYQYTRLP  
QGFKNSPVLFSAAVEELLQNINAVPYVDDIYLASDKLDVLWDSVVKLIQVEGF  
VVAKARIGFDVKFLGFLI

>ERV-Spuma.67-Rbi

QYPVHKKFYNDLNIIISQKLTRGVLISPLLVPKPNGSTRMVIDYRVLNASSET  
VAAQTLNPASTIDNLPRPRWKATLDLANGFWSIPISTSTAFTFRGKQYQYTRLP  
QGFKNSPVLFSAAVEELLQNINAVPYVDDIYLASDKLDVLWDSVVKLIQVEGF  
VVAKARIGFEVKFLGFLI

>ERV-Spuma.52-Rbi

QYPVHKKFYNDLNIIISQKLTQGVLISPLLVPKPNGSTRMVIDYRVLNASSET  
VAAQTLNPASTIDNLPRPRWKATLDLANGFWSIPISTSTAFTFRGKQYQYTRLP  
QGFKNSPVLFSAAVEELLQNINAVPYVDDIYLASDKLDVLWDSVVKLIQVEGF  
VVAKARIGFEVKFLGFLI

>ERV-Spuma.63-Rbi

QYPVHKKFYNDLNIIISQKLTQGVLISPLLVPKPNGSTRMVIDYRVLNASSET  
VAAQTLNPASTIDNLPRPRWKATLDLANGFWSIPISTSTAFTFRGKQYQYTRLP  
QGFKNSPVLFSAAVEEYLQNINAVPYVDDIYLASDKLDVLWDSVVKLIQVEGF  
VVAKARIGFEVKFLGFLI

>ERV-Spuma.50-Rbi

----KKFYNDLNIIISQKLTQGVLISPLLVPKPNGSTRMVIDYRVLNTSSETVAA  
QTLNPASTIDNLPHPRWKATLDLANGFWSIPISTSTAFTFRGKQYQYTRLPQGF  
KNSPVLFSAAVEELLQNINAVPYVDDIYLASDKLDVLWDSVVKLIQVEGFVVA  
KARIGFEVKFLGFLI

>ERV-Spuma.8-Rbi

QYPVHKKFYNDLNIIISQKLTQGVLISPLLVPKPNGSTRMVIDYRVLNASSET  
VAAQTLNPASTIDNLPHPRWKATLDLANGFWSIPISTSTAFTFRGKQYQYTRLP  
QGFKNSPVLFSAAVEELLQNINAVPYVDDIYLASDKLDVLWDSVVKLIQVEGF  
VVAKARIGFEVKFLGFLI

>ERV-Spuma.47-Rbi

QYPVHKKFYNDLNIIISQKLTQGVLISPLLVPKPNGSTRMVIDYRVLNASSET  
VAAQTLNPASTIDNLPRPRWKATLDLANGFWSIPISTSTAFTFRGKQYQYTRLP  
QGFKNSPVLFSAAVEELLQNINAVPYVDDIYLASDKLDELWDSVVKLIQVEGF  
VAKARIGFEVKFLGFLI

>ERV-Spuma.57-Rbi

QYPVHKKFYNDLNIIISQKLTQGVLISPLLVPKPNGSTRMVIDYRVLNASSET  
VAAQTLNPASTIDNLPRPRWKATLDLANGFWSIPISTSTAFTFRGKQYQYTRLP  
QGFKNSPVLFSAAVEELLQNINAVPYVDVIYLASDKLDVLWDSVVKLIQVEGF  
VAKARIGFEVKFLGFLI

>ERV-Spuma.55-Rbi

QYPVHKKFYHDLNIIISQKLTQGVLISPLLVPKPNGSTRMVIDYRVLNASSET  
VAAQTLNPASTIDNLPRPRWKATLDLANGFWSIPISTSTAFTFRGKQYQYTRLP  
QGFKNSPVLFSAAVEELLQNINAVPYVDDIYLASDKLDVLWDSVVKLIQVEGF  
VVATARIGFEVKFLGFLI

>ERV-Spuma.29-Rbi

QYPVHKKFYNDLNIIISQKLTQGVLISPLLVPKPNGSTRMVIDYRVLNASSET  
VAAQTLNPASTIDNLPRPRWKATLDLANGFWSIPISTSTAFTFRGKQY-YTRLPQ  
GFKNSPVLFSAAVEELLQNINAVPYVDDIYLASDQLDVLWDSVVKLIQVEGFV  
VAKARIGFEVKFLGFLI

>ERV-Spuma.30-Rbi

QYPVHKKFYNDLNIIISQKLTQGVLISPLLVPKPNGSTRMVIDYRVLNASSET  
VAAQTLNPASTIDNLPRPRWKATLDLANGFWSIPISTSTAFTFRGKQY-YTRLPQ  
GFKNSPVLFSAAVEELLQNINAVPYVDDIYLASDQLDVLWDSVVKLIQVEGFV  
VAKARIGFEVKFLGFLI

>ERV-Spuma.2-Rbi

QYPVHKKFYNDLNIIISQKLTQGVLISPLLVPKPNGSTRMVIDYRVLNASSET  
VAAQTLNPASTIDNLPRPRWKATLDLANGFWSIPISTSTAFTFRGKQY-YTRLPQ  
GFKNSPVLFSAAVEELLQNINAVPYVDDIYLASDQLDVLWDSVVKLIQVEGFV  
VAKARIGFEVKFLGFLI

>ERV-Spuma.12-Rbi

QYPVHKKFYNDLNIIISQKLTQGVLISPLLVPKPNGSTRMVIDYRVLNASSET  
VAAQTLNPASTIDNLPRPRWKATLDLANGFWSIPISTSTAFTFRGKQY-YTRLPQ  
GFKNSPVLFSAAVEELLQNINAVPYVDDIYLASDKLDVLWDSVVKLIQVEGFV  
VAKARIGFEVKFLGFLI

>ERV-Spuma.25-Rbi

QYPVHKKFYNDLNIIISQKLTQGVLISPLLVPKPNGSTRMVIDYRVLNASSET  
VAAQTLNPASTIDNLPRPRWKATLDLANGFWSIPISTSTAFTFRGKQY-YTRLPQ

GFKNSPVLFSAAVEELLQNINAVPYVDDIYLASDKLDVLWDSVVKLIQVEGFV  
VAKARIGFEVKFLGFLI

>ERV-Spuma.27-Rbi

QYPVHKKFYNDLNIIISQKLTQGVLISPLLVPKPNGSTRMVIDYRVLNASSET  
VAAQTLNPASTIDNLPRPRWKATLDLANGFWSIPISTSTAFTFRGKQY-YTRLQPQ  
GFKNSPVLFSAAVEELLQNINAVPYVDDIYLASDKLDVLWDSVVKLIQVEGFV  
VAKARIGFEVKFLGFLI

>ERV-Spuma.66-Rbi

QYPVHKKFYNDLNIIISQKLTQGVLISPLLVPKPNGSICMVIDYRVLNASSET  
VAAQTLNPASTIDNLPRPRWKATLDLANGFWSIPISTSTAFTFRGKQYQYTRLP  
QGFKNSPVLFSAAVEELLQNINAVPYVDDIYLASDKLDVLWDSVVKLIQVEGF  
VAKARIGFEVKFLGFLI

>ERV-Spuma.54-Rbi

QYPVHKKFWNDLNIIISQKLTQGVLISPLLVPKPNGSTRMVIDYRVLNASSET  
VAAQTLNPASTIDNLPRSWWKATLDLANGFWSIPISTSTAFTFRGKQYQYTRLP  
QGFKNSPVLFSAAVEELLQNINAVPYVDDIYLASDKLDVLWDSVVKLIQVEGF  
VAKARIGFEVKFLGFLI

>ERV-Spuma.61-Rbi

QYPVHKKFWNDLNIIISQKLTQGVLISPLLPKPKPNGSTRMVIDYRVLNASSET  
VAAQTLNPASTIDNLPRPR-KATLDLANGFWSIPISSSTAFTFRGKQYQYTRLPQ  
GFKNSPVLFSAAVEELLQNINAVPYVDDIYLASDKLDVLWNSVVKLIQVEGFV  
IAKARIGFGVKFLGFLI

>ERV-Spuma.62-Rbi

QYPVHKKFWNDLNIIISQKLTQGVLISPLLPKPKPNGSTCMVIDYRVLNASSET  
VAAQTLNPASTIDNLPRPR-KATLDLANGFWSIPISSSTAFTFRGKQYQYTRLPQ  
GFKNSPVLFSAAVEELLQNINAVPYADDIYLASDKLDVLWNSVVKLIQVEGFV  
IAKARIGFGVKFLGFLI

>ERV-Spuma.51-Rbi

QCPVHKKFWDDLNIISQKVTQGVLISPLLVPKPKPNGSTRMVIDYRVLNASSET  
VAAQTLNPASTIDNLPRPRWKATLDLANGFWSIPISSSTAFTFRGKQYQYTRLP  
QGFKNSPVLFSAAVEELLQNINAIPYVDDIYLASDKLDVLRNSVVKLIQVEGF  
VIAKARIGFEVVFLGFLI

>exCFVrbi.6

-----  
-----ITAIPYVDVIYLASDKLDVLWNSVVKLIQVEGFVAKARIG  
FEVKFLGFLI

>ERV-Spuma.33-Rbi



QYLVH-TFWNDLNIIIFQKLTQGV LISPLLPV PKPNGSTRMVIDYRVLNASSETV  
AAQTLNPASTIDNLP RPRWKATLD LANGF-SIPISSSTAFTFWGKQYQYTRL PQ  
GFKNSPVLFSAAVEELLQNITAIPYVDVIYL ASDKLDVLWNSVVKLIHVEGFVI  
AKARISFEVKFLGFLI

>ERV-Spuma.18-Rbi

QYPVHKKFWNDLNIIISQKLTQGV LISPF LPV PKPNGSTCLVIDYWVLNASSET  
VAAQTLNPASTIDNLP RPRWKATLD LANGFWSIPISSSTAFTFRGNQYQYTRL PQ  
QG---SPVLFSAAVEELLQNINAIPYVDDIYL ASDKLDVLWNSVVKLIQVEGFVI  
AKARIGFEVKFLGFLI

>ERV-Spuma.28-Rbi

QYPVHKKFWDDLNIISQQLTQGV LISPLLPV PKTNGSTRMVIDYWVLNASSE  
TVAAQTLNPASTIDNLP RPRWKATLDLTNGFWSIPISSSTAFTFRGKQYQYTRL  
PQGFKNSPVLFSAAVEELLQNINAIPYVDEIYL ASDKLDVLWNSVVKLIQVEGF  
VIAKARIGFEVS--GIFN

>AciFLERV-1

QYPLNPGAVKEMDLIVRELLTLGVIRSPIQAVKKPEGGWRPVINFKALNRRTV  
ANRASLINPQGTLKTLKLPFKSCIDLANGFFSLRLTRGTAFTHKGRSYVWER  
LPQGYKNSPNVFQAAMVMDVLDGLGATYIDDVFIADDTEEQHLDR LQKIVETA  
GLKLLKCCQFGRKVDYLG FQV

>AliFLERV

QYPLHPEAVAEMDKIVKELHALGIIRSPIQAVKKPEGGWRPVINFKALNRRTVA  
NRASLINPQGALKTLRVKKYKSCIDLANGFFSLRLARETAFTHKGKSYVWQR  
LPQGYRNSPNVFQSAVLEILEDVGASVYIDDVFIADDTEEEHLKRLEEVV KSA  
GLKLAKCQFGQFVN YLGFQV

>PlatyfishEFV

QYPLNPGAVEEMDKIVKELGALEIIRSPIQAVKKPEGGWRPVINFKALNRRTIA  
NRASLINPQGALKTLRVKKFKSCIDLANGFFSLRLARQTAFTHKGKSYVWQR  
LPQGYKNSPNVFQSAVMEVLGDVGATVYIDDVFIADDTEEEHLERLRKVVET  
AGLKLKCCQFGQFVN YLGFQV

>PfoFLERV-2

QYPLNPGAVEEMDKIVKELGSLGIIRSPIQAVKKPEGGWRPVINFKALNRRTIV  
NRASLINPQGTLKTLRVKKFKSCIDLANGFFSLRLARQTAFTHKGKSYVWQRL  
PQGYKNSPNVFQSAVMEVLGDVGATVYIDDVFIADDTEEEHLERLQKVIETAG  
LKLKCCQFGQFVN YLGFQV

>PfoFLERV-1

QYPLNPEAVEEMDKIVRELSALGIIRSPIQAVKKPEGGWRPVINFKALNRRTMA  
NRASLINPQGALKTLRVKKFKSCIDLANGFFSLRLARQTAFTHKGKSYVWQR

LPQGYRNSPNVFQSAVMEVLGDVGATVYIDDVFIADDTEEEHLERLQTVIKTA  
GLKLKCCQFGQFVNYLGFQV

>LcrFLERV

QYPLNPGAVEEMDKIVTELSALDIIRSPIQAVKKPEGGWRPVINFKALNRRTVA  
NRASLINPQGALKTLQVKRFKSCIDLANGFFSLRLAKQTAFTHKGKAYVWQR  
LPQGYKNSPNVFQAAVMDVLKDLGVTIYIDDVFLADDTEEEHLQRLRQVVET  
AGLKLKCCQFGQFVNYLGFQV

>LcaFLERV

QYPLNPGAVEEMDTIVKELSALGIIRSPIQAVKKPEGGWRPVINFKALNRRTVA  
NRASLINPQGTLLKTLQVKRFKSCIDLANGFFSLSLARQTAFTHKGKFYVWQRL  
PRGYKNSPNVFQSAVMEVLDGLGATIYIDDVFIADDTEE-----  
-----

>PreFLERV

QYPLNPGAVGEMDKIVKDLGSLGIIRSPIQAVKKPEGGWRPVINFKALNRRTV  
ANRASLINPQGTLLKTLRVKKFKSCIYLANGFFSLRLARQTAFTHKGKSYVWQ  
RLPQG-KNSPNVFQSAVMEVLGDVGATVYIDDVFIADD-EEHVLRLR--VETA  
GLKLKCCQFGQFVNYLGFQV

>JSpaFLERV

QYPLNPGAVEEMDLIVRELSALGIIRSPIQAVKKPEGGWRPVINFKALNRRTVA  
NKASLINTQGTLLKTLQVKKYKSCIDLANGFISLRLARVTAFTHKGRAYVWNR  
LPQGYKNSPNVFQSAVMDILEGLGATIYIDDVFIAEDTEEEHLKLRQVVETA  
GLKLKCCQFGQFVNYLGFQV

>OniFLERV

QYPLNPGAVEEMDMIVKELSRLLGIIRSPIQAVKKPEGGWRPVINFKALN---VAN  
RASLINPQGALKTLQVKKFKSCLDLANGFFSLRLAKQTAFTHKGKAYVWQRL  
PQGYKNSPNVFQSAVMEILAALEVTYIDDVFIADDTEDEHLDKLMVVEIA  
GLKLKCCQLGQFVKYLGQV

>GmoFLERV-1

Q-----ILRSPIQAVKKPDGSWRPVIFKALNRRTVANKASLINPQG  
TLKTLQVKKFKTCIDLANGFFSLPLARQTAFTHKGKAYVWQRLPQGYKNSPN  
VFQSAVMEVLRDLVVTIYIDDVFIADDTEGEHLQRLDEIISAGLKLKCCQFG  
KFVTYLGQV

>JXFheFLERV

QYPLNPGAVEEMDKIVKELKALEIIRSSIRAVKKPDGGWRPVIFKALNRRTVA  
NRASLINPQGALKTLRVKTFKSCIDLANGFFSLRLAKQTAFTHKGKCYVW-KL  
PQGY-NSSDVFQSAVMEVLGDLGATVYIDDFITDDTEEEHLERLQKVIESAGL  
KLKCC-FGQFVNYLGFQV

>CseFLERV

QYPLNPGAVQEMDMIVQ---ALGIIRSPIQAVKKPEGGW-PVINFKALNRRTVAS  
RASLINPQGALKTLKVKKY-SCIDLAN-FFSLRLTRQTAFTHKGKAYVWQRLPQ  
GYKNSSNVFQSVVTDVLDGLDVTAHIDDVFIADDT-EEHLEKLLKQVIQTTGLK  
LKKCQLGRFVDYLGfQV

>SruFLERV

ERRLNPRAVAEIDITVKELEALGIIRSPILAKKNAEGGWKFVIDFSALNEQTIPT  
RASLISSQGTLLKTLQVGKYKSCINLANGFFSLGLSEDTAFKRKGKAYVWQRLP  
LGYKNSPKVFQSAVMDILGDLEVTIRTGNVFIADDTEEKHLDKLRKVIESAGL  
KLKKCQFGQFVNYVGFQV

>SniFLERV

ERRLNPGAVAEIDITVKELKALGIIRSPIKVVENTEGGWMLVINFRALNQLTIAT  
RASLISPOGTLLKTLQVGKYMSCIDLANGFFSLRLSEDTAFKYKKGKAYVWQRLP  
LGYKNSPKVFQSAVMDILGDLEVTIYAGNVFIADDTEEKHLDKLRKVIESAGL  
KLKKCQFGQFVKYLGfQV

>GmoFLERV-2

QYPIDGKAIIEIGETIRELEALGVLELPIQAVAKPDGTYRLVCNLVELNKRSARD  
SRSLINPNRTTKTMPNLKYKTCLDLANGFWSIPLEKFTSFTFKGKSYCWTRLP  
QGYHNSPNAFQTVVEDILEGEPVVIYIDDIYITTDTEEEHLEVLERVILTGLKI  
GKFEIGQYVKYLGfQI

>DrFV-1

QYPINRNALPEIKITIEELKRKGIKSPIQAVAKPDGGWRLVTNYKALNKQTVPD  
TRYLINARDATGAAPEGRLLSKIDLANGFWSVPLKPETAFTFENKQYVYNVLP  
QGFKNSPNAFQAIMMEILKGLPVVVYIDDILIVTNDEEEHLKILDETLSTEGFR  
LKKMEIAKDVEFLGFQI

>PprFLERV-1

QYPINKKAPEIEETIKELGQLGVIKSPLQAVPKSDNSFRLVTNFKSLNKVSEPD  
TRYLINAKDVTNGLPKGKILTKIDLANGFWTVPLTENTAFTFKTKSYCYTRLP  
QGYMNSPNAFQSIVVSLMEGLPVTVYIDDLIVNDDPDEHLKIVDEVLTIVGF  
KPKKIEIGKGVDFLGFAT

>PprFLERV-2

QYKINSRAEKEIGETIKELTDQGIIRAPIQAVEKGDQTFRLVTNFKALNRVTVPD  
TRYLVGA-----LDEIRWLSKIDLANGFWSVPLAKETAFTFQGDQYVYTRLPQG  
YKNSPNVFNQSMMIETLAGIPVTLYIDDILVATETEAHEMKLLEQTLDTAGLKP  
KMEIGKHVDFLGF-L

>CcaFLERV

QYKINSAVNDIRETIKELTEQGIIRAPLQAVPKADGSWRLVTNFKALNKVTVP  
DTRYLINCETCADIGRDRNWLSKIDLANGYWSIPLAEETCFTFDGDQYEYRFL  
PQGYRNSANAFQSSMLKILAGLPVPV-IDDILLAMSEDEHLELLDRTLGAAGL  
KPKKMEIGKHVDFLGFKL

>AfiFLERV

QYPIKPE-----VKKELDELEHIALPVMGVKPDGTHRLVHNLIELNKRSFSDAR  
HLINPSRTMRTLPOKLYKTSLDLSNGFWSIPIDPQTCFTWGVESYCWRLRPMG  
YKNAPNVFQTAVVKTLEDLPVEVSIDDVYFTHDDPEEHLQCLEEV LRAAGFKI  
KKCEIARHLAYLGFKI

>NfuFLERV

QYPIR-DGRDEIRCTLAELKEKGIIEPIQAVPKPDGTYRLVHNLKVLNRLTPHD  
VRKTFDPYMLRTPMIKKYKTCIDLANGFWSVPLAQETGFTFEGKHFQWCVL  
PQGFVNVPNLFQGIVQSYLEDLPVVQYIDDLFFTHDCESEHLKTLDEVVTTAG  
FKLKKSQLGRTVTFLGFEV

>PmaFLERV

QYPLNPDAEEELGRTIEELLKLGVIAMPIQAVPKKDGTFRPVHNLKELNRITQK  
DVRQNLNPRKSLEFLPAKTYKSVIDLSNGFWSCKLEHYTCFQHKGKGYRWLS  
LPQGYVNSPVVFQEQMEKIMEGLDVTVYVDDIYWTTDSQEEHFYMLDEILK  
KAGMKIKKCQIGVSVKYLGFIT

>AciFLERV-2

QYPLRKEAEEEEIMLTIKELEAQQILVTPIQAVPKPKDQTYRLVHNLKALNDVTVK  
DERVIINPQKAVRETELGEFITTIDLANGFWSIPLTESTAFQIKGTAFRWKVLPQ  
GLCLSPNIFQEIVEKTLEGLKCTVYIDDILISHNDKEEHIECVKEVAKTAGFKIK  
KLVIASQATYLNFDI

>EluFLERV

QYPIAKEAL-ELNITMTVLLAQGILESPIQAVKKGDGTYRVVTDYKALNRVTM  
NHEGAYIDPSAAVK-IPIKKYKSCLDISNGFN SIPLAVETCFTWRGKSLQYTRLP  
QGYTNSPNVFAVMKDILEGLDCEIYIDDMYIT--DEEEHLNKIEEVVNAAGLK  
IKKTQLGRHIQFLGFKT

>TorFLERV

QHPLPPECIEQLSETIEELEKLGVITTPIMGVKEPDETWRLVHSLIALNTRSCSD  
TRSMINP--TVRTLENKKWKTTLDLANGFCPFQCV-QTAFTWKRQRYGWRGL  
QGLSSAPNVFQSVVEDILEELPVKIYIDGVYFTNDSEEHLDLL-RVIITAGFKIK  
KCEIAKHLKFLGFDI

>CmiFLERV-1

QYKIRREDKETIGKIINNLMEQGVKSPIFLKKKPDGSWRLLLDCKALNECTNP  
KQGQSISSHGSIEKLTREKYHTTLNIANGFWSIPIVEKTAFTYQGQQYQWTRLP

EGWCNSTVIFNEAIRRVLDDNPITRFGGVIHFSNDNAESHKLLKQILEDHGLKI  
RKSQIGRYVDFLGHQI

>HreFLERV

E-----LIEQLEQGILVTCIMPVYKLDGSIRLVLEYMNLNLHISKVKAQNK  
HLHTTFDDLPSGRYKTMLDLANGFFSYPLDSSTSFTWLGQKF--FRLPQRYCNS  
PAVFTARIIDILKDLD--CYPFDPYLSHDNLYEHLVLT--ISAHGYKIRKSANIAHSV  
VFL---L

>SnRV

QYPVPDASHASIKETVEALLEQGVLSAIWPVGKPDGSWRLTIDYRPLNSAVS  
P---YPTVASTLFAKLEKKQVYSSLDISNGFWSIRLEEEFAFTFDTQQYTWTRLP  
QGFHASPGIFHQALYNGLASCKLLQYVDDILLMSEDRDHHLRSLAILLQKLG  
KIKKSHFCKDVQYLG VNV

>FeLV

QYPMPEAYQGIKPHIRMLDQGILKTPLL PVKKPGEDYRPVQDLREVNKR  
EI---HPTVPNPLLSTLPPSPWYTVLDLKDAFFCLRLHSEFAFEWRSGQLTWTR  
PQGFKNSPTLFDEALHSDLADVLLQYVDDLLAAATRTECLEGTKALLEGK  
GYRAKKAQICLQVTYLGYSL

>F-MuLV

QYPMSEQEARLGIKPHIQRLLDQGILVTPLL PVKKPGNDYRPVQDLREVNKR  
I---HPTVPNPLLSSGLPPSQWYTVLDLKDAFFCLRLHPTFAFEWRSGQLTWTR  
PQGFKNSPTLFDEALHRDLADVLLQYVDDLLAAATSELDCCQGGTRALLQGLG  
YRAKKAQICQKVYLG YLL

>MDEV

QYPMSEAKEGIRPHIRLLDQGILVTPLL PVKPGNDYRPVQDLREVNKRVL  
I---HPTVPNPLLSSLPPETWYTVLDLKDAFFCLRLHPKFAFEWRTGQLTWTRLP  
PQGFKNSPTLFDEALHRDLAPFTLLQYVDDLLIAASKELCQGGTERLLTGLGY  
RVKKAQICQTVIYLG YTL

>PERV-A

QYPLSKEAREGIRPHVQRLIQQGILVTPLL PVKPGNDYRPVQDLREVNKR  
VQI---HPTVPNPLLALPPQSWYTVLDLKDAFFCLRLHPTFAFEWRTGQLTWTRLP  
PQGFKNSPTIFDEALHRDLANFTLLQYVDDLLLAGATKQDCLEGTKALLSLG  
YRAKKAQICRRVTYLG YSL

>RfRV

QYPMSEARKGIAPHINRLLLEAGILKTPLL PVKKPGKDYRPVQDLREVNKR  
VEI---HPTVPNPLLSHLPPSVWYTTLDLKDAFFSIALAPSFAFEWNPQGTWTRLP  
PQGFKNSPTLFNEALNQLDLSFTLLQYVDDLLAAPSEAECRQATGDLLQGLG  
YRAKKAQICRQVTYLG YKL

>WDSV

QYPLPKDKTEGLRPLISSLENQGILITPIFPIKKAGDEYRMIHDLRAINNIVAL---  
TAVVASPVLNLAPSHWFTVIDLSNAFFSVPIHKDFAFTFEGHQYTWTVLPQGF  
IHSPTLFSQALYQSLHKIEICIYMDDVLIASKDRDTNLKDTAVMLQAEGHKVK  
KLQLCQQVVYLGQLL

>WEHV-1

QYPLPKEKVEGLRPMIHSLLAQGVLTTPIFPIKKPGEEYRMIHDLRAINEIVAL--  
-TAVVASPVLANLSPDTCFTVIDLSNAFFSVPIHPDFAFTFEGRQYTWTVLPQGF  
IHSPTLFSQALFSSLSKIEICIYMDDVLIASRDEETNYKDTATMLHAEGHKVKK  
LQLCKSVVYLGQLI

>WEHV-2

QYPLPKEKVNGLRPMIESLLAQGVLATPIFPIQKPGQEYRMIHDLRAINEIVAL--  
-TAVVASPVLANLSPDKWFTVIDLSNAFFSVVHPDFAFTFEGRQYTWTVLPQG  
FIHSPTLFSQALFSSLSKIEVCIYMDDVLIASSTTKDINIKDTVTLLHAEGHKVKK  
LQLCKTVIYLGQLL

>SSSV

QYRLKYEQIEGIRPTVEGLLGADCIYTPILPVPKADKTYRMVQDFRAVNDVTT  
V---DLPVPDPSLSNLSPKQYFTVVDLANAFFSIPLHVDFAFYDNQQYTYSVLP  
QGYRCSPGIFNRVLKDHLKEIVLIQYVDDLLLAACSSDQCLAATKILLDAKGY  
KVSKVQTCRRVFLGREV

>ALV

QWPLPEGKLVALTQLVEKELQLGHIETPVFVIRKASGSYRLLHDLRAVNAKLV  
FGAVQQGAPV--LSALPRGWPLMVLDLKDCFFSIPLAEQFAFTLPARRFQWKVL  
PQGMTCSP TICQLIVGQVLEPLCMLHYMDDLLLAASSHDRLEAAGEE VISEAG  
FTIDKVQREPGVQYLG YKL

>LDV

QWPLTAQKLDVAVQNIQDLLKDGRISPIFVIQKKDSKFRMLHDLRAVNALIKW  
GALQPGTPW--PGAIPSEWPVIAMDISDCFFSIPLAERFAFTIPAKRYQWTVLPQ  
GMKNSPYICQQVVAEVIRPIVHHYMDLILAAAEERQTEVIFEAVKTHKGLKIA  
KTQRAPEVSYLGWRV

>MMTV

QWPLKQEKLQALQQLVTEQLQLGHLETPVFIKKS GKWRLQLDLRAVNAT  
MHMGALQPGLPS--PVAVPKGWEIIIIDLQDCFFNIKLHPEFAFSVPYQRFQWKV  
LPQGMKN SPTLCQKFVDKAILTVYIVHYMDDILLAHPSRSIVDEILTSMIQNHG  
LVVEKIQKYDNLKYL GTHI

>MPMV

QWPLTNDKLAAAQQLVQEQLAEGHITTPIFVIKKKSGKWRLQDLRAVNATM  
VMGALQPGLPS--PVAIPQGYLKIIIDLKDCFFSIPLHPSFAFSLPMQRFQWKVLP  
QGMANSPTLCQKYVATAIHKVYIIHYMDDILIAGKDGQQVLQCFDQLKQTAG  
LHIEKVQLQDPYTYLGFEL

>SRV-1

QWPLTSEKLAAAQQLVQEQLAEGHITTPIFVIKKKSGKWRLQDLRAVNATM  
VMGALQPGLPS--PVAIPQGYLKIIIDLKDCFFSIPLHPSFAFSLPMQRFQWKVLP  
QRMANSPTLCQKYVATAIHKVYIIHYMDDILIAGKDGQQVLQCFDQLKQTAG  
LHIEKIQLQDPYTYLGFEL

>BLV

QFPLNLERLQALQDLVHRSLEAGYISNPVFPVRKPNGTWRFVHDLRATNALT  
IPALSPGPPD--LTAIPHPHIIICLDLKDFAFFQIPVEDRFAFTLPHRRFAWRVLPQG  
FINSPALFERALQEPLRQVLLVSYMDDILIASPTEEQRSQCYQALAAARLGFQVE  
KTRQTPSPVFLGQMV

>HTLV-1

QFPLNPERLQALQHLVRKALEAGHIENPVFPVKKANGTWRFIHDLRATNSLTI  
LSSSSPGPPD--LSSLPTTAHLQTIDLKDAFFQIPLPKQFAFTVPGTRYAWRVLPQ  
GFKNSPTLFEMQLAHILQPITILQYMDDILLASPSHADLQLLSEATMAIHGLPV  
NKTQQTPGIKFLGQII

>STLV-2

QFPFKPERLQALTDLVSKALEASYIENPVFPVKKPNGKWRFIHDLRATNAITTL  
ASPSGPPD--LTSLSSTAPYLQTIDLTDAFFQIPLPKQFAFTIPGARYAWTVLPQGF  
KNSPTLFEQQLAAVLSPIIIQYMDDILLASPTQEELQQLSKMTLQVHGLPVEK  
TQQTPGIRFLGQVI

>BIV

QWPLTKEYQALKEIVKDLLAEGKISTPVFVIKKKGGRWRMLMDFRELNKIT  
VGQEFSTGLPY--PPGIKECEHLTAIDIKDAYFTIPLHEDTAFSVVIERFQWNVLP  
QGWVCSPAIYQTTTQKIIENIMLYQYMDDLIGSN-RDDHKQIVQEIRDGYGFK  
TEKVQE-ERVKWIGFEL

>EIAV

QWPLTKEKLEGAKEIVQRLISEGKISSPIFVIKKRSGKWRLQDLRELNKTVQ  
GTEISRGLPH--PGGLICKHMTVLDIGDAYFTIPLDPETAFTIPDKRYVWKCLP  
QGFVLSPIYQKTLQEILQPFQLYQYMDDLFMGSNSKKQHKELIIELRALKGF  
ETDKLQEVPPYSWLGYQL

>FIV

QWPLTNEKIEALTEIVERLEREGKVKTPVFAIKKSGKWRLMIDFRELNKLTE  
GAEVQLGLPH--PAGLQIKKQVTVLDIGDAYFTIPLDPDTAFTLPGRRFVWCSLP

QGWILSPLIYQSTLDNIIQPFDIYQYMDDIYIGSNSKKEHKEKVEELRKLWGF  
TDKQLQEPPYTWMGYEL

>HIV-1

QWPLTEEKIRALTDICTEMEKEGKISTPVFAIKKDKTKWRKLVDFRELNKRTQF  
WEVQLGIPH--PAGLKKKSVTVLGVGDAYFSVPLDPGTAFTIPGIRYQYNVLP  
QGWKGSFAIFQCSMTKILEPYHIIYQYMDDLYVGSDEIEQHRAKIEGLRDLWGF  
TTKKHQKEPPFLWMGYEL

>VMV

QWPLTQEKLEGLKEIVDRLEKEGKVGTPIFCIKKKSGKWRMLIDFRELNKQTE  
LAEAQLGLPH--PGGLQRKKHV TILDIGDAYFTIPLYEPTCFTMLCVRYWVVL  
PQGWLKSPAVYQFTMQKILRGWQFGIYMDDIYIGSDGLEEHRGIVNELASAY  
GFMLDKRQEGYPAKWLGFE

>CmiFLERV-2

K-----DRELERRVIELERRDIITSSLLPVHKADGSWQLVVDFRQLNTVTETAVG  
HSIHLSGDLDNLPKGRYKITLDLANRFWSVPLAKDTAFTFHG-QFYWNQMPQ  
GWKYSPAILNKCQQQTVIGLGVICYVDDIFWADDSPTHEHLKKLDGVLEALGF  
NIKKSQISRYVDFLGHTV

>XtrFLERV

-----VLKRWEMQGIIESPIYLDKCHNGKFTILFNHKLNECSEAIPAKEM  
NRNNSIANIALGKYYSFIKLHEGQWHIPLDKKTAFTFRRTQYVWNRLPQGFKN  
TSIILHKS LGHILDKLPVTTYVDVILISGDTEADCHKFTAELLEDHGFEIHRESLI  
ACTPVLEF-L



**Data set S3. The alignments used to build the phylogenetic trees for Pol r  
represented in Fig.3**

>BFVbta

QYHINPRAKADIQIVIDDLLRQGVLRNTPVYPVPKADGRWRMVLDYREVNK  
VTPLVATQNC HSASILNTLYRGPYKSTLDLANGFWAHPIKPEDYWITAFTWGG  
KTYCWTVLPQGFLNSPALFTADVVDILKDNVQVYVDDVYVSSATEQEHL DIL  
ETIFNSTAGYIVSLKKS LAK-EVEFLGFSISDLQPPTTLRQLQSILGLINFARNF  
LPNFAVAPLYWTMDHTTQLKTIIQAL TENLEERRPDVDLIMKVHISNTAGYIRF  
YNHIAYNALSTELKFTPTEKIMATIHKGLLKALDLSLGKEIHVYSAIASKWQT  
YFEDPRIKFYTDHTAAFEFAIRRAIGPVLIVTDSNYVAKSYNEHISKWKAIAEDI  
HVIHEPHLGRSALLKLQQKHIDASRIVLNCTVCAQTNSTNQIPHDTKVWYM  
DYIGGQHALVIVDAGTGFTWIYPTKAQTANATVKALHTLTA VPKVLHSDQGPA  
FTSSILADWAKDRGIQLEHSAPYHPQSSGKVER

>EFVeca

QYRINPKAKADIQIVIDDLLKQGV LKNTPVYPVPKPDGRWRMVLDYRAVNKV  
TPAIATQNC HSASLLNTLYRGYKTTLDLANGFWAHPIQESDQWITSFTWNGK  
SYVWTTLPQGFLNSPALFTADVVDLLKDNVEVYVDDVYFSNDTEEEHLKTM  
DLLFQQTAGYIVSLKKS LKLGQ-HVDFLGFQITDITPPNTLKQLQSILGLLNFARN  
FIPNYSITPLYWETKHTAILQKIIKELSENLEQRKPDVELIVKVHVSPTAGYIKFA  
NKIAYHN VVKTELKFTITEKVMTTIHKALLKAFDLAMGQPIWVYSPIHSKWQ  
TYFEDPRLIFYTDHTAAFEFALKQAKGPVLIVTDSDYVAKSYNQHVSKWKSIA  
DDIHVIHEPHLGKNTMYIKILNKIKDISKYIRTCTNCIITNTDNVQEKTGLKYY  
MDYIGGYHVLVIVDEGTGYTWLYPTKAQTANATVKALNHLTAIPKVLHSDQG  
SAFTSATLVAWAKDKGIQMEYSSPYHPQSSGKVER

>FFVfca

QYHINPKAKPDIQIVINDLLKQGV LINTPVYPVPKPNGRWRMVLDYRAVNKV  
TPLIAVQNQHSYGILGSLFKGRYKTTIDLSNGFWAHPIVPEDYWITAFTWQGGK  
QYCWTVLPQGFLNSPGLFTGDVVDLLQGNVEVYVDDVYISHDSEKEHLEYL  
DILFNKEAGYIISLKKSNIAN-SVDFLGFQITNITAPTTLKQLQSILGLLNFARNFI  
PDFTIAPLYWQIEHSTTLET LITKLAEYLQGRKGDKTLIMKVNASYTTGYIRYY  
NEISYVSIVKTELKFTLEKLLTTVHKGLLKALDLSMGQNIHVYSPIVSSWLSY  
LEDPRIRFYTDHTAAFEFALKKCLGNILVVTDSNYVAKAYNEHISKWKS VADD  
VVVTHEPHAGREAVLLKIQENKKDISSFLSTCNVCKMVNPLNLIVHPTKKFYM  
DYIGGVHVLVVVDAATGFTWLYPTKAQTSKATIKVLNHLTAIPKVLHSDQGS A  
FTSEEFAQWAKERNIQLEFSTPYHPQSSGKVER

>SFVcae

QYPINPKAKASIQT VINDLLKQGV LINTPVYPVPKPDGKWRMVLDYREVNKTI  
PLIAAQNQH SAGILSSIFRGKYKTTLDLSNGFWAHSITPESYWLTAFTWLGGQQY  
CWTRL PQGFLNSPALFTADVVDLLKENVQVYVDDIYISHDDPREHLEQLEKVF

SLNAGYVVSLKKSEIAQ-HVEFLGFNITNITPPRDLKQLQSILGLLNFARNFIPNF  
SVKPLYWTTDNSQQLQNIISMLAENLEERNPEVRLIMKVNTSPSAGYIRFYNEI  
MYLNYVKAEVKFTNTEKLLTTIHKGLIKALDLGGMQEILVYSPIVSTWMSYLE  
DPRIQFYTDHTAAVEFACKKAIGPVLIVTDSFYVAESVNKHVSKWKSIADDIII  
HEKHTGRDSTFLKVSSKRKDVVKVIRQCKQCLVTNAATLPERPVKKFFIDYIG  
GLHVLVVVDSMTGFVWLYPTKAPSTSATVKALNMLTAVPKVIHSDQGAFTS  
ATFADWAKNKGIQLEFSTPYHPQSSGKVER

>SFVmcy

QYPINPKAKPSIQIVIDDLLKQGVLTNTPVYVPKPDGKWRMVLDYREVNKTI  
PLIAAQNQHSAGILSSIYRGKYKTTLDLTNGFWAHPITPESYWLTAFTWQGKQ  
YCWTRLPPQGFLNSPALFTADVVDLLKENVQAYVDDIYISHDDPQEHLEQLEKI  
FSLNAGYVVSLKKSEIAQ-RVEFLGFNITNITPPKDLKQLQSILGLLNFARNFIPN  
YSVKPLYWTTEDNSNQLQHIISVLADNLEERNPETRLIIVNSSPSAGYIRYYNEI  
MYVNYIKAEAKFTQTEKLLTTMHKGLIKAMDLMGQEILVYSPIVSTWMTYL  
EDPRIQFYTDHTAAVEFACKKAIGPVLIVTDSFYVAESANKHVSKWKSIAEDIII  
MHEKHTGRDATFLKVSSKRKDVVKVIRQCKQCLVTNATNLPVKPLKKFYIDYI  
GGLHVLVVVDSMTGFVWLYPTKAPSTSATVKALNMLTAIPKVLHSDQGAFT  
SSTFADWAKEKGIQLEFSTPYHPQSSGKVER

>SFVpve

QYPINPKAKPSIQIVIDDLLKQGVLTNTPVYVPKPDGRWRMVLDYREVNKTI  
PLTAAQNTQHSAGILATIVRQKYKTTLDLANGFWAHPITPDSYWLTAFTWQGGK  
QYCWTRLPPQGFLNSPALFTADAVDLLKENVQVYVDDIYLSHDPHEHIQLE  
KVFQLQAGYVVSLKKSEIGQ-RVEFLGFNITNITPPKDLKQLQSILGLLNFARN  
FIPNFAVQTLTYWTTEDNTKQLNKVIEALASNLEERLPDQRLVIKVNTPSAGYVR  
YYNEIMYLNYVKAELKFSMLEKLLTTMHKALIKAMDLMGQEILVYSPIVST  
WMTYLEDPRIQFCTDHTAAVEFACKKAVGPVLIVTDSFYVAESANKHISKWKS  
IAEDITIQHEKHTGREATLLKIANLRKDVVKQLGRCKQCLITNASNKPDRPQK  
KFFIDYIGGLYVLVVDGMTGFTWLYPTKAPSTSATVKSLNVLTAIPKVIHSDQ  
GAFTSSTFAEWAKERGIHLEFSTPYHPQSSGKVER

>SFVggo

QYPINPKARSSIQVVIDDLLKQGVLTNTPVYPIPKPDGRWGMVLDYREVNKTI  
PLIAAQNQHSAGILATIVRKKYKTTLVLANGFWAHPITPESYWLTAFIWQGGKQ  
YCWTRLPPQGFLNSPALFTADVVDLLKENVQAYVDDIYLSHDDPQEHLDQLEK  
VFQLQAGYVVSLKKSEVAQ-KVEFLGFNITDITPPKDLKQLQSILGLLNFARNFI  
LNFAVKPLYWSNENTVQLQTIKALADNLEERIPEKRLLIIVNTPSAGYVRY  
NEIMYLNYVKAELKFTLLEKLLTTMHKALIKAMDLMGQEILVYSPVVSTW  
MTYLEDPRIQFYTDHTAAVEFACKKAIGPVLIIITDSFYVAESTNKHVSKWKSIA  
EDITIQHERHTGREATLLKIANLRKDVVRQLGRCQQCLVTNAFNQPTRPLKKF  
FIDYIGGLHVLVVVDSMTGFTWLYPTKAPTNTATVKALNVLTAIPKVIHSDQ  
GAFTSSTFADWAKERGIQLEFSTPYHPQSSGKVER

>SFVppy

QYPINPKAKESIQIVINDLLKQGVLPVYVVPKPDGRWRMVLVDYREVNKTI  
PLIAAQNHQSAGILASIYRGTYKTTLDLANGFWAHPITPNSYWLTAFWQGKQ  
HCWTRLPPQGFLNSPALFTADVVDLMKHNQVYVDDLYLSDDPQEHLQVLQ  
QVLHHDAGYVVSLLKSAIAQ-KVEFLGFNITNISPPQNLKQLQSILGLMNFARN  
FIPNYAVKPFYWNDELTSQLQELITLLADNLEERKPTTRLIIKVNSSSHAGYIRY  
YNEILYINYVKAEEKFSMLEKLLTTLHKALIKAVDLAMGTEIMVYSPIVSTWM  
TYLEDPRITFYTDHTAAVEFACKQAIGPVLITDSFYVAESANKHVSKWKSIA  
GITIKHEKHS GREATLLKLSNTRKDVVKVIGQCQCCLVTNPSNLPERPTKKFFI  
DYIGGLHVLVVVDAMTGFVWLYPTKAPSANATVKALNMLTAVPKVIHSDQG  
AAFTSSTFADWAKEKGIHLEYSTPYHPQSSGKVER

>SFVaxx

QYHINPKAKPSIQIVINDLLKQGVLRNTPVYVVPKPDGKWRMVLVDYRAVNKTI  
PLIAAQNHSLGILTNLIRHKYKSTIDLSNGFWAHPITEDSQWITAFWEGKQH  
VWTRLPPQGFLNSPALFTADVVDILKEGVSVYVDDIYISSPTMEEHFQVLDSIFR  
LETGYIVSLKKSALAR-YVNFLGFVISEITPPTTLKQLQSILGFLNFARNFVFNFS  
VQPLYWTAEHTLRLNELISALAGNLEQRRGDSPLVVKVNASDKTGYIRYNDI  
AYASHVTAELKFTPLEKLLVTMHRALLK GIDLALGQPIKVYSPIASTWLSYLED  
PRITFYTDHTSAVEFACKKALGPVLIVTDSYVARSANKHISKWKNISDNITIV  
HEPHTGREATLLKLTTRKDIITVLRQCKPCLQTDSTNLQPRPVKKFFIDYIGG  
SYVLVIVDARTGFTWLYPTKAPSTNATINSLNLLLAIPKVLHSDQGS AFTSATF  
AEWAKDRSIQLEFSTPYHPQSSGMVER

>SFVssc

QYHINPKAKPSIQIVINDLLKQGVLKNTPIYVVPKTEGKWRMVLVDYRAVNKTI  
PLIAAQNHQSAGILTNLVRQKYKSTIDLSNGFWAHPIDQDSQWITAFWEGKQ  
YVWTRLPPQGFLNSPALFTADVVDLLKENVNVYVDDIYVSTETINQHFQVLDKI  
FQLQAGYVVSLLKSNLCR-YVTFLGFTISNISPPNSLKQLQSILGLLNFARNFIP  
NFSIKPLYWEPKHSQALNNLIIALADNLEQRNGEVPLVIKINASNTTGYIRFYN  
KIAYASHVHTEQKFTPVEKLLTMMHKAIK GIDLAIGQPIEYSPIVSSWLSYIED  
PRFLFYTDHTAAVEFACKKAVGPVLIVTDSYVARSVNNHISKWKSISENITIV  
HEPHTGREATLLRLQNQRKDVSHCLRTCMPCLQTNSTNLQIRPSKKYYIDYIG  
GSYVLVVVDSATGFCWLYPTKAPSTRATVKSLNFLAVPKILHSDQGS AFTSS  
DFANWAKEKEITLSTPYHPQSSGKVER

>SFVocr

QYHVNPAAARPDIQIVIDDLLKQGVLKNTPIYVVPKPDGKWRMVLVDYRAVNK  
TVPAIGAQNCHAPGILSSLYRAKFKTTLDLSNGFWSHPITPESYWLTAFWQGS  
QYVWTRLPPQGFLNSPALFTADVVDLCKHNVSAYVDDIYVSNDAEEHLRTLE  
QLFRMSAGYIVSLKSKIGV-SVDFLGFETNIQPPSSLKQLQSILGFLNFTRNFV  
PNYSVKPLYWTLENTEQLNQVISALADNLSERKTGVPLVVKSNCSPTAGYIRF  
YNQIQYVNYIKTELKFTPLEKQLTVLHKAILKGLDLAGGEDIHFYTPIASTWIT  
YLEDPRFHFYTDHTAACEFAIKKALGPVLIVSDSVYLKSFNEHISKWKTIAAD  
IFLLHVPHMGREAVLAKIQNVKKDVKHVLTICSQCQVNSFNLIARHVHKIY

MDYIGGLYVLVLVDSCTGFTWLYPTKAPSANATVKALTHLTAVPKVLHSDQGS  
AFTSSTLVDWAKERGIRLEYSTPYHPQSSGKVER

>ERV-Spuma-Cma

QFKINPQAIPSIQIVINYLLKQGIPRNTPVYVPKGGKWRVLVDYRAVNKVT  
AIAAQSCHSTGILMQLTRKKYKTTLDLRWVFGPILSPK----IAFTWCGKQHV  
WTQLPQGFLNSPALFSADVVDLLKEDVSVYVNDIYFLHDTEKEHLKTTRHLH  
NIERGOIHSLKKSEIGK-RVNFLGFAITNLQPPKTLKQLQSILGFLNFAHPFISNF  
AVKSLHW--ENQDALDDLITAIAALLTERDPTKPLAVKLHVSPEGLYVRLYNMF  
QYTSIIKAEKRFTLTKLLTVMQYALIKSFDIAQGQMIHVYSPLRCKWMSHIEN  
PQIKFYLYHLAALEFALQQIDTPRLIITDSYVSKRYNSHISLWKSISEWVHVTH  
EPHFGRDATLAVLKKI-QTVQQVLQYCSKCVTYNSANRRTIPESILFIDYIGGDY  
VLVIIDGATSFVWLYPTTGPTAQATVRALTDCAIPKKIHSDQGAFTADISKEF  
AKKYNIQWEYSTPYHPQNSGKVER

>ERV-Spuma\_Cbo

QFKINPQAIISSIQIVINYLLKQGVPRNTPVYVPKGGKWRVLVDYRAVNKVT  
PAIAAQNCHSTGILMQLTRKKYKTTLDLRWVFGPILSPKIANGQPLLGVAKQ  
HVWTQLPQGFLNSPALFSADVVDLLKEDVSVYVNDIYFSDTEKEHLKTTRH  
LNIERGOIHSLKKSEIGK-RVNFLGFAITNLQPPKTLKQLQSILGFLNFAHPFIS  
NFAVKSILHW--ENQDALDDLITAIAALLTERDPTKPLAVKLHVSPEGLYVRLYN  
MFQYTSIIKAEKRFTLTKLLTVMQYALIKSFDIAQGQMIHVYSPLRCKWMSHI  
ENPQIKFYLYHQAALFALQQIQTPRLIITDSYVSKDYNHISLWKSISEWVH  
VTHEPHFGRDATLAVLKNI-QTVQQVLQYCSKCVTYNSANRRTIPESILFIDYIG  
GDYVLVIIDGASSFVWLYPTTGPTAQATVRAVTDCAIPKKIHSDQGAFTADIS  
KEFAKKYNVQWEYSTPYHPQNSGKVER

>ERV-Spuma-Spu

QYPINKAAINDIQKVINDLIAQGALINTPVYVPKPNGKWHMVLVDYRALNRVS  
PSFNVQNLHVWH-----ARKFGKAQIQNYTGFLGSSYREQDRYLTAFSWQGTQY  
CWTRLPPQGYLNSPALFSADVQLLKNVHVSYMDDIYFTNEDLDQHLATLKQI  
VTGEAGYIINLKKSQICR-SVKFLGFLTTLQPPKTLKELQSVLGLNVARILVP  
DYATKPLYWTLEAQQTLNLIITLAVELNTRNSTVSLEILVGATQKGGFASYFN  
YLQYISYVNAEQKFLPIERILCMCNLAILKGDLAQGQKMIVKTPIASQWMSH  
FENPQIEFYTDNTMAVHKAIEISDETVLICDTSFYIARGINEHAHRWQKLATLIT  
VMHVPHQGVNATVESLQRSRKQVQRHLAQCEPCLRTNPGPVNPKPLSKVYM  
DYIGGNHCLVIVDACTGFVWIYPTRDQSASTTVRTLTSFIGLPCILHSDKGGAF  
TSHQMQSFAKSFQIVLEYSTPYHPQSAGVVER

>CoeEFV

QYPINTKAIPSIQVVINELLEQGVLVNMAVLPVPKPDGTWRLVLVDYRALNKHS  
EPVRAQNQHSSGILANIERKAYKSSVDLANGFWSHPIREEDWPKMAFTWCGF  
QYLWTRLPPQGYLNSPALFSADVSLVGGQVYCYVDDIYLTHDTEEEHLKILDQ  
VLEIKAGYVINIKKSKLCR-KVDFLGFSLSAIKPPQTLRQLQSVMLLNFSRLF

VKGFSAPLYFTPQAHEALTKLLSAIAPNLTNRDNTRALVIRIVTSPRSVAAY  
YNVIQYVSYNQPEMKFSKIEKVCVMVNMALIKGRVLAHEQDIEIHTAIPALWC  
TLFSDQRLTFYSDASMLLDVAVKQATGPVLICTDSVYAQRGYTEYADKWKQL  
DQLVRVIHVPHLGGNNTGKTLRRLYTECKRYVANCPCLAVNVTPTPRRGA  
KIFLDFVGGTAILILVESLSSFTWLLPCRDQSASTTALTALSAFPIEPKCFHSDQG  
GGFTSQLFKKMCSENRIRVEYSTPHHPQSAGVVER

>SloEFV

QYQINQKAKLAMQTVINDLIKQGMLLNTSIYPIPKTNG-FRMVLNVRAVTNVI  
PLIAVKNQCSTEILTQMQRKYKTTLDLSNGFRAHPIRKESWIMAYTWEEKQ  
LLWTRLPLG--NSPALFTANIVDILKEPVEVYVNDIYF---NVTEHLITLKLVLKLR  
SGYMVSL-KSEIAK-EVTIVHFDITNILVSKTLKELQSIL-LLNIAHNVFTDFATKP  
LYLMEKEGMELQVII--MTFYLENRD-IQTLIIKLDSSPT--YI-MYNKIQYVNFIPA  
EIKFKPTEKLLIKMQKEIIGLELLQITQIHIYSPLASTWMT-FKNPQLIFHTDESS  
PFAAKKAMMKGPILVVTNSMHLAESFNEHINKWKVFANIIHVMVHEP-----  
----VRSLVANCEKQCQTNAFQISIHPSKKFYMNYYGHKHILVIVVAKMRYCWLF  
ATKTQANANA--KTLNFLSGTAKVLNSDQRSTFNSATLQQWTKNRSKDLVFSTP  
YYPQSCRNMGR

>ERV-Spuma-Smu

QYKINHAAPSIIQVIDDLVKQGIIMNTAVYPVPKPNGSWRLVLDYREVNKVTP  
VVSAQNTHSVSILHGLVRKRFKTTLDLANGFWSHPIDTDSYWITAFWQGKQ  
YVWTRLPQGFVNSPALFTADVVSLLSANIEVYVDDIYLSHDSEEEHIAVLTQVL  
DTKAGYIVSLKKSQIARNKVTFLGFDITHIKRPSLKQLRSIIIGLFNYAMLFIPN  
FNIAPLHWNMKEEKALQDLLTAVNDYLTQREPTQPLSVYVSISSEAAAYIRIYNS  
IVLLSYVITERKYLPLEKLLTAVTVAVLKSRDLAQQQNIYIYTSVASKWTLFED  
PQLNFYTDGSAALVFALKEALGPVLVVTDSAYLARSANEHIAKWKAISADIEI  
VHEPHLGRDNVLQALKKKRKTVSYVVGNCCKPCLLVNPNHQQKPFDLIYLD  
HIGPLYVLVCVDACTRFTWLYPVRATNSNTTLSCLNFLVGAPKILHSDGGPAFT  
AVKTQEWAHALGIKWEFSSPYHPQSSGVVER

>AciFLERV-1

QYPLNPGAVKEMDLIVRELLTLGVIRNSPIQAVKKPEGGWRPVINFKALNRRT  
VANRASLINPQGTLKTLKLPFKSCIDLANGFFSLRLTRGSQGKTAFTHKGRSY  
VWERLPQGYKNSPNVFQAAMVDVLDGGATIYIDDVFIADDTEEQHLDRLQKI  
VETAAGLKLNLKKCQFGR-KVDYLGQVVSQIEPPSSLNELQKVLGLCNYVRD  
YVPGYQAKPLYWTAADQSNLEELRQAIALRLEPRSPTAKLVAEISCEDEDSATV  
KVSNEVTLWSYASVEVKFPPEEKELAVLARYWSSLKDLAQQQGIRVITESQVR  
WEDILLDPDLEIFTDGSTAGLLELER--KRAKIITDSYYCAQALKEHEDLWKKIA  
EDLEVHVKHAGADPTRRELKQVREIRRVLKDCVECGRYNAGRRTIKSTVS  
ICMDVAGGKYLLVLVDSMSGYVAVKPVRQANGSSVVSMLDQCCGIPKELRTD  
NGTHFRNAKVDQWCQENGVMRVYSPPYTPQANGVVER

>AliFLERV

QYPLHPEAVAEMDKIVKELHALGIIRNSPIQAVKKPEGGWRPVINFKALNRRT  
VANRASLINPQGALKTLRVKKYKSCIDLANGFFSLRLARESQGKTAFTHKGKS  
YVWQRLPQGYRNSPNVQSAVLEILEDGASVYIDDVFIADDTEEEHLKRLLEV  
VKSAAGLKLNLAKCQFGQ-FVNYLGFQVTQIQPPRCENDLQKILGLCNYVRD  
HVPNYQAKPLYWTPKNQDDLKLEEI AVRLEPRNLTSRLVAEIFCENEDAMV  
KVSNDITLWSTTSVEKKYPQEEKELAVLAKYWGSLKDLAQQGQPIKVTTSQSV  
RWEDILLDPLEIFTDGSTAGLLELTR--KAARVVTDSYYCAQALKEHKELWE  
KIAEDLDVEHQKHAGLLPTRRGLVKQMKQIQVLRCTVCGKYNAGRRTIKS  
TISICMDVAGGKYLIVLVDSMSGFVVVRPVRKANGNSVVSMLDYCAGIPREL  
RTDNGTHFKNVQVNRWCEQHGVMRVYSPPYTPQANGVAEC

>PlatyfishEFV

QYPLNPGAVEEMDKIVKELGALEIIRNSPIQAVKKPEGGWRPVINFKALNRRTI  
ANRASLINPQGALKTLRVKKFKSCIDLANGFFSLRLARQSQGKTAFTHKGKSY  
VWQRLPQGYKNSPNVQSAVMEVLGDGATVYIDDVFIADDTEEEHLERLRKV  
VETKAGLKLNLKKCQFGQ-FVNYLGFQVTNIQPPQSENDLQKILGLCNYVRD  
HVPNYQAKPLYWTAANQQNLEELRRAIAVRLEPRSLSERLVAEISCENDDAMI  
KVSNEVTLWSYTSVEKKYPQEEKELAVLARYWGVLDLAQQGPVKVITQSQ  
VRWEDILLDPELEIYTDGSTAGLLELVR--KSARLVTDSSYYCAQALREHKDLW  
KKIAEEIDVEHQRHAGVRPTRKELEEQVKQVQRVLRDCEVCGQYNAGRRSIK  
STVSVCM DVASGKYLIVLVDSMSGFVTTKAARKANGNSVVGMLEQCSGIPK  
ELRTDNGTHFRNSQVDQWCQKYGVMRVYSPPYTPQANGVVER

>exCFVrbi.6

-----  
-----TAIPYVDVIYLASDKLDVLWNSVVKLIQVEEGFVVNF  
AKARIGFEEVKFLGFLIGVFPVKTSRQLQVIMGTLNFARKTVPSFASAPLYWT  
AVHSECLRALQEAVSAPLAHRKSSKDLVTLQVSDSHFLATISNHICYITHQTP  
ERKFNVVERTLTAVRYCLSKVSALAQGKIIHCYTGIPQQWRADQYRDDVQFFT  
DGSAAELIAFQKALRSVMVCSDESTYVVS GFNSHRAHWRLIFSQVLVLRHG  
SLHLNAATLCQHRSQAKKMVSDCLDCQRTNPKRTGHRPGQVVYMDHVGPR  
HILVVLDSFTGFVFLFAQKRITAVTVNRLAIVFGIFQLCTDGGPAFKNAEVET  
FCADHSVTHRFSYPHRPESNGMVER

>ERV-Spuma-Rbi

QYPVHKKFYNDLNIISQKLTQGVLFN SPLLPVKPNGSTRMVIDYRVLNASSE  
TVAAQTLNPASTIDNLP RPWKATL DLANGFWSIPIS--TSPVTAFTFRGKQYQY  
TRLPQGFKNSPVLFSAAVEELLQRNAVYPYVDDIYLASDKLDVLWDSVVKLIQV  
EEGFVVNFAKARIGFEEVKFLGFLIGVFPVKTSRQLQVIMGTLNFARKTVPSF  
ASAPLYWTAVHSECLRALQEAVSAPLAHRKSSKDLVTLQVSDSHFLATISNHI  
CYITHQPERKFNIVERTLTAVRYCLSKVSALAQGKIIHCYTGIPQQWRADQYR  
DDVQFFTDGSAAELIAFQKALRSVMVCSDESTYVVS GFNSHRAHWRLIFSQVL  
VLHVRHGSLHLNAATLCQHRSQAKKMVSDCLDCQRTNPKRTGHRPGQVVY

MDHVGPRHILVVLDSTGFVFLFAQKRITAIVTVNRLAIVFGIFQLCTDGGPAF  
KNAEVETFCADHSVTHRFSYPHRPESNGMVER

>ERV-Spuma.b-Ame

QYPTPLPAVPHIQKTITQLVDQGVIIYNTPLVLPVIKPDHTYRLVLDYRELNAHAR  
TDAVQNLHSSGLLNILRNKYKTVLDLGNNGFFAQPLAPESYKYTAFTHRGKH  
FQMTRLMQGYKNSPGIFSSRIQTLLADNCWQYVDDIYCTDDDLEEHLERVDQ  
IVRTSKGYIFNFKKSIAHREVTFLGFTLTDLQSPRSLKQLQAMLGLLNYGRTY  
VPNYAEKPLYWKSEHANILNHVYTLMTGPLQDRNPEKDLEVSLMPGKNAFA  
YTCNRIAYRSHIPEQKFALEERILAAVQIILQKERSIAAGKTIHIITPIAQQWM  
STRAAPDVQFYTDGSAGLLLALRQVVQPTLIVSDSDYVVRAFNTAKQLWQQ  
VWKLWVTHHTHFGINATTQLLQARRKQVKHYIANCTTCLQTTVDHTKKVP  
FECMFMHDHIGPKYLLIIVDSCTRYTWIYPQRNADCRTVIKDLRSLFAMVQTLY  
ADNGPAFTGKAVQEAVTSMGAKLSFSTPFHPEGNGVVER

>ERV-Spuma.a-Ame

QYPVKPQAVAHMQTIVDQLMDQGVIIHNSPVLVLPKPDGTYRFIVDFRILNAH  
CKTEAVQNQHSSGLLANLHRCKYKTNLDLGNNGYFTQPLSVESQKYTAFTFKG  
THFQFTRIMQGYKNSPSTFSSRIQSLLADNCWQYVDDIYITHENLSEHLQEVD  
RVIHTAKGYLINFKKSRIAHREVTFLGFTLSDIRPPTTLRQLQAILGLLNFRGSY  
VSNFAEKPLYWLPEHTXILHQVYSLMTGPLQDRNTDKDLEINLVVGDNAFTY  
TVCNLIAYKSHVTPELKFTPEEKILASVQMIIQKERPLAANRTIHINTPLAQQWS  
ASQHAPDVKYYS DGSA GLLLALRQADKPTLVVSDSDYIVRAYNTSRQLWKQ  
VWDLWVMTHTHFGVSATAQLLLDRRQQVKIYIANCDTCLQTTVDHSSKSPF  
EIQYMDHIGPKYILVIVDSCTRFTWMIPQKKADCKSVIQALRTVVAMTQTFHA  
DNGPAFSGRALKKALEAWGTEMHFSPFSPKSN GIVER

>PfoFLERV-2

QYPLNPGAVEEMDKIVKELGSLGIIRNSPIQAVKKPEGGWRPVINFKALNRRTI  
VNRASLINPQGTLKTLRVKKFKSCIDLANGFFSLRLARQSQGKTAFTHKGKSY  
VWQRLPQGYKNSPNVFQSAVMEVLGDGATVYIDDVFIADDTEEEHLERLQKV  
IETKAGLKLNLKCCQFGQ-FVNYLGFQVTNIQPPQSENELQKILGLCNYVRDH  
VPNYQAKPLYWTAAN-RDLEDLKKAI AVRLEPRSLSDRLVAEVSCEEDDAMIK  
VSNKVTLSYTSVEKKYPQEEKELAVLARYWSVLKDLAQQGPVKVITQSQV  
RWEDILLDPELEIYTDGSTAGLLELGKRIKSARLVTD SY YCAQALKEHRDLWK  
KIAEELEVEHQRHAGVRPTRKELEEH ELWVQC VLRDCEVCGKYNAGHRTIKS  
MISVCMDVAGEKYLLVLVDSMSGFVTVKA AKKANGSSVGMLEQVCSAPKE  
LRTDNGRHRFNAQVDQWCQKYGVMRVYSLPYTSQANGVVER

>PfoFLERV-1

QYPLNPEAVEEMDKIVRELSALGIIRNSPIQAVKKPEGGWRPVINFKALNRRTM  
ANRASLINPQGALKTLRVKKFKSCIDLANGFFSLRLARQSQGKTAFTHKGKSY  
VWQRLPQGYRNSPNVFQSAVMEVLGDGATVYIDDVFIADDTEEEHLERLQTV  
IKTDAGLKLNLKCCQFGQ-FVNYLGFQVTNIRPPKSENELQQILGLCNYVRDH

VPNYQARPLYWTAENQQDLEKLRRTIAVRLEPRSLTDKLVAKISCEDDNAMIQ  
VSNEVTLWSYTSVERKYPQEEKELAVLARYWSALKDLAQQQPVKVITQSQVR  
WEDILLDPELDIYTDGSTAGLLELVKRVKRARLVTDSSYYCAQALEEHTDLWK  
KIAEELKVEHQRHAGVRPTRVELVEQDLWIQRVLRGCEVCGQYNAGRRTIKS  
TVSICMDVAGERYLLVIVDSMSGFVIVKATRKANGSSVVGMLEQVCSSPKELR  
TDNGTHFRNSQVDQWCQRFGVMRVYSPPYTPQANGIVER

>PreFLERV

QYPLNPGAVGEMDKIVKDLGSLGIIRNSPIQAVKKPEGGWRPVINFKALNRRT  
VANRASLINPQGTLKTLRVKKFKSCIYLANGFFSLRLARQSQGKTAFTHKGKS  
YVWQRLPQG-KNSPNVFSASVMEVLGDGATVYIDDVFIADD-EEEHLVRLR--V  
ETKAGLKLNLKCCQFGQ-FVNYLGFQVTTFSPL----SLQKILGLCNYVRDHVPN  
YQARPLYWTAANQQDLEELRKIAIVRLEPRSLSERMVAEISCENDDAMIKVS  
EVTLWSYTSVEKKYPQEEKELAVLARYWSVLKDLAQQQPI-VITQSQVRWEDI  
LLDPELEIYTDGSTAG-LELAKRIKSARLVTDSSYYCAQALREHKDLWKKIAEEL  
QVEHQRHAGVRPTHKELKEHELW-QRVLRGCEVCGQYNAGRRTIKSTISICM  
DVAGEKYLLVLVDSMSGFVTVKAARKANDNSVVGMLEQVCSAPKELRTDNG  
THFRNAQVDQWCQKYGVMRVYSPPYTLQANGVVER

>LcrFLERV

QYPLNPGAVEEMDKIVTELSALDIIRNSPIQAVKKPEGGWRPVINFKALNRRTV  
ANRASLINPQGALKTLQVKRFKSCIDLANGFFSLRLAKQSQGKTAFTHKGKAY  
VWQRLPQGYKNSPNVFAAVMDVLKDGVTIYIDDVFLADDTTEEHLQRLRQ  
VVETEAGLKLNLKCCQFGQ-FVNYLGFQVAQVRPPTSENDLQKILGLCNYVR  
DHVPNYQAKPLYWTATDQQNLGRLKAVIAIRLEPRSLTTRLVAEVSCEDDDAV  
VKVKNEVTLWSYTSVEKKFPQEEKELAVLARYWGTMKDLAQQGQIKVITQS  
QVRWEDILLDPLEIYTDGSTAGLLELEKRVKTARIITDSYYCAQALKEHQDL  
WKKIAECLDVVHQKHVGTMPTRKELEKQQLWVRQVLKDCNVCGRYNAGR  
TIKSTVSVCMDDAAGEKYLLVLVDSMSGYVLVKAARRITGSSVVSMLDQVCSV  
PKELRTDNGTHFRNAQVDQWCQQNGVMRIYSPPYTPQANGVVER

>JSpaFLERV

QYPLNPGAVEEMDLIVRELSALGIIRNSPIQAVKKPEGGWRPVINFKALNRRTV  
ANKASLINTQGTLKTLQVKKYKSCIDLANGFISLRLARVSQGKTAFTHKGRAY  
VWNRLPQGYKNSPNVFSASVMDILEGGATIYIDDVFAEDTEEEHLKCLRQVV  
ETAAGLKLNLKCCQFGQ-FVNYLGFQVSQIQPPTTLNELQKILGLCNYVRDHV  
PGYQAKPLYWTATDQSHLEELKDAIALRLEPRSLDTRLVAETSCEEDDAVTV  
SNEVALWSYTTVERKYPPEEKELAVLARYWSALKDLAQQQGIRVITQSQVRW  
EDILLDPLEIYTDGS-RGLLELEKRVKRARIITDSYYCAQAMNEHRDLWKKIA  
EDLEVIHQRHVGTLSRKELEKQQLWIRQVLKDCEACGRYNAGRRTIKSTVS  
VCMDDVAGEKYLLVLVDSMSGYVIIKPVKANGNSVVSMLDQACSHPRELRTD  
NGTHFRNAKVDLWCQEQQGVRIYSPPYTPQANGVVER

>LcaFLERV



QYPLNPGAVEEMDTIVKELSALGIIRNSPIQAVKKPEGGWRPVINFKALNRRTV  
ANRASLINPQGTLKTLQVKRFKSCIDLANGFFSLSLARQFQGKTAFTHKGKFY  
VWQRLPRGYKNSPNVFQSAVMEVLDGGATIYIDDVFIADDTTE-----  
-----FNYVRDHVPNYQAKPLYWTATDQDNLEKQAI  
AVRLKPQSQTTRLVAEVSCEEEDAVVKVSNEVTLWSYTSVERKYPPPEEKELAV  
LAKY-GALKELAQQGGIKVITQSHVRWEDILLDPDLEIYTDGSTAGLLEMEKRI  
KRARKIT-SHYCAEALKEHQDLWKKIAEELDVVHQKHAGTLPTWKELEKQQI  
WIRKILKDCEVCGQYNAGRRTIKNTI---MDVAGEKYLLLLVDSRSGYVVIKPV  
RKANGSSVVSILEQICSNPKELRTDNGTHFRNAQVDQ-CQRNGVSRVYSPPYT  
PQANGVVER

>JXfheFLERV

QYPLNPGAVEEMDKIVKELKALEIIRNSSIRAVKKPDGGWRPVIFKALNRRTV  
ANRASLINPQGALKTLRVKTFKSCIDLANGFFSLRLAKQSQGKTAFTHKGKCY  
VW-KLPQGY-NSSDVFQSAVMEVLGDGATVYIDDFITDDTEEEHLERLQKVIE  
SAAGLKLNLKCC-FGQ-FVNYLGFQVSG-SGPRDLKDLQKILGLCNVVRDHIP  
NYQAKPLYWTALNQHDNLQKKAIAVRLPRSLTSRLVAEISCEDEDAMIKVS  
NE-----YTSVEKKYPQEEKELAVLAKYWSALKDLAQQQPLKVTTSRVMWED  
ILFDPDLEIYTDGSTAGLLELIKRVKRAKIITDSYYCAQALKEHHDLWKKIAED  
LQVEHQRHAGVLPTRKELEDQELWNRRLRDCVCGQYNTGRRTIKSTVSVC  
MDVAGEKYLLVLVD-MSGYVTVKAACKANGSSIVSMLEQVC-VPKELRTDNG  
THFRNSQVDQWCQRFQVVRVYSPPYTPQANRVLEH

>CseFLERV

QYPLNPGAVQEMDMIVQ---ALGIIRNSPIQAVKKPEGGW-PVINFKALNRRTVA  
SRASLINPQGALKTLKVKKY-SCIDLAN-FFSLRLTRQSQGKTAFTHKGKAYVW  
QRLPQGYKNSSNVFQSVVTDVLDGDVTAHIDDVFIADDT-EEHLEKQVIQT  
DTGLKLNKCCQLGR-FVDYLGQVSQITPPCSENDLI-----IMADHVPSYQAK  
PLYWIATDQKNLEELKNIIAIRLEPQSLTKLVAEISCDGDDAVVTVSNEVTLWS  
YITIERKYPPEEKELAFSAIK-LAQT-ITKMITQSQR--NILLDPDIEI--D  
GSTASLIELEKRRKRAKIVIN--YCAQALNEHKELWTKIAEDLEIVHQKHAGTL  
PTRQELDKLDLWIRKVLKDKMCGQYNAGRRIKSTVSSMDVAGKKYLQVI  
VDSISGFVVFQPPRKANANSVVMLENVCSHPKELFTDNGTHFRNAKVDWCW  
CQQNGITRVYSPPYTPQANGVVER

>DrFV-1

QYPINRNALPEIKITIEELKRKGIKNSPIQAVAKPDGGWRLVTNYKALNKQTVP  
DTRYLINARDATGAPEGRLLSKIDLANGFWSVPLKPESRARTAFTFENKQYV  
YNVLPQGFKNPNAFQAIMMEILKGPVVVYIDDILIVTNDEEHLKILDELST  
KEGFRNLNYKKMEIAK-DVEFLGFQITELRGKESLKQLQSMGLTNFVRDLIPG  
YAAKPLYWNEKLSEIKAKLIDEASGRLVRRDETTPLVVKIANTEDEELIIFNEQ  
VCFISSTANQRKLENMTDILATLAKSLITLCLALDQPIIVKAKGEGKWTVILN  
DTQFQFYTDLSKAFRKALEKALFKCFMVTDSYIYQAVEEQADDWKVIDETP  
TVLHQTHPTTKYLALYCHALKSEYYKIKVNCPCNRKAIDSRFSIKTDHEISMD

FAGKCYFLLITDNASEYTQIFPCKQATEEVVIESLQQFKGIPNRVRADGAFNLS  
GRKVEQFIKDSGAKLIKSVKYQPSSNGIAER

>PprFLERV-1

QYPINKKAIPEIEETIKELGQLGVIKNSPLQAVPKSDNSFRLVTNFKSLNKVSEP  
DTRYLINAKDVTNGLPKGKILTKIDLANGFWTVPLTENSMAKTAFTFKTKSYC  
YTRLPQGYMNSPNAFQSIVVSLMEGPVTVYIDDLLIVNDDPDEHLKIVDEVLT  
KVGFKPSYKKIEIGK-GVDFLGFATTDLRKNSPTKGLQSFMGHMNFIRDLP  
GYAAKPLYWNDELEKIRLEL----SGKIARREPDQKLVVCVENTEDEMELV  
LYNDIQFMSYPANQLKQEPASDILATIAKCLIPKTIAVDQQIIVESKTQLK  
WTKVLQDTQIIFFTDGSSAALRHMKATTVNAIIVTSDYVNKALTEQAVLW  
KEIVEKPRVLHQSHPSLSYMAKYCKATGLKYLKIRKCCPECRKVMTSRYA  
IKTDKEISIDFAGNCYFLVIVDNCNLFQIYPCKQATSSVVVESLKDWIKY  
PMRIRGDNASNLGTGREVEEYCDKIGVKLINSIKYQPASNGCAEN

>PprFLERV-2

QYKINSRAEKEIGETIKELTDQGIIRNAPIQAVEKGDQTFRLVTNFKALNRV  
TVPDTRYLVGA-----LDEIRWLSKIDLANGFWSVPLAKESQGKTAFTFQ  
GDQYVYTRLPQGYKNSPNVFQSMMIETLAGPVTLYIDDILVATETEAEHM  
KLLLEQTLDTAAGLKPSLKKMEIGK-HVDFLGF-LGKSGPPKSRKQLQSL  
LGTNLNFIRELIPKYSAKLLYWTNEMEIRVKLLE--SGELERRDEVVPLI  
VDVREAEQEVTLTVSNRIAF LTHTQSMLKYNGPERVLA AVTKRLLQLK  
AIAKEQPIEYSHAGEQWNLILGDNQLEWFTDGSTA ALEKAVELHREIV  
LTC DSEYVADGLNKHKEQWEKIAETVHCYHQVHPSYNIQME LRLRNL  
IYGEVKRECKICRKFMTAKGELPKEYEVSIDFAGNCYFLLAIDNHTKKK  
MIWPMRS AVEKNVVECLKEWIKWMVSLRADGAHNI SGKLVEDFCREN  
KIVLTKSIPYRPETNGIAER

>CcaFLERV

QYKINSAAVNDIRETIKELTEQGIIRNAPLQAVPKADGSWRLVTNFKALNK  
VTVPDTRYLINCETCADIGRDRNWLSKIDLANGYWSIPLAEESCKKTCFT  
FDGDQYEYRFLPQGYRNSANAFQSSMLKILAGPVPV-IDDILLAMSEDE  
HLELLDRTL GAAAGLKPSLKKMEIGK-HVDFLGFKLGKADPPKT-RQLQ  
SLLGTNLNYVRELIPKYSAKVLYWTENMENARLRLIQMASGELERREDQ  
VPLSVHV--TEQDGELTLANYIAFLSHQPSMKKFSEAEHVLASVTKWLL  
QLKAIVKEQPIIVFSMAGEHW E-VLGGNQFDWFTDGLAVLQKAVEFH  
KEIILTS DSEYIVQGVQKHKEQWEKIN KQEVDVHFTHLSVNMVQME  
LRLRNL-SREVRKDCKVCRIYD-----FKGVTQ SLSIAGNCNFLLAID  
NHRKEIMIWPMKSALEENVVKCLSEWIKWMESLRADGAHNISGKLVEK  
FCKDNKIILTKSVAYRPQSNGIAER

>PmaFLERV

QYPLNPDAEEELGRTIEELLKLGVIAMPIQAVPKKDGTFRPVHNLKELNR  
ITQKDVRQNLNPRKSLEFLPAKTYKSVIDL SNGFW SCKLEHYSTYKTCF  
QHKGKG YRWLSLPQGYVNSPVVFQEQMEKIMEGDVTVYVDDIYWTTDS  
QEEHFYMLD EILKKEAGMKIGLKKCQIGV-SVKYLGFTINNIPVPKTLL  
DLESAMGKLIYVSG

HIPHFAAMVIHNRELTPEELTEWDTLIAVELEPREAQTPLRVETELTDRGGTLW  
VYNESLLISKVPTRELRYTGLEKELSLLYAAYKGLKKYGDPEVDIRTTWPLKW  
QMLLIDPKWQFYTDGSEAAALAWADRKFDRDIKISDSKYVVEGFDQHMEQWIV  
ISQRIWVEHIYHAGQERITRWFKRQGILYQEIKRACERCALKGGMRKKIKCAT  
HISMD-VGHEKFLIIVDNAGGYTRVYPIKRESANEAVKCLCEYVTP-----  
-----

>AciFLERV-2

QYPLRKEAEEEIMLTIKELEAQGILVLTPIQAVPKPKTYRLVHNLKALNDVTV  
KDERVIINPQKAVRETELGEFITIDLANGFWSIPLTESSSQKTAFAQIKGTAFRW  
KVLPQGLCLSPNIFQEIVEKTLEGKCTVYIDDILISHNDKEEHIECVKEVAKTEA  
GFKIGIKKLVIAAS-QATYLNFDMTNLTLPETVLQAEGLLGKLEYVRNHIPHFAA  
KPLHDRKLTGEKEAARLLITAELKPIR-NVPTQIEMQVDAEGGNARCIQEVLF  
ESVTDAAEEKFADEEKELTLMYKLWPYWRKSGQITFITVHNGNNVKWNTLLQ  
DPEVKIYTDGSEAAALREAKNRLKRFHTVTDSCYVKDAVDFHTEQWRQIVNLV  
TVEHIIHSGWQRMLIRLNELKVSUREVKQQCEVCAERPGLRAQINTEEHFSA  
D-VGHNKFLVIQDNGSGACHVVPKTLTAQESVKALAQAIMSIKSLRTDNATHF  
VNAKVRDLLERTGIRHIKSIPYVSQTNGVAER

>NfuFLERV

QYPIR-DGRDEIRCTLAELKEKGIIECLPIQAVPKPDGTYRLVHNLKVLNRLTPH  
DVRKTFDPYMQLRTPMIKKYKTCIDLANGFWSVPLAQESRAKTGFTFEGKHF  
QWCVLPQGFVNVPNLFQGIVQSYLEDPVVQYIDDLFFTHDCESEHLKTLDEV  
VTTCAGFKLNLKKSQGR-TVTFLGFEVSNITPPHDLLTLEGVIGQLQYISSNV  
RDFRIDPIMNRKLSSQELETYQAVMLVNLNREHHEPLAVRVIVGQDFTECLF  
QNYITCKGYKPTESRYTPSEKVLTTLMKHKDMMFALAGSQKIIIQSTDYMKW  
EMLLANPQIHVYTDGSTAALADACKLLRSVRLVTDISKYVTDGLDGHADLWT  
LVSCQIQVTHVNHV GALRLREIFKKEKISTARVKATCEPCKLKGGGAQPPIMCD  
VHFSTD-VGYKFFLVIKDWTGDQSKIPLKRVTGNTVSMALSHL---PLSLRSDG  
GPEFKNDKVSCLLESRGIRHIFSIPYESHTNGIAER

>NviFLERV

QYPIKREAKASVKEILTHLENQDVIENNPLFPVAKPDHSYHIVLDYRHLNSHTR  
SFAIHNTHSSTLVNNLTRKKYKTTLGISN-FFTQNLAPESQDWSTFTCLGIQYKF  
WRLPMGYKNSLGVFAVRIELLQLDAVSIDYIYVTDDEMQQHLARVDRIISA  
SGYKINFKKSIAF-FVLFLGYKLNVLQDPNTLTKLHSLNFLNFGRRYIPEYAI  
KPLYWTD AHTDILRSLQRDLELHLHTRDNTTNLEIRVSPSATGFTYMTFNEMA  
YKSHLSVEMRFASTDFFFTAVQMAILKERPLAQQKRIVVTPVPAQWAASLTSV  
DVDFYIDCTTSLVLALTHADILTLIISDSHYCVRAYE-HKTLWVQVATQTHVVH  
TLHVG VQATITLLQQQYKEARKYVLECDICQQIKTSTILFISDKCAYLDRCGAK  
YILVAVDCSRFLWVWPQRSADARTVIKDLRVL---CRTFHADQGP AFASKAYR  
EALES LGVQIHYS SPYRPEGNSVVER

>exNFVtwe.34

-----LFPVAKPDHSYRIVLDYRHLNSHTRTFAIQNAHSTALIN  
NIVRKKYKTTLDISNGFFCQNLAHESRDLSAFS-FGSQKRFCRLPQGYKNSPGL  
FSARVTSILHDEALS YVDDIYLTDDDLIHLVRVDRILGNFGYKFNFRKSKIAF  
LSVLFLGYELSNLHPPNTLKKLQSLGFFNFGRTYIPDYAQKPLYWTVEHTRIL  
RDLQQDMAKHLHTRDNKTNLVIRIAGAIGFTYVTFNEIAYKSHLNAEQRFAP  
TEKILTAVQMAVIKERPLAQGKRIIVVTPVPAQWATSLTSTDVEYYTDGSAALL  
LALEHTEVTLIVCDSY YCVQSYNDHKILWGKVADSVHVHTAHAGVQATIT  
LLQQRKYGTRQYVLCCDICQQIKGSNIKRRPLQCVYLDHCGPKYILVTVDS  
RFLWVWPQRSADARTVIKDLLIFIGTVA AFHSDQGPAFASKAFRDTMGTMGV  
ELHYSSPYHPEGNSVVER

>exNFVtwe.41

-----KKYKTTLDISNGFFCQ  
NIAPESRDLT SFSALGSQKKFCRLPQGYKNSPGLFAARVTSILHDEALS YVDDI  
YLTDDDELLQHLSRVARIVVGAIGYKFNLKKTKIAFLSVLFLGYELSSLQPPNTIR  
KLQSLGFLNFGRSYIPDYASKPLYWTVEHTRILRDLQTDMAQHLHTRDNKT  
HLVIRVIPGAIGFTYVTFNEMAYKSHLMAEQRFAPTEKILTAVQMAVIRERPLA  
QGKRIIVVSPAQWATSLTATDVDY YTDGSAALIMALEHADQPTLIVCDSY YC  
VQSFNEHRLWLGKIADNVHVHTAHAGVAATISLLQARYKQTKQYVLCCDIC  
QQIKGSTAKRKPLQCVYLDHCGPKYILVAVDSCSRFLWVWPQRSADARTVIK  
LRVFIGTVA AFHSDQGPAFASKAYKEAMGSLGVQLHYSSPFHPEGNSVVER

>exNFVtwe.17

-----KKYKTTLDISNGFFCQ  
NIAPESRDLT SFSALGSQKKFCRLPQGYKNSPGLFAARVTSILHDEALS YVDDI  
YLTDDDELLQHLSRVARIVVGAIGYKFNLKKTKIAFLSVLFLGYELSSLQPPNTIR  
KLQSLGFLNFGRSYIPDYASKPLYWTVEHTRILRDLQTDMAQHLHTRDNKT  
HLVIRVIPGAIGFTYVTFNEMAYKSHLMAEQRFAPTEKILTAVQMAVIRERPLA  
QGKRIIVVSPAQWATSLTATDVDY YTDGSAALIMALEHADQPTLIVCDSY YC  
VQSFNEHRLWLGKIADNVHVHTAHAGVAATISLLQARYKQTKQYVLCCDIC  
QQIKGSTAKRKPLQCVYLDHCGPKYILVAVDSCSRFLWVWPQRSADARTVIK  
LRVFIGTVA AFHSDQGPAFASRAYRDAMASLGVQLHYSSPFHPEGNSVVER

>exNFVtgr.88

QYPIKRDAKSQIKEILSQLEYQGVIMNNPLF-ILKLDQSYRIVLDYRLLNSHTRT  
FAIQNTHSTALVNNIGRKEIKTTLDISNGFFSQNLAPESKDCTVFSALGFQKRFS  
RLPMGYKNSPGVFAARIISILHEEALS YVDDIYLTDDDEIRPHLEGVSCIILRSLG  
YKFNFKKSKIA YLSVLFLGYELSHLQAPNTLKKLQSLGFLNFGRTYIPDYAQ  
KPLYWTSEHSAILRSLQSDLAQYL RTRVNTNLVIRVLPSANGFTYLTNEMAY  
KSHLPAEMRFAATEKILTAVQMAILKERALA QGKRLIVVSPVPAQWAASLTAV  
DADFYTDGSAALLVLMHADLFTLMVTD SY YCVRAYNDHKTLWVQVATQT  
HVVHTAHAGVHATISLLQQR YRDARTFVATCDICQQIKVSTVARKPFGCVYLD  
HCGPKYTLVAVDSCSTRFLWVWPQRSADARTVSKDLQVFGTCCVHSDQGP  
AFTSKAYRDAMD SLGVQVHYSSPYR PQGNSIVER

>exNFVtgr.86

QYPIKRDAKSQIKEILSQLEYQGVIMNNPLF-ILKLDQSYRIVLDYRLLNSHTRT  
FAIQNTHSTALVNNIGRKEIKTTLDISNGFFSQNLAPESKDCTVFSALGFQKRFS  
RLPMGYKNSPGVFAARIISILHEEALSYVDDIYLTDDDEIRPHLEGVSCIILRSLG  
YKFNFKKSKIAAYLSVLFLGYELSHLQAPNTLKKLQSLGFLNFGRTYIPDYAQ  
KPLYWTSEHSAILRSLQSDLAQYLRTRVNTTNLVIRVLPSANGFTYLTFFNEMAY  
KSHLPAEMRFAATEKILTAVQMAILKERALAQGKRLIVVSPVPAQWAASLTAV  
DADFYTDGSAALLLVLMHADLFTLMVTDSSYYCVRAYNDHKLLWVKVTDLT  
HVTHTAHAGVHATISLLQQRDARTFVATCDICQQIKVSTVARKPFGCVYLD  
HCGPKYTLVAVDSTRFLWVWPQRSADARTVIKDLQVFGTCCVFHSDQGPA  
FASNAYRDAMDSLGVQVHYSSPYRPEGNSIVER

>exNFVtgr.83

QYPIKRDAKSQIKEILSQLEYQGVIMNNPLF-ILKLDQSYRIVLDYRLLNSHTRT  
FAIQNTHSTALVNNIGRKEIKTTLDISNGFFSQNLAPESKDCTVFSALGFQKRFS  
RLPMGYKNSPGVFAARIISILHEEALSYVDDIYLTDDDEIRPHLEGVSCIILRSLG  
YKFNFKKSKIAAYLSVLFLGYELSHLQAPNTLKKLQSLGFLNFGRTYIPDYAQ  
KPLYWTSEHSAILRSLQSDLAQYLRTRVNTTNLVIRVLPSANGFTYLTFFNEMAY  
KSHLPAEMRFAATEKILTAVQMAILKERALAQGKRLIVVSPVPAQWAASLTAV  
DADFYTDGSAALLLVLMHADLFTLMVTDSSYYCVRAYNDHKLLWVKVTDLT  
HVTHTAHAGVHATISLLQQRDARTFVATCDICQQIKVSTVARKPFGCVYLD  
HCGPKYTLVAVDSTRFLWVWPQRSADARTVIKDLQVFIGTCTRVFHSQGPAPAF  
ASKAYHDSMDSMGIEVHYSSPYRPEGNSLVER

>exNFVtgr.85

QYPIKRDAKSQIKEILSQLEYQGVIMNNPLF-ILKLDQSYRIVLDYRLLNSHTRT  
FAIQNTHSTALVNNIGRKEIKTTLDISNGFFSQNLAPESKDCTVFSALGFQKRFS  
RLPMGYKNSPGVFAARIISILHEEALSYVDDIYLTDDDEIRPHLEGVSCIILRSLG  
YKFNFKKSKIAAYLSVLFLGYELSHLQAPNTLKKLQSLGFLNFGRTYIPDYAQ  
KPLYWTSEHSAILRSLQSDLAQYLRTRVNTTNLVIRVLPSANGFTYLTFFNEMAY  
KSHLPAEMRFAATEKILTAVQMAILKERALAQGKRLIVVSPVPAQWAASLTAV  
DADFYTDGSAALLLVLMHADLFTLMVTDSSYYCVRAYNDHKLLWVKVTDLT  
HVTHTAHAGVHATISLLQQRDARTFVATCDICQQIKVSTVARKPFGCVYLD  
HCGPKYTLVAVDSTRFLWVWPQRSADARTVIKDLQVFIGTCTRVFHSQGPAPAF  
ASKAYRDSMESMGIEVHYSSPYRPEGNSLVER

>exNFVtgr.84

QYPIKRDAKSQIKEILSQLEYQGVIMNNPLF-ILKLDQSYRIVLDYRLLNSHTRT  
FAIQNTHSTALVNNIGRKEIKTTLDISNGFFSQNLAPESKDCTVFSALGFQKRFS  
RLPMGYKNSPGVFAARIISILHEEALSYVDDIYLTDDDEIRPHLEGVSCIILRSLG  
YKFNFKKSKIAAYLSVLFLGYELSHLQAPNTLKKLQSLGFLNFGRTYIPDYAQ  
KPLYWTSEHSAILRSLQSDLAQYLRTRVNTTNLVIRVLPSANGFTYLTFFNEMAY  
KSHLPAEMRFAATEKILTAVQMAILKERALAQGKRLIVVSPVPAQWAASLTAV  
DADFYTDGSAALLLVLMHADLFTLMVTDSSYYCVRAYNDHKLLWVKVTDLT

HVTHTAHAGVHATISLLQQRYPDARTFVATCDICQQIKVSTVARKPFGCVYLD  
HCGPKYTLVAVDSCTRFLWVWPQRSADARTVSKDLQVFVGTCCVVHSDQGP  
AFTSKAYRDAMD SLGVQVHYSSPYRPQGN SIVER

>exNFVtwe.30

QYPIKHEARAPVKEILTQLEYQGVIMNNPLFPVAKPDHSFRIVLDYRHLNSHTR  
TFAIQNAHSTALINNIVRKKYKTTLDISNGFFCQNLAEESRDMSAFS-FGSQKRF  
CRLPQGYKN SPGLFSARVTSILHDEALSYVDDIYLTDDDLIHLVRVDRIILGNF  
GYKFNCRKSKIAFLSVLFLGYELSNLHPPNTLKKLQSLGFFNFGRTYIPDYAQ  
KPLYWTVEHTRILRDLQQDMAKHLHTRDNKTNLVIRIIAGAIGFTYVTFNEIAY  
KSHLNAEQRFAPEKILTAVQMAVIKERPLAQQKRIVVTPVPAQWATSLTSTD  
VDYYTDGSAALLLALEHTEVLT LIVCDSYYCVQSYNDHKILWGKVADRVHVT  
HTAHAGVQATITLLQQR CRRTKQYVLCDDICQQIKGSNIKRRPL-----  
-----

**Data set S4. The alignments used to build the phylogenetic trees for Env r  
e presented in Fig.3**

>exNFVtwe.26

SQQDAAARLRQIDQKNLQKALAVVDNGMNILSDRIYTLNNIVSSAIDIIQSDVS  
SLHLGQDQIRSIMQLGWTLQTLKAGRVPWQHVSVRDIFFTFNLTRQQQLMAK  
KEATYVMLNIEKLEKLP AEWLIHGVINLPSTLQFTSCLKHVPVGRYERLGDSY  
IHEVWELPFKYKCLSGMKEVFLSGSECSVGHS MICKQLSLHGACNASAALAC  
YKGVPPVIRPVFQVLSNGSYVLLNSEDCCGM RAGIVYIVSVSMIVTCCGNV  
LFPTRQTEVAEWP HIATSNVNFDKLSRLKALLFQKHVALTSASETYALQVA

>NviFLERV

SKLDAAIRLHQIDEDNMNKVLGVVDNSINTLSSRIYDLENV FSSVIDIVQSDVS  
TFYHVQTQLRPILDFSWTLQTLKSGKVPWSYLN VSSLFSR FNLTRSQRLMAQK  
SATYTMLHLEKLERLPTVWLIHG VITLPIATFKFTDCMKYIPFRSCTKIADSYIH  
EKWFLPFLYRCYSGEKEVFLSVRDCSLGHSLVCQEITVHGACTASTPLSCALR  
GLPVSFIAGKTHVLVNGSYVMLNEMDCCGMIAGIPYIVTVSHPVTCCGV LIFP  
PSHKTLESSWPHIPTQNYNFDKLSRLKALLFHKKVYLTSACETFNLQVA

>exNFVtgr.91

-----LNWMLQTLREGRVPWG  
YLNTLILFSQFNLTHTQQIMAQKSASYVMLHLERLDTLPATWLIHGIIITLPISTF  
TFSSCMEYIPLGSFVPLGDGYLHEVWSFPFQYRCWRLDHEVFLSVADCSHGRS  
MTCAQITVHGACNISVPLSCVLKGPVPAIVPYVRMLYNGSTVLITNRECCAM  
QAGIPYLVSVSGTITCCDVPLFPPPHSVIDTVWPAISTFSPNLDRMSRLKALLFR  
EKVQLTSASETFKLQVA

>exNFVtgr.99

SQIEAAVKIRQIDQDNIEKVFNVIDNSMNTLSSRIYSLSDIVSSVIDVVRDDVTQ  
LYHGQSQMKSVMRLNWMLQTLREGKIPWSYLNVTALFSQFNLT VKQQQLMA  
QKSASYLMLHLERLDTLPATWLIHGLISLPIATLTFVSCMEYIPVGYFVPLGSGF  
LHEVWSFPFKYRCWRLDREVFLSVSACSHGHSLSCAHITIHGACNITVPLSCL  
LKGTPVSEIISTARVLYNGSTVLVNDRECCAMRVGIAYLTVSNTLTCCDVHLF  
PPTHNLVDRVWPTINTCTTNLDRMSKLLKALLFHKEVQLTSATETFKLQVA

>exNFVtgr.100

SQIEAAVKIRQIDQANLEKVFNVIDNSMNTLSSRIYSLSDIVSSVINVVR-DVTQ  
LYHGQSQMKSVMRLNWMLQTLREGKIPWSYLNVTALFSQFNLT VKQQQLMA  
QKSASYLMLHLERLDTLPATWLIHGLISLPIATLTFVSCMEYIPVGYFVPLGSGF  
LHEVWSFPFKYRCWRLDREVFLSVSACSHGHSLSCAHITIHGACNITVPLSCL  
LKGTPVSEIISTARVLYNGSTVLVNDRECCAMRVGIAYLTVSNTLTCCDVHLF  
PPTHNLVDRVWPTINTCTTNLDRMSKLLKALLFHKEVQLTSATETFKLQVA

>exNFVtgr.9

SQIEAAMKIRAIDQQNLNKVLNVIDNSMNTLSSRIYGLNDIVSSVLDVVDV  
SNLYQGQSQLKSLMSLNWMLQKLREGKVPWTYLNSSALFAQFNLTSTQRLL  
AQKSASYLMLHLERLDTLPATWLIHGLITLPIASFHFSSCMEYIPVGSYVPLGK  
GYLHETWSFPFKYRCFRSDLEVLLSVSDCRHGHSLVCTNINIHGTCNNSAPLA  
CVLKGTPVNEILPVARILYNGSTVLINDRCCAMQAGVAYMVTVSNALTCCDV  
ALYPPTLGQLDKIWPSVNTFSTNLDRLSRLKALLFHKEVRLTSASETFKLQV-

>exNFVtgr.8

SQIEAAMKIRAIDQQNLNKVLNVIDNSMNTLSSRIYGLNDIVSSVLDVVDV  
SNLYQGQSQLKSLMSLSWMLQKLREGKVPWIYLNSSSLFAQFNLTSTQRMFA  
QKSASYLMLHLERLDTLPATWLIHGLITLPIASFHFSSCMEYIPVGSYVPLGKG  
YLHETWSFPFKYRCFRSDLEVLLSVSDCRHGHSLVCTNINIHGTCNNSAPLAC  
VLKGTPVNEILPVARILYNGSTVLINDRCCAMQAGVAYMVTVSNALTCCDVA  
LYTPTLGQLDKIWPYINTFTTNLDRLSRLKALLFHKEVRLTSASETFKLQV-

>ERV-Spuma.b-Ame

TWKEVILAIQXTEQEAVKEGFKAADENFYQLQQGLYILRDVVTSVIGTLXHDL  
SAIRNDQQAASSLTLVSNFLDTLTRGVPXWXLITWPNQMNELNLTKRAKRQA  
MKRTSYTLLSTLSKKFYSQSWTIHGILDIPVASVSTMYCHALMNWGTMRVE  
GQWIRSSYVVPYTHACVEDPTVRLYALVNCVGAARLQCQEVTRKNPCSQ-XV  
DECXLHADKMGTFSSKAHLLPNGSYVVQFNTSCCNIPKGVTTLITVTSTVKCC  
GYXLTPPVQVRPTQLWPKLVLQXMDFPVLTLLRLAELSKMKIIKSTAQTFEEAA  
S

>ERV-Spuma.a-Ame

TWSQAIMQILQTESEAVQRGFHVSDANDQALQQGFYALRDVITDVVGLIQND  
LSIIRNDQEASVLSVVTDFLDTLRSGVPDWNVISWPEIQALNLSKVATRQA  
MSGSTFLLLSVLAKSVVATNWIVHGVLDIPIQTAPSIICQELHSGNVHWNVD  
TWIREDYVVPYSHACVARPXLTYSLRDCKGSTRIMCEHAEPVNSCDS---SKC  
TLHIAPIDSFYCKAHLRQNGSYLVHFNQSCCHVPIGIPTLITVGTQVKCCGFILD  
PPSPFQLKSLWPGXNLQKLEYPKLSLYIAKLLKMXLEVXSTEDTYLQAHS

>SloEFV

PNTQRLEKVSMMANSTATVSKLSDLNEYLFADGLHILKDHVVTLLLEANMKD  
TQHIDELTTAMLILSYIQNFRIPSTEGRIDWRILNGTWINEGLNIPHHGMQIVKR  
MSCSNIYDIKTIK--SIWEIGIYYQIILPNKVFYTNWQVLNIGHLVKTGTQLTLT  
KIHQPYPYTHIS-ECSELYYLEPKGCEQRDYLICEEINLHQTCGNKT-SKCPVTGKA  
V--PYLEFIPLKNGSYVMSYTIDCNIPPYQSSIFTINDTVTCFEKILKKHLF-----  
-HIPKIQLRPLHLVILAKLKKIEVKATDTWASIEEQIE

>SFVppy

NNYVKLRSMGYSLTGAVQTLISKISDINDENLQQGLYLLRDHLVTLMEATLHDI  
SLMEGMLAVQHLHHLNHFKTMLLERRIDWTFINSDWLQQQLQQPTDHMKII  
KRTARSLVYYYVEQTSNSPTSWEVGIYYEIIIPKHIYLNWQIKNIGHLIHSAGQL



THVTIDHPYEILNRECEETKYLHLEQCIKQDYVICDIVERVQPCGNTTGTDCAV  
YAKAIKSPYTEILPLKNGSYLVLSDESTSCNILPYIPSIVTVNETVECFGLFKKPL  
TAERKTDTPHIPPLRLRPLHLLGIIAKLKNIKIEVTSTQENIKDQIE

>SFVpve

NNYAKLKSMGYALTGAVQTLSQISDINDENLQQGIYLLRDHVITLMEATLHDIS  
VMEGMFAVQHLHHLNHLKTMLLERRIDWTYMSSAWLQQQLQKSDDEMKV  
IKRIAKSLVYYVKQTYNSPTAWEIGLYYELTIPKHVYLNWNVNNIGHLVQSA  
GQLTHVTIAHPYEIINKECTETKYLHLKDCRRQDYVICDVVEIVQPCGNSTDS  
DCPVWAEAVKEPFVQVNPLKNGSYLVLASSTDCQIPPYVPSIVTVNETTSCYG  
LNFKKPLVAEERLGEPRLPNLQLRPLHLVGIIAKIKGLKIEVTSSGESIKDQIE

>SFVggo

NNYSKLRSMGYALTGAVQTLAQISDINDQNLQQGIYLLRDHIVTLMEATLHDI  
SIMEGMFAVQHVHHLNHLRTMLMERRIDWTYMSSSWLQTQLQKSDDEMK  
VIKRTARSLVYYVKQTYNSLTAWAIGLYYELIIPRHIYLNWQVNNIGHLIKSA  
GQLTHVTVSHPYEIIINRECSNTLYLHLEECRRLDYVICDVVKIVQPCGNSSSDSD  
CPVWAEVPKEPHVQISPLKSGSYLVLASSTDCQIPPYVPSVTVNETTQCFGVT  
FKKPLVAEETSEPOLPHLQLRPLHLVGIIAKIKGKIEVTSSGESIKDQIE

>SFVmcy

NNYERLRSMGYALTGAVQTLSQISDINDERLQHG VYLLRDHVVTLM EAALHD  
VSIMEGMLAIQHVHHLNHLKTMLLMRKIDWTFIRSDWIQQQLQKTDDMK  
LIRRTARSLVYYVTQTSSSPTSWEIGIYYEIVIPKHIYLNWQVINVGHLLSAG  
HLTHVKVKHPYEIINKECSDTQYLHLEECIREDYVICDIVQIVQPCGNATESDC  
PVTALKVKTPYIQVSPLKNGSYLVLSSTKDCSIPAYVPSVTVNETVKCFGVEF  
HKPLYAETKTSEPQVPHLKLRLPHLVTGIIASLQSLIEIEVTSTQENIKDQIE

>SFVcae

TNIEKLRSMGYSLTGAVQTLSQISDINDERLQQGVSLLRDHVVTLM EAALHDI  
TIMEGMLAIQHVHHLNHLKTILLMRKIDWTFIKSNWIKEQLQKTEDEMKIIR  
RTAKSLVYYVTQTSSSTTSWEIGIYYEITIPKHIYLNWQVINIGHLVESAGHLT  
LIRVKHPYEIVINKECTYEQYLHLEDNISQDYVICDTVQIVSPCGNSTTSDCPVT  
AEKVKEPYVQVSALKNGSYLVLTSTRDCSIPAYVPSIVTVNETVKCFGVEFHKP  
LYSESKVSEPQVPHLKLRLPHLVTGIIANLQNLEIEVTSTQESIKDQIE

>SFVssc

HNWGKLQAVGFTITNTVSKIARIIDLNNEHLVSGLYLLKDHLVTLMEATLHDIS  
ILGNAVAIQHFHHLTQLKLLLMENRMDWTFIDSSWIQDQLKLSDEDMKILRR  
ASRALVYKVEEIGEGVTIWEIGIYYEIIIPRVIYSTNWKIMNLGHLVYSADNLVQ  
INVEQPYEILNVECGKSTYLHIDKCEEQDYVICEVIQEKQPCGNQSGSDCPVK  
ARTIEKGYTYIQPLKNGSYVVM SHFQDCHIKPYIPQIVTVNATVKCLGEVFQPP  
LVPGNSSTLPVTTSLKLQLPHLVTGIIITKLGKGFQVQITSTWESIKGQVE

>SFVaxx

NNWNKLQKAGYAITNSVKQIAQISDLNDESIVSGLYLLRDHVVTLM EATLHD  
VSALEDSIAIQHFHTHLMQLKLLLMENRVDWSYIDTQWIKTQLQLNDEDMKV  
LRR TARALVYNIDHIEDTKTIWEIAMYYEIIVPSVIYSTNWNVQNVGH LIASAG  
SLTLVKVKHPYEIINQECGIIKYLHIENCQETDYVICDTIEEVQPCGNQTGSDCP  
VLAEPVPDGFHVIESLKNGSYIYMSHYQDCSLTPYIPQVVTVNATIKCLGRNL  
KPPLSQTEAETTPQVPRLKIQLPHLVGVITKLKGIQVKITSTWETIKDQID

>SFVcja

TNWQKLQKAGYAITNAVTQIAKITDLNNEAIVSGIYLLKDHI VTLMEATLHDV  
SALGNVVTIQHFHTHLAQFKLLLVENRIDWNYIDSRWIQDQLGLDEADMKIL  
RRTARALIYNVEEIDFRPTTWEIALY EIIVPGKVYSTNWEVHNIGHLVDSAGS  
LTLVTIQHPYTIVNQECGETKYLHMEECTEQDYKICEQVTEVLPCGNLTGSDC  
PVLAKTVKPGYVHIESLRNGSYIYMAHYQDCGIKPYVPQIVTVNATVKCLGY  
EIQPPLQFEETTSTPQVPSLKLRLPHLVGILAKLKNIQIQVTSTWESIKDQVE

>SFVocr

TNFHKIQSIGFNLANAISTVSKISDLNDNQLAKGMHVLRNHLVTLMEATLHDI  
SKFESGLALQHLHTHLAQLRSTLQENRVDWSILDTAWIQSELNTDDNTMKLIK  
RTAKAMVHHVQQTQKSLTTREVG IYFEIIPAAIYTQNWQPLNLGHLVFNSGQL  
TQVFVEQPYNLVSMECNIPTYLHIEECVNQDYLICDIVEEVLP CGNQTGSDCP  
VMAKAVKAPFVSITPLKNGSYVILADTSACTIPAYSPVLVTTNDTLQCYGHILK  
RPLKNHKDLPEPRVPDLVIRLPHLVGVIAQLKDLKFQVTSSWESIKDQIA

>EFVeca

DNFRKLQTSGLSMNQAISTLAKISDLNDENLAAGIHL LQEHIVTLMEATVHDIS  
MLEAAHGLQILHHLSTLRLLLTENRVDWNLIDSTWIQQQLQADEALMN VIR  
RTARSM TYRVIQQINRPTLWELGIYYELIIPKKVWLTNWKIQNIGHLIK NAGHL  
ARVELQHPYEIVNQDCEQLTYLELKGCELDYLVCEEILQHEPCGNQTGSDCP  
VTAQKIKDPYVWIYPLKNGSYLIMSSHTDCAIPPYEPVLVTVNDTVRCFGTTL  
KKPLRTSLETFQPHIPQLQVRLPHLVGLIAKIKGLKIEITSTWENIKDQIK

>BFVbta

NNWRR LQITGQSMNQAITTSLKLSDLNDENLAAGIHL LQDHIVTLMEATLHD  
VSLLGHM TSIQHLHHLATFKNLLIGNRVDWSVLENKWIQEELKYTDEVMNV  
IRRTARSITYDVQNVKNTSTMWEIYIYYELILPERI WIRNWQVANLGH LTHNSG  
YLTHVTIHHPYEIVNQDCEELTFLHLVDCHEQDY LICEEVMEVEPCGNLTGSD  
CPVLAENIQAPYVYLHPLKNGSYLLMASHTDCSLPPYEPVVVTVNDSLECYG  
KPLKRPLTSHTEIKAPQIPQLRVRLPHLVGIIAKL KSLKIKVTSTWESIKDQIH

>FFVfca

ENLRRIQEAGLGLANAITTVAKISDLNDQKLAKGVHLLRDHVVTLM EANLDD  
IVSLGEGIQIEHIHNHLTSLKLLTLENRIDWRFINDSWIQEELGVSDNIMKVIRK  
TARCIPYNVKQTRNLNTAWEIYLYEIIIPTTIYTQNWNIKNLGH LVRNAGYLS  
KVWIIQQPFVNLNQE CGTNIYLMEECV DQDYIICEEVMELPPCGNGTGSDCP

VLTKPLTDEYLEIEPLKNGSYLVLSSTTDCGIPAYVPVVITVNDTISCDFKEFKR  
PLKQELKVTAPSVPQLELRVPRLTSLIAKIKGIQIEITSSWETIKEQVA

>ERV-Spuma-Cma

TNLQKIQEAGLIPDSSITKTAKISDLNDKQLAKGLHLLRDHLITFPEHTI-DVIQ  
MSQSIIAVMTHSHIQNLRILLTEGKVDWDTLNSTWIQEQLRVSDMMTLIRRT  
ARGLAYDIQQRVDKPGVWEISLYEIVIPRRIYSTNWKIINYGHLVYTGNRGGR  
VWLKHPCTLITQGCGEVKYLEVRECYEQDYLICDEVIKHEPCGNQTGSRCPI  
VEPIVSPYLRIGPLKNGNYIVTTSLEDCSIPPYQPSLITVNETVTCYGYEFKSPLR  
INTVIQNIHMPPLSVSLPHMIGIADLRQIKIELASSWDSVHDVTE

>ERV-Spuma-Cbo

TNLQKIQEARLILGSFITKIAKISDLNDKELSKGIHLLRDNLITFAEHTIDDVIQM  
SQTITVMILSHIQNLRILLTEGKVDWNILNSTWIQEQLRVTDIITLIRRTARGL  
AYDIQQWVNKPGVWEISLQYDIVIPQRIYPTNWKIINYGHLVYTGNKGGRIWL  
KHPYTLITQGWGEVRYLEVRQCYEQDYLICDEVIEHEPCGNQTGSRCPIV  
IVSPYLRIDLKNGSYIVMTSLEECNVPPYQPSLITVHETLTCYGYEFKPLRKN  
TVIQNIPVPLSVSLPHMIGIADLRRIKMEASSLESKYLTTE

>ERV-Spuma-Hha

-----DLNDQNLKRGVYMLRDYSVQAFEAIYHDISMLEENIALQH  
LHIHLSSLRMTLIEGKVPWELINDTDIQYQLKLTDNQMRMVRKTAKALPYHIE  
QRAR-----TKDWHLHGI-----KYLHLEQCNHDTY  
TVCDEVIEPEPCGNRTGSDCPVYTKAVQTPYIQIHAMKNGSYIIMSDTSECNIPK  
HQSSLITVNSTLTCYGYTFSPPLKTEEVQTD FEVPRIHLLLPHLAGVIAHLRNV  
EIQLTSTWESIKDLIA

>ERV-Spuma-Ppi

KGISAGLASRALISKAIVLSRSDVNDQTLKGGILLIKKY LISAFSIIQHDFSTF  
SDALTIQSLHVRVMKCVLQLSQEKAPWLLINQTEIQHALRLSEEQMQIVRHTA  
KAYVYRVKKQRDKTSRWSIYFYLELHVPGEFYMTNWKLNIGWLVATGKHL  
GLSHLIPPFQFVSFLRGQQKFLSVHGCVDYGYLFC EEITETAPCNKKDLGNCP  
VTLQPVNASYLKVEPLKNGSYLILSGAPGCGVAAHKPAIVTLDTRRVCFGQEL  
SPPLEPTALSQTIQIPILNLHFPLLAGIIANL KELQIELFSTYDPVETILE

>ERV-Spuma-Gja

KGVSAGVASRALISKAIVLSRSDVNDQTLKGGILLIKKY LISAFSIIKHDFST  
FSDALTIQSLHVRVMKCVLQLSQEKAPWFLINQTEIQHALQLSEEQMQIVRHT  
AKAYVYKVKKQRDKTSRWNIYFYLELHVPGEFYMTNWKLNIGWLVATGK  
HLGLSHLVPPFQFVSFLRGQQKFLSVHDC TDYGYLFC EEITETAPCNKKDLGN  
CPITLQPVNSSYLKVEPLKNGSYLILSGVSDCGIAAYKPVVTL DTHRVCFGQE  
LSPPLEPTSLFQTIKIPVLNLHFPLLAGIIASL KELKIELFNTYDPVEKILE

>ERV-Spuma-Spu

NNAQIFRKTNFLLAKSMEKISRLQDANNINLRNGIYLVKDALTQVALIVKHDL  
AVLSDELTM EIIVTQLQKISSLSNGHV PWTIVNTTEIQHSLSLSEENMRILQHTA  
RALIFNMKPLPDSVTRWNIHFLIHLKIPSMIYLTNWNVNLNIGFLLATGTNIAHSH  
MKLPYEYVTTVFGNITYLHTEECQDFGYLFCKQITHVSPCGLVPPNSCPIQIQS  
SNVSFVFIDSLTNGSYIVLAGKSECNIPALQPSIITVNGTINCYGKKLFPPPNLGS  
MHSTFFVPHFSLQFPLLTGIIAKLQRSEITLFNTHDAIEDVLQ

>ERV-Spuma-Smu

NNAEVSITTGHLLSDAVSIISHVSDANDEELKKKVLLLDHLLIIFISAAMSDFTV  
LAEELRALMVLNKL TAMRLTLQGEQIDTLLNVTWIKQLGLSERQTEVLAH  
VSKLRVYDIKELKHRQSQWELFLYELIIPGDVYTTNWELDNFGHLIDTADDL  
ALMQIKQPYDYISYKCGEHFYLKVEKCTEIGYLVCGEIYTVLPCGADGKSDCE  
ITVHPVVAPYTRIESLSNGSYLVLSSTSECNIPSMQPSIITVNTSVECFNIIFTPPL  
QTQTVLQRFDVPHFVLQLPYMTAFLAHLKSMKIIIGTTHDAIDVLTQ

>CoeEFV

TNDQYLTQSATLTNKAINLLSQTMDNFAQLEQGFKVLQSSLMHTLRVLT KD  
MATLGDAIKVKQVEAQIQRGLALLENKVPWALLNISNILERFNQSAEMNAV  
MRHTATAYLYNIKQVKQDFYIMQFIVQMQLPVTGGIYYKVWEIYNPGFLVKT  
NLLALAKVRPPYQYIAKKCGNINYLKVKECYLRGFRYCDNWEKQLPCGKQ  
TTQSCPITVKPIYSTFAQVTSLGNNGSYIIMVSYSECDIPSMRTVIVTPSTRMTCY  
NMTLF-PLNVS RVNAEEGVTPFHLD FPILVAVIARLQDYEITLSYTHDNITQLLA

>exCFVrbi.5

ALKQEVQNTFLNLDRIKTAIKGIQSNEYQLRAGIFQLRDYLAQTLQLGIDAIS  
TTDEKIQVLARIEQLTHFIDGLTSPKPKWGDLQLGKILEEINLTAEQIQYAHVEA  
SQVILQVSKHEMGKTLVQGVRRIFLPITTVYKRCWEIQNFGQFLESSNGIKTI  
KIFEP-THLCINNAGYHWIIAQGCHKVPVTVCNLSVQSNTCLTLEGADCPLEPN  
PGP-LVEVFLKLPNGSYILRSNKAQCGFQPGILYLV TALSVIKCGPWEFYPTLSA  
RLTET-KYMEFKPVQFTELKMLLTHVLNVNVLRLNLSSLWLMSED

>ERV-Spuma-Rbi

ALKQEVQNTFLNLDRIKTAIKGIQSNEYQLRAGIFQLRDYLAQTLQLGIDAIS  
TTDEKIQVLARIEQLTHFIDGLTSPKPKWGDLQLGKILEEINLTAEQIQYAHVEA  
SQVILQVSKHEMGKTLVQGVRRIFLPITTVYKRCWEIQNFGQFLESSNGIKTI  
KIFEP-THLCINNAGYHWIIAQGCHKVPVTVCNLSVQSNTCLTLEGADCPLEPN  
PGP-LVEVFLKLPNGSYILRSNKAQCGFQPGILYLV TALSVIKCGPWEFYPTLSA  
RLTET-KYMEFKPVQFTELKMLLTHVLNVNVLRLNLSSLWLMSED

>AciFLERV

-----ADLDGKDYSK GEGTVS QY WASRCDITQVGAWSEGYWKYN  
CSRMKSHNTMKGVLEQWPLFDAPDKTRTWGWLQKEETEAWVLPCLSQTK  
NYWIKYQYVATGLYEWYRWTGI-----RPSVTLTPRPWKMR CN---  
----ANDTCIELARRPCSELDGSNDCTEYEAQQGATWVRNDVHFLGNLTRRKQ

KEWQRAPGPGRY-----GCVKALLGP-MVNQRQLTVPVAVSK-----AELTR  
LEEYAFRKS LCDGKEVEGF EWIGP

>AliFLERV

-----LSLNDSEWEG-----HGASRCKLWQVDISFVSTWRYDCTGIL  
RYNSTKELLQGW-VEGHSRDKTRTWGWFQREEMEHWVIPCLSQSDNYWVK  
YQYIATDIWSSAIY-----RPDRYVRPRPWKLTCI-----SGHACV  
SLARRPCSELPGEGYCGSYNTEAATVWTKTRPTTYTKLISNATNTWRRAMAC  
DH-----CVNAIIGPHMKSRKSI AIPSPD-----TMITIAESHAFRRGLCLG  
LEEEGF EWVGP

**Data set S5. The alignments used to build the phylogenetic trees for Gag-Pol-Env represented in Fig.4**

>ERV-Spuma.a-Ame

HAVNTNFTVAVAQLGGLPAELKTPANRTNNVYATLALHTNHVNWFGGNLVY  
PQTGARHGPLATPNLSL--EFLARFHPADYQLLATHFDTVRNIALQVQLQTLRII  
LGSCPSKNEDIPKWYSEKLGQLQAAYPQVTPQHRHRALAMFLP--SGCTPPLA  
SCDSWYLQLIGTPSITSLALILADIMGTQGAAAAMNLGLSIASNNYQMVESIIL  
PLLKGEPARLEVHRKLSQLNE-QEKREQFGDIVTRDHLGRRPADTQKKGNKDL  
KPKDKDTHHEGRSSKKTGGQSHRPTDYDFRDRKHMPDRSKAEGKEVKVEKK  
HTSPRTHRIVPKTKRHTIEVLLDSGSDISIFECSHLEHTRAQITPTGQTHNEVY  
FVTIQLEGKKIEALFWPQLIQKGLLAFQDWPPLYVRQAPRGFSKEVSGELMQK  
YARKWQLFKNHVGHDKECPAHVIPVLKPPPPQRQYPVKPQAVAHMQTIVDQL  
MDQGVIIKQASPHNSPVLVLPKPDGTYRFIVDFRILNAHCKTEAVQNQHSSGL  
LANLHRCKYKTNLDLNGYFTQPLSVESQKYTAFTFKGTHFQFTRIMQGYKN  
SPSTFSSRIQSLADIPNCWQYVDDIYITHENLSEHLQEVDRIHTLAACKGYLIN  
FKKSRIAHREVTFLGFTLSDEGRGLSADFLEKCANIRPPTTLRQLQAILGLLN  
GRSYVSNFAELVKPLYALIKFKAHWLPEHHTILHGVYSLMTHHTGPLQDRNT  
DKDLEINLVVGDNAFTYTVCNLGETKPIAYKSHVYSTPELKFTPEEKILASVQ  
MIIKERPLAANRTIHINTPLAQLEAATKASVPNAKALHTRWIQWSASQHAPD  
VKYHYKAELQRLSGLSWTMDTSRPDIPLDFFQVIYSDGSAIPAVGTRSKYAA  
ACAAVVGyFTEEFIHTDIATKHLGMSAQTAELHGLLLALRQADS-GKPTLVV  
SDSDYIVRAYNTDLHWWMQNDFKDIRHKTIASRQLWKQVWDLKQTCPLLW  
VMHTRAHTK--GHIHSTGNALADKYAKEHTIAAITRSATAMDEEIKEACLGPRP  
KGFPSRADREKLIAATHASTHFGVSATAQLLLDRFVWPGLRQQVKIYIANCDT  
CLQTTVDHSSKPKKEVPLRKAASPFQIYMDHIGPLPAVNKYKYILVIVDSCTRF  
TWMIPQKKADCKSVIQALRTVVAMTATQTFHADNGPAFSGRALKKALEAWG  
TEMHFSHPFSPKSNGIVERANQSVKMGLTKSILSLGGNWXDHVPLVIRSVNNL  
PRQSLGKTPFELLFGRKMYMPDLHALPSPIRNEQLLAEASPENTLKAGDWV  
LEKIHDKTPFGPSYRPAVQVIRVKGSRTAILPAIPPKRRQVSVDHLKVPVDFRN  
VSTEPSSKMVSATSGHFLSKVSTPPHVWMPFVKTYNGPATQLQVHTFSVIDES  
RLFA----SNPVSRTYRELLRTRLQTFAQNAL-FD-VFDDVEDLHEMGPVHCYVR  
YYNAFLPILWPK-YTFWEHCATVPSTWG--QQIWQIKGVHTLDACRFPHLMYF  
LNYTQFQTTCFYPEWEKTEGRNGTKHITYASGGPVLWAVQANECNKRKAG  
AISIGKLCQGMLSQYHLSEVIQSLDNFIKNWTAITQSGRVRRTWSQAIMQILQT  
ESEAVQRGFHVSDANDQALQQGFYALRDVITDVVGLIQNDLSIIRNDQEASVS  
LSVVTDFLDTLRSGVPDWNWIVHGVLVNHVWVNDTWIREDYVVPYSHACVSS  
ARLTLYSLRDCKGSTRIMCEHAEPVNSCDSNCTLHIAPIDSFYCKAHLQNGS  
YLVHFNQSCCHVPIGIPTLITVGTQVKCCGFILDPPSSLYIAKLLKMRLEV-----  
-----

>ERV-Spuma.b-Ame

RAINQNFTVVVGQPGLPGEMKTPGARAAGVFDKLALQHIDHLNWFGGRLQ  
YDPTLARHGPFHAGLSI--QQLAKFHPEQYRLLATHFENARNRALEIQFQTLKP  
LLGQMPREVGDLPKWYSEKIGQLQAAFPQVTALQRQRALAMVLP--AGCTPP  
LESCSWYIQLIGTPSITALNTILKDIINSQGAAAAMNLGLAISGGNYPMVEGII  
MPLLRGESARLEINNRLNPLTL-QQKQEQFGDIVTRDHLGRKPGENVRKESKD  
AQPEKGNAPRGRSDGKNKYNNRQDSYDFRDRTKLPLQPKKDQRADKKEK  
KQVKPQTHRIIPETKRVTIEVLLDSGSEISIKTIHLTYIEIEITPTGQVDNDVYL  
VTIQLEGKEIEALFWDHLIRGGLLAPKDWPPPYVREAPRGFSEEVDKQY  
AAAWQLYKNHVGYDIECPHTIPIHSEPKPQRQYPTPLPAVPHIQKTITQLVDQ  
GVIEQTSYNTPLVPIKPDHTYRLVLDYRELNAHARTDAVQNLHSSGLLNNI  
LRNKYKTVLDLGNNGFFAQPLAPESYKYTAFTHRGKHFQMTRLMQGYKNSPGI  
FSSRIQTLADIGNCWQYVDDIYCTDDDLEEHLERVDQIVRTLASKGYIFNFK  
KSLIAHREVTFLGFTLDQGRGLSPNFLEKCANLQSPRSLKQLQAMLGLLNYG  
RTYVPNYAELIKPLYALLKFRPSDWKSEHANILNHVYTLMTQTGPLQDRNPEK  
DLEVSLMPGKNAFAYTMCNRGDNRPAYRSHIYTIPEQKFALEERILAAVQIILQ  
KERSIAAGKTIHITPIAQLEATNRASIPNSKAQHTRWVQWMSTRAAPDVQFH  
YKEELLPMCNEWTLQNKEDIPLWMYAHVLYTDGSAIPAIGTRSKYSAACSV  
VKGRFNNEFEPLDTQTKHLGDTSAQVAELQGLLALRQVVP-NQPTLIVSDSD  
YVRAFNTDLQWWVKNDFKDSKGPISAKQLWQQVWKVKEGNSLLWVTH  
TKAHT--DHVHSTGNALADLSARERSVAALTRSATRIDEDIQACLKGPYPKGY  
PNQSEREKMITAAHSSTHFGINATTQLLQARYWWPELKKQVKHYIANCTTCL  
QTTVDHTKKPKETPLPRAQVPFECMFMDHIGPLPPVNFKYLLIIVDSCTRYT  
WIYPQRNADCRTVIKDLRSLFAMTSVQTLYADNGPAFTGKAVQEAVTSMGAK  
LSFSTPFHPEGNGVVERANGIHKQALTKCILAGGGNWLEHVPLVMRSINLPR  
QSQKSPHELLFGVPMYMPDLHNPSSPSTRPDQLLSEPPEEPTLKKGDWVLEK  
IHDRTPLGPYRPAVQVISVKGTRTVVIPALPPKKRQVSIDHLKPAPDGYCNVS  
KGTTDSEMVTATTGHFLTSVNPHQPFWIPQYRTFDGPSLQIQVHTLSVIDESRL  
FT---NIPVSQMYRDMRLAKLVTFTQGAL-LD-PEDDIEDLHSLAEHICYVRYD  
TFLPIRWIN-HTHWEHCAAVPSTWG--GEHWQIRGDESLDACRPHLMYFLNY  
THYQTTCSFYPDWEMVDGLNGSKPITYASGIPVLWAVQANECNRRRFGAISIG  
KLCQAMSHTTHLSEVLSTIEAWGKNWTEINSSKRTKRTWKEVILAIQKTEQEA  
VKEGFKAADENFYQLQQGLYILRDVVT SVIGTLQHDL SAI RNDQQAASSLTLV  
SNFLDTLTRGVPDWTWTIHGILTMHRVEGQWIRSSYVVPYTHACVTHE DVRL  
YALVNCVGAARLQCQEVTRKNPCSQXCVLHADKMGTFSSKAHLLPNGSYVV  
QFNTSCCNIPKGVTTLITVTSTVKCCGYMLTPPVTLRLAELSKMKIIKSTAQTF  
EEAALLAATSSWGEALSALLQGFTSILSNITDWASSAISTAGKGVLG-LISTLAS  
LSPLFIAIGLLILFLLLR---

>exNFVtwe

KEEGGDVIFIVEANEAYQTEVTFPEEDEDSSVFNIPLAYQEHQDWFGGALPHV  
LEPVRLGPLGNDGPTW--PMYCTYTPLALRELYTEIVTLYRRLVQINTQTVNAI  
MGKVPTDREKIPFWIAQKTNQLEAVFPHTGPQDKHRLTMCLP--FGMVPSVD  
DCTTWYTTTHGTPTIANLPEVLKQIQNEHGAAPALDLGMKLM-CNFEAVSSIIL  
GNIKGEAVALAIRQLRETPH-LEKERQLPKIISRDSLGA KPKKTT SKEVT-KQA

QDNIRKRWEKEKDSHPENSERRYFLRNRDNIPKEDKAPQQKPQFKKKKVRS  
RGHDMSPESERSSAVTLLDSAAEVTICRQSLLDATAIAVETADGRVPDRVHKISI  
QIEGRTISALFWDE-LSDILLAIDWPPEHVRTLPGFSDLVPEAEKKAYAKEW  
ALYRNHVGWDRDSPSHVPIRSTPQPQPQYPIKHEARAPVKEILTQLEYQGVIE  
PCDSAMNNPLFPVAKPDHSYRIVLDYRHLNSHTRTFAIQNAHSTALINNIVRKK  
YKTTLDISNGFFCQNLAHESRDLSAFSF-GSQKRFCRLPQGYKNSPGLFSARVT  
SILHDIPEALSYVDDIYLTDDDLYIHLVRVDRIILGFANFGYKFNFRKSKIAFLSV  
LFLGYELSNEGKSLAPHFLEKCALLHPPNTLKKLQSLGFFNFGRTYIPDYAQR  
IKPLYDLIRFSGRHWTVEHTRILRDLQQDMLEAKHLHTRDNKTNLVIRIAGAI  
GFTYVTFNEGDTVPIAYKSHLYSNAEQRFAPTEKILTAVQMAVIKERPLAQGKR  
IIVVTPVPALEAVTKASVPAKALHPRWIQWATSLTSTDVEYIFDPKLQTQEFL  
QQEYPAPLDILPLDRYHTVIYTDGSAQPAVGTKHQYSAACAASVSGVMGAFR  
PQHTYTQTLGDCTAQLAELKALLALEHTER-GVLTIVCDSYYCVQSYNDYL  
GHWKVNFRDSSKNTIKHKILWGVADLKEKLPVHVHTLGHQR--IGIHAI  
GNSLADEAAKSAVVAVTRSRTRLDKEIELAVKAKLPKGYPTEDQRIDLIRTAH  
ASAHAGVQATITLLQQRFWWPGLYKGRQYVLCCDICQQIKGSNIKRPQTSL  
LVSNRPLQCVYLDHCGPLQQDGAYKYILVTVDSCSRFLWVWPQRSADARTVI  
KDLLIFIGTYAFAAFHSDQGPFAASKAFRDTMGTMGVELHYSSPYHPEGNSVV  
ERRNRDLKQSLTARVLGSGRSWLHHLVGVQRALNNLPRRSLGRTPYEVFLGIP  
MYVPDLSSASAATLGIGDS-PKSSTGWIPRVGDLVREKIAVKKEFGPSYRAPVP  
VLGIQGTRTVILPPLPGSKRFISMSSYTMWPILGTASSTRIPLTTGQAIINGHFLP  
ERSTVEIVWDRVPFDIYGPTTEVIQIPYVFKLSMNDVII---GVVSDDWVKTVD  
SMMTELQYHTV-FE-SEDVYQFKENYGDMFCYNYGHHFIASKTIFNYTQWE  
HCPSIDRDWQIQGKEALFR-----ACLIPVQMIFLNDTVQQTSCLRIPAPAKFDGR  
NG----TYNSSLSRPWPIDTNGCHKRFLNTYSVGKLCQQWLKSASLDAVKEHLN  
LLSN-NTDLPRRKRFLYSQQDAAARLRQIDQKNLQKALAVVDNMGMNILSDRIY  
TLNNIVSSAIDIIQSDVSSLHLGQDQIRSIMQLGWTLQTLKAGRVPWQWLIHG  
VIRYERLGDYSIHEVWELPKYKCLSGMKEVFLSGSECETSHSMICKQLSLHG  
ACNASCYLKGVVPVIRPVFQVLSNGSYVLLNSEDCGMRAGIVYIVSVSMIV  
TCCGNVLPPTSRLKALLFQKHVALTSASETYALQVHFGELVGRIFNASSTSKA  
VGSGFVHTFSSIFGLIPAAIHSIFSG-----GFPVTLAIGGILLLLFFLRNGC

>exNFVtgr

TDAGGICIMVISTSDIYTFEIEFPAVDANSGHFEIPLSLWEHVAWVFGALPHIIDPI  
RLGPLSNPGATW--PALAGYAPAQVVRLYTELVSLYRRLVQLSPVVIHSIMGSP  
TNREEIPFWLARKLDQLEAVYPFTSPQD-HWILTMCMP--YGMVPVIADCDSW  
YTICHGSPSLTVLPDVLKQVQNEHGAAAELGMRLM-RNFHVVSQMILANI  
KGEAAALAVSQHLEATAV-VDRERALPAIITRNLGDKPPKTIKQQVADKQPQA  
QNQKQTEPKKSPPPDTMEKTYDFRDRAKMPQEPVSPGTKPKFQHKKVRGR  
DYRSPPESTVPSAVTLLDSTAEITVARRTLLNVKAVAVETADRRVPDRIYELTIE  
V-----VFEHLLSDILLAKADWLPDFVRSAPRGFSSLVPDDLKQAYA---ALYR  
NHVWGWDESSPSHVPLCSSPQVQAQYPIKRDAKSQIKEILSQLEYQGVIEPCVS  
QMNNPLF-ILKLDQSYRIVLDYRLLNSHTRTFAIQNTHTALVNNIGRKEIKTTL  
DISNGFFSQNLAPESKDCTVFSALGFQKRFSRLPMGYKNSPGVFAARIISILHEI



PEALSYVDDIYLTDDDEIRPHLEGVSCIILRFASLGYKFNFKKSKIAYLSVFLGY  
ELSHAGKNLSPHFLEKCAELQAPNTLKKLQSLGFLNFGRTYIPDYAQRKPLY  
FFIKYSIRHWTSEHSAILRSLQSDLVAAQYLRTVNTNLVIRVLPANGFTYLT  
FNEGEKVQMAYKSHLYSPAEMRFAATEKILTAVQMAILKERALAQQKRLIVVS  
PVPALAVTKASVPAKALHPRWIQWAASLTAVDADFVFDPTLQTQEFLQHV  
YPVSHSLPLDHYQQIYTDGSAQPAIGSKQTYSAACATIMGVMVGVFSPQQT  
CTLSLGDCTAQLAELKALLVLMHADP-DLFTLMVTDSYCVRAYNDDLHY  
W--NDYHDSKGNLSKHLLWVKVTDKHLRPLTHVTHLGHQH--VGTHVVG  
NSMADEAAKSAVVAANTRSKMYIDADILAAIHAPLPKGFPSQAHRLELIRAAH  
ASAHAGVHATISLLQQRYWWQGLYRDARTFVATCDICQQIKVSTVARPPQTSL  
FISSKPFVCVYLDHCGPLESDSAFKYTLVAVDSCTRFLWVWPQRSADARTVSK  
DLQVFGTYACCVVHSDQGPFTSKAYRDAMDSLGVQVHYSSPYRPOGNSIV  
ERMNRDLKQSLTARVLGSGRSWLNLYLHGVQRCLNYLPRQYLGRTPYEVLFGF  
KMFVPDLSNEQLKIFQAANTASTVPSGWLPNIGDLVREKVAVKKEFVPSYRAP  
VPVLGVKVSRTVILPGLSGSKRCVSM-----  
-----  
-----

-----KIRAIQQNLNKVLNVIDNSMNTLSSRIYGLNDIVSSVLDVVND  
VSNLYQGQSQLKSLMNLWMLQKLREGKVPWTWLIHGLISYVPLGKGYLHE  
TWSFPFKYRCFRSDLEVLLSVSDCDDRHSVCTNINIHGTCNNSCVLKGTPVN  
EILPVARILYNGSTVLINDRCCAMQAGVAYMVTVSNALTCCDVALYPPTSRL  
KALLFHKEVRLTSASETFKLQV-----  
-----

>NviFLERV

-----DLLSVWNHNAWFGVQLPHTLRPIRLGPLNNGAT  
W--PTLAGFTPGEVALYEQVCQMYWILVQIGPVVNSLMGKKPVTREEYPY  
WLAEKIPQLEAVLPQCNPQDRHCILTMCLP--QGIVPTQAE---WYIIAHGEP  
SFAVLPEVLKQIQNHGAAAALDLGMRPL-ANFPVVSQMILRNIKDEAAALIR  
QQLMALPV-MQREVALPGIARNNLGNCPPKTLPEQPKEVQTKNKQNKQGGKTE  
QSQSSERSEKQYELRDRSRSPQEPSTSQGGPQRGG---RGRDYRYTLESTG  
HSA LAVLDSAAEITVI---LAATSVAVET-DTHVPDRIYNVKIQIEGRSIQAD  
NFT--STD ILLAEADWPPDFVRS---FSSLVDPNV-KAYAADWALYRNECGW  
DEESPSHVIP KRTSPQVQPYPIKREKASVKEILTHLENQDVIESCTSDMNN  
PLFPVAKPDHS YHIVLDYRHLNSHTRSFaiHNTHSSTLVNNLTRKkyKTTL  
GISN-FFTQNLAPES QDWSTFTCLGIQYKFWRLPMGYKNSLGVFAVRII  
ELLQLVPDAVSIDYIYVT DDEMQQHLARVDRIIHFSAAGYKINFKKSKIA  
FFSVLFLGYKLNNEGKSLAPH FLERCAVLQDPNTLTKLHSLNLFNFGRRY  
IPEYAQRKPLYSLIEYT--HWTDA HTDILRSLQRDLLEL-HLHTRDNT  
TNLEIRVSPSATGFTYMTFNEGDTVPMAYK SHLYSSVEMRFASTDFFTAV  
QMAILKERPLAQGKRIVVTPVPALEAVTKASV PNAKALHPRWIQWAASLT  
SVDVDFVFDTTLSQSEFLQEIYPQRPSVLPLDQYQ QIIYIDGSAQPAIG  
SKQAYS AACSTITGVMKG-FHPTKTRTMSLGDCTTQLAELT SLVLAL  
THAKQ-DILTIIISDSHYCVRAY-EDLHYWRLNNYRDSKGNIIKHKTL  
WVQVATFKGQLPQTHVVHTLGHQR--VGS HVVGN TLAATAAKSATVA  
AITRSQ

TKIDADILAAVHAPPPKGFPIKDRRLALIKAAHESAHVGVQATITLLQQQYWW  
KGLYKEARKYVLECDICQQIKTSTIVRPPQTSLFISDKPFGCAYLDRCGPLSSDT  
AYKYILVAVDSCSRFLWVWPQRSADARTVIKDLRV-LGTYACRTFHADQGPFAF  
ASKAYREALESLGVQIHYSPPYRPEGNSVVERMNRDLKQSLTLRVIGMGRDW  
LHHLYGVQMGLNNLPRQSCGRTPYDVLFGQSMFVPPVVSADTSSLAQSEETAP  
SIPVGWLPKKGDLVREKIAAKKEFGPSYRCPVPLGISGTRTVILPPLPGSTRFV  
S-----

-----TYSIGKLCQKWLKDSTSSAVKDHIATLSDLISDFPRSKRFAS---  
-----IYNEISDLENVFSSVIDIVQSDVSTFYHVQTQLRPILDFSW  
TLQTLKSGKVPWSWLIHGVISCTKIADSYIHEKWFLPFLYRCYSGEKEVFLSV  
RDCDSSHSLVCQEITVHGACTASCALRGLPVSFIAGKTHVLVNGSYVMLNEM  
DCCGMIAGIPYIVTVSHPVTC CGVLIFPPLSRLKALLFHKKVYLTTSSSEITNLP  
HFCELLHTISNASSKTKVVD SGVVSTFKAVVGIIPAAIHSLFSS-----FVPILLAI  
AAVVVLFLLRYGC

>ERV-Spuma-Smu

DVQNDEVLALEIQYGPWGS GIRVLLGPNQVVLQIVNLIYDESIILGRVPIPN  
LRRHGYPVQSE-RWGT PRSKLYSPVKREELPPLAATLQLEREQIPMSNIKATVG  
QVPSNTKEIPLWLNDR IHALDGVFPTPTPAQKEALINALLP--PGLSVTLQEAKD  
WYEKTHGKVTLASLADTLTQVHKSSGIVAAYSLGLRFTQNNHEIVWGCLKSLI  
RGQGLILDLERQIERLPK-EERCEKVPDVLKKDLTGEGAASN RQKADEKRKSV  
QFRARQSDSRREELRRQEPQNR YALRPFIRTPDRYGGPRQDARPRERSQEKTN  
EQMSSKMESLKYTGLLDTQADISLVQPNILQEEMVSVQTLEGE GSYPSFYTNL  
KINGKCVSLELVEHPLDQFLIAFKDVAHF IQITQSTEENKDKLALCLCDHFQVF  
QQWENQAGYRREILHHIATGTVTPKRQS QYKINHAAIPSIQIVDDLKQGIKE  
QYSQMNTAVYPVPKPN GSWRLVLDYREV NKVTPVVS AQNTHSVSILHGLVR  
KRFKTTLDLANGFW SHPIDTDSYWITAF TWQGKQYVWTRLPQGFVN SPALFT  
ADVVSLLSAFSNIEVYVDDIYLSHDSEEEHIAVLTQVLD TLYKAGYIVSLKKSQ  
IARNKVTFLGFDITHNGRGLSDNYKEKIAAIKRPCSLKQLRSIIGLFNYAMLFIP  
NFNILIAPLHAAVSKTPFQWNMKEEKALQDLLTAVNN-DYLTQREPTQPLSVY  
VSISSEAA YIRIYNSAEIVPIVLLSYVFTITERKYLPLEKLLTAVTVAVLKSRDLA  
QGQNIYIYTSVASLATLKKETIPEKRAFKCRWLKWLTLFEDPQLNFVYDATLP  
MLDDLPTLYNSEAQKHPTDFYTYLYYTDGS AVNSNKEGVNRSAGVGI--AKYS  
SDMSLLKTWQLPIGDHSSQYAEIYALVFALKEALSDKGPVLVVTDSAYLARS  
NEDLRIWRSNGFLTAKKKPLMHIAKWK AISAYLNYKPDIEIVHEPAHRKLGSS  
AHTLGNQLVDSL AQA VSYAVNQVK TASLDAELNACLDDPNPPGYPRKEERV  
IANKAHGHPHLGRDNVLQALKKKYWWPNMRKT VSYVVGNCCKPCLLVNPN  
HQKPPHIVKEIPNKPFDLIYLDHIGPLPPSHGYLYVLVCVDACTRFTWLYPVRA  
TNSNTTLSCLNFLVGAGKPKILHSDGGPAFTAVKTQEWALG IKWEFSSPYH  
PQSSGVVERKNAEIKRLLTKLLYSRPTQWYPLLPQVQLGINNIPASNSGKTPFE  
LMYGVP MNTDFVDSSISAPGRLEQLSPDTTHAWTPQVGHFVQERVSTIKPLRP  
RWKPPAEIKTVINERTFIIVDKQGRQRTVSIDNLKPVPLSGHFVMEEKPPLTYSQ  
WRPGITLTWNQTQILYWKPYPTPIVEKKKVLGISQVVLIDSNILAKTAGISDEG

RALVKLYLDDQMKKVQAVTLPYKLPLQDHRKQQTYREKMCYVSLGHICYFV  
RIWPTPEIKADQCPALPPEWQAKGQKKLFRSLTEWDICTMPRFPSFLNTSYFSH  
SCKAKGNPCGITYQIDQGFLHY-SGLPGFVCVQKSKFVKNTYTVYSLFQKCLT  
DSTIYDVETVIKGIQDKMNNIADMPYAEAVWGNNAEVSITTGHLLSDAVSIISH  
VSDANDEELKKKVLKKDHLIIFISAAMSDFTVLAEELRALMVLNKLTA MRLT  
LQGEQIDTTFLYYELIHLIDTADDDLALMQIKQPYDYISYKCGEHFYLKVEKCTE  
IGYLVCGEIYTVLPCGSDCEITVHPVVAPYTRIESLSNGSYLVLSSTSECNIPSM  
QPSIITVNTSVECFNIIFTPPLTAFLAHLKSMKIIKIHSSELLRIDIHEGDFPQWMQ  
NLGKALKSLWPGMGKAISAVGEGLGKMGNGIFGSILSIFGYLKPLLLLILGLFL  
FGVIWRLFS

>BFVbta

ALQHNDIIICRATSGPWGIGIRIHLQDPAGQPLPVVSAPMATLENILNNFHIPHG  
VSRYPLEGGDYQPGEQYSQGFCPVTQAEIEEEITILRERLMHLPITHIRAVIGE  
TPANIREVPLWLARAVPALQGVYPVQDAVMRSRTVNALTVRHPGLALEPLEC  
GSWWQRTFGATALHALGDTLGQIANS DGIVMAIELGLLFSDDNWDLVWGICR  
RFLPGQAVCVAVQARLDPLPDNATRIVMISHIIRLDPLGRPMLPRRNNQPPRGR  
QNAQTPRQEGNRLQNSQLPGNQPRYPLRPNPQQPQRNRNFSRGPAPVNEQSR  
GRGRSSQVEIKGNHLKGYWDSGAEITCVPAIYIIEEKKLITTIHNEKEHDVYYV  
EMKIEKRKVQCEVIATALDYVLVAPVDIPWYKPGSTLSPQGMRLKLLDQY  
QALWQCWENQVGHRRIEPHKIATGALKPRPQKQYHINPRAKADIQIVDDLRL  
QGVLRQQNSEMNTPVYPVPKADGRWRMVLDYREVNKVTPLVATQNCHSASI  
LNTLYRGPYKSTLDLANGFWAHPIKPEDYWITAFTWGGKTYCWTVLPQGFLN  
SPALFTADVVDILKDIPNVQVYVDDVYVSSATEQEHLDILETIFNRLSTAGYIVS  
LKKSKLAKETVEFLGFSISQNGRGLTDSYKQKLMDLQPPTTLRQLQSILGLINF  
ARNFLPNFAELVAPLYQLIPKACIPWTMDHTTQLKTIIQALNSTENLEERRPDV  
DLIMKVHISNTAGYIRFYNHGGQKPIAYNNALFTSTELKFTPTEKIMATIHKGL  
LKALDLSLGEIHVYSAIASMTKLQKTPLSERKALSIRWLKWQTYFEDPRIKF  
HHDATLPDLQNLPPQDTGKEMTIPLHYEAFYTDGSAIRSPKPNKTHSAGMG  
IIQAKFEPDFRIVHLWSFPLGDHTAQYAEIAAFEFAIRRATGIRGPVLIVTDSNYV  
AKSYNEELPYWESNGFVNNKKKTLKHISKWKAIAECKNLKADIHVIHEPGHQ  
PAEASPHAQGNALADKQAVSGSYK VFSNEKPSLDAELEQVLSTPNPQGYPNK  
ADRVKLCQLAHD SAHLGRSALLKLQKQYWWPRMHIDASRIVLNCTVCAQT  
NSTNQKPRPPLVIPHDTKPFQVWYMDYIGPLPPSNGYQHALVIVDAGTGFTWI  
YPTKAQTANATVKALHTLTGTAVPKVLHSDQGPAFTSSILADWAKDRGIQLEH  
SAPYHPQSSGKVERKNSEIKRLLTKLLAGRPTKWYPLIIVQLALNNTPNTRQ  
KYTPHQLMYGADCNLPFENLDTLDTREEQLAQTARSWTPSPGLLVQERVA  
RPAQLRPKWRKPTPIKKVLNERTVII-DHLGQDKVVSIDNLKPAALLQMNPKM  
ESSL-RIRCWSPGPILVWNN SRLRFLEPHPKPIISKERVGLSQQVVMVDSSTLTQ  
KLNLEGEAKSLLIKTINEELISLQDVVLNFDLPLGDPHTQEEYIAKRQYQHFHGH  
CYVVKEWPTREIIQDQCPALPGTWHTLGKGEWFRDLTTYDFCKKPEAVFGLN  
KTYYSWSCLFQPKWDSAEIRS DLGYLAYLGAFFSPICIEARNLTDQDYKVTSIY  
AECVKQKGKQYDIIDVTRQLTSKLVFLGDLPADRAFSLNNWRRLOITGQSMNQ  
AITLSKLSLDLNDENLAAGIHLQDHIVTLMEATLHDVSLLGHMSTIQHLHHTH

LATFKNLLIGNRVDWSVLYYELIHLTHNSGYLTHVTHHPYEIVNQDCEELTFL  
HLVDCHEQDYLICEEVMEVEPCGSDCPVLAENIQAPYVYLHPLKNGSYLLMA  
SHTDCSLPPYEPVVVTVNDSLECYGKPLKRPLVGIIAKLSLKIQRSEQELLR  
LDLHEGDYSWILQLGNALEDVWPVAASAVSTIGTLLEKAAGTLFGNVFSILA  
YAKPVIIGIILLLLIVIRILR

>EFVeca

AQADNDIINIRFTSGQWGIGVRLRLVDNTGQPLAVVAVSHNAARNIFNNVQPA  
GGPNRHGPHDGGQFQVGDDPSEHFVPIEENLIRREVLLRERLLHLPITHIRAVI  
GETPAQIRDVPLWLAQSIPALTGVYPAMDAGTLTRLVNAITARHPGLALGMNE  
AGSWWQRTFGATALHALSDVLKGIAQRNGVVMALMGLMFTNDDWDLTWS  
VIRRCLPGQASVVTIQARLDALPNNQARIQAGFIIRLDPLGRPLFPGGTLQRDT  
GNQPQTQPQQNTFSNQTNRGSRQRYFFRPRSPQQRRLPQQ--QQGSRRG  
PGRNTNSGVQIKGNSLKGFDYDTGAEITCVPAIFLIEEERTIQTIHGITKEKVVYL  
TFKIQRKLA AEVIGTQLDYVIIAPSDIPWYKKYTNLSSEGKKYLKDLFIKYDN  
LWQKWENQVGHRRITPHKIATGTLNPKPQKQYRINPKAKADIQIVDDLKQG  
VLKQQTSPMNTPVYPVPKPDGRWRMVL DYRAVNKVTPAIATQNCHSASLLN  
TLYRGQYKTTLDLANGFWAHPIQESDQWITSFTWNGKSYVWTTLPQGFLNSP  
ALFTADVVDLLKDIPNVEVYVDDVYFSNDTEEEHLKTMDLLFQKLQTAGYIV  
SLKSKLQHTVDFLGFQITQGRGLTDSYKSKLLDITPPNTLKQLQSILGLLN  
FARNFIPNYSELITPLYQLIPLAYIPWETKHTAILQKIIKELNASENLEQRKPDVE  
LIVKVHVSPTAGYIKFANKGSIKPIAYHNVVFSKTELKFTITEKVMTTIHKALL  
KAFDLAMGQPIWVYSPIHSMTRIQKTPITERKALSIRWLKWQTYFEDPRLIFH  
YDDTLPDLQNLPTTLGNEVDIPLSEYEVVYFDGSSIKSPKKDKQHSAGMGI  
IAVRYQPQMNIQEWSIPLGDHTAQFAEIAAFEFALKQAIRKMGVPLIVTDSY  
VAKSYNQELDFWVSNVNNKKKPLKHVSKWKSIAADCKKHKADIVIHHEPG  
HQNDLQSPYAMGNNAADKLAVKASYTVFSVQLPSLDAELHQLLDKPNPKGY  
PSKDDRKILELAHKSGLGKNTMYIKILNKYWWPNLIKDISKYIRTCTNCIIT  
NTDNVPNKSYIVQEKTGLPFQKYMDYIGPLPPSDGYYHVLVIVDEGTGYTW  
LYPTKAQTANATVKALNHLTGTAPKVLHSDQGSFTSATLVAWAKDKGIQME  
YSSPYHPQSSGKVERKNSEIKRLLTKLLVGRPTKWyPLIPTVQLALNTPNAKI  
GKTPHQLMYGVDCNLPFQDLSTLDTREEQLA-----KWTPCPGLLVQERVNRP  
AQLRPKWKKPTPILKVLNPKTVVIAGPGGQERIVSIDNLKKTPIREAIQVQIPL  
-CLRIWVPGPVLFWNHTRLRFLEFPKPIIDKERVLGISQIVMIDSGSIAQSMNL  
DLYMKHLLVDMINEEMVALSNVLPFELPVGDPSTQDQYIHKRCYQQFAHCY  
IVRVWPTSEIIQDQCPALPPTWTPKGQARLFRELNPLDFCTKPEAVMLLNQSY  
TWSCLFYPKYDQFELANDFGFLAYQKMFPSPICIQNYSLSTEPYKVQSLYQECI  
QKGTSYDLEDVINQLLRVLIDLGVASRAFTPDNFRKLQTSGLSMNQAISTL  
AKISDLNDENLAAGIHLQEHIVTLMEATVHDISMLEAAHGLQILHHLSTLRL  
LLTENRVDWNLIYYELIHLIKNAGHLARVELQHPYEIVNQDCEQLTYLELKG  
QELDYLVC EILQHEPCGSDCPVTAQKIKDPYVWIYPLKNGSYLIMSSHTDCAI  
PPYEPVLVTVNDTVRCFGTTLKPLVGLIAKIKGLKIEIRSEAE LLRLDLHEGD  
YAEWTKQLGKALEDIWPAAAQTVSKIGDFLGKIADGIFGTTFSLTYAKPVIIGI  
VVIVLLILIRILS

>FFVfca

ARGHGDIIAVRFTGGPWGPGVTIRLQDNTGQPLQLIAGPYNLIRTAFLDLEPAR  
GPERHGPFGDGRLLQPGDGLSEGFQIPITDEEIRNEIRLLRERLQVIPINHLRSVIG  
NTPPNPRDVALWLGRSTAAIEGVFPIVDQVTRMRVVNALVASHPGLTLTENEAE  
GSWWRKAHGAAAQHELAVLSDINKKEGIQTAFNLGMQFTDGNWSLVWGII  
RTLLPGQALVTNAQSQFDLMGDDIQRAENFPRVINLNIHGQSIRPRVQTQPLQR  
QQQQHSDVPEQRDQRGPSQPPSGGGYNFRRNPPQQRGPRPGGNPRGGGRG  
QGPRNGGGSVERKGVKIKGYWDSQADITCVPKDLLQGEQQNVTTIHGTQEG  
DVYYVNLKIDGRRINTEVIGTTLDYAITPGDVPWILKKSILSKKGKEELKQLFE  
KYSALWQSWENQVGHRRIRPHKIATGTVKPTPQKQYHINPKAKPDIQIVINDL  
LKQGVLIQKESTMNTPVYPVPKPNGRWRMVLDRYAVNKVTPLIQVQNHQSY  
GILGSLFKGRYKTTIDLSNGFWAHPVPEDYWITAFWQGKQYCWTVLPQGFL  
NSPGLFTGDVVDLLQGIPNVEVYVDDVYISHDSEKEHLEYLDILFNRLKEAGY  
IISLKKSNIANISVDFLGFQITNEGRGLTDTFKEKLENITAPTTLKQLQSILGLLN  
FARNFIPDFTELIAPLYALIPKSYVPWQIEHSTTLETITLKLNGAEYLQGRKGDK  
TLIMKVNASYTTGYIRYYNEGEKKPISYVSIVFSKTELKFTTELEKLLTTVHKGL  
LKALDLSMGQNIHVYSPIVSMQNIQKTPQTAKKALASRWLSWLSYLEDPRIRF  
FYDPQMPALKDLPAVDTGKDNKKHPSNFQHIFYTDGSAITSPTKEGHLNAGM  
GIVYFINKDNLQKQQEWSISLGNHTAQFAEIAAFEFALKKCLPLGGNILVVTDS  
NYVAKAYNEELDVWASNGFVNNRKKPLKHISKWKSVAIDLKRLRPDVVVTHE  
PGHQKLDSSPHAYGNNLADQLATQASFKVHMTKNPKLDIEQIKAIQARLPVG  
YPKQRERYKLIKEAHNISHAGREAVLLKIQENYWWPKMKKDISSFLSTCNVC  
KMNPNLNLKPISPQAIHVHTKPFDFKDYMDYIGPLPPSEGYVHVLVVVDAATGF  
TWLYPTKAQTSKATIKVLNHLTGLAIPKVLHSDQGSFTSEEFAQWAKERNIQ  
LEFSTPYHPQSSGKVERKNSEIKLLTKLLVGRPLKWYNLISSVQLALNNTHV  
VSTKYTPHQLMFGIDCNLFPANKDTLDWTREEELAPTCS-GWSPYVGGQLVQE  
RVYRPSQLRPKWRKPTKVLEILNPRTVIIVDHLGQRKSVSIDNLKPTALQSTHP  
ELHVPL-KMRMWHPGPVLSWQVTRRRFFAPQPKPIFHKERTLGLSQVILIDSDT  
ITQ----IKQQKAYLVSTINEEMEQLQKTVLPDFLPIKDPLTQKEYIEKRCFQKYG  
HCYVIKVVWPSQDLIQDQCPAFPKELSPVGSFMLFRPINPYDICNMPRAVLLLN  
KTYTYTFCYYRPLYDGTENTEDWGWLAYTDSFSPICIEEKRIWKKNYTLSSV  
LAECVNQAMEYGIDEVLSKLDLIFGNLTHQSADEAFIPENLRRIQEAGLGLAN  
AITTVAKISDLNDQKLAAGVHLLRDHVVTLMEANLDDIVSLGEGIQIEHIHNNH  
LTSLKLLTLENRIDWRFIYYEIIHLVRNAGYLSKVWVIQQPFVNLNQECCGTNIYL  
HMEECVDDQDYIICEEVMELPPCGSDCPVLTPLTDEYLEIEPLKNGSYLVLSST  
TDCGIPAYVPVVITVNDTISCFDKEFKRPLTSLIAKIKGIQIEIRAKAELLRLDLH  
EGDYPEWLQLLGEATKDVWPTISNFVSGIGNFIKDTAGGIFGTAFSFLGYVKPV  
LLGFVIIIFCIIIIKIIG

>SFVmcy

AARHREVIALRMTGGWWGPAVSLLLQDDQGQPLPTLEAPWQDLRLAFDNID  
VGEGTLRFGLANGNYIPGDEFSLFLPPAMQEIDAQIRGLEGLRVIPIQHIRA  
VTGNAPSNPREIPMWIGRNASAIIEGVFPIPTSDIRSRVINALLGRQLGLNLDPQH  
CITWYVRTHGSYPLHQLAEVLRVSNSEGA AAAWQLGMMLTNQDYNLVWG

MVRPLLPGQAVVTAMQHRLDQEVSDAARIVSFVNHLNLNARGQNLRVSTGG  
QTTARSSQGGQPRQSESGDQNNQRQLNRGGYNLRPRTYQPQRSRTSGAGREQ  
GGRGNQNRNQRSAAEIKGTKLKAHWDSGATITCVPEAFLEDETMLIKTIHGE  
KQQDVYYLTFKVQGRKVEAEVLAOPYDYILLNPSDVPWLMKKTALPKEQKE  
LLQKLFLKYDALWQHWENQVGHRRIKPHNIATGTLAPRPQKQYPINPKAKPSI  
QIVIDDLLKQGVLIQQNSTMNTPVYVPKPDGKWRMVLVDYREVNKTIPLIAA  
QNQHSAGILSSIYRGKYKTTLDLTNGFWAHPITPESYWLTAFTWQKQYCWT  
RLPQGFLNSPALFTADVVDLLKEIPNVQAYVDDIYISHDDPQEHLEQLEKIFSIL  
LNAGYVVSLKKSEIAQREVEFLGFNITKEGRGLTDTFKQKLLNITPPKDLKQL  
QSILGLLNFARNFIPNYSELVKPLYTIVANAFISWTEDNSNQLQHIISVLNQADN  
LEERNPETRLIIVNSSPSAGYIRYYNEGSKRPIMYVNYIFSKAEAKFTQTEKLL  
TTMHKGLIKAMDLMGQEILVYSPIVSMTKIQRTPPERKALPVRWITWMTY  
LEDPRIQFHDKSLPELQQIPNVTEVIAKTHPSEFAMVFYTDGSAIKHPDVNK  
SHSAGMGIAQVQFIPEYKIVHQWSIPLGDHTAQLAEIAAVEFACKKALKISGPV  
LIVTDSFYVAESANKELPYWKSNGFLNNKKKPLRHVSKWKSIAECLQLKPDIII  
MHEKGGHQQPMTTLHTEGNNLADKLATQGSYVVHCNTTPSLDAELDQLLQGH  
YPPGYPKQADREKIISTAHNIAHTGRDATFLKVSSKYWWPNLRKDVVKSIRQC  
KQCLVTNATNLTSPILRPVKPLKPFDFYIDYIGPLPPSNGYLHVLVVVDSMT  
GFVWLYPTKAPSTSATVKALNMLTSIAIPKVLHSDQGAFTSSTFADWAKEKG  
IQLEFSTPYHPQSSGKVERKNSDIKRLTKLLIGRPAKWDLLPVVQLALNNSY  
SPSSKYTPHQLLFGVDSNTPFANSDTLDSREEELSPASSRSWSPVGLVQER  
VARPASLRPRWHKPTAILEVNPRTVIILDHLGNRRTVSVDNLKLTAVTTLTEE  
QKQPTRMDKLWVFGPVIDWNVRSILYVPHPEPIILKERILGLSQVMMINSENI  
ANTANLTQETKULLADMINEEMNDLANQMIDFEIPLGDPRDQKQYQHOKCFQ  
EFAHCYLVKGWPSSTVIADQCPAMPAEWKQGGKADLFRQINTLDVCNRPEM  
VLLNSSYYEFSCLYYPQWDTPALYDFGFLAYLNSFPSPICIKNQTIREPEYKI  
SSLYLECMNASDRHGIDSALLALKTFLQSVNEMPLARAFVGNNYERLRSMGY  
ALTGAVQTLQSISDINDERLQHGVYLLRDHVVTLMEAALHDVSIMEGMLAIQ  
HVHHTLNHLKTMLLMRKIDWTFIYYEIVHLLSAGHLTHVKVKHPYEIINKEC  
SDTQYLHLEECIREDYVICDIVQIVQPCGSDCPVTALKVKTPYIQVSPLKNGSY  
LVLSSTKDCSIPAYVPSVVTVNETVKCFGVEFHKPLTGIIASLQSLIEVRAKAQ  
LLRLDIHEGDFPDWLKQVASATRDVWPAAASFIQGVGNFLSNTAQGIFGSAVS  
LLFYAKPILIGIGVILLIALLFKIIS

>SFVcae

ALNHREVIGLRMLGGWWGPGVSIFLQDDSGQPLQTIEAPWGELRQAFEDLDV  
AEGTLRFGLANGNWIPGDEYSMEFQPPLAQEIDAQIRGLERRIQAIPQHIRAV  
TGNTPTNPRDIPMWLGRHSAIEGVFPMTPDLRCRVVNALIGGSLGLSLEPIH  
CVNWYVRTHGSYPIHELANVLRAVVTQEGVATGFQLGIMLSNQDYNLVWGIL  
RPLLPGQAVVTAMQQRLDQEVNDAARITSFNGHLNLNARGQSIRAQSASTSG  
NRTNQQGNQGQR-----DNNQRQSGGGYDLRPRTYQPQRSRTSGAGRGQQGRG  
NQNRNQRRAAEIKGTKLKAHWDSGATITCVPQAFLEENIWIKTIHGEKEQPV  
YYLTFKIQGRKVEAEVISSPYDYILVSPSDIPWLMKKTMLTGSYKEKLQSLFLK  
YDALWQHWENQVGHRRIKPHHIATGTVNPRPQKQYPINPKAKASIQTVINDL

LKQGVLIQQNSIMNTPVYPVPKPDGKWRMVLDYREVNKTIPLIAAQNQHSAG  
ILSSIFRGKYKTTLDLSNGFWAHSITPESYWLTAFWLGQQYCWTRLPOGFLN  
SPALFTADVVDLLKEVPNVQVYVDDIYISHDDPREHLEQLEKVFSLLLNAGYV  
VSLKKSEIAQHEVEFLGFNITKEGRGLTETFKQKLLNITPPRDLKQLQSILGLL  
FARNFIPNFSELVKPLYNIIATAYITWTTDNSQQLQNIISMLNSAENLEERNPEVR  
LIMKVNTSPSAGYIRFYNEFAKRPIMYLNYYVYTKAEVKFTNTEKLLTTIHKGLI  
KALDLGMGQEILVYSPIVSMTKIQKTPLPERKALPIRWITWMSYLEDPRIQFHY  
DKTLPQLQVPTVTDIIAKIHPSEFSMVFYTDGSAIKHPNVNKS HNAGMGIA  
QVQFKPEFTVINTWSIPLGDHTAQLAEVA AVEFACKKALKIDGPVLIVTDSFYV  
AESVNKELPYWQSNNGFFNKKKPLKHVSKWKSADCIQLKPDIIIIHEKGHP  
TASTFHTEGNNLADKLATQGSYVVNINTTPSLDAELDQLLQGGYQPKGFPKHS  
DRPQIILQAHNIAHTGRDSTFLKVSSKYWWPNLRKDVVKVIRQCKQCLVTNA  
ATLAAPPILRPERPVKPFDFIDYIGPLPPSNGYLVHVLVVVDSMTGFVWLYPT  
KAPSTSATVKALNMLTSIAVPKVIHSDQGA AFTSATFADWAKNKGIQLEFSTPY  
HPQSSGKVERKNSDIKRLTKLLVGRPAK WYDLLPVVQLALNNSYSPSSKYTP  
HQLLFGIDSNTPFANSDTLDLSREEELSPASIRAWSPSVGQLVQERVARPASLRP  
RWHKPTPVLEVINPRAVVILDHLGNRRTVSVDNLKLTAISSLTEEQKQPTRMD  
RVWVFGPVIDWNVTRSLMYTPHPEPIILKERVLGISQVLMINSENIANVANLSQ  
ETKVLLTDMINEELQDLSNQMIDFELPLGDPRDQDQYIHHKCYQEFACYLVS  
PWISEGIIVDQCPALPKEWNNQGNARLFRSFNPLDVCNRPEAVLLLNTTYFTY  
SCLYYSEYSSPEAQDFGFLSYLNAFPGLKYIENQTVREPEYEVYSLYMECMN  
SAEKYGIDSVLFAKFTLTPVNEMSTARAFVGTNIEKLRSMGYSLTGAVQTLS  
QISDINDERLQQGVSLLRDHVVTLM EAAALHDITIMEGMLAIQHVHTHLNLK  
TILLMRKIDWTFIYYEITHLVESAGHLTLIRVKHPYEVINKECTYEQYLHLEDCI  
SQDYVICDTVQIVSPCGSDCPVTAEKVKEPYVQVSALKNGSYLVLTSTRDCSIP  
AYVPSIVTVNETVKCFGVEFHKPLVGIIANLQNL EIEVRAKSQLLRLDIHEGDF  
PAWIQQLASATRDVWPAAARALQGIGNVLSNTAQGIFGTTVSILSYAKPILIGIG  
VILLIAFLFKIVS

>EFVpve

ASLHGEIIGLRLTEGWGQLVRLILQDEDNEPLQVLSGPLAELQLAFQDLDP  
EGPLRFGPLANGHYVEGDPYSRSYRPVTMAETE VETRALRRQLAVIQHIRS  
VTGEPNPREIPIWLGRNAPAI DGVFPTTTPDLRCRIINALLGGNLGLSLTPGD  
CITWFIRTYGQYPLHQLGNVLKGIADQEGVATAYTLGMMLSGQNYQLVSGIIR  
GYLPGQAVVTAMQQRLDQEIDDQTRAETFIQHLNLNARGQSIRASVTPQPRPN  
SGRGRQCPAGQNDRGSNIQNSQGGYNLRSRTYQPQRSQTYKPAAGRGRGN  
QNRNQRSSAEVKGTKLLAHWDSGATITCIPESFLEDEQTLIKTIHGEKQQNVY  
YLTFKVKGRKVEAEVIASPYEYILLSPTDVPWLTQQTALPEEQKQQLKALFTK  
YDNLWQHWENQV GHRKIRPHNIATGDYPPRPQKQYPINPKAKPSIQIVDDL  
KQGVLTQPQNSTMNTPVYPVPKPDGRWRMVLDYREVNKTIPLTAAQNQHSAGI  
LATIVRQKYKTTLDLANGFWAHPITPDSYWLTAFWQGGKQYCWTRLPOGFLN  
SPALFTADAVDLLKEVPNVQVYVDDIYLSHDNPHEHIQQLEKVFQILLQAGYV  
VSLKKSEIGQRTVEFLGFNITKEGRGLTDTFKTKLLNVTPPKDLKQLQSILGLL  
NFARNFIPNFAELVQTLYNLIASSYIEWTEDNTKQLNKVIEALNTASNLEERLP

DQRLVIKVNTPSAGYVRYYNESGKKPIMYLNIVFSKAELKFSMLEKLLTMM  
HKALIKAMDLMGQEILVYSPVSMTKIQKTPLPERKALPIRWITWMTYLEDP  
RIQFHYDKTLPELKHIPDVYTSSIPPLHPSQYEGVFCTDGSIAKSPDPTKSNNAG  
MGIVHAIYNPEYKILNQWSIPLGHHTAQMAEIAAVEFACKKALKVPGPVLVIT  
DSFYVAESANKELPYWKSNGFVNNKKEPLKHISKWKSIAECLSIKPDITIQHEK  
GHQPINTSIHTEGNALADKLATQGSYVVNCNTKPNLDAELDQLLQGNNVKG  
YPKQSDRQKIVLQAHNLAHTGREATLLKIANLYWWPNMRKDVVKQLGRCK  
QCLITNASNKTSGPILRPDRPQKPFDKFFIDYIGPLPPSQGYLYVLVIVDGMTGF  
TWLYPTKAPSTSATVKS LNVLTSIAIPKVIHSDQGAAFTSSTFAEWAKERGIHLE  
FSTPYHPQSSGKVERKNSDIKRLTKLLVGRPTK WYDLLPVVQLALNNTYSPV  
LKYPHQQLLFGIDSNTPFANQD TLDL TREEELSPASSRSWSPVVGQLVQERVAR  
PASLRPRWHKPSTVLEVLNPRTVVILDHLGNNRTV SIDNLKPTSSTTVTDQOK  
EPTRKDKI WV LGPVIDWNVTRSLY YEPHPEPIV VTERVLGLS QVLMINSENIAN  
NANLTQEVKLLAEVVNEEMQSLSDVMIDFEIPLGDPRDQEYIHRKCYQEF  
AHCYLVKSWPTEGLIADQCPALPK EWSSQGKNALFKEINVLDVCSKPELVILL  
NTSYYSFSCLYYPYQDSLESTYDFGFLAYQKNFPAPICIEQQEIRDKDYEVYSL  
YQECKLASKVHGIDTVL FSLKNFLRPVNEMP NARAFVGN NYAKL KSMGYALT  
GAVQTL SQISDINDENLQQGIYLLRDHVITLMEATLHDISVMEGMFAVQHLHT  
HLNHLKTMLLERRIDWTYMYE LTHLVQSAGQLTHVTIAHPYEIINKECTETK  
YLHLKDCRRQDYVICDVVEIVQPCGSDCPVWAEAVKEPFVQVNPLKNGSYLV  
LASSTDCQIPPYVPSIVTVNETTSCYGLNFKKPLVGI IAKIKGLKIEVRAKAELL  
RLDIHEGDTPAWIQQLAAATKDVWPAAASALQGIGNFLSGAAHGIFGTAFSLL  
GYLKPI LIGVGVILLIILIFKIVS

>SFVggo

ASMHQEII GLRMTEGWGQMTRLILQDDDGEPLQVISGTLAELRLAFLELDL  
PEGALRYGPLANGHYIQGDPYSLSYRPVTMAETEVEVRALRRQLAVIPIQHIR  
AVTGEPPRNPREIPIWLGRNAPAIEGVFPVNSPEVRCRVINAIIGGNLGLALTPT  
ECATWFIRTHGTYPMHQLGNVIK GIVDQEGVATGYTLGMMLSGQNFPLVYGII  
RGFLPGQAVVTAIQRLDQEVDDQTRSDTFIQHPNLNARGQSIRTGANSTPRP  
GAGRGRQRSDGNLQDNNPSSQNNQRGYNLRPTYQPARSRAPRSGASRGR  
GNQNRNRPSAEVKGNKLI AHWDSGASITCIPESFLEEEKTIKTIHGQKEQKV  
YYLTFKVNGRKVEAEVIASPYDYILLSPMDVPWL VQKTALSEEFKKQLQTLFL  
KYDNLWQHWENQVCHRKIRPHNIATGDYPPRPQKQYPINPKARSSIQVVIDDL  
LKQGVLVQQNSTMNTPVYPIPKPDGRWGMVLDYREVNKTIPLIAAQNHSA  
GILATIVRKKYKTTLVLANGFWAHPITPESYWLTAFIWQ GKQYCWTRL PQGFL  
NSPALFTADVVDLLKEISNVQAYVDDIYLSHDDPQEHL DQLEKVFQILLQAGY  
VVSLKKSEVAQKTVEFLGFNITKEGRGLTEAFKAKLLDITPPKDLKQLQSILGL  
LNFARNFILNFAELVKPLYSLISSAYIEWSNENTVQLQTIKALNNADNLEERIPE  
KRLIKVNTPSAGYVRYYNETGKKPIMYLNIVFSKAELKFTLLEKLLTMMHK  
ALIKAMDLMGQEILVYSPVSMTKIQKTPIPERKALPIRWITWMTYLEDPRIQ  
FHYDKTLPELKNIPDVL TENS SKIHPSQYNSVFYTDGSAIRSPDPTKSHNAGMG  
IVQVKFSP ELQVINQWSIPLGNHTAQMAEIAAVEFACKKALKITGPVLIITDSFY  
VAESTNKELPYWKSNGFVNNK KPLKHVSKWKSIAECLSLKPDITIQHERGH



QPIYTSIHTEGNALADKLATQGSYVVNNNDKPNLDAELDHLIQGKYPKGYPK  
QLERAGIVQKAHNLAHTGREATLLKIANLYWWPNMRKDVVRQLGRCQQCLV  
TNAFNQTSGPILRPTPLKPFDKFFIDYIGPLPPSNGYLHVLVVVDVSDMTGFTWL  
YPTKAPTTNATVKALNVLTSIAVPKVIHSDQGAFTSSTFADWAKERGIQLEFS  
TPYHPQSSGKVERKNSDIKRLTKLLVGRPTKWDLLPVVQLALNNSYSPSLK  
HTPHQLLFGIDSNTPFANQDTLDTREEELSPASTRSWSPIGGQIVQERVPRPAS  
LRPRWHKPSRIVDILNERTVVIVDHLGNNRTV SIDNLKLTSTLVTEEQKEPTR  
MDRVVVLGPVIDWNVTRALFYQPHPEPIIHTERVLGLSQVLMINSENVANSAN  
LSQETKVLLTEMINEEMQSLSDVMIDFEIPLGDPRDQEQYIHRKCYQEFACY  
LVQPWPNEGLVDQCPALPYEWAKGGLNRLFRNISVLDVCSRPEMVLLLNKT  
YYTFSCLYYPEYSNPEALDFDFGLSYMKNFPGPQCIESTVIRQQDYEVYSLYQE  
CKLASKIHGIDSVLFSKLNFLKPVNEMP NARAFVGNNSKLRSMGYALTGAV  
QTLAQISDINDQNLQQGIYLLRDHIVTLMEATLHDISIMEGMFAVQHVHHLN  
HLRTMLMERRIDWTYMYEELIHLIKSAGQLTHVTVSHPYEIINRECSNTLYLH  
LEECRRLDYVICDVVKIVQPCGSDCPVWAEPVKEPHVQISPLKSGSYLVLASST  
DCQIPPYVPSVVTVNETTQCFGVTFKKPLVGIKIKGKIEVRAKAELLRLDIH  
EGDTPAWIRQLAAATEDVWPAAASALKGIGNFLTGAAQGLFGTAFSILGYLKP  
ILIGIGIILVILIFKILR

>SFVppy

AARHLETIGLRMLGGWWGEQARIILQDDDGEPLQVISAPWDQLRRAFHDLD  
VGNGALRFGPLANGNYIPEDPYSTSYRPVNPQEMTIEIRGLRQELQVIPIQHIR  
AVTGEVPNNPRDIPMWIGRNAPAIEGVYPVTPDLRARIINALIGGKSGIHLTAP  
EAVTWFRTRTHGSFPMHNLSAILTGIANGEGVESAYNLGMMLSNGDFNLVYGI  
VRGLLPGQAAVAYMQQRDAEPSDALRAQNFHQHLHLNHRGQSIRTSLPTSTR  
P-SGRGLSTPNRGSNNANNNTQSSFGGYNLRPNTFRPQRSRGPGGGGRAGGR  
RNQNRNSGQGAEVKGTCLKAHWDSGTTITCIPTVFLTDEDVLIKTIHGERRQP  
AYYLTFKINGRKVQAEVIASPYDYILLCPADV PWLQQQTALEGQFKQQLQNIL  
STFDTLWQHWENQVGHKIPPHNIATGTHPPRPQKQYPINPKAKESIQIVINDL  
LKQGVLIQQNSIMNTPVYPVPKPDGRWRMVL DYREVNKTIPLIAAQNQHSAG  
ILASIYRGTYKTTLDLANGFWAHPITPNSYWLTAFTWQGKQHCWTRLPPQGF  
NSPALFTADVVDLMKHIPNVQVYVDDLYLSHDDPQEHLQVLQQVLHILHDAG  
YVVSLKKSIAIAQKVVEFLGFNITKTGRGLTDAFKEKLLNISPPQNLKQLQSILG  
LMNFARNFIPNYAERVKPFYSLISTANILW NDELTSQLQELITLLNQADNLEER  
KPTTRLIIKVNSSSHAGYIRYYNEGSKKPILYINYVFSKAEEKFSMLEKLLTTLH  
KALIKAVDLAMGTEIMVYSPIVSMTKIQKTPLPERKALPVRWITWMTYLEDPR  
ITFHDKTLPELKDVPVSYQNDIPIVHPSQYSMVFYTDGSAIKNPNTKTHSAG  
MGVVQGKFNPEFQVNVQWSIPLGNHTAQLAEVAAVEFACKQALKITGPVLIIT  
DSFYVAESANKELPYWKSNGFVNNKKKPLKHVSKWKSADCLSLKTGITIKH  
EKGHQPSHTSVHTEGNALADKLATQGSYVVNNIIPSLDAELDQVLQGNLKP  
GYPKHADRKLLASQAHLKLSHSGREATLLKLSNTYWWPNMRKDVVKVIGQC  
QQCLVTNPSNLTSGPILRPERPTKPFDKFFIDYIGPLPPSNGYLHVLVVVDAMT  
GFVWLYPTKAPSANATVKALNMLTSIAVPKVIHSDQGAFTSSTFADWAKEK  
GIHLEYSTPYHPQSSGKVERKNSDIKRLTKLLVGRPTKWDLLSTVQLALNN

AYSPILKHTPHQLLFGVDANIPFANQDTLDTREEELSPASSRSWTPAVGLLVQ  
ERVARPASLRPRWHKPVKILEVLNPRTVVILDHLGNNRTVSVDNLKLTATTAVS  
EEEKEPTKVDRVWVYGPVIDWNISRSIYYEPHPEPIIVKERVGLGSQVIMINSET  
VANSANLTQEAKVLLADMVNEELQGLADVMIDFEIPLGDPRDQDQYIHRKCF  
QEFACVYLVKGWVSEKLIQVCPALPPSWSTEGKSLLFREANTLDICNIPEAIL  
LLNTTYYNFSCLYFPKWDTAEELYDFGFLAYLGHFSPICIKEHKIKEVKYSVY  
SLYQECINKASTYGIGNVVEGIKELLTPVNEPNARAFVGNVYVKLRSMGYS  
LTGAVQTLISKISDINDENLQQGLYLLRDHLVTLMEATLHDISLMEGMLAVQHL  
HTHLNHFKTMLLERRIDWTFIYYEIIHLIHSAGQLTHVTIDHPYEILNRECEETK  
YLHLEQCIKQDYVICDIVERVQPCGTDCAVYAKAIKSPYTEILPLKNGSYLVLS  
DSTSCNILPYIPSIVTVNETVECFGVLFKKPLLGHIAKLKNIKIEVRAKAELLRLD  
IHEGDSPAWIKQLAAATEDVWPTLATGLKSIGNFLSDAAQGIFGTAFGILGYVK  
PILIGVGIILLIVVIFKIIS

>SFVcja

AQRNGQTYAIAMTEGWGDIRVVFQDTSGNPLSVVGCTFNQASRVFDQIDI  
GEGPSRFGPLADGMFLITDNAWMDVFPLSAMEIQRENRLNTNLRVLPISQIK  
AVIGETPTDHKAVPLWVAKHAAAIEGVFPTGSPEVRCRVLNSLLTGHGGMML  
HPVDCVSWFQRVHG VVPLHQLPKTLEEVAKTEGLLVAYNIGMTFTSNNFDLI  
WGIIRPLVPGQA AVAMLQGYLDQYPRPQDKIEHFPRFLRLNFLGQSIRSTQAPS  
RPNPGRGTATPQAAGTSRSSSGSFGEQPRYNLRPQVNRPSRSSTPRGQGRSGR  
QRNNNARQNQVEVKKTELNGFWDTGAQITCIPEAFLKEEEAQIKTLHGTKLQ  
SVYYLKFVLRKVEAEVTTSPFDYVIISPDIPWYKPKANINNEEKQLAKL  
LDKYDVLWQQWENQVGRKIPPHNIATGTVAPRPQRQYHINTKAKPSIQQVI  
DDLKQGVLIKQTSVMNTPIYPVPKPDGKWRMVL DYRAVNKT VPLIGAQNQ  
HSLGILTNLVRQKYKSTIDLSNGFWAHPITKDSQWITAFTWEGKQHVWTRLPQ  
GFLNSPALFTADVVDLLKNIPGISVYVDDIYFSTETVSEHLKILEKVFKILLEAG  
YIVSLKKSALLRYEVTFLGFSITQTGRGLTSEFKDKIQNITSPRTLKELQSILGLF  
NFARNFVPNFSEIIKPLYSLISTANIKWTSEHTRYLEEIVSALNHAGNLEQRDNE  
SPLVVKLNASPKTGYIRYYNKGQKPIAYASHVFTNTELKFTPLEKLLVTMHK  
ALIKAIDLALGQPIEVYSPIISMQLKQKTPLPERKALSTRWITWLSYLEDPRITF  
YYDKTLPDLKNVPETVTDKPKMPIIEYAAVFYTDGSAIRSPDKNKSHSSGMG  
IVHAVFKPELTIEHQWSIPLGDHTAQYAEISAVEFACKKANNISGPVLIVTDSY  
VARSVNEELPFWRNSNGFVNKKKPLKHISKWKNISDSLLLKRDIIVHEPGHKP  
SYTSIHTQGNNLADKLATQGSYTVNNIVNPSLDAELEQLINGHSVKGYPSRSD  
RLALVKIAHEFSHAGREATVLRQLQDKYWWPNMRKDVISHIRTCKPCLTTDGS  
NLTPIPKPKQLRPEKPFDFIDYIGPLPPSHGFVYVLVVVDAATGFTWLYPTKA  
PSTNATITSLNILLGTAVPRVLHSDQGSFTSSTFADWAKEKGIQLEFSTPYHPQ  
SSGMVERKNREIKRLITKLLVGRPTKWYPLLPTIQLALNNTYSVHYKKTPHQL  
LFGVDGNVPFANQDTLDTREEELSPASKRAWLPSVGLLVQERVARPSQLRPK  
WKKPTPILEVVNDRTVVILDNQQQRRTVSIDNLKLTPLTGITPDQKKPTIQRL  
WTPGPVIDWNSTRDLILLPHPKPIIQKNRVLGLSQILLINSESLASIFNIKQEHKSI  
LTEIIQEEMRSLQDITLNFDPIGNPKTQHEYIQSRCFQEFKDCYLVKPWPTDD  
VLADMCPALPAEWNTQGQNRFLRNLRIDYCKLPEAVVLLNSTKYDYSCLYY

SYSSPSFLWDFGWLAYNNHFSPVCVKETKIREAKYEVVSYLGEICQATKTY  
TIDQVLVGLHGFLTPVQDLPKERAFLGTNWQKLQKAGYAITNAVTQIAKITDL  
NNEAIVSGIYLLKDHIVTLMEATLHDVSALGNVVTIQHFHTHLAQFKLLLVEN  
RIDWNYIYYEIIHLVDSAGSLTLVTIQHPYTIVNQCGETKYLHMEECTEQDYK  
ICEQVTEVLPCGSDCPVLAKTVKPGYVHIESLRNGSYIYMAHYQDCGIKPYVP  
QIVTVNATVKCLGYEIQPPLVGILAKLKNIQIQVKSQTELLRLDIHEGDTPAWIK  
QLAESTKDIWPTTANIFGKVGEFLSGTFGGLFG---TLGYIKPIILGIVILLIVIV  
VKIIS

>SFV<sub>ssc</sub>

ARPHLTHYVLRMTEGWWGPFVRIILQDESGNPLSILETTLDEMDRVFDGINLS  
PGTERYGPLCDGNFLYTDDAWNDFNPMSALEVKQENEDAHERLRVLPISQIRT  
VIGNTPVDPKKVPLWIAKSASAEIEGVMPTNTPDIRCRLVNALLPQHGGILQPH  
ECNSWYTRVNGMIPLHALPQTLQVTKKEGILVAYQIGMTFTGQNFPLTWGIL  
RPLLPGQAVVAMMQGYLDQYPTDDLKAVNFASILRLNYMGQNIRNQSSPSLT  
VRGQPATTPVTTSGSTSSTTESSNPNYNFRPRVNQPPRENTTQNNTRRPGSQG  
QNRNRNQNVIEHDQKLGWYDGAQITCIPQVYLEQEKHVIETVNGKTQRDA  
YYIKLKINGKKIETEVIKPSYALITPNDIPWFKPGADITKEEKGMPLYKLLDKY  
DPLWQQWENQVGNRQITPHIATGTINPKPKQYHINPKAKPSIQIVINDLLKQ  
GVLKQQNSIMNTPIYPVPKTEGKWRMVLDYRAVNKTIPLIAAQNQHSAGILT  
LVRQKYKSTIDLSNGFWAHPIDQDSQWITAFWEGKQYVWTRLRQGFNSPA  
LFTADVVDLLKEIPNVNVYVDDIYVSTETINQHFQVLDKIFQKLLQAGYVVS  
KKSNNLCRYEVTFLGFTISKYGRGLTEEFQEKLRNISPPNSLKQLQSILGLLNFAR  
NFIPNFSELIKPLYELISTASISWEPKHSQALNNLIALNHADNLEQRNGEVPLVI  
KINASNTGYIRFYKNGKRPIAYASHVFNHTEQKFTPVEKLLTMMHKAIIKGI  
DLAIGQPIEYSPIVSMQKLQKITLPERKALSTRWLSWLSYIEDPRFLFIYDKTLP  
DLKEMPTQTDDYNMPLHQYLAVFYTDGSSIKSPDPTKTHSSGMGIVQAIYE  
PNFQIKHQWSIPLGDHTAQYAEIAAVEFACKKALQVTGPVLIVTDSYVARSV  
NNELNFWRSNGFVNNKKKPLKHISKWKSISESLLLHKNITIVHEPGHQPSSTSV  
HTQGNALADKLAVQGSYTINNITKPSLDTELRAVLEGKLPKGYPKNSDRPKLV  
KQAHELAHTGREATLLRLQNQYWWPKMRKDVSHCLRTCMPCLQTNSTNLT  
TRPFQQIRPSKPFDKYYIDYIGPLPSEGYSYVLVVVDSATGFCWLYPTKAPST  
RATVKSFLNLLGIAVPKILHSDQGSFTSSDFANWAKEKEITLFTSTPYHPQSSG  
KVERKNQEIKLLTKLLVGRPAKWYPLIPSVQLALNNTYSPKIKLTPHQLLFGV  
DGNIPFANSDTLDLKREEELAPSTAKTWTSPVGLLVQERVYRPSQLRPKWKKP  
TPILEVLNERTVVI-DNNGQRRTVSVDNLKYTPLQSLPPEQKEPSWTQKCWVP  
GIILDWNSTRDLLFEPHPKPIIGKERVGLSQQVILINSESIATSLEIKQEHKHILVE  
MIKEELLSLQNVMLNFDLPLGDPKTQQEYISQRCFQEFKHCYLVKPWPTDDV  
VQDMCPALSAYWHPQGQNKLFNRITRLDYCKYPEAVILLNTTKSDYSCLYYS  
EYSSPSYLQDFGWLAYQGHFSPICEKETKIRMPGYTVYSLFGECLNAAQQHG  
IERALIGLHAFMTPLQEVNKERAFIGNWGLQAVGFTITNTVSKIARIIDLNN  
EHLVSGLYLLKDHVTLMESTLHDISILGNAVAIQHFHHTLTQLKLLLMENRM  
DWTFIYYEIIHLVYSADNLVQINVEQPYEILNVECGKSTYLHIDKCEEQDYVIC  
EVIQEKQPCGSDCPVKARTIEKGYTYIQPLKNGSYVVMESHFQDCHIKPYIPQIV

TVNATVKCLGEVFQPPLVGIITKLKGFQVQIQQAELLRLDLHEGDSGQWIKQ  
LASASKDIWPAAATVLGKIGDFLGGTAGSIFG---IFGYLKPIFIGLTLILIVLVFK  
ILS

>SFVocr

SQQHLDTLLVRITGGNWGPGIEVLLRDTLG-PLQILHLNYQDAIIIFDMIIPSEGV  
HRHGPMFDGLWIHGDDYSMNFQPITAHELTEEVELLTERMAVIPINVIRSVCGD  
TPSNPQDIPLWMGRIIPAIEGVFPIDNPNLRMRVNVNALLALHPGLAITELNAQT  
WHMRALGHTALHQLPALLETIVKTDGILPAYNMGMEVTQQDFS YVWGILRTL  
LPGQAFVLSMQNELDRLPA-AQRPGMFPGLLQLNSRGQNIKTNTQQQAPKPR  
QQASASPSSQGDNRSPQPQGGSPRYNFRPRVQPPDRNQQPGQGGQRTQQTNQ  
NRNQGNVQLRAHHLKGFVDTGSSITCFPKYTLVEEQYDISTIHGTVSQPVYY  
IKFKVNGKKVEAEVTESPLDYVILCPSPVWLSTKTRVNQ---KQLQKLFIQYD  
DLWQKWENQVGHKIPHHIATETVAPKPRQYHVNPAARPDIIQIVIDLLKQ  
GVLKKQNSPMNTPVYPVPKPDGKWRMVLDYRAVNKTVP AIGAQNCHAPGIL  
SSLYRAKFKTTLDLSNGFWSHPIPTESYWLTAFTWQGSQYVWTRLPQGFLNSP  
ALFTADVVDLCKHIPNVSAYVDDIYVSNDAEEHLRTLEQLFRTLMSAGYIVS  
LKKSKIGVSAVDFLGFETDDGRGLTSAFKEKLVNIQPPSSLKQLQSILGFLNFT  
RNFVPNYSELVKPLYNLVATARISWTLENTEQLNQVISALNAADNLSERKTGV  
PLVVKSNCSPTAGYIRFYNQGD RKPIQYVNYIFSKTELKFTPLEKQLTVLHKAI  
LKGLDLAGGEDIHFYTPIASISKLQRTPIPERKALHVRWLTWITYLEDPRHFHY  
YDETLPLAELPEIAQG--NQLPLKEYTSVFYTDGSAIKNPNPKKAHSAGMGTV  
EVTYNPEYKVLHEWSFPLGDHTAQYAEIAACEFAIKKASLLRGPVLIVSDSVY  
LVKSFNEELPFWISNGFLNKKKPLQHISKWKTIAACYQNKKDIFLLHVPGHQ  
KLLTDEHAQGNALADKLAVQSSHKVLFIKKPSLDAELIQVMEGKYPKGYPHK  
GDRLALITKAHNISHMGREAVLAKIQNVYWWPNMKKDVKHVLTICSQCQQV  
NSFNLKPQPPQTARHVHPFDKIYMDYIGPLPPSDGYLYVLVLDVSDCTGFTWLY  
PTKAPSANATVKALHTLTGTAVPKVLHSDQGS AFTSSTLVDWAKERGIRLEYS  
TPYHPQSSGKVERKNSEIKRLLTKLLVGRPLRWYPLIPTVQLALNNTPNVSSGK  
TPHQLLFGVDCNLPFANKDTLDTREKQLSPPPSRSWRPSVRLLVQERVYRPS  
ALRPKWRKPTPILEVHSDRLVTIKDHLGNIKKVSTDNLKLTPTPTLTKSETLPLP  
YTRMWTPGPIIAWNESRSRLLVPHTKPVVKKERALGFSQIIIMSSDSMANSMG  
LKKEDIHLLVDLLNEEMEQLQNIILEFDLPIGDPHDQSYIEQRCKAALQHCY  
VVKGWPTDGAILDQCPALPPDWTTQGGQNRLFRSITTFDVCQRPEMVFLNNTT  
YYTYSYFSPSYYGREALNDFGYLAFTDMFPAPT CIETKEVRKPQYKVYSAFQ  
ECMIKSQQYDINDVIAKLEALFTPLQGRPQNRAFM-TNFHKIQSIGFNLANAIS  
TVSKISDLNDNQLAKGMHVLRNHLVTLMEATLHDISKFESGLALQHLHHTLA  
QLRSTLQENRVDWSILYFEIHLVFN SGQLTQVFVEQPYNLVSMECNIPTYLHIE  
ECVNQDYLICDIVEEVLPCGSDCPVMAKAVKAPFVSITPLKNGSYVILADTSA  
CTIPAYSPVLVTTNDTLQCYGHILKRPLVGVIAQLKDLKFQVRSKELLQLDLH  
EGSAPEWINRLAAAAADIWPATGQALKGLGDFLQSTVGSLLGTGLSFLSYLKP  
ILIGIGLIFLVVILFKIIS

>SloEFV

AQGHQDILTVRVDAGPWGVGIQIDLQDGNRQPLPLLNVSYAQLMAKLGDVPF  
LTGVYRHGPLYTGHWLPGDDLSHHFLPITMAELQEEVALLRERFQALPMNHL  
RAVVGATPNDPQAIALWLGRNVQAIEGVMPINNGPMRKQVVNALLASHATL  
HVTDQEAQDWYQRAHGTLALHHLPTVLKDIANSQDGVIVAFTMGMMFSNDD  
YALVSGIIRPLLPGQA AVVAVQAQLDILPDDNAKASAFPEIVTLNILGQPMHPP  
GSQQCSNGGNRQKQDQEGSQGQNHQQPQNQLRHYNLRPNVNHPRWEQQQQ  
DQSKDRGVQSNSQPQRSGVQHRGKIF-----DIMTQWQRFLVSQYEEIQTIHG  
KQKMPMYLTFKVDGKHFVGVQVIPELTDYALITAKVVPWIKLKSNISEQGKD  
KLRLLLHKYDSLWQKWEKQVSHRKIPPHIATGTVAPKPQKQYHINYKAKLA  
IQTVINDLIKQGVLLHQNSSMNTPIYPVPKTNGSWRMVLNFRVAVNKVIPLI  
QVQYSIEILTQMQRQYKTTLDLSNGFWAHPIRKESYWLMAFTWEGKQLVW  
TRLPQGFINSALFTANIVDILKEIPDVEVYVNDIYFSNVTEEHLITLKQVLKIL  
LKSGYIVSLKKEIAKEEVTFLSFNITKEGHGLTAKFREKLLNISAPKTLKQLQS  
ILGLLNFAHNVITDFAELTKPLYLVISRAHIQWMEKEGMALQEIIKKLNNASYL  
ENRDIQKPLIKNSSPTAGYIRMYNKGKPKPIQYVNFIFTPAEIKFKPTEKLLT  
MHKAIKGLDLSQGAQVHIYSPLASPTHIQKTPLPERKGLHSQWITWMTHFKN  
PQLIFHHDPTLPDIQNLQPLSEDNMQIDLTSYAVVYTDGSAIKNPNPQKTHS  
AGIGIVKGFDPNFSIQQWRFPGLDHTAQYAEISALEFAVKKAMMDKGPILIV  
TNSMYLAKSFNEELDIWISNGFVNNKKKPLQHISKWKVIANCKQNKPSIHMV  
HEPGHQKQGTSIHTKGNLLADQLAVQSSHMVGMVTLPSLDKELEQVLDSPNP  
KGYPVKMERVKLAQQAHTIHHGGWEATLIKLNKYWWPNMIKTVRSVVAN  
CEKCQVTNASSQIPTPKTIIHPDKPFKDYMDYIGPLPSSHGHKHLVDDAR  
MGYCWLFPTKAQANATVKALNFLSGTAIPKVLHSDQGSFTSATLQQWTK  
DRGIQLEFSTPYHPQSSGKVERKNGKIKRVLTKLLYGWPQKWPYPLIPFVQLSIN  
NIPSSQTHQTPHKLMTFGVDSNLPFANVDDANLSREEQLSSSCTSGWKPFIFQFI  
QERVQKYTPLCPRWKKPTKILTVEFDHTVEILDPLGQRRKVSIDNLKPTA-----  
---PTAQVRFWHPGPIISWNLTRERFWEQFPKPIIHKKRTLGISQILLIDTPLV---W  
YIPLKDKKILTQLIDNEFAQLQEIVLPFTLPLDQPYTQEYQKQKGFQEFQGHY  
LVKYWLTSKIIQDHCLALPSEWK---QNNLFKSPTITQFCNHPELIYFLNTTYTTY  
SCLYYAKQTVSEIKRDWRQLAYSKKFPAPIC----KIVVPKYKVKSLYQKCIKA  
KKHHVESVQLLNELFIINIKELPTEDKRWGPNTQRLEKVSMMANSTATVSKL  
SDLNEYLFADGLHILKDHVVTLLANMKDTQHIDELTTAMLILSYIQNFRIPST  
EGRIDWRILYYQIIHLVKTGTQLTLTKIHQPYPYTHIS-ECSELYLEPKGCEQRDY  
LICEEINLHQTCGSKCPVTGKAV--PYLEFIPLKNGSYVVMSTIDCNIPPYQSSI  
FTINDTVTCFEKILKKHLVGLAKLKKIEVKADTKSDLLRLELHKGDTPEWIKQ  
LGEALEDVWPAASATKTIASFVSSATKGIFGGIIDLTYTKPIVILIIITILIVLIFRI  
LK

>ERV-Spuma-Cma

RPPHGENITVCIMNGPWGIGKRLELQDQGGANLPIPQWQHQDLNWLQPPDI  
NTGEDRHGPMAPHEPFTPGDEICEGYLPITLEEQEAALLARQVTSLPFSNI-A  
AVGPTPMDIKNIFSWAERINVLEGVLPMMNNAARRQVVNSLVP--YQLSLNE  
EECVSWYSKAHGHIPAKLGEELQRISSEQGIKTAFLGLAMTNQNYGHVWR  
IKNLVPQGAPLAEITRLEALPSDQERIRQFTRMLDLDPTRRTGTSRSSQGKS

KGKKPFKPEERRY PASQGR TKPRKGGYNLRPRVTPPPQYGQWDQS-----RPG  
PSAPPVQLQGQIIEAEWDSGSEIMILPKEVLKGKIIKLITITGEIEVS VFYTTIVID  
G-KTEGNWLNPLMDKLFQPKIRLGVLGRKNLLELTLRSNREKFFWIVLPLVAE  
TENQVGHRSVLP HNIAAGKIKPKPQKQFKINPQAIPSIQIVINYLLKQGIPRQET  
SEMNTPVYYPVKGEGKWRLVLDYRAVNK VTPAIAAQSCHSTGILMQLTRKKY  
KTTLDSL RVVFGPILSPK----IAFTWCGKQH VWTQLPQGFLNSPALFSADVVDL  
LKEIPDVS VYVNDIYFLHDTEKEHLKTTRHLHNI--ERGQIHSLK KSEIGKREVN  
FLGFAITNEGRDLTD-YEEKLLNLQPPKTLKQLQSILGFLNFAHPFISNFAELVKS  
LHDAIHKANNNESFENQDALDDLITAIKQAALLTERDPTKPLAVKLHVSPSRLY  
VRLYNMADRFPFQYTSIIF-KAEKRFTLTEKLLTVMQYALIKSF DIAQGM IHV  
YSPLRCPETLQRHTIPERKVLSSRWLKWMSHIENPQIKFHYDEELPD LASLQTP  
SEKQVRIRPLTEYKQIYYLYGSATTNEHKRQ---ARMDAVQAIFNPDYQVLNVW  
SIPLGQH LAQYAEVAALEFALQQIPMDQTPRLIITDS DYVSKRYNSKLEFWESN  
GFCNAKGKPLHHISLWKSISELKKIKPWVHVTHEPGHCI-GTSVRRAGNAAAD  
SLAKKASMINRVHTEPTIDTDLGQCINTPNPPGYKKKTERHMITERAHGHAHF  
GRDATLAVL-KKCWWPYMIQTVQQVLQYCSKCVTYNSANRAPIPHDKRTIPE  
SPFDILFIDYIGPLPKCPGQDYVLVIDGATSFVWLYPTTGPTAQATVRALDFC  
KIAIPKKIHS DQGPAFTADISKEFAKKYNIQWEYSTPYHPQNSGKVERANGEV  
KAALTKLSGSCPGK-YAYILLVQLGFNNRPRPSIKRTPFKLLFGVPMNVEF--NLT  
SDLSREEQLPPCSPHSWHPLVGLLVQERV TTP--LRPRWK PPTLIKVLSDRVVEI  
VDKKGNL KQGSIDNLKVTPCVTRYSAAYATSTRIAMWRQGPTITWNQTRIRLY  
EFPFKPIVAKERVLGISQILILDSDHMAEANNLGHGPGKEILTQLLNE-----IPFEI  
PLDGPQTQQEYMQKKRCHEFAHYWIKWPESQVIADHCPALLNDWHDQG  
KGRWFKPMDDL SFCRHELT VFLNGTYHKHSCLLYPKYSRMEEVSDTGLLLH  
DHTFPGFWCIEAKQV--QNYSLYSLYQQCLFNSQKHPVDDVISGMKQRLSSILD  
ISGGQAIWGTNLQKIQEAGLIPDSSITKTAKISDLND-KLAKGLHLLRDHLITFP  
EHTI-DVIQMSQSIIAVMTHSHIQNLRILLTEGKVDWDTLYEIVHLVYTGNRG  
GRVWLKHPCTLITQGCGEVKYLEVRECYEQDY LICDEVIKHEPCGSRCPIMVE  
PIVSPYLRIGPLKNGNYIVTTSLDECSIPPYQPSLITVNETVTCYGYEFKSPLIGII  
ADLRQIKIELRANTELLRIDLREGYTPQWLNRLSESIADIWPAAAGAIKGIANGI  
KDLTSG--GTAFDLLAYANPVIIGVLLITLVLVIKLIS

>ERV-Spuma-Spu

HYRDGDDYCLEIRNGEWGIGISMRLRDVVFNPLTVLPINRQDLNLMAGIVEIP  
RNIRRHGPISNADYISGS--GYNYTPATTEELEQEYTLRRNLRVLNMANIRAVT  
GPTPKDFKEIPMWFESHLSALEAVTSTASPLQKDEV MQFSSP--SICFFDRAGVN  
NWYVKTHGQVGIADLNEILRKITQEQQIVRAYGVGMKFL-SNHDLIWGILKTL  
CKGDVLKAAIQSKLDLLTTEQE KIRSF PKIVQRDYLGN NPRKNLEQEDSKGKN  
QGSNRKQFQAQKDQDSENPSAATYDLRKGSQFPHRDFNSRGGIPTGNKMAE  
NRQAQGSVEIANKTFAALIDTGANQSCIQSKCL----PHVYSTKGQCILESYFLEI  
QIAGKCLEIEAICDFTKHDV VIAHEVNF IQNQADCAKNEKTKLRDILYSLKPYF  
QQFDNQIGHRKIQPHDLSVKT-QPKPQKQYPINKAAINDIQKVINDLIAQGALI  
KQYSTMNTPVYYPVKPNGKWRMVL DYRALNRVSPSFTVQNLHMSGMLGNL  
ERHKYKTTLDSLNGFWAHPIREEDRYLTAFTWQGTQYCWTRL PQGYLNSPAM

FSADVIQLLKNIPGVNSYMDDIYFTNENLDQHLATLKQVVTVLGEAGYIINLK  
KSQICRSKVKFLGFLLTDSGRGLTQEFKEKLLTLQPPKTLKELQSVLGFLNVAR  
ILVPDYAQRTKPLYNLIPLA--FWTLEAQQALDKLIVLINQAAELNTRNNTASLE  
ILVRASHKGGFASYNYGDSKPLQYISYVFSNAEQKFLPIERVLCMCNLAILKG  
KDLAQQQKMIVKTPIASLRQVKKGSIPNAKALHSRWVQWMSHFENPQIEFEY  
VEPSNDLENLPAFSIEPVSSKPLHEYQKVIYTDGSAMSCKQGKHMWKAGYAV  
VIGTFNDEYHMSDSIQMPLGNNTAQYAELMAVHKAIEI----SPPVLICTDSFYIA  
RGINEELPIWRSNGFLDNKRKPLKHAHRWQKLATLLDDKPLITVMHVPGHSK-  
-YGSVNGNTLVDLLAKEAMKVLTRSQKKCLDGELTQCISPINPKGYPADTR  
PNLIQEAHNHVHHSSES-----LKRSYWWPGLRKQVQRRLAQCEPCLRTNPGPVT  
RPPYLKNPKPLSPFDK VYMDYIGPLPPSHGHNHCLVIVDACTSFVWIYPTRDQ  
SASTTVRTLTSFISLGLPRILHSDKGGAF TSHQM QSFAK SFGIVLEYSTPYHPQS  
AGVVERKNGEIKRALTKLLVGRSRQWY SLLPLVQLGLNNLPRSDCHLTPYKL  
LFAKDMTTPL-----EQLASSSSYLSTGAVG--TDDRIKSRTGFSPAQHRYQPC  
SSILQEKA VS-RDPSSRPRSTNPQSFDITKIFGLGTEDLHPQTNL RQWLPATPIHW  
NLSRPKIHNPFPKPIVSQRSELLVPFTLNIDTRALAYCSGLSKDANTHLAKTIEE  
DLQDLDSRNAHFLVPGTDPWHQTSYADKMCFASYGHCYFVRKWP RP HVYAD  
HCDCLASQWHDNGANEMFIGVTGTSFCDIPRYPIFLNRSESIVSANLMGNYTA  
KER-ASLGNKRWFNLIQGPLFVNATPFFADNYAIYSLYQKCKTLSEKYSLFSVL  
QALEEFIASLLQMNPKRAIWGNNAQIFRKTNFLLA KSMEKISRLQDANNINLR  
NGVYLVDAL TQVALIVKHDLAVLSDELIMEIIVTQLQKIIFSLSN GHVPWTIG  
YFQILHVLRNMSPQM FLETQHTYILT NVKILDICFLHI-----SPCGTSCPI  
RIQSSNISFVFIDSLTNGSYLILAGKSECNIPALQPSIVTVNTTITCYGRQLFPPT  
GIIAKLQRSEITLEVKQLLQRIDIHEGDFPLWLNRLASAVSAAWPSLANMANSI  
AHADTSIGTSILGTGLQILTYLKPIFIAIVLIVLLIIVIKIFR

>CoeEFV

ALADEQFLICMMDYND FGI-VGTLVLDNAGEIINILTFDYQELVNEGLQPQFGA  
GLRRHGNLRGVLYHQGGP-GWQFAPLEPAEYRNQYQALRRRLQQLNIGAIKN  
ILGDPPNRGEDFLDWFQARHTQIETITEGYTAEQRRQLYQYILPT-TWASVPIAH  
CNNVYIQITGQPPIIRLTKQIPLITASQGILVAYDHAYRGLRGD HVM AFELVREGI  
P-MAVRLQITAALQALPTNQERHAQFADIVRLNYNLAMILTPTQKQGYSRGQV  
KWTPKQEKEESRPQSSQGKKHRYDLRPRHDGPWQNQGGQKWWKKGQDKQ  
QPKYKKEGVCVGD TVVLALIDTGAEHSVIDKCLVPKGHQKLQGLNGSVSFPV  
FNLTINISNTDILLKVKANLQPYKLIISHQLPFFPQPTMLSQASKLKLKALLEKH  
YEV LQRHKNQTGFRDIEPHQL-KGKIHP-AQKQYPINTKAIPSIQVVINELLEQG  
VLVKQTSPTNMAVLPVPKPDGTWRLVLDYRALNKHSEPVRAQNQHSSGILAN  
IERKAYKSSVDLANGFW SHPIREEDWPKMAFTWCGFQYLWTRL PQGFLNSPA  
LFSADVISLVGQLPGVYCYVDDIYLTHDTEEEHLKILDQVLEILIKAGYVINIKK  
SKLCKRVVDFLGFSLSDDEGRGLSDQYREKLAAIKPPQTLRQLQSVMGLLNFSR  
LFVKGFSELAKPLYDLITVKPYHFTPQAHEALTKLLSAIQTAPNLNTRDNTAL  
VIRIVTSPRSVAAYY NVGDKLPIQYVSYNFSQPEMKFSKIEKVCVMVNMALI  
KGRVLAHEQDIEIHTAIPALQTYTRASEPNAKALATRWDLWCTLFSQRLTFK  
TVTNPDLDCLPPEFEDEVAVASPLEQYVEVYYS DGS AKRNQQKN---YAGIGIV

KGKFTTHFEPEETKAVPLGPASAQYAEVMALLDAVKQATD-TGPVLICTDSVY  
AQRGYTEDLHYWAIRNFHDSRNAKLYADKWKQLDQLKRDKPLVRVIHVP  
HTP--GTVHSCGNGLADSLAQQGAVKILTRAQRTHMDSILQQCLDPPNPPGYPTA  
HARPLIKEAHCHIHLLGGNNTGKTLRRLYWWPGLYTECKRYVANCPECLAVN  
VTPTRPPNLRPPR-GALFDKIFLDFVGPLPRSNGYTAILILVESLSSFTWLLPCR  
DQSASTTVTALSFFPASIEPKCFHSDQGGGFTSQLFKKMCSENRIRVEYSTPHH  
PQSAGVVERKNRGLKAALTKLVRNRPRKWFQVLDIVQTGLNNTPIARNEHTP  
FFLMYGQHMNTPLTNAEPSHPDRMEALAPESNRLWIPKVGWVQEKAVRAN  
SLRDKYHKPTQIIEVLTPKAVVIAATGANRKTVSVDNLKRTPVTRSAGPKKKP  
SKVGGCYKIQVPMEDNNSMSRTRRVPIPLSLTRGLVQIPVNLVLNSKHLAQ---  
-SAKGRKMLSNLVLMEQAKLQNPSEVASGSPEQPSSYLADQCFAELGHCY  
LIEYLPDPYIMADECLCLSPWHVNG---YLMEQNHDTFCSMPRFPALNTTLY  
HVTCEKYPT-----TLGNKRFYGIHKGPLSI----IDRPNYSVYSLYQICKDRVKIY  
PLTDVLSGLKKLV-YVLDMPVKAIWGTNDQYLTQSATLTNKAINLLSQTMD  
NFAQLEQGFKVLQSSLMHTLRVLTKDMATLGDAIKVKQVEAQIQRGLALLEN  
NKVPWALLQMQPLFLVKTNNLLALAKVRPPYQYIA-KCGNINYLKVKECYLR  
GFRYCDNWEKQLPCGQSCPITVKPIT--FAQVTSLGNGSYIIMVSYSECDIPSMR  
TVIVTPSTRMTCYNMTLF-PLVAVIARLQDYEITLRSRQLLSMVRFEAAEIPQW  
LQLIGELIELIPQVKS AIEWGIDLTAKTITQTVTSVLQSLNFLVPVLIAGVVFV  
LILVLKFFS

>ERV-Spuma-Rbi

HIREDQSFVLHLQVASDSSPLKALTAQGRHQGLNDCQMSFSLGKCLFVENPIP  
VSEKRGGLAFTEPRPPLDAILSFDAPGKKNAFYNALLHCFQTLRDRKADRVR  
ALGTLPADVNLPEHLATRLVALEAVTGACNSRTRHYIISTLMP--QNLVPPPSFC  
DSWYRSIFGKPLITNLGEVLRHILQKFGISAAYSLGMLVTMSNFDQVWEILKD  
VMPDTSIRIDLSNRLSALAP-ADRHEQFPFIIQRPLIPSKPLKQAQPGSDRPRER  
REIQR-----TQPEKTSRRVSFHFRN----PDRNQRDNRG-----SRQDYTPPPSTKSL  
MFVGMMDSGTTINILTREWDTIQYVTITMFAGKQLATVEIFSPYFKGRTIKVAC  
LFDEDPAIYFTQAAPVPLPSMMELEDPGEAELQNLFTE----WQLYHTHTGLVQT  
PKPIEIVLNKPFSPQKQYPVHKKFYNDLNIISQKLTQGVLIEEYSEFNSPLLVP  
KPNGSTRMVIDYRVLNASETVAQAQTLNPASTIDNLRPRWKATLDLANGFWS  
IPISTSP--VTAFTFRGKQYQYTRLPPQGFKNSPVLFSAAVEELLQNIDNAVYVD  
DIYLASDKLDVLWDSVVKLIQVLGEEGFVNFAKARIGFEEVKFLGFLIGVAG  
ASLAPTLQEKIISFPVPKTSRQLQVIMGTLNFARKTVPSFASLAAPLYDLLKVV  
ARDWTAVHSECLRALQEAVKVSAPLAHRKSSKDLVTLQVSDSHFLATISNH  
AESQPICYITHFSQPERKFNIVERTLAVRYCLSKVSALAQQKIIHCYTGIPQLQ  
AVTRHSLPESRALSTRWVQWRADQYRDDVQFHYQNGLADSDIILLTTETDRL  
LPPIYQVQLVIFTDGSATPSGDYLTAFAGAAANVILTPNGQWKVFATHTWRLGD  
MSSQQAELIAFQKALTHIEQPERSVMVCSDSTYVVS GFNSHMKVWENSDFLD  
VTGKPIAHRAHWRLIFSISQKLTQVLV LHVPAHQ--VGWYSRYNSLADEAAK  
LAA---SQQEITVRARLAR-----HGS LHLNAATLCQHSDGVL----T  
RSQAKK MVSDCLDCQRTNPKRTGHPVEGTLPRGIRPGQVVYMDHVGLTSSR  
GYRHILVVLDSFTGFVFLFAQKRITAVTVNRLAIVFGILPFQFLCTDGGPAFKN



AEVETFCADHSVTHRFSYPHRPESNGMVERINGEVKRSLQIFLQSNPSNWYLH  
LPEIQIRINSTITAN-HEAPAMSLFGFSMLENMASSEAMVTSDKASRSPNP-----F  
QIGSVVLSKTHVRGSLEPYWSNPFIVTELLGDSGLLLSDSEDPKKVVSIRDVKL  
VSETSTAAQRSHCSSNMSSWLSNTQLHSTFSPAVILVPYHGWLVDQDPVLLHID  
VPRFRFYTHQVWQPESLAGLESRLVALFLQLERSSSLQLSSITSESPLD-----GFRA  
EFCSIRYQNLFLTGILETPSWKLQHCISFPSTWG--GEDTGFMIKDSLVCRLPYE  
ILFLNSTHYHVFCDEL PVSFTHWRGNPNPFCTRSSSTQTNWQYQVNLCNKRF  
NGRSLTAACIRLAEGLNDTEVTSVLDLIVQWLNDSTANRKRNRNALKQEVQNT  
FLNLNDRIKTAIKGIQSNEYQLRAGIFQLRDYLAQTLQLGIDAISTTDEKIQVLA  
RIEQLTHFIDGLTSPKPKWGTLVQGVQRFLESSNGIKTIKIFEP-THLCINNAGYH  
WIAQGCHKVPVTVCNLSLVQSNTCEADCPLEPNPGPLVEVFL-KLPNGSYILRS  
NKAQCGFQPGILYLVTALSVIKCGPWEFYPTLKMLLTHVLNVNVLRLNSSLW  
LMSEIELTASEWELILDELLEVFSNALGRAFSGLVGGIAKTAVGVVKTLLHDLG  
ILFPLILGIVIIGVLFCLK---

>exCFVrbi

-----GKKNAFYNALLH  
CFQTLRDRKADRVRRALGTLPADVNLIPEHLATRLVALEAVTGACNSRTRHYII  
STLMP--QNLVPPPSFCESWYRSIFGKPLITNLGDVLRHILQKFGISAAYSLGML  
VTMSNFDQVWEILKDVMPDTSIRIDLSNRLSALAP-ADRHEQFPFIIQRPLIPSK  
PLKQAQPGSDRPRERGREIQR-----TQPEKTSRRVSFHFRN----PDRNQRDNRG---  
-----SRQDYTPPP-----  
-----SNTGWV---PRYPVRDNRGTPPARFPAPEK-----  
-----PPAVSGAVTKADRPPPS-----SHKKP--VKRAT  
FHGNAGSTSKPPVDPE-----YVDVIYLASDKLDVLWNSVVKLIQV  
LGEEGFVVNFAKARIGFEEVKFLGFL-----IMGTLNFARKTV  
PSFASLAAPLYDLLKVVARDWTAHVHSECLRALQEAVKVSAPLAHRKSSKDL  
VTLQVSDSHFLATISNHAESQPICYITHTSQPERKFNVVERTLTAVRYCLSKVS  
ALAQGKIIHCYTGIPQLQAVTRHSLPESRALSTRWVQWRADQYRDDVQFHYQ  
NGLADSDIILLTTETDRLLPIYQVQLVIFTDGSATPSGDYLTAFFAGAANVILTP  
NGQWKVFATHTWRLGDMSSQQAELIAFQKALTHIEQPERSVMVCSDESTYVVS  
GFNSHMKVWENSDFLDVTGKPIAHRAHWRLIFSISQKLTQVLVLHVP AHQT--  
VGWYSRYNSLADEAAKLAA----SQQEITVRARLAR-----HGSLHL  
NAATLCQHS DGVL----TRSQA KKMVSDCLDCQRTNPKRTGHPVEGILPRGIRP  
GQVVYMDHVGPLTSSRGYRHILVVLDSFTGFVFLFAQKRITAVTVNRLAIVFG  
ILPFQFLCTDGGPAFKNAEVETFCADHSVTHRFSYPHRPESNGMVERINGEVK  
RSLQIFLQSNPSNWYLH LPEIQIRINSTITAN-HEAPAMSLFGFSMLENMASSEA  
MVTSDKASRSPNP-----FQIGSVVLSKTHVRGSLEPYWSNPFIVTDLLGDSGLLL  
SDSEDPKKVVSIRDVKL VSETSTAAQRSHCSSNMSSWLSNTQLHSTFSPAVILV  
PYHGWLVDQDPVLLHIDVPRFRFYTHQVWQPESLAGLESRLVALFLQLERSSSLQL  
SSITSESPLD-----GFRAEFCIRYQNLFLTGILETPSWKLQHCISFPSTWG--GED  
TGFMIKDSLVCRLPYEILFLNSTHYHVFCDEL PVSFTHWRGNPNPFCTRSSST  
QTNWQYQVNLCNKRF SNGRSLTAACIRLAEGLNDTEVTSVLDLIVQWLNDST  
ANRKRNRNALKQEVQNTFLNLNDRIKTAIKGIQSNEYQLRAGIFQLRDYLAQTL

QLGIDAISTTDEKIQVLARIEQLTHFIDGLTSPKPKWGTLVQGVRQFLESSNGIK  
TIKIFEP-THLCINNAGYHWIAQGCHKVPVTVCNLSVQSNTCEADCPLEPNPG  
PLVEVFL-KLPNGSYILRSNKAQCGFQPGILYLVTALSVIKCGPWEFYPTLKML  
LTHVLNVNVLRLNLSLWLMSEIELTASEWELILDELLEVFNSALGRAFSGLVG  
GIS-----

>AciFLERV

QMEDGEVDGIRSGDLPWIVAEQAMVRAGRGAPLRTSRQPMNDYVGMRTG  
NTPRQEAQREPMISSYAGRQP---EYSDISEKESEEEVDAMTSARQEDITGAVE  
LRVGQRKGTKKTPVWAERSFEFFKKIKALVQERSPTQSLQEYLKQHWQMV  
MTCTQDNQWLARATGQAAEEHYKRLVLEDFDDEDTKIEKARGQLDQGQTLS  
QVWHVLSNEIPVGRNVQALRRLMKTLPANSTQEQIREVVKLKRKFEEQRA  
EEGQRTQPNPQG---QQRKTDQRPAFQGPKNATSSRPS---PSTN-----KRAAGG  
KKEMDTTAQVTLEHAYAPYLVDSGAEVSMTRRALSPKGKLTVQLADASIAEV  
PYGIIIWILGRLVKIPTVEDQVGGAWYKPVNVPEVTEQKLLSPEGKQRLREIISK  
----ARFKNDCGDLGTKYIHTIEGGVHP-PVRQYPLNPGAVKEMDLIVRELLTG  
VIRQENPITNSPIQAVKKPEGGWRPVINFKALNRRTVANRASLINPQGTLKTLK  
LKPFSKCIDLANGFFSLRLTRGSQKTAFTHKGRSYVWERLPQGYKNSPNVFQ  
AAVMDVLDGL-GATIYIDDVFIADDTEEQHLDRQLKIVERLTAAGLKLNLKCC  
QFGRKRVDYLGQVSDD-LGLSEVYRKKIEQIEPPSSLNELQKVLGLCNVYRD  
YVPGYQRYAKPLYAKLKKPDWNWTAADQSNLEELRQAIQGALRLEPRSPTAK  
LVAEISCEDEDSATVKVSNEGGGL-VTLWSYALTSVEVKFPPEEKELAVLARYWS  
SLKDLAQQGQIRVITESQVHRFLRKATIESTKATNARWGRWEDILLDPDLEIG--  
---PLQPGVP----TAEKPTQEEYDWTLFTDGSRKGPDDT--AYWGFILKLGKEQ-  
-----TRQRGKAPGSAQAGEVTAVLEGLELEKRRKIKRAKIITDSYYCAQALKEDL  
TIWEENGYETAKGKKVAHEDLWKKIAELRMNL-DLEV VHQKAHVK--EGAH  
WRGNEEVDRFVQMRKIVFVGIEK-----NTPQGKLVPCDKGVTEAVHEL  
GHAGADPTRRELKQQLWIPV-REIRRVLKDCEVCGRYNAGRRGQRMGGLTI  
KSTVPWGSICMDVAGPLTGMKGEKYLLVLVDSMSGYVAVKPVRQANGSSVV  
SMLDQACCMGIPKELRTDNGTHFRNAKVDQWCQENGVMRVYSPPYTPQAN  
GVVERTIGLVKSWIGKN--ANGKEWSTKVLELVKTLNDRHRQG-RPSPAEL----  
NQRPF--SQEAGRSSDKRPSDDKMSLQVQQRVWIKAQAGA AVKAKYDKT  
DIVTEILDRNTVRLKKS----GIQGVQLKVPMTGKPTSQKNPLPKHSCGKYGN  
LTCWNTSARNLFMPWDANQTSENQTD SWNRIRKRMGTDELAR-QNFSTDHRW  
TISNLLATEDHETKTTKCNWIQPEGEPPEHQGYWQYEAVFPAPHKHIFEFWGH  
YDLKCDKIP---EKYN--TVDECLADITRLDSCIMPLGPLWFQTYYYTWR SIFSPT  
RAMHEEWLNYTFVHYEGDFPEG-----STRNRG-----VQKLPTVQELKSPV  
KGDFFDKIDKCVARRIFLSLNDSEWEGHGASPRCKLWQVDISFVSTWRYDCTGI  
NSTKELLQGWVEGHSRDKTRTWGFR---EEMEHWVIPCLSQSDNY-WVKY  
QYIATVYSKEHIWSSAIYRPDRYVRPRPWK-----TCIKSGH-ACTVSLARRPCS  
ELATVWTKTRPTTYTKLISNATNTWRRAMACDHCVIPSVPDTMITIAESHACL  
GLEEEFEWVG--PNLLYSNLTKYPEEVPDSDKH---TCAWYETLQTMAREVKT  
LAKGAEIIVAEGAGAVEEG----MVELLEKIWPYCLTLGILVLAACLALRELC

>AliFLERV

NTDHEETCGLRSGDLPWDMAEKVAVRGSATPPKKTEQQ---DLIRHFNRCDTP  
QTPVPHE-----SSEEDNDDSSMGSAAAQGQGTPKQLRVGQRKGEK  
KQVELWAEKEFREYKKIKTLVREPGAGEGKESYLKDVWPLVVNSTDCEAWLS  
HITGHPAQDYEFVPEDEDED AHIDRARLRLEQGQKLTPIWHQLKQNIAPT  
RYVKALRMVTKTMPITTTVAQMDAAVRLELLYWDERRKKESTPKPANPQG  
KTPQQRDKGPRQQYQ-PNNQGGQYRP----PERGGPATQGPKRAGGPPKMMDP  
RSRVTLNTYTLFLVDTGAEVSMTRRDLETEGYLYVQLASGAMEEMPYGIVI  
WLKGSIKI---SPSATTTWYKPVDPVEVTKQKLLSPEGKIKLKQIIES-----ARFK  
NDCGDLGTKFCHHIIGGVHP-PVKQYPLHPEAVAEMDKIVKELHALGIIREENP  
LTNSPIQAVKKPEGGWRPVINFKALNRRTVANRASLINPQGALKTLRVKKYKS  
CIDLANGFFSLRLARESQGKTAFTHKGKSYVWQRLPQGYRNSPNVFSQSAVLEI  
LEDV-GASVYIDDVFIADDTEEEHLKRLEEVVKRISAAGLKLNLAKCQFGQFK  
VNYLGFQVTTD-LGLSDGYREKIQQIQPPRCENDLQKILGLCNVVRDHVPNYQ  
KYAKPLYACLKKEAWSWTPKNQDDLKLEEKIQA VRLEPRNLTSRLVAEIFC  
ENEDAMVKVSNDQGGI-ITLWSTTLTSVEKKYPQEEKELAVLAKYWGSLKDL  
AQQQPIKVTTSQSVHKYLRKGTIESTRATNTRWGRWEDILLDPDLEIG-----PAQ  
LQ-Q-----TASQTKDKTYDWVLFDTGSRKGPDET--AYWGYILTQNGKEQ-----H  
RARGKVSQSAQAGEVTAVLEGLELTKRRIKAAARVVTD SYCAQALKEDLSIW  
IENGFESARGKTVAHKELWEKIAELRTQL-DLDVEHQKAHTK--EGSYWEGND  
EVDRFVQQRKIVLIGAEK-----VTPKGKEVPEYVAEVVVTMHGHLGAGL  
LPTRRGLVKQNLWIPM-KQIQVLRCTVCGKYNAGRRGKRTEGLTIKSTIPW  
GSICMDVAGPMTGKGEKYLIVLVDSMSGFVVVRPVRKANGNSVVSMLDYT  
CALGIPRELRTDNGTHFKNVQVNRWCEQHGMVRYSPPYTPQANGVAECTIG  
LVKNWLAKN--ANSKEWSLKSVDIGRALNDRDRAG-RSPSPDEL----NQRPFV---  
TEETGRSQEADPAPLEACPFVAVGQK VWL KARSTGAVKPKYEEVDTVTKVLDQ  
NTVLLKKK----GIQGVQLK PALMTGKPTSQKNPLPKHSCGKYGNLTCWNTS  
ARNLFMPWDANQTS ENQTDSWNRKRMGTDELAR-QNFSTDHRWTISNLLAT  
EDHETKTTKCNWIQPEGEPPEHQGYWQYEAVFPAPHKHIFEFWGHYDLKCDK  
IP---EKYN--TVDECLADITRLDSCIMPLGPLWFQTYYYTWRSIFSPTRAMHEE  
WLNYTFVHYEGDFPEG-----STRNRG-----VQKLPTVQELKSVPKGD FDKI  
DKCVARRIFLSLNDSEWEGHGASPRCKLWQVDISFVSTWRYDCTGINSTKELL  
QGWVEGHSRDKTRTWGWFQR----EEMEHVVIPCLSQSDNY-WVKYQYIATVY  
SKEHIWSSAIYRPRDRYVRPRPWK-----TCIKSGH-ACTVSLARRPCSELATVWT  
KTRPTTYTKLISNATNTWRRAMACDHCVIPSPDTMITIAESHACLGLEEEFE  
WVG--PNLLYSNLTCKYPEEVPDSDKH---TCAWYETLQTMAREVKTLAKGAIE  
IVAEGAGAVEEG----MVELLEKIWPYCLTLGILVLAACLALRELC
